# Supplementary material for: Preparation of mono-substituted malonic acid half oxyesters (SMAHOs)
Source: publisher site journal article supplement (doi:10.3762/bjoc.17.135), 2021-08-18

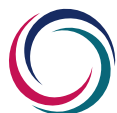

## Supporting Information

for

### Preparation of mono-substituted malonic acid half oxyesters (SMAHOs)

Tania Xavier, Sylvie Condon, Christophe Pichon, Erwan Le Gall and Marc Presset

*Beilstein J. Org. Chem.* **2021**, *17*, 2085–2094. doi:10.3762/bjoc.17.135

### Experimental procedures, compound characterization data, and NMR spectra for all compounds

## Table of contents

|                                                                     |     |
|---------------------------------------------------------------------|-----|
| <b>1. General information</b>                                       | S2  |
| <b>2. Preparation of substituted malonates 3</b>                    | S2  |
| General procedure 1 (GP1) - alkylation                              | S2  |
| <b>3. Preparation of substituted malonic acids 9</b>                | S5  |
| General procedure 2 (GP2) - saponification                          | S5  |
| <b>4. Preparation of substituted meldrum acid derivatives 7</b>     | S6  |
| General procedure 3 (GP3) - preparation of meldrum acid derivatives | S6  |
| <b>5. Preparation of SMAHOs 4</b>                                   | S6  |
| General procedure 4 (GP4) - monosaponification                      | S6  |
| General procedure 5 (GP5) - monoesterification                      | S8  |
| General procedure 6 (GP6) - opening of meldrum acid derivatives     | S10 |
| <b>6. Copies of NMR spectra</b>                                     | S10 |

## 1. General information

All commercially available reagents, including solvents (ethyl acetate = EA, petroleum ether = PE, cyclohexane = Cy, diethyl ether, dichloromethane, *N,N*-dimethylformamide = DMF, ethanol, methanol, and tetrahydrofuran = THF), were used as received. Room temperature means 18–25 °C. Melting points (mp) are uncorrected and were measured on a Büchi B-545 apparatus. Analytical thin layer chromatography (TLC) was performed on TLC silica gel plates (0.25 mm) precoated with a fluorescent indicator (Merck 60F254). Visualization was effected using ultraviolet light ( $\lambda = 254$  nm) and/or an aqueous solution of KMnO<sub>4</sub>. Flash chromatography (FC) was performed on 40–63  $\mu$ m silica gel with mixtures of solvents. High-resolution mass spectra were obtained at the ICOA of the Université de Orléans by electrospray ionization using a Q-TOF analyzer. NMR spectra were recorded on a Bruker Avance II 400 MHz spectrometer. <sup>1</sup>H NMR chemical shifts were referenced to the residual solvent signal; <sup>13</sup>C NMR chemical shifts were referenced to the deuterated solvent signal. Multiplicity was defined by DEPT 135 analysis. Data are presented as follows: chemical shift  $\delta$  (ppm), multiplicity (s = singlet, d = doublet, t = triplet, q = quartet, quint = quintet, hept = heptuplet, m = multiplet, br = broad), coupling constant *J* (Hz), integration.

## 2. Preparation of substituted malonates 3

**General procedure 1 (GPI) - alkylation:** A RBF equipped with a stirring bar was charged with NaH 60% (1.0 equiv) and purged with argon. DMF (V mL) was added and the RBF was cooled to 0 °C (ice/water bath). Malonate **1** (1.1 equiv) was added dropwise with a syringe and the mixture was stirred for 15 min. The alkyl halide **2** (1.0 equiv) was then added dropwise with a syringe. The reaction mixture was allowed to warm to room temperature and stirred for 2 h. Then, the resulting mixture was poured in sat aq NH<sub>4</sub>Cl (3 V) and the resulting solution was extracted with Et<sub>2</sub>O (3  $\times$  2 V). The combined organic layers were washed with water (10 V) and brine (5 V), dried (Na<sub>2</sub>SO<sub>4</sub>), and evaporated. Purification by FC afforded the expected product **3**.

Compound **3aa**:<sup>1</sup> Following GPI performed with dimethyl malonate (**1a**, 1.0 mL, 8.8 mmol, 1.1 equiv), sodium hydride (0.32 g, 8.0 mmol, 1.0 equiv), and iodomethane (**2a**, 0.2 mL, 8.0 mmol, 1.0 equiv) in DMF (8 mL, *c* = 1 M) for 2 h, the desired product **3aa** was obtained after purification by FC [V(SiO<sub>2</sub>) = 50 mL, PE/EA 95:5 (250 mL), 90:10 (250 mL)] as a colorless oil (0.591 g, 50%).

**R<sub>f</sub>** (PE/EA : 90/10, UV+KMnO<sub>4</sub>): 0.27

<sup>1</sup>H NMR (400 MHz, CDCl<sub>3</sub>):  $\delta$  3.71 (s, 6H), 3.44 (q, *J* = 7.3 Hz, 1H), 1.40 (d, *J* = 7.3 Hz, 3H).

<sup>13</sup>C{<sup>1</sup>H} NMR (100 MHz, CDCl<sub>3</sub>):  $\delta$  170.6 (2 C), 52.6 (2 CH<sub>3</sub>), 45.9 (CH), 13.7 (CH<sub>3</sub>).

Compound **3ba**:<sup>2</sup> Following GPI performed with diethyl malonate (**1b**, 6.7 mL, 44.0 mmol, 1.1 equiv), sodium hydride (1.92 g, 48.0 mmol, 1.2 equiv), and iodomethane (**2a**, 2.5 mL, 40.0 mmol, 1.0 equiv) in DMF (40 mL, *c* = 1 M) for 16 h, the desired product **3ba** was obtained after purification by FC [V(SiO<sub>2</sub>) = 100 mL, PE/EA 98:2 (1000 mL)] as a colorless oil (5.302 g, 76%).

**R<sub>f</sub>** (PE/EA : 90/10, UV+KMnO<sub>4</sub>): 0.45

<sup>1</sup>H NMR (400 MHz, CDCl<sub>3</sub>):  $\delta$  4.14 (q, *J* = 7.2 Hz, 4H), 3.36 (q, *J* = 7.3 Hz, 1H), 1.35 (d, *J* = 7.3 Hz, 3H), 1.21 (t, *J* = 7.2 Hz, 6H).

<sup>13</sup>C{<sup>1</sup>H} NMR (100 MHz, CDCl<sub>3</sub>):  $\delta$  170.2 (2 C), 61.3 (2 CH<sub>2</sub>), 46.2 (CH), 14.1 (2 CH<sub>3</sub>), 13.6 (CH<sub>3</sub>).

Compound **3ab**:<sup>3</sup> Following GPI performed with dimethyl malonate (**1a**, 0.60 mL, 5.5 mmol, 1.1 equiv), sodium hydride (0.20 g, 5.0 mmol, 1.0 equiv), and ethyl bromide (**2b**, 0.37 mL, 5.0 mmol, 1.0 equiv) in DMF (10 mL, *c* = 0.5 M), the desired product **3ab** was obtained after purification by FC [V(SiO<sub>2</sub>) = 50 mL, Cy/EA 95:5 (250 mL), 90:10 (250 mL)] as a colorless oil (318 mg, 40%).

**R<sub>f</sub>** (Cy/EA : 90/10, UV+KMnO<sub>4</sub>): 0.22

<sup>1</sup>H NMR (400 MHz, CDCl<sub>3</sub>):  $\delta$  3.72 (s, 6H), 3.28 (t, *J* = 7.4 Hz, 1H), 1.92 (quint, *J* = 7.4 Hz, 2H), 0.94 (t, *J* = 7.4 Hz, 3H).

<sup>13</sup>C{<sup>1</sup>H} NMR (100 MHz, CDCl<sub>3</sub>):  $\delta$  170.0 (2 C), 53.3 (CH), 52.5 (2 CH<sub>3</sub>), 22.4 (CH<sub>2</sub>), 12.0 (CH<sub>3</sub>).

Compound **3ac**:<sup>4</sup> Following GPI performed with dimethyl malonate (**1a**, 0.63 mL, 5.5 mmol, 1.1 equiv), sodium hydride (0.20 g, 5.0 mmol, 1.0 equiv), and 1-iodobutane (**2c**, 0.57 mL, 5.0 mmol, 1.0 equiv) in DMF (10 mL, *c* = 0.5 M), the desired product **3ac** was obtained after purification by FC [V(SiO<sub>2</sub>) = 50 mL, Cy/EA 95:5 (250 mL), 90:10 (250 mL)] as a colorless oil (710 mg, 75%).

**R<sub>f</sub>** (Cy/EA : 90/10, UV+KMnO<sub>4</sub>): 0.31

<sup>1</sup>H NMR (400 MHz, CDCl<sub>3</sub>):  $\delta$  3.71 (s, 6H), 3.33 (t, *J* = 7.5 Hz, 1H), 1.87 (q, *J* = 7.5 Hz, 2H), 1.46–1.19 (m, 4H), 0.87 (t, *J* = 6.6 Hz, 3H).

<sup>13</sup>C{<sup>1</sup>H} NMR (100 MHz, CDCl<sub>3</sub>):  $\delta$  170.1 (2 C), 52.5 (2 CH<sub>3</sub>), 51.8 (CH), 29.6 (CH<sub>2</sub>), 28.7 (CH<sub>2</sub>), 22.4 (CH<sub>2</sub>), 13.9 (CH<sub>3</sub>).

<sup>1</sup> Spectral analysis matches with a commercially available sample.

<sup>2</sup> Xu, Q.; Cheng, B.; Ye, X.; Zhai, H. *Org. Lett.* **2009**, *11*, 4136–4138.

<sup>3</sup> Szostak, M.; Spain, M.; Choquette, K.A.; Flowers, R.A.; Procter, D. J. *J. Am. Chem. Soc.* **2013**, *135*, 15702–15705.

<sup>4</sup> Neimert-Andersson, K.; Blomberg, E.; Somfai, P. *J. Org. Chem.* **2004**, *69*, 3746–3752.

Compound **3bd**:<sup>5</sup> Following *GPI* performed with diethyl malonate (**1b**, 0.84 mL, 5.5 mmol, 1.1 equiv), sodium hydride (0.20 g, 5.0 mmol, 1.0 equiv), and 1-iodooctane (**2d**, 0.90 mL, 5.0 mmol, 1.0 equiv) in DMF (10 mL, *c* = 0.5 M), the desired product **3bd** was obtained after purification by FC [V(SiO<sub>2</sub>) = 50 mL, Cy/EA 95:5 (250 mL), 90:10 (250 mL)] as a colorless oil (1.329 g, 93%).

**R<sub>f</sub>** (PE/EA : 90/10, UV+KMnO<sub>4</sub>): 0.63

**<sup>1</sup>H NMR (400 MHz, CDCl<sub>3</sub>)**: δ 4.16 (q, *J* = 7.1 Hz, 4H), 3.28 (t, *J* = 7.5 Hz, 1H), 1.89–1.80 (m, 2H), 1.31–1.18 (m, 18H), 0.84 (t, *J* = 6.6 Hz, 3H).

**<sup>13</sup>C{<sup>1</sup>H} NMR (100 MHz, CDCl<sub>3</sub>)**: δ 169.7 (2 C), 61.3 (2 CH<sub>2</sub>), 52.2 (CH), 31.9 (CH<sub>2</sub>), 29.4 (CH<sub>2</sub>), 29.3 (CH<sub>2</sub>), 29.3 (CH<sub>2</sub>), 28.8 (CH<sub>2</sub>), 27.4 (CH<sub>2</sub>), 22.7 (CH<sub>2</sub>), 14.2 (3 CH<sub>3</sub>).

Compound **3be**:<sup>6</sup> Following *GPI* performed with diethyl malonate (**1b**, 0.84 mL, 5.5 mmol, 1.1 equiv), sodium hydride (0.20 g, 5.0 mmol, 1.0 equiv), and 2-iodopropane (**2e**, 0.50 mL, 5.0 mmol, 1.0 equiv) in DMF (10 mL, *c* = 0.5 M), the desired product **3be** was obtained after purification by FC [V(SiO<sub>2</sub>) = 50 mL, Cy/EA 95:5 (250 mL), 90:10 (250 mL)] as a colorless oil (524 mg, 52%).

**R<sub>f</sub>** (Cy/EA : 90/10, UV+KMnO<sub>4</sub>): 0.37

**<sup>1</sup>H NMR (400 MHz, CDCl<sub>3</sub>)**: δ 4.15 (q, *J* = 7.1 Hz, 4H), 3.06 (d, *J* = 8.7 Hz, 1H), 2.41–2.28 (m, 1H), 1.22 (t, *J* = 7.1 Hz, 6H), 0.96 (d, *J* = 6.9 Hz, 6H).

**<sup>13</sup>C{<sup>1</sup>H} NMR (100 MHz, CDCl<sub>3</sub>)**: δ 168.9 (2 C), 61.2 (2 CH<sub>2</sub>), 59.2 (CH), 28.8 (CH), 20.4 (2 CH<sub>3</sub>), 14.2 (2 CH<sub>3</sub>).

Compound **3bf**:<sup>7</sup> Following *GPI* performed with diethyl malonate (**1b**, 0.84 mL, 5.5 mmol, 1.1 equiv), sodium hydride (0.20 g, 5.0 mmol, 1.0 equiv), and allyl bromide (**2f**, 0.43 mL, 5.0 mmol, 1.0 equiv) in DMF (10 mL, *c* = 0.5 M), the desired product **3bf** was obtained after purification by FC [V(SiO<sub>2</sub>) = 50 mL, Cy/EA 95:5 (250 mL), 90:10 (250 mL)] as a colorless oil (807 mg, 81%).

**R<sub>f</sub>** (Cy/EA : 90/10, UV+KMnO<sub>4</sub>): 0.29

**<sup>1</sup>H NMR (400 MHz, CDCl<sub>3</sub>)**: δ 5.76 (ddt, *J* = 17.1, 10.3, 7.2 Hz, 1H), 5.10 (d, *J* = 17.1 Hz, 1H), 5.04 (d, *J* = 10.3 Hz, 1H), 4.18 (q, *J* = 7.1 Hz, 4H), 3.40 (t, *J* = 7.2 Hz, 1H), 2.63 (t, *J* = 7.2 Hz, 2H), 1.24 (t, *J* = 7.1 Hz, 6H).

**<sup>13</sup>C{<sup>1</sup>H} NMR (100 MHz, CDCl<sub>3</sub>)**: δ 169.0 (2 C), 134.2 (CH), 117.6 (CH<sub>2</sub>), 61.5 (2 CH<sub>2</sub>), 51.8 (CH), 32.9 (CH<sub>2</sub>), 14.2 (2 CH<sub>3</sub>).

Compound **3bg**:<sup>8</sup> Following *GPI* performed with diethyl malonate (**1b**, 0.84 mL, 5.5 mmol, 1.1 equiv), sodium hydride (0.20 g, 5.0 mmol, 1.0 equiv), and propargyl bromide (**2g**, 0.74 mL, 5.0 mmol, 1.0 equiv) in DMF (10 mL, *c* = 0.5 M), the desired product **3bg** was obtained after purification by FC [V(SiO<sub>2</sub>) = 50 mL, Cy/EA 95:5 (250 mL), 90:10 (250 mL)] as a colorless oil (572 mg, 58%).

**R<sub>f</sub>** (Cy/EA : 90/10, UV+KMnO<sub>4</sub>): 0.34

**<sup>1</sup>H NMR (400 MHz, CDCl<sub>3</sub>)**: δ 4.20 (q, *J* = 7.2 Hz, 4H), 3.53 (t, *J* = 7.5 Hz, 1H), 2.78–2.71 (m, 2H), 2.02–1.97 (m, 1H), 1.25 (t, *J* = 7.2 Hz, 6H).

**<sup>13</sup>C{<sup>1</sup>H} NMR (100 MHz, CDCl<sub>3</sub>)**: δ 167.9 (2 C), 80.0 (C), 70.5 (CH), 61.8 (2 CH<sub>2</sub>), 51.2 (CH), 18.5 (CH<sub>2</sub>), 14.1 (2 CH<sub>3</sub>).

Compound **3bh**:<sup>9</sup> Following *GPI* performed with diethyl malonate (**1b**, 0.84 mL, 5.5 mmol, 1.1 equiv), sodium hydride (0.20 g, 5.0 mmol, 1.0 equiv), and benzyl bromide (**2h**, 0.59 mL, 5.0 mmol, 1.0 equiv) in DMF (10 mL, *c* = 0.5 M), the desired product **3bh** was obtained after purification by FC [V(SiO<sub>2</sub>) = 50 mL, Cy/EA 95:5 (250 mL), 90:10 (250 mL)] as a colorless oil (959 mg, 76%).

**R<sub>f</sub>** (Cy/EA : 90/10, UV+KMnO<sub>4</sub>): 0.25

**<sup>1</sup>H NMR (400 MHz, CDCl<sub>3</sub>)**: δ 7.33–7.27 (m, 2H), 7.26–7.21 (m, 3H), 4.19 (q, *J* = 7.2 Hz, 4H), 3.67 (t, *J* = 7.9 Hz, 1H), 3.24 (d, *J* = 7.9 Hz, 2H), 1.23 (t, *J* = 7.2 Hz, 6H).

**<sup>13</sup>C{<sup>1</sup>H} NMR (100 MHz, CDCl<sub>3</sub>)**: δ 169.0 (2 C), 138.0 (C), 128.9 (2 CH), 128.6 (2 CH), 126.8 (CH), 61.5 (2 CH<sub>2</sub>), 54.0 (CH), 34.8 (CH<sub>2</sub>), 14.1 (2 CH<sub>3</sub>).

Compound **3bi**:<sup>10</sup> Following *GPI* performed with diethyl malonate (**1b**, 0.46 mL, 3.0 mmol, 1.0 equiv), sodium hydride (0.12 g, 3.0 mmol, 1.0 equiv), and 2-(bromomethyl)thiophene (**2i**, 0.53 g, 3.0 mmol, 1.0 equiv) in DMF (3 mL, *c* = 1 M) for 16 h, the desired product **3bi** was obtained after purification by FC [V(SiO<sub>2</sub>) = 50 mL, Cy/EA 95:5 (500 mL)] as a yellow oil (229 mg, 30%).

**R<sub>f</sub>** (Cy/EA : 80/20, UV+KMnO<sub>4</sub>): 0.53

**<sup>1</sup>H NMR (400 MHz, CDCl<sub>3</sub>)**: δ 7.25–7.21 (m, 1H), 7.03–7.00 (m, 1H), 6.93 (d, *J* = 4.9 Hz, 1H), 4.16 (q, *J* = 7.1 Hz, 4H), 3.63 (t, *J* = 7.8 Hz, 1H), 3.24 (d, *J* = 7.8 Hz, 2H), 1.22 (t, *J* = 7.1 Hz, 6H).

**<sup>13</sup>C{<sup>1</sup>H} NMR (100 MHz, CDCl<sub>3</sub>)**: δ 169.0 (2 C), 138.2 (C), 128.3 (CH), 125.8 (CH), 122.1 (CH), 61.6 (CH<sub>2</sub>), 53.3 (CH<sub>3</sub>), 29.3 (CH<sub>2</sub>), 14.1 (CH<sub>3</sub>).

<sup>5</sup> Ines, B.; Palomas, D.; Holle, S.; Steinberg, S.; Nicasio, J.A.; Alcarazo, M. *Angew. Chem. Int. Ed.* **2012**, *51*, 12367-12369.

<sup>6</sup> Cahiez, G.; Alami, M. *Tetrahedron* **1989**, *45*, 4163-4176.

<sup>7</sup> Yip, K.; Zhu, N.-Y.; Yang, D. *Org. Lett.* **2009**, *11*, 1911-1914.

<sup>8</sup> Czekelius, C.; Hafer, J.; Tonzetich, Z. J.; Schrock, R. R.; Christensen, R. L.; Mueller, P. *J. Am. Chem. Soc.* **2006**, *128*, 16664-16675.

<sup>9</sup> Rotthaus, O.; LeRoy, S.; Tomas, A.; Barkigia, K. M.; Artaud, I. *Eur. J. Inorg. Chem.* **2004**, 1545-1551.

<sup>10</sup> Che, J.; Lam, Y. *Synlett* **2010**, 2415-2420.



Compound **3bj**:<sup>1</sup> Following *GPI* performed with diethyl malonate (**1b**, 0.84 mL, 5.5 mmol, 1.1 equiv), sodium hydride (0.20 g, 5.0 mmol, 1.0 equiv), and 1-bromo-3-chloropropane (**2j**, 0.49 mL, 5.0 mmol, 1.0 equiv) in DMF (10 mL, *c* = 0.5 M) for 16 h, the desired product **3bj** was obtained after purification by FC [V(SiO<sub>2</sub>) = 50 mL, Cy/EA 95:5 (250 mL), 90:10 (250 mL)] as a colorless oil (1.077 g, 91%).

**R<sub>f</sub>** (PE/EA : 90/10, UV+KMnO<sub>4</sub>): 0.48

**<sup>1</sup>H NMR (400 MHz, CDCl<sub>3</sub>)**: δ 4.17 (q, *J* = 7.1 Hz, 4H), 3.51 (t, *J* = 6.5 Hz, 2H), 3.31 (t, *J* = 7.5 Hz, 1H), 2.01 (q, *J* = 7.5 Hz, 2H), 1.84–1.75 (m, 2H), 1.24 (t, 7.1 Hz, 6H).

**<sup>13</sup>C{<sup>1</sup>H} NMR (100 MHz, CDCl<sub>3</sub>)**: δ 169.1 (2 C), 61.5 (2 CH<sub>2</sub>), 51.3 (CH), 44.2 (CH<sub>2</sub>), 30.2 (CH<sub>2</sub>), 26.2 (CH<sub>2</sub>), 14.1 (2 CH<sub>3</sub>).

Compound **3ak**:<sup>11</sup> Following *GPI* performed with dimethyl malonate (**1a**, 0.56 mL, 4.9 mmol, 1.1 equiv), sodium hydride (0.18 g, 4.5 mmol, 1.0 equiv), and *tert*-butyl (2-bromoethyl)carbamate (**2k**, 1.00 g, 4.5 mmol, 1.0 equiv) in DMF (10 mL, *c* = 0.5 M) for 16 h, the desired product **3ak** was obtained after purification by FC [V(SiO<sub>2</sub>) = 50 mL, Cy/EA 90:10 (250 mL), 80:20 (250 mL)] as a colorless oil (507 mg, 41%).

**R<sub>f</sub>** (Cy/EA : 80/20, UV+KMnO<sub>4</sub>): 0.11

**<sup>1</sup>H NMR (400 MHz, CDCl<sub>3</sub>)**: δ 4.68 (br s, 1H), 3.72 (s, 6H), 3.42 (t, *J* = 7.1 Hz, 1H), 3.19 - 3.13 (m, 2H), 2.07 (q, *J* = 6.6 Hz, 2H), 1.40 (s, 9H).

**<sup>13</sup>C{<sup>1</sup>H} NMR (100 MHz, CDCl<sub>3</sub>)**: δ 169.7 (2 C), 155.9 (C), 79.4 (C), 52.7 (2 CH<sub>3</sub>), 49.2 (CH), 38.5 (CH<sub>2</sub>), 29.1 (CH<sub>2</sub>), 28.4 (3 CH<sub>3</sub>).

Compound **3bl**: Following *GPI* performed with diethyl malonate (**1b**, 1.5 mL, 10.0 mmol, 1.0 equiv), sodium hydride (0.40 g, 10.0 mmol, 1.0 equiv), and 2-bromoethyl 4-methylbenzoate (**2l**, 2.431 g, 10.0 mmol, 1.0 equiv) in DMF (10 mL, *c* = 1 M) at 80 °C for 16 h, the desired product **3bl** was obtained after purification by FC [V(SiO<sub>2</sub>) = 100 mL, PE/EA 98:2 (500 mL), 95:5 (250 mL), 90:10 (250 mL), 80/20 (250 mL)] as a colorless oil (1.425 g, 44%).

**R<sub>f</sub>** (PE/EA : 90/10, UV+KMnO<sub>4</sub>): 0.34

**HRMS (ESI<sup>+</sup>)**: [M+Na]<sup>+</sup> Calcd. for C<sub>17</sub>H<sub>22</sub>NaO<sub>6</sub>: 345.1308. Found: 345.1309.

**<sup>1</sup>H NMR (400 MHz, CDCl<sub>3</sub>)**: δ 7.88 (d, *J* = 7.5 Hz, 2H), 7.21 (d, *J* = 7.5 Hz, 2H), 4.35 (t, *J* = 6.1 Hz, 2H), 4.16 (t, *J* = 7.1 Hz, 4H), 3.55 (t, *J* = 7.3 Hz, 1H), 2.52–2.29 (m, 5H), 1.23 (t, *J* = 7.1 Hz, 6H).

**<sup>13</sup>C{<sup>1</sup>H} NMR (100 MHz, CDCl<sub>3</sub>)**: δ 169.0 (2 C), 166.4 (C), 143.8 (C), 129.7 (2 CH), 129.1 (2 CH), 127.3 (C), 62.3 (CH<sub>2</sub>), 61.7 (2 CH<sub>2</sub>), 49.2 (CH), 28.0 (CH<sub>2</sub>), 21.7 (CH<sub>3</sub>), 14.1 (2 CH<sub>3</sub>).

Compound **3bm**: Following *GPI* performed with diethyl malonate (**1b**, 1.67 mL, 11.0 mmol, 1.1 equiv), sodium hydride (0.40 g, 10.0 mmol, 1.0 equiv), and (2-bromoethoxy)(*tert*-butyl)dimethylsilane (**2m**, 2.392 g, 10.0 mmol, 1.0 equiv) in DMF (10 mL, *c* = 1 M) for 16 h, the desired product **3bm** was obtained after purification by FC [V(SiO<sub>2</sub>) = 50 mL, PE/EA 98:2 (250 mL), 95:5 (250 mL)] as a colorless oil (1.655 g, 51%).

**R<sub>f</sub>** (PE/EA : 90/10, UV+KMnO<sub>4</sub>): 0.41

**HRMS (ESI<sup>+</sup>)**: [M+Na]<sup>+</sup> Calcd. for C<sub>15</sub>H<sub>30</sub>NaO<sub>5</sub>Si: 341.1754. Found: 341.1750.

**<sup>1</sup>H NMR (400 MHz, CDCl<sub>3</sub>)**: δ 4.25–4.10 (m, 4H), 3.63 (t, *J* = 6.4 Hz, 2H), 3.56 (t, *J* = 6.4 Hz, 1H), 2.09 (q, *J* = 6.4 Hz, 2H), 1.25 (t, *J* = 7.7 Hz, 6H), 0.86 (s, 9H), 0.01 (s, 6H).

**<sup>13</sup>C{<sup>1</sup>H} NMR (100 MHz, CDCl<sub>3</sub>)**: δ 169.7 (2 C), 61.4 (2 CH<sub>2</sub>), 60.4 (CH<sub>2</sub>), 48.6 (CH), 31.8 (CH<sub>2</sub>), 26.0 (3 CH<sub>3</sub>), 18.4 (C), 14.2 (2 CH<sub>3</sub>). [2 CH<sub>3</sub> not detected]

Compound **3bn**: Following *GPI* performed with diethyl malonate (**1b**, 3.4 mL, 22.0 mmol, 1.1 equiv), sodium hydride (0.98 g, 24.0 mmol, 1.2 equiv), and bromoacetonitrile (**2n**, 1.4 mL, 20.0 mmol, 1.0 equiv) in THF (40 mL), the desired product **3bn** was obtained after purification by FC [V(SiO<sub>2</sub>) = 100 mL, PE/EA 80:20 (500 mL), 70:30 (500 mL)] as a colorless oil (990 mg, 24%).

**R<sub>f</sub>** (PE/EA : 80/20, UV+KMnO<sub>4</sub>): 0.15

**HRMS (ESI<sup>+</sup>)**: [M+H]<sup>+</sup> Calcd. for C<sub>9</sub>H<sub>14</sub>NO<sub>4</sub>: 200.0917. Found: 200.0916.

**<sup>1</sup>H NMR (400 MHz, CDCl<sub>3</sub>)**: δ 4.29–4.20 (m, 4H), 3.68 (t, *J* = 7.3 Hz, 1H), 2.90 (d, *J* = 7.3 Hz, 2H), 1.28 (t, *J* = 7.1 Hz, 6H).

**<sup>13</sup>C{<sup>1</sup>H} NMR (100 MHz, CDCl<sub>3</sub>)**: δ 166.5 (2 C), 116.9 (C), 62.7 (2 CH<sub>2</sub>), 48.1 (CH), 17.0 (CH<sub>2</sub>), 14.0 (2 CH<sub>3</sub>).

Compound **3ao**: Following *GPI* performed with dimethyl malonate (**1a**, 0.47 mL, 4.1 mmol, 1.1 equiv), sodium hydride (0.15 g, 3.7 mmol, 1.0 equiv), and 2-(iodomethyl)-4,4,5,5-tetramethyl-1,3,2-dioxaborolane (**2o**, 1.00 g, 3.7 mmol, 1.0 equiv) in DMF (5 mL, *c* = 1 M), the desired product **3ao** was obtained after purification by FC [V(SiO<sub>2</sub>) = 50 mL, PE/EA 80:20 (250 mL), 60:40 (250 mL)] as a colorless oil (714 mg, 70%).

**R<sub>f</sub>** (PE/EA : 80/20, UV+KMnO<sub>4</sub>): 0.20

**HRMS (ESI<sup>+</sup>)**: [M+H]<sup>+</sup> Calcd. for C<sub>12</sub>H<sub>22</sub>BO<sub>6</sub>: 273.1503. Found: 273.1506.

**<sup>1</sup>H NMR (400 MHz, CDCl<sub>3</sub>)**: δ 3.67 (s, 6H), 3.55 (t, *J* = 8.0 Hz, 1H), 1.27 (d, *J* = 8.0 Hz, 2H), 1.18 (s, 12H).

**<sup>13</sup>C{<sup>1</sup>H} NMR (100 MHz, CDCl<sub>3</sub>)**: δ 171.0 (2 C), 83.6 (2 C), 52.5 (2 CH<sub>2</sub>), 47.4 (CH), 24.7 (4 CH<sub>3</sub>), 11.7 (br CH<sub>2</sub>).

<sup>11</sup> Isaad, J.; Rolla, M.; Bianchini, R. *Eur. J. Org. Chem.* **2009**, 2748-2764.

Compound **3ap**: Following *GP1* performed with dimethyl malonate (**1a**, 0.9 mL, 7.9 mmol, 1.1 equiv), sodium hydride (0.29 g, 7.2 mmol, 1.0 equiv), (chloromethyl)trimethylsilane (**2p**, 1.0 mL, 7.2 mmol, 1.0 equiv) and sodium iodide (3.2 g, 21.5 mmol, 3.0 equiv) in THF (15 mL, *c* = 0.5 M) at reflux for 24 h, the desired product **3ap** was obtained after purification by FC [V(SiO<sub>2</sub>) = 50 mL, Cy/EA 95:5 (250 mL), 90:10 (250 mL)] as a colorless oil (333 mg, 21%).

**R<sub>f</sub>** (PE/EA : 90/10, UV+KMnO<sub>4</sub>): 0.48

**HRMS (ESI<sup>+</sup>)**: [M+Na]<sup>+</sup> Calcd. for C<sub>9</sub>H<sub>18</sub>NaO<sub>4</sub>Si: 241.0866. Found: 241.0866.

**<sup>1</sup>H NMR (400 MHz, CDCl<sub>3</sub>)**: δ 3.71 (s, 6H), 3.38 (t, *J* = 7.9 Hz, 1H), 1.18 (d, *J* = 7.9 Hz, 2H), 0.00 (s, 9H).

**<sup>13</sup>C{<sup>1</sup>H} NMR (100 MHz, CDCl<sub>3</sub>)**: δ 171.2 (2 C), 52.7 (2 CH<sub>3</sub>), 47.6 (CH), 16.3 (CH<sub>2</sub>), -1.54 (3 CH<sub>3</sub>).

### 3. Preparation of substituted malonic acids **9**

*General procedure 2 (GP2) - saponification*: A RBF equipped with a stirring bar was charged with malonate **3** (1.0 equiv) and MeOH (*c* = 2 M). After addition of a 6 M aqueous solution of NaOH (5.0 equiv), the reaction mixture was stirred at 70 °C for 1 h. The resulting mixture was then acidified to pH 1 with 1 M aq HCl, and extracted twice with EA (20 mL). The combined organic layers were dried (Na<sub>2</sub>SO<sub>4</sub>) and evaporated to afford the expected product **9**.

Compound **9a**:<sup>12</sup> Following *GP2* performed with **3aa** (0.40 mL, 3.0 mmol, 1.0 equiv) and NaOH (0.60 g, 15.0 mmol, 5.0 equiv) in MeOH (2.5 mL, *c* = 2 M), the desired product **9a** was obtained as an off-white solid (314 mg, 89%).

**mp**: 136–138 °C (lit.: 131–134 °C)

**<sup>1</sup>H NMR (400 MHz, CD<sub>3</sub>COCD<sub>3</sub>)**: δ 10.42 (br s, 2H), 3.47 (q, *J* = 7.2 Hz, 1H), 1.35 (d, *J* = 7.2 Hz, 3H).

**<sup>13</sup>C{<sup>1</sup>H} NMR (100 MHz, CD<sub>3</sub>COCD<sub>3</sub>)**: δ 171.8 (2 C), 46.1 (CH), 14.0 (CH<sub>3</sub>).

Compound **9c**:<sup>1</sup> Following *GP2* performed with **3ac** (565 mg, 3.0 mmol, 1.0 equiv) and NaOH (0.60 g, 15.0 mmol, 5.0 equiv) in MeOH (2.5 mL, *c* = 2 M), the desired product **9c** was obtained as a white solid (439 mg, 91%).

**mp**: 101–103 °C (lit.: 102–103 °C)

**<sup>1</sup>H NMR (400 MHz, CD<sub>3</sub>SOCD<sub>3</sub>)**: δ 12.62 (br s, 2H), 3.17 (t, *J* = 7.4 Hz, 1H), 1.69 (q, *J* = 7.4 Hz, 2H), 1.36–1.14 (m, 4H), 0.84 (t, *J* = 6.8 Hz, 3H).

**<sup>13</sup>C{<sup>1</sup>H} NMR (100 MHz, CD<sub>3</sub>SOCD<sub>3</sub>)**: δ 171.1 (2 C), 51.7 (CH), 29.2 (CH<sub>2</sub>), 28.3 (CH<sub>2</sub>), 22.1 (CH<sub>2</sub>), 13.9 (CH<sub>3</sub>).

Compound **9d**:<sup>13</sup> Following *GP2* performed with **3bd** (817 mg, 3.0 mmol, 1.0 equiv) and NaOH (0.60 g, 15.0 mmol, 5.0 equiv) in MeOH (2.5 mL, *c* = 2 M), the desired product **9d** was obtained as a white solid (647 mg, quantitative).

**mp**: 110–113 °C (lit.: 113–114 °C)

**<sup>1</sup>H NMR (400 MHz, CD<sub>3</sub>SOCD<sub>3</sub>)**: δ 12.64 (br s, 2H), 3.17 (t, *J* = 7.4 Hz, 1H), 1.68 (q, *J* = 7.4 Hz, 2H), 1.28–1.19 (m, 12H), 0.85 (t, *J* = 6.2 Hz, 3H).

**<sup>13</sup>C{<sup>1</sup>H} NMR (100 MHz, CD<sub>3</sub>SOCD<sub>3</sub>)**: δ 171.0 (2 C), 51.7 (CH), 31.3 (CH<sub>2</sub>), 28.9 (CH<sub>2</sub>), 28.8 (CH<sub>2</sub>), 28.7 (CH<sub>2</sub>), 28.5 (CH<sub>2</sub>), 26.9 (CH<sub>2</sub>), 22.2 (CH<sub>2</sub>), 14.0 (CH<sub>3</sub>).

Compound **9f**:<sup>14</sup> Following *GP2* performed with **3bf** (100 mg, 0.5 mmol, 1.0 equiv) and NaOH (0.10 g, 2.5 mmol, 5.0 equiv) in MeOH (0.4 mL, *c* = 2 M), the desired product **9f** was obtained as a white solid (61 mg, 85%).

**mp**: 101–104 °C (lit.: 102–105 °C)

**<sup>1</sup>H NMR (400 MHz, CD<sub>3</sub>COCD<sub>3</sub>)**: δ 9.90 (br s, 2H), 5.91–5.75 (m, 1H), 5.12 (dd, *J* = 17.1, 3.0 Hz, 1H), 5.02 (dd, *J* = 10.3, 3.0 Hz, 1H), 3.46 (t, *J* = 7.5 Hz, 1H), 2.59 (t, *J* = 7.5 Hz, 2H).

**<sup>13</sup>C{<sup>1</sup>H} NMR (100 MHz, CD<sub>3</sub>COCD<sub>3</sub>)**: δ 170.5 (2 C), 135.7 (CH), 117.4 (CH<sub>2</sub>), 51.8 (CH), 33.6 (CH<sub>2</sub>).

Compound **9h**:<sup>15</sup> Following *GP2* performed with **3bh** (222 mg, 0.89 mmol, 1.0 equiv) and NaOH (0.18 g, 5.0 mmol, 5.0 equiv) in MeOH (0.8 mL, *c* = 2 M), the desired product **9h** was obtained as an off-white solid (151 mg, 87%).

**<sup>1</sup>H NMR (400 MHz, CD<sub>3</sub>COCD<sub>3</sub>)**: δ 9.78 (br s, 2H), 7.34–7.24 (m, 4H), 7.24–7.17 (m, 1H), 3.73 (t, *J* = 7.8 Hz, 1H), 3.19 (d, *J* = 7.8 Hz, 2H).

**<sup>13</sup>C{<sup>1</sup>H} NMR (100 MHz, CD<sub>3</sub>COCD<sub>3</sub>)**: δ 170.4 (2 C), 139.5 (C), 129.7 (2 CH), 129.2 (2 CH), 127.3 (CH), 54.0 (CH), 35.4 (CH<sub>2</sub>).

<sup>12</sup> McErlan, M. *Org. Biomol. Chem.* **2016**, *14*, 1236–1238.

<sup>13</sup> Jayaraman, A.; Mahanthappa, M.K. *Langmuir*, **2018**, *34*, 2290–2301.

<sup>14</sup> Sun, X.G.; Reeder, C. L.; Kerr, J. B. *Macromolecules*, **2004**, *37*, 2219–2227.

<sup>15</sup> Lai, Y.; Sun, L.; Sit, M.K.; Wang, Y.; Dai, W.M. *Tetrahedron*, **2016**, *72*, 664–673.

## 4. Preparation of substituted meldrum acid derivatives 7

Compound **7h**:<sup>16</sup> A flame-dried 100 mL RBF equipped with a stirring bar was charged with meldrum acid (**5**, 1.44 g, 10.0 mmol, 1.0 equiv), closed with a septum, and purged with argon. After the addition of benzaldehyde (**6h**, 1.00 mL, 10.0 mmol, 1.0 equiv) with a syringe, and abs. EtOH (20 mL, *c* = 0.5 M) by quick removal of the septum, the mixture was stirred (by heating with a heat gun, if necessary) until complete solubilization of the solid. Then, piperidine (99  $\mu$ L, 1.0 mmol, 10 mol %) and acetic acid (57  $\mu$ L, 1.0 mmol, 10 mol %) were added through the septum with syringes, and the reaction was stirred at rt for 30 min. NaBH(OAc)<sub>3</sub> (4.24 g, 20.0 mmol, 2.0 equiv) was added in 4 equal portions, one after the other on a 30 min interval by temporary removal of the septum and the reaction was stirred for 60 min at rt. Then, the resulting mixture was quenched with a sat. aq. NH<sub>4</sub>Cl (50 mL) and extracted with DCM (3  $\times$  20 mL). The combined organic layers were dried over Na<sub>2</sub>SO<sub>4</sub> and evaporated. Purification by recrystallization (MeOH/H<sub>2</sub>O) afforded the expected product **7h** as an off-white solid (1.321 g, 56%).

<sup>1</sup>H NMR (400 MHz, CDCl<sub>3</sub>):  $\delta$  7.39–7.22 (m, 5H), 3.79 (t, *J* = 4.7 Hz, 1H), 3.52 (d, *J* = 4.7 Hz, 2H), 1.76 (s, 3H), 1.51 (s, 3H).

<sup>13</sup>C{<sup>1</sup>H} NMR (100 MHz, CDCl<sub>3</sub>):  $\delta$  165.4 (2 C), 137.4 (C), 129.9 (2 CH), 128.8 (2 CH), 127.3 (CH), 105.4 (C), 48.3 (CH), 32.3 (CH<sub>2</sub>), 28.6 (CH<sub>3</sub>), 27.4 (CH<sub>3</sub>).

*General procedure 3 (GP3) - preparation of meldrum acid derivatives:* A RBF equipped with a stirring bar was charged with the malonic acid derivative **9** (1.0 equiv) and Ac<sub>2</sub>O (5–8 M), and cooled to 0 °C (ice/water bath). After the addition of 2–3 drops of concentrated H<sub>2</sub>SO<sub>4</sub>, acetone (1.1 equiv) was added dropwise to the stirred mixture with a pressure-equalizing dropping funnel. The reaction was allowed to warm to room temperature and stirred for 6 h. Then, the resulting mixture was placed in the refrigerator for 2 h, and the resulting solid was collected by filtration on a fritted funnel and rinsed with cold water (2 times) and Et<sub>2</sub>O (3 times). Traces of water were removed by addition of toluene (10 mL) and evaporation (3 times) to afford the desired product **7**.

Compound **7a**:<sup>17</sup> Following GP3 performed with methylmalonic acid **9a** (2.95 g, 25.0 mmol, 1.5 equiv) and acetone (2.0 mL, 27.5 mmol, 1.1 equiv) in Ac<sub>2</sub>O (3.2 mL, *c* = 8.0 M), the desired product **7a** was obtained as a white solid (3.354 g, 84%).

mp: 114–116 °C (lit.: 113–114 °C)

<sup>1</sup>H NMR (400 MHz, CDCl<sub>3</sub>):  $\delta$  3.61 (q, *J* = 7.0 Hz, 1H), 1.80 (s, 3H), 1.74 (s, 3H), 1.54 (d, *J* = 7.0 Hz, 3H).

<sup>13</sup>C{<sup>1</sup>H} NMR (100 MHz, CDCl<sub>3</sub>):  $\delta$  166.2 (2 C), 105.0 (C), 41.4 (CH), 28.6 (CH<sub>3</sub>), 26.5 (CH<sub>3</sub>), 10.8 (CH<sub>3</sub>).

Compound **7s**:<sup>18</sup> Following GP3 performed with phenylmalonic acid **9s** (4.50 g, 25.0 mmol, 1.5 equiv) and acetone (2.0 mL, 27.5 mmol, 1.1 equiv) in Ac<sub>2</sub>O (5.0 mL, *c* = 5.0 M), the desired product **7s** was obtained as a pale yellow solid (4.690 g, 84%).

mp: 135–138 °C (lit.: 135–137 °C)

<sup>1</sup>H NMR (400 MHz, CDCl<sub>3</sub>):  $\delta$  7.50–7.39 (m, 3H), 7.37–7.24 (m, 2H), 4.82 (s, 1H), 1.88 (s, 3H), 1.78 (s, 3H).

<sup>13</sup>C{<sup>1</sup>H} NMR (100 MHz, CDCl<sub>3</sub>):  $\delta$  164.9 (2 C), 130.7 (C), 129.3 (2 CH), 129.2 (2 CH), 128.9 (CH), 105.9 (C), 52.9 (CH), 28.6 (CH<sub>3</sub>), 27.5 (CH<sub>3</sub>).

## 5. Preparation of SMAHOs 4

*General procedure 4 (GP4) - monosaponification:* In a manner similar to <sup>19</sup>, a RBF equipped with a stirring bar was charged with the malonate derivative **3** (1.0 equiv) and the solvent (*c* = 0.5 M, V mL). A 5 M aqueous solution of KOH (1.0 equiv) was added with a syringe and the reaction mixture was stirred at rt for 2 h. Then, the mixture was concentrated, diluted with water (V mL), and the resulting aqueous layer was washed with Et<sub>2</sub>O (3\*V/4 mL), acidified to pH 1 by the addition of 1 M aq HCl, saturated with NaCl, and extracted with EA (3\*V/4 mL). The combined organic layers were dried (Na<sub>2</sub>SO<sub>4</sub>) and evaporated to afford the expected product **4**.

Compound **4aa**:<sup>20</sup> Following GP4 performed with **3aa** (6.70 mL, 50.0 mmol, 1.0 equiv) and potassium hydroxide (3.37 g, 60.0 mmol, 1.2 equiv) in MeOH (100 mL), the desired product **4aa** was obtained as a colorless oil (6.011 g, 91%).

Characterization data are in agreement with those reported in <sup>19</sup>.

Compound **4ba**:<sup>20</sup> Following GP4 performed with **3ba** (3.00 g, 17.2 mmol, 1.0 equiv) and potassium hydroxide (0.96 g, 17.2 mmol, 1.0 equiv) in EtOH (34 mL), the desired product **4ba** was obtained as a colorless oil (1.818 g, 72%).

<sup>1</sup>H NMR (400 MHz, CDCl<sub>3</sub>):  $\delta$  10.15 (br s, 1H), 4.18 (q, *J* = 7.1 Hz, 2H), 3.45 (q, *J* = 7.4 Hz, 1H), 1.41 (d, *J* = 7.4 Hz, 3H), 1.25 (t, *J* = 7.1 Hz, 3H).

<sup>13</sup>C{<sup>1</sup>H} NMR (100 MHz, CDCl<sub>3</sub>):  $\delta$  175.9 (C), 170.1 (C), 61.9 (CH<sub>2</sub>), 46.1 (CH), 14.0 (CH<sub>3</sub>), 13.6 (CH<sub>3</sub>).

<sup>16</sup> Fillion, E.; Wilsily, A.; Fishlock, D. *J. Org. Chem.* **2009**, *74*, 1259–1267.

<sup>17</sup> Nikolaev, V. A.; Shevchenko, V. V.; Platz, M. S.; Khimich, N. N. *Russ. J. Org. Chem.* **2006**, *42*, 815–827.

<sup>18</sup> Szostak, M.; Lyons, S. E.; Spain, M.; Procter, D. J. *Chem. Commun.* **2014**, *50*, 8391–8394.

<sup>19</sup> Xavier, T.; Condon, S.; Pichon, C.; Le Gall, E.; Presset, M. *J. Org. Chem.*, **2021**, *86*, 5452–5462.

<sup>20</sup> Niwayama, S.; Cho, H.; Lin, C. *Tetrahedron Lett.* **2008**, *49*, 4434–4436.

Compound **4ab**:<sup>21</sup> Following *GP4* performed with **3ab** (1.28 g, 8.0 mmol, 1.0 equiv) and potassium hydroxide (0.54 g, 10.0 mmol, 1.2 equiv) in MeOH (15 mL), the desired product **4ab** was obtained as a colorless oil (1.052 g, 90%).

**<sup>1</sup>H NMR (400 MHz, CDCl<sub>3</sub>)**: δ 10.62 (br s, 1H), 3.75 (s, 3H), 3.32 (t, *J* = 7.4 Hz, 1H), 1.95 (quint, *J* = 7.4 Hz, 2H), 0.98 (t, *J* = 7.4 Hz, 3H).

**<sup>13</sup>C{<sup>1</sup>H} NMR (100 MHz, CDCl<sub>3</sub>)**: δ 175.4 (C), 169.8 (C), 53.2 (CH), 52.8 (CH<sub>3</sub>), 22.4 (CH<sub>2</sub>), 11.9 (CH<sub>3</sub>).

Compound **4ac**:<sup>22</sup> Following *GP4* performed with **3ac** (1.02 g, 6.4 mmol, 1.0 equiv) and potassium hydroxide (0.43 g, 7.7 mmol, 1.2 equiv) in MeOH (11 mL), the desired product **4ac** was obtained as a colorless oil (0.871 g, 78%).

*Characterization data are in agreement with those reported in 19.*

Compound **4bd**:<sup>23</sup> Following *GP4* performed with **3bd** (5.50 g, 20.2 mmol, 1.0 equiv) and potassium hydroxide (1.13 g, 20.2 mmol, 1.0 equiv) in EtOH (40 mL), the desired product **4bd** was obtained as a colorless oil (3.560 g, 72%).

*Characterization data are in agreement with those reported in 19.*

Compound **4be**: Following *GP4* performed with **3be** (2.70 g, 13.3 mmol, 1.0 equiv) and potassium hydroxide (0.75 g, 13.3 mmol, 1.0 equiv) in EtOH (27 mL), the desired product **4be** was obtained as a colorless oil (1.716 g, 74%).

**HRMS (ESI<sup>+</sup>)**: *m/z* [M+Na]<sup>+</sup> Calcd. for C<sub>8</sub>H<sub>14</sub>NaO<sub>4</sub>: 197.0784. Found: 197.0783.

**<sup>1</sup>H NMR (400 MHz, CDCl<sub>3</sub>)**: δ 10.76 (br s, 1H), 4.19 (q, *J* = 7.1 Hz, 2H), 3.15 (d, *J* = 8.3 Hz, 1H), 2.37 (m, 1H), 1.26 (t, *J* = 7.1 Hz, 3H), 1.01 (t, *J* = 7.4 Hz, 6H).

**<sup>13</sup>C{<sup>1</sup>H} NMR (100 MHz, CDCl<sub>3</sub>)**: δ 174.6 (C), 169.1 (C), 61.7 (CH<sub>2</sub>), 58.7 (CH), 29.1 (CH), 20.4 (CH<sub>3</sub>), 20.3 (CH<sub>3</sub>), 14.1 (CH<sub>3</sub>).

Compound **4bf**: Following *GP4* performed with **3bf** (0.98 g, 4.9 mmol, 1.0 equiv) and potassium hydroxide (0.27 g, 4.9 mmol, 1.0 equiv) in EtOH (10 mL), the desired product **4bf** was obtained as a colorless oil (0.603 g, 71%).

*Characterization data are in agreement with those reported in 19.*

Compound **4bg**:<sup>24</sup> Following *GP4* performed with **3bg** (1.70 g, 8.6 mmol, 1.0 equiv) and potassium hydroxide (0.48 g, 8.6 mmol, 1.0 equiv) in EtOH (18 mL), the desired product **4bg** was obtained as a colorless oil (0.963 g, 65%).

*Characterization data are in agreement with those reported in 19.*

Compound **4bh**: Following *GP4* performed with **3bh** (1.07 g, 4.3 mmol, 1.0 equiv) and potassium hydroxide (0.24 g, 4.3 mmol, 1.0 equiv) in EtOH (10 mL), the desired product **4bh** was obtained as a colorless oil (0.657 g, 69%).

*Characterization data are in agreement with those reported in 19.*

Compound **4bi**:<sup>25</sup> Following *GP4* performed with **3bi** (0.19 g, 0.73 mmol, 1.0 equiv) and potassium hydroxide (49 mg, 0.88 mmol, 1.2 equiv) in EtOH (2 mL), the desired product **4bi** was obtained as a colorless oil (0.118 g, 71%).

**<sup>1</sup>H NMR (400 MHz, CDCl<sub>3</sub>)**: δ 9.03 (br s, 1H), 7.40–7.19 (m, 1H), 7.06 (m, 1H), 6.97 (d, *J* = 4.9 Hz, 1H), 4.21 (q, *J* = 7.2 Hz, 2H), 3.73 (t, *J* = 7.6 Hz, 1H), 3.29 (d, *J* = 7.6 Hz, 2H), 1.24 (t, *J* = 7.2 Hz, 3H).

**<sup>13</sup>C{<sup>1</sup>H} NMR (100 MHz, CDCl<sub>3</sub>)**: δ 174.1 (C), 168.8 (C), 137.7 (C), 128.1 (CH), 125.9 (CH), 122.2 (CH), 62.0 (CH<sub>2</sub>), 53.0 (CH), 29.2 (CH<sub>2</sub>), 14.0 (CH<sub>3</sub>).

Compound **4bj**: Following *GP4* performed with **3bj** (1.62 g, 6.8 mmol, 1.0 equiv) and potassium hydroxide (0.38 g, 6.8 mmol, 1.0 equiv) in EtOH (14 mL), the desired product **4bj** was obtained as a colorless oil (0.890 g, 62%).

**HRMS (ESI<sup>+</sup>)**: *m/z* [M+Na]<sup>+</sup> Calcd. for C<sub>8</sub>H<sub>13</sub>NaO<sub>4</sub>: 231.0394. Found: 231.0391.

**<sup>1</sup>H NMR (400 MHz, CDCl<sub>3</sub>)**: δ 10.05 (br s, 1H), 4.22 (q, *J* = 7.1 Hz, 2H), 3.54 (t, *J* = 6.4 Hz, 2H), 3.40 (t, *J* = 7.4 Hz, 1H), 2.11–2.02 (m, 2H), 1.89–1.79 (m, 2H), 1.27 (t, *J* = 7.1 Hz, 3H).

**<sup>13</sup>C{<sup>1</sup>H} NMR (100 MHz, CDCl<sub>3</sub>)**: δ 174.8 (C), 169.0 (C), 62.0 (CH<sub>2</sub>), 51.1 (CH), 44.2 (CH<sub>2</sub>), 30.1 (CH<sub>2</sub>), 26.2 (CH<sub>2</sub>), 14.1 (CH<sub>3</sub>).

Compound **4ak**: Following *GP4* performed with **3ak** (0.50 g, 1.8 mmol, 1.0 equiv) and potassium hydroxide (0.10 g, 1.8 mmol, 1.0 equiv) in MeOH (5 mL), the desired product **4ak** was obtained as a colorless oil (0.366 g, 76%).

<sup>21</sup> Krumme, D.; Tschesche, H. *Tetrahedron* **1999**, *55*, 3007-3018.

<sup>22</sup> Nakagawa, A.; Ohno, H.; Miyano, K.; Omura, S. *J. Org. Chem.* **1980**, *45*, 3268-3274.

<sup>23</sup> Volonterio, A.; Zanda, M. *J. Org. Chem.* **2008**, *73*, 7486-7497.

<sup>24</sup> Aleman, J.; del Solar, V.; Martin-Santos, C.; Cubo, L.; Ranninger, C. N. *J. Org. Chem.* **2011**, *76*, 7287-7293.

<sup>25</sup> Keenan, R. M.; Weinstock, J.; Finkelstein, J. A.; Franz, R. G.; Gaitanopoulos, D. E.; Girard, G. R.; Hill, D. T.; Morgan, T. M.; Samanen, J. M.; Peishoff, C. E.; Tucker, L. M.; Aiyar, N.; Griffin, E.; Ohlstein, E. H.; Stack, E. J.; Weidley, E. F.; Edwards, R. M. *J. Med. Chem.* **1993**, *36*, 1880-1892.

**HRMS (ESI<sup>+</sup>):** [M+K]<sup>+</sup> Calcd. for C<sub>11</sub>H<sub>19</sub>KNO<sub>6</sub>: 300.0843. Found: 300.0843.

**<sup>1</sup>H NMR (400 MHz, CD<sub>3</sub>COCD<sub>3</sub>):** δ 6.09 (br s, 1H), 3.71 (s, 3H), 3.48 (t, *J* = 7.2 Hz, 1H), 3.16 (q, *J* = 6.4 Hz, 2H), 2.10–2.06 (m, 2H), 1.40 (s, 9H). [CO<sub>2</sub>H not detected]

**<sup>13</sup>C{<sup>1</sup>H} NMR (100 MHz, CD<sub>3</sub>COCD<sub>3</sub>):** δ 170.5 (C), 170.4 (C), 156.7 (C), 78.6 (C), 52.4 (CH<sub>3</sub>), 49.5 (CH), 38.9 (CH<sub>2</sub>), 30.5 (CH<sub>2</sub>), 28.5 (3 CH<sub>3</sub>).

Compound **4bl**: Following *GP4* performed with **3bl** (1.40 g, 4.4 mmol, 1.0 equiv) and potassium hydroxide (0.30 g, 5.3 mmol, 1.2 equiv) in EtOH (9 mL), the desired product **4bl** was obtained as a colorless oil (0.825 g, 63%).

*Characterization data are in agreement with those reported in 19.*

Compound **4bm**: Following *GP4* performed with **3bm** (0.98 g, 3.1 mmol, 1.0 equiv) and potassium hydroxide (0.21 g, 3.7 mmol, 1.2 equiv) in EtOH (6 mL), the desired product **4bm** was obtained as a colorless oil (0.633 g, 70%).

**HRMS (ESI<sup>+</sup>):** [M+Na]<sup>+</sup> Calcd. for C<sub>13</sub>H<sub>26</sub>NaO<sub>5</sub>Si: 313.1442. Found: 313.1444.

**<sup>1</sup>H NMR (400 MHz, CDCl<sub>3</sub>):** δ 9.30 (br s, 1H), 4.20 (q, *J* = 7.0 Hz, 2H), 3.75–3.61 (m, 2H), 3.61 (t, *J* = 6.6 Hz, 1H), 2.13 (q, *J* = 6.0 Hz, 2H), 1.27 (t, *J* = 7.0 Hz, 3H), 0.87 (s, 9H), 0.02 (s, 6H).

**<sup>13</sup>C{<sup>1</sup>H} NMR (100 MHz, CDCl<sub>3</sub>):** δ 175.1 (C), 169.5 (C), 61.8 (CH<sub>2</sub>), 60.4 (CH<sub>2</sub>), 48.6 (CH), 31.7 (CH<sub>2</sub>), 26.0 (3 CH<sub>3</sub>), 18.4 (C), 14.1 (CH<sub>3</sub>). [2 CH<sub>3</sub> not detected]

Compound **4bn**: Following *GP4* performed with **3bn** (0.94 g, 4.7 mmol, 1.0 equiv) and potassium hydroxide (0.26 g, 4.7 mmol, 1.0 equiv) in EtOH (20 mL), the desired product **4bn** was obtained as a colorless oil (0.528 g, 65%).

**HRMS (ESI<sup>+</sup>):** [M+Na]<sup>+</sup> Calcd. for C<sub>7</sub>H<sub>9</sub>NNaO<sub>4</sub>: 194.0424. Found: 194.0428.

**<sup>1</sup>H NMR (400 MHz, CDCl<sub>3</sub>):** δ 9.31 (br s, 1H), 4.30 (q, *J* = 7.1 Hz, 2H), 3.78 (t, *J* = 7.3 Hz, 1H), 2.94 (d, *J* = 7.3 Hz, 2H), 1.32 (t, *J* = 7.1 Hz, 3H).

**<sup>13</sup>C{<sup>1</sup>H} NMR (100 MHz, CDCl<sub>3</sub>):** δ 170.8 (C), 166.5 (C), 116.8 (C), 63.2 (CH<sub>2</sub>), 47.9 (CH), 17.0 (CH<sub>2</sub>), 14.0 (CH<sub>3</sub>).

Compound **4ao**: Following *GP4* performed with **3ao** (0.41 g, 1.5 mmol, 1.0 equiv) and potassium hydroxide (0.10 g, 1.8 mmol, 1.2 equiv) in MeOH (3 mL), the desired product **4ao** was obtained as a colorless oil (0.300 g, 77%).

**HRMS (ESI<sup>+</sup>):** [M+Na]<sup>+</sup> Calcd. for C<sub>11</sub>H<sub>19</sub>BNaO<sub>6</sub>: 281.1167. Found: 281.1165.

**<sup>1</sup>H NMR (400 MHz, CDCl<sub>3</sub>):** δ 7.62 (br s, 1H), 3.72 (s, 3H), 3.61 (t, *J* = 7.9 Hz, 1H), 1.32 (d, *J* = 7.9 Hz, 2H), 1.20 (s, 12H).

**<sup>13</sup>C{<sup>1</sup>H} NMR (100 MHz, CDCl<sub>3</sub>):** δ 175.5 (C), 170.9 (C), 83.9 (2 C), 52.7 (CH<sub>3</sub>), 47.4 (CH), 24.7 (4 CH<sub>3</sub>), 11.5 (CH<sub>2</sub>).

Compound **4ap**: Following *GP4* performed with **3ap** (92 mg, 0.57 mmol, 1.0 equiv) and potassium hydroxide (39 mg, 0.69 mmol, 1.2 equiv) in MeOH (2 mL), the desired product **4ap** was obtained as a colorless oil (73 mg, 62%).

**HRMS (ESI<sup>+</sup>):** [M+Na]<sup>+</sup> Calcd. for C<sub>8</sub>H<sub>16</sub>NaO<sub>4</sub>Si: 227.0710. Found: 227.0713.

**<sup>1</sup>H NMR (400 MHz, CDCl<sub>3</sub>):** δ 10.16 (br s, 1H), 3.73 (s, 3H), 3.40 (t, *J* = 7.8 Hz, 1H), 1.18 (t, *J* = 7.8 Hz, 2H), 0.01 (s, 9H).

**<sup>13</sup>C{<sup>1</sup>H} NMR (100 MHz, CDCl<sub>3</sub>):** δ 176.7 (C), 170.8 (C), 52.8 (CH<sub>3</sub>), 47.6 (CH), 16.2 (CH<sub>2</sub>), -1.54 (3 CH<sub>3</sub>).

Compound **4aq**: Following *GP4* performed with dimethyl chloromalonate **3aq** (2.5 mL, 20.0 mmol, 1.0 equiv) and potassium hydroxide (1.12 g, 20.0 mmol, 1.0 equiv) in MeOH (40 mL), the desired product **4aq** was obtained as a colorless oil (2.160 g, 70%).

**HRMS (ESI<sup>+</sup>):** *m/z* [M+Na]<sup>+</sup> Calcd. for C<sub>4</sub>H<sub>5</sub>NaO<sub>4</sub>: 174.9768. Found: 174.9768.

**<sup>1</sup>H NMR (400 MHz, CDCl<sub>3</sub>):** δ 11.17 (br s, 1H), 4.95 (s, 1H), 3.86 (s, 3H).

**<sup>13</sup>C{<sup>1</sup>H} NMR (100 MHz, CDCl<sub>3</sub>):** δ 169.6 (C), 164.9 (C), 54.9 (CH), 54.3 (CH<sub>3</sub>).

Compound **4br**: Following *GP4* performed with diethyl bromomalonate **3br** (1.7 mL, 10.0 mmol, 1.0 equiv) and potassium hydroxide (0.56 g, 10.0 mmol, 1.0 equiv) in EtOH (20 mL), the desired product **4br** was obtained as a colorless oil (1.001 g, 47%).

**HRMS (ESI<sup>+</sup>):** *m/z* [M+Na]<sup>+</sup> Calcd. for C<sub>5</sub>H<sub>7</sub>BrNaO<sub>4</sub>: 232.9419. Found: 232.9418.

**<sup>1</sup>H NMR (400 MHz, CDCl<sub>3</sub>):** δ 10.66 (br s, 1H), 4.91 (s, 1H), 4.34 (q, *J* = 7.1 Hz, 2H), 1.35 (t, *J* = 7.1 Hz, 3H).

**<sup>13</sup>C{<sup>1</sup>H} NMR (100 MHz, CDCl<sub>3</sub>):** δ 169.8 (C), 164.7 (C), 63.9 (CH<sub>2</sub>), 41.4 (CH), 13.9 (CH<sub>3</sub>).

*General procedure 5 (GP5) - monoesterification:* A 50 mL RBF equipped with a stirring bar was charged with the methyl malonic acid (**9a**, 0.50 g, 4.2 mmol, 1.0 equiv), DMAP (26 mg, 0.21 mmol, 5 mol %), CH<sub>3</sub>CN (10 mL), and the requisite alcohol **8** (1.1 equiv) and cooled at -15 °C (ice/salt bath). A solution of DCC (0.87 g, 4.2 mmol, 1.0 equiv) in CH<sub>3</sub>CN (10 mL) was added dropwise to the stirred mixture with a pressure-equalizing dropping funnel. The reaction was allowed to warm to rt and stirred for 14 h. Then, the reaction mixture was filtered through a fritted funnel (rinsed with CH<sub>2</sub>Cl<sub>2</sub>), and the filtrate was evaporated. To the resulting crude oil were added 30 mL of sat aq NaHCO<sub>3</sub>. The resulting solution was washed with Et<sub>2</sub>O (2 × 10 mL), acidified to pH 1 with 1 M aq HCl, and extracted with CH<sub>2</sub>Cl<sub>2</sub> (2 × 20 mL). The combined organic layers were dried (Na<sub>2</sub>SO<sub>4</sub>) and evaporated to afford the expected product **4**.

Compound **4ca**: Following *GP5* performed with isopropanol (**8c**, 0.35 mL, 4.6 mmol, 1.1 equiv), the desired product **4ca** was obtained as a colorless oil (0.341 g, 51%).

**HRMS (ESI<sup>+</sup>)**: [M+Na]<sup>+</sup> Calcd. for C<sub>7</sub>H<sub>12</sub>NaO<sub>4</sub>: 183.0627. Found: 183.0633.

**<sup>1</sup>H NMR (400 MHz, CDCl<sub>3</sub>)**: δ 9.80 (br s, 1H), 5.03 (hept, *J* = 6.5 Hz, 1H), 3.42 (q, *J* = 7.3 Hz, 1H), 1.40 (d, *J* = 7.3 Hz, 3H), 1.22 (d, *J* = 6.5 Hz, 6H).

**<sup>13</sup>C{<sup>1</sup>H} NMR (100 MHz, CDCl<sub>3</sub>)**: δ 175.9 (C), 169.7 (C), 69.5 (CH), 46.2 (CH), 21.6 (CH<sub>3</sub>), 21.5 (CH<sub>3</sub>), 13.5 (CH<sub>3</sub>).

Compound **4da**: Following *GP5* performed with benzyl alcohol (**8d**, 0.48 mL, 4.6 mmol, 1.1 equiv), the desired product **4da** was obtained as a colorless oil (0.462 g, 53%).

*Characterization data are in agreement with those reported in 19.*

Compound **4fa**: Following *GP5* performed with allyl alcohol (**8f**, 0.31 mL, 4.6 mmol, 1.1 equiv), the desired product **4fa** was obtained as a colorless oil (0.345 g, 52%).

**HRMS (ESI<sup>+</sup>)**: [M+Na]<sup>+</sup> Calcd. for C<sub>7</sub>H<sub>10</sub>NaO<sub>4</sub>: 181.0471. Found: 181.0477.

**<sup>1</sup>H NMR (400 MHz, CDCl<sub>3</sub>)**: δ 11.01 (br s, 1H), 5.89 (ddt, *J* = 16.2, 10.6, 5.7 Hz, 1H), 5.31 (dt, *J* = 16.2, 1.6 Hz, 1H), 5.27–5.18 (m, 1H), 4.63 (d, *J* = 5.7 Hz, 2H), 3.51 (q, *J* = 7.3 Hz, 1H), 1.44 (d, *J* = 7.3 Hz, 3H).

**<sup>13</sup>C{<sup>1</sup>H} NMR (100 MHz, CDCl<sub>3</sub>)**: δ 176.1 (C), 169.6 (C), 131.5 (CH), 118.8 (CH<sub>2</sub>), 66.3 (CH<sub>2</sub>), 46.04 (CH), 13.6 (CH<sub>3</sub>).

Compound **4ga**:<sup>26</sup> Following *GP5* performed with *tert*-butanol **8g** (0.44 mL, 4.6 mmol, 1.1 equiv), the desired product **4ga** was obtained as a colorless oil (0.271 g, 37%).

**<sup>1</sup>H NMR (400 MHz, CDCl<sub>3</sub>)**: δ 10.90 (br s, 1H), 3.37 (q, *J* = 7.3 Hz, 1H), 1.44 (s, 9H), 1.38 (d, *J* = 7.3 Hz, 3H).

**<sup>13</sup>C{<sup>1</sup>H} NMR (100 MHz, CDCl<sub>3</sub>)**: δ 176.5 (C), 169.3 (C), 82.4 (C), 47.0 (CH), 27.9 (3 CH<sub>3</sub>), 13.7 (CH<sub>3</sub>).

Compound **4ha**: Following *GP5* performed with 2,2,2-trifluoroethanol (**8h**, 0.33 mL, 4.6 mmol, 1.1 equiv), the desired product **4ha** was obtained as a colorless oil (0.285 g, 34%).

**HRMS (ESI<sup>+</sup>)**: [M+Na]<sup>+</sup> Calcd. for C<sub>6</sub>H<sub>7</sub>F<sub>3</sub>NaO<sub>4</sub>: 223.0188. Found: 223.0189.

**<sup>1</sup>H NMR (400 MHz, CDCl<sub>3</sub>)**: δ 10.51 (br s, 1H), 4.59–4.49 (m, 2H), 3.62 (q, *J* = 7.2 Hz, 1H), 1.51 (d, *J* = 7.2 Hz, 3H).

**<sup>13</sup>C{<sup>1</sup>H} NMR (100 MHz, CDCl<sub>3</sub>)**: δ 175.4 (C), 168.3 (C), 122.7 (q, <sup>1</sup>*J*<sub>C-F</sub> = 277.3 Hz, CF<sub>3</sub>), 61.2 (q, <sup>2</sup>*J*<sub>C-F</sub> = 37.0 Hz, CH<sub>2</sub>), 45.7 (CH), 13.5 (CH<sub>3</sub>).

**<sup>19</sup>F{<sup>1</sup>H} NMR (377 MHz, CDCl<sub>3</sub>)**: δ –73.8 (s, 3 F).

Compound **4ea**:<sup>27</sup> Following *GP5* performed with (–)-menthol (**8e**, 722 mg, 4.6 mmol, 1.1 equiv), the desired product **4ea** was obtained as a colorless oil (0.297 g, 28%).

**<sup>1</sup>H NMR (400 MHz, CDCl<sub>3</sub>)**: (2 diastereomers) δ 9.94 (br s, 2H), 4.76–4.66 (m, 2H), 3.51–3.40 (m, 2H), 2.06–1.95 (m, 2H), 1.92–1.79 (m, 2H), 1.72–1.62 (m, 4H), 1.53–1.35 (m, 10H), 1.12–0.92 (m, 4H), 0.93–0.82 (m, 14H), 0.78–0.68 (m, 6H).

**<sup>13</sup>C{<sup>1</sup>H} NMR (100 MHz, CDCl<sub>3</sub>)**: (2 diastereomers) δ 176.2 (C), 176.1 (C), 169.7 (C), 169.6 (C), 76.0 (CH), 76.0 (CH), 47.0 (CH), 47.0 (CH), 46.3 (CH), 46.3 (CH), 40.6 (CH<sub>2</sub>), 40.4 (CH<sub>2</sub>), 34.3 (2 CH<sub>2</sub>), 31.5 (2 CH), 26.3 (CH), 26.1 (CH), 23.4 (CH<sub>2</sub>), 23.4 (CH<sub>2</sub>), 22.1 (2 CH<sub>3</sub>), 20.8 (2 CH<sub>3</sub>), 16.3 (CH<sub>3</sub>), 16.1 (CH<sub>3</sub>), 13.8 (CH<sub>3</sub>), 13.7 (CH<sub>3</sub>).

Compound **4ia**: Following *GP5* performed with phenol (**8i**, 440 mg, 4.6 mmol, 1.1 equiv), the desired product **4ia** was obtained as a colorless oil (0.136 g, 17%).

**HRMS (ESI<sup>+</sup>)**: [M+Na]<sup>+</sup> Calcd. for C<sub>10</sub>H<sub>10</sub>NaO<sub>4</sub>: 217.0471. Found: 217.0471.

**<sup>1</sup>H NMR (400 MHz, CDCl<sub>3</sub>)**: δ 10.92 (br s, 1H), 7.40 (t, *J* = 7.3 Hz, 2H), 7.26 (t, *J* = 7.3 Hz, 1H), 7.13 (d, *J* = 8.0 Hz, 2H), 3.77 (q, *J* = 7.2 Hz, 1H), 1.61 (d, *J* = 7.2 Hz, 3H).

**<sup>13</sup>C{<sup>1</sup>H} NMR (100 MHz, CDCl<sub>3</sub>)**: δ 176.1 (C), 168.4 (C), 150.5 (C), 129.6 (2 CH), 126.3 (CH), 121.4 (2 CH), 46.2 (CH), 13.6 (CH<sub>3</sub>).

Compound **4ja**: Following *GP5* performed with (+)-citronellol (**8j**, 0.85 mL, 4.6 mmol, 1.1 equiv), the desired product **4ja** was obtained as a pale yellow oil (0.625 g, 58%).

**HRMS (ESI<sup>+</sup>)**: [M+H]<sup>+</sup> Calcd. for C<sub>14</sub>H<sub>25</sub>O<sub>4</sub>: 257.1747. Found: 257.1750.

**<sup>1</sup>H NMR (400 MHz, CDCl<sub>3</sub>)**: δ 9.20 (br s, 1H), 5.07 (t, *J* = 6.4 Hz, 1H), 4.19 (br s, 2H), 3.47 (q, *J* = 7.3 Hz, 1H), 2.00–1.92 (m, 2H), 1.71–1.66 (m, 1H), 1.67 (s, 3H), 1.59 (s, 3H), 1.56–1.40 (m, 2H), 1.44 (d, *J* = 7.3 Hz, 3H), 1.37–1.14 (m, 2H), 0.90 (d, *J* = 6.4 Hz, 3H).

**<sup>13</sup>C{<sup>1</sup>H} NMR (100 MHz, CDCl<sub>3</sub>)**: δ 175.9 (C), 170.1 (C), 131.5 (C), 124.6 (CH), 66.4 (CH<sub>2</sub>), 46.1 (CH), 37.0 (CH<sub>2</sub>), 35.3 (CH<sub>2</sub>), 29.5 (CH), 25.8 (CH<sub>3</sub>), 25.5 (CH<sub>2</sub>), 19.4 (CH<sub>3</sub>), 17.8 (CH<sub>3</sub>), 13.7 (CH<sub>3</sub>).

<sup>26</sup> Park, C.; Ha, M.W.; Kim, B.; Hong, S.; Kim, D.; Park, Y.; Kim, M.H.; Lee, J. K.; Lee, J.; Park, H.G. *Adv. Synth. Catal.* **2015**, 357, 2841–2848.

<sup>27</sup> Ihara, M.; Takahashi, M.; Taniguchi, N.; Yasui, K.; Fukumoto, K.; Kametani, T *J. Chem. Soc., Perkin Trans. 1*, **1989**, 897–903.

Compound **4ka**: Following *GP5* performed with (*S*)-ethyl lactate (**8k**, 0.58 mL, 4.6 mmol, 1.1 equiv), the desired product **4ka** was obtained as a colorless oil (0.298 g, 32%).

**HRMS (ESI<sup>+</sup>)**: [M+H]<sup>+</sup> Calcd. for C<sub>9</sub>H<sub>15</sub>O<sub>6</sub>: 219.0863. Found: 219.0864.

**<sup>1</sup>H NMR (400 MHz, CDCl<sub>3</sub>)**: (2 diastereomers) δ 7.51 (br s, 2H), 5.12 (q, *J* = 7.0 Hz, 2H), 4.19 (q, *J* = 7.1 Hz, 4H), 3.62–3.51 (m, 2H), 1.50 (d, *J* = 7.2 Hz, 6H), 1.47 (d, *J* = 7.4 Hz, 6H), 1.26 (t, *J* = 7.1 Hz, 6H).

**<sup>13</sup>C{<sup>1</sup>H} NMR (100 MHz, CDCl<sub>3</sub>)**: (2 diastereomers) δ 174.9 (C), 174.6 (C), 170.6 (C), 170.5 (C), 169.6 (C), 169.4 (C), 69.7 (CH), 69.7 (CH), 61.7 (CH<sub>2</sub>), 61.7 (CH<sub>2</sub>), 46.0 (CH), 45.7 (CH), 16.8 (2 CH<sub>3</sub>), 14.1 (CH<sub>3</sub>), 14.1 (CH<sub>3</sub>), 13.7 (CH<sub>3</sub>), 13.6 (CH<sub>3</sub>).

*General procedure 6 (GP6) - opening of meldrum acid derivatives*: In a manner similar to <sup>19</sup>, a RBF equipped with a stirring bar was charged with the substituted meldrum acid **7** (1.0 equiv), the alcohol **8** (1.0 equiv), and toluene (*c* = 0.25 M). The reaction mixture was stirred at reflux for 4 h (or at 80 °C for 24 h). Then, the mixture was diluted with Et<sub>2</sub>O (20 mL), and the resulting organic layer was extracted with saturated aqueous NaHCO<sub>3</sub> (2 times). The combined aqueous layers were cooled to 0 °C (ice/water bath) and acidified to pH 1 with 1 M aq HCl, saturated with NaCl, and extracted with Et<sub>2</sub>O (3 × 20 mL). The combined organic layers were dried (Na<sub>2</sub>SO<sub>4</sub>) and evaporated to afford the expected product **4**.

Compound **4ch**: Following *GP6* performed with **7h** (0.50 g, 2.1 mmol, 1.0 equiv) and propan-2-ol (**8c**, 0.19 mL, 2.5 mmol, 1.0 equiv) in toluene at 80 °C for 24 h, the desired product **4ch** was obtained as a pale yellow oil (0.462 g, 93%).

**HRMS (ESI<sup>+</sup>)**: *m/z* [M+Na]<sup>+</sup> Calcd. for C<sub>13</sub>H<sub>16</sub>NaO<sub>4</sub>: 259.0940. Found: 259.0938.

**<sup>1</sup>H NMR (400 MHz, CDCl<sub>3</sub>)**: δ 10.61 (br s, 1H), 7.35–7.29 (m, 2H), 7.28–7.23 (m, 3H), 5.05 (hept, *J* = 6.3 Hz, 1H), 3.72 (t, *J* = 7.8 Hz, 1H), 3.27 (d, *J* = 7.8 Hz, 2H), 1.25 (d, *J* = 6.3 Hz, 3H), 1.16 (d, *J* = 6.3 Hz, 3H).

**<sup>13</sup>C{<sup>1</sup>H} NMR (100 MHz, CDCl<sub>3</sub>)**: δ 174.8 (C), 168.3 (C), 137.5 (C), 128.9 (2 CH), 128.7 (2 CH), 127.0 (CH), 69.7 (CH), 53.8 (CH), 34.7 (CH<sub>2</sub>), 21.6 (2 CH<sub>3</sub>).

Compound **4dh**: Following *GP6* performed with **7h** (0.50 g, 2.1 mmol, 1.0 equiv) and benzyl alcohol (**8d**, 0.22 mL, 2.1 mmol, 1.0 equiv) in refluxing toluene for 4 h, the desired product **4dh** was obtained as a pale yellow oil contaminated by ca. 13% of the decarboxylated product (0.392 g, 57%).

**HRMS (ESI<sup>+</sup>)**: *m/z* [M+Na]<sup>+</sup> Calcd. for C<sub>17</sub>H<sub>16</sub>NaO<sub>4</sub>: 307.0940. Found: 307.0941.

**<sup>1</sup>H NMR (400 MHz, CDCl<sub>3</sub>)**: δ 10.71 (br s, 1H), 7.41–7.21 (m, 10H), 5.19 (s, 2H), 3.84 (t, *J* = 7.7 Hz, 1H), 3.31 (d, *J* = 7.7 Hz, 2H).

**<sup>13</sup>C{<sup>1</sup>H} NMR (100 MHz, CDCl<sub>3</sub>)**: δ 174.6 (C), 168.6 (C), 137.3 (C), 135.1 (C), 128.9 (2 CH), 128.7 (2 CH), 128.7 (2 CH), 128.5 (CH), 128.3 (2 CH), 127.0 (CH), 67.5 (CH<sub>2</sub>), 53.7 (CH), 34.8 (CH<sub>2</sub>).

Compound **4da**: Following *GP6* performed with **7a** (0.32 g, 2.0 mmol, 1.0 equiv) and benzyl alcohol (**8d**, 0.21 mL, 2.0 mmol, 1.0 equiv) in refluxing toluene for 8 h, the desired product **4da** was obtained as a pale yellow oil (0.357 g, 85%).

Compound **4ea**: Following *GP6* performed with **7a** (0.32 g, 2.0 mmol, 1.0 equiv) and (–)-menthol (**8e**, 0.312 g, 2.0 mmol, 1.0 equiv) in refluxing toluene for 5 h, the desired product **4ea** was obtained as a colorless oil (0.375 g, 58%).

Compound **4bs**:<sup>28</sup> Following *GP6* performed with **7s** (0.440 g, 2.0 mmol, 1.0 equiv) in a refluxing mixture of toluene and EtOH 1:1 for 8 h, the desired product **4bs** was obtained as white solid (0.272 g, 65%).

**<sup>1</sup>H NMR (400 MHz, CDCl<sub>3</sub>)**: δ 9.52 (br s, 1H), 7.46–7.29 (m, 5H), 4.65 (s, 1H), 4.30–4.15 (m, 2H), 1.26 (t, *J* = 7.1 Hz, 3H).

**<sup>13</sup>C{<sup>1</sup>H} NMR (100 MHz, CDCl<sub>3</sub>)**: δ 173.5 (C), 168.3 (C), 132.3 (C), 129.3 (2 CH), 128.9 (2 CH), 128.6 (CH), 62.3 (CH<sub>2</sub>), 57.7 (CH), 14.1 (CH<sub>3</sub>).

## 6. Copies of NMR spectra

<sup>28</sup> Bagum, H.; Christensen, K.E.; Genov, M.; Pretsch, A.; Pretsch, D.; Moloney, M. G. *Tetrahedron* **2019**, 75, 130561.

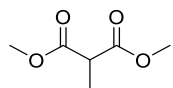

**3aa**

$^1\text{H}$ ,  $\text{CDCl}_3$ , 400 MHz

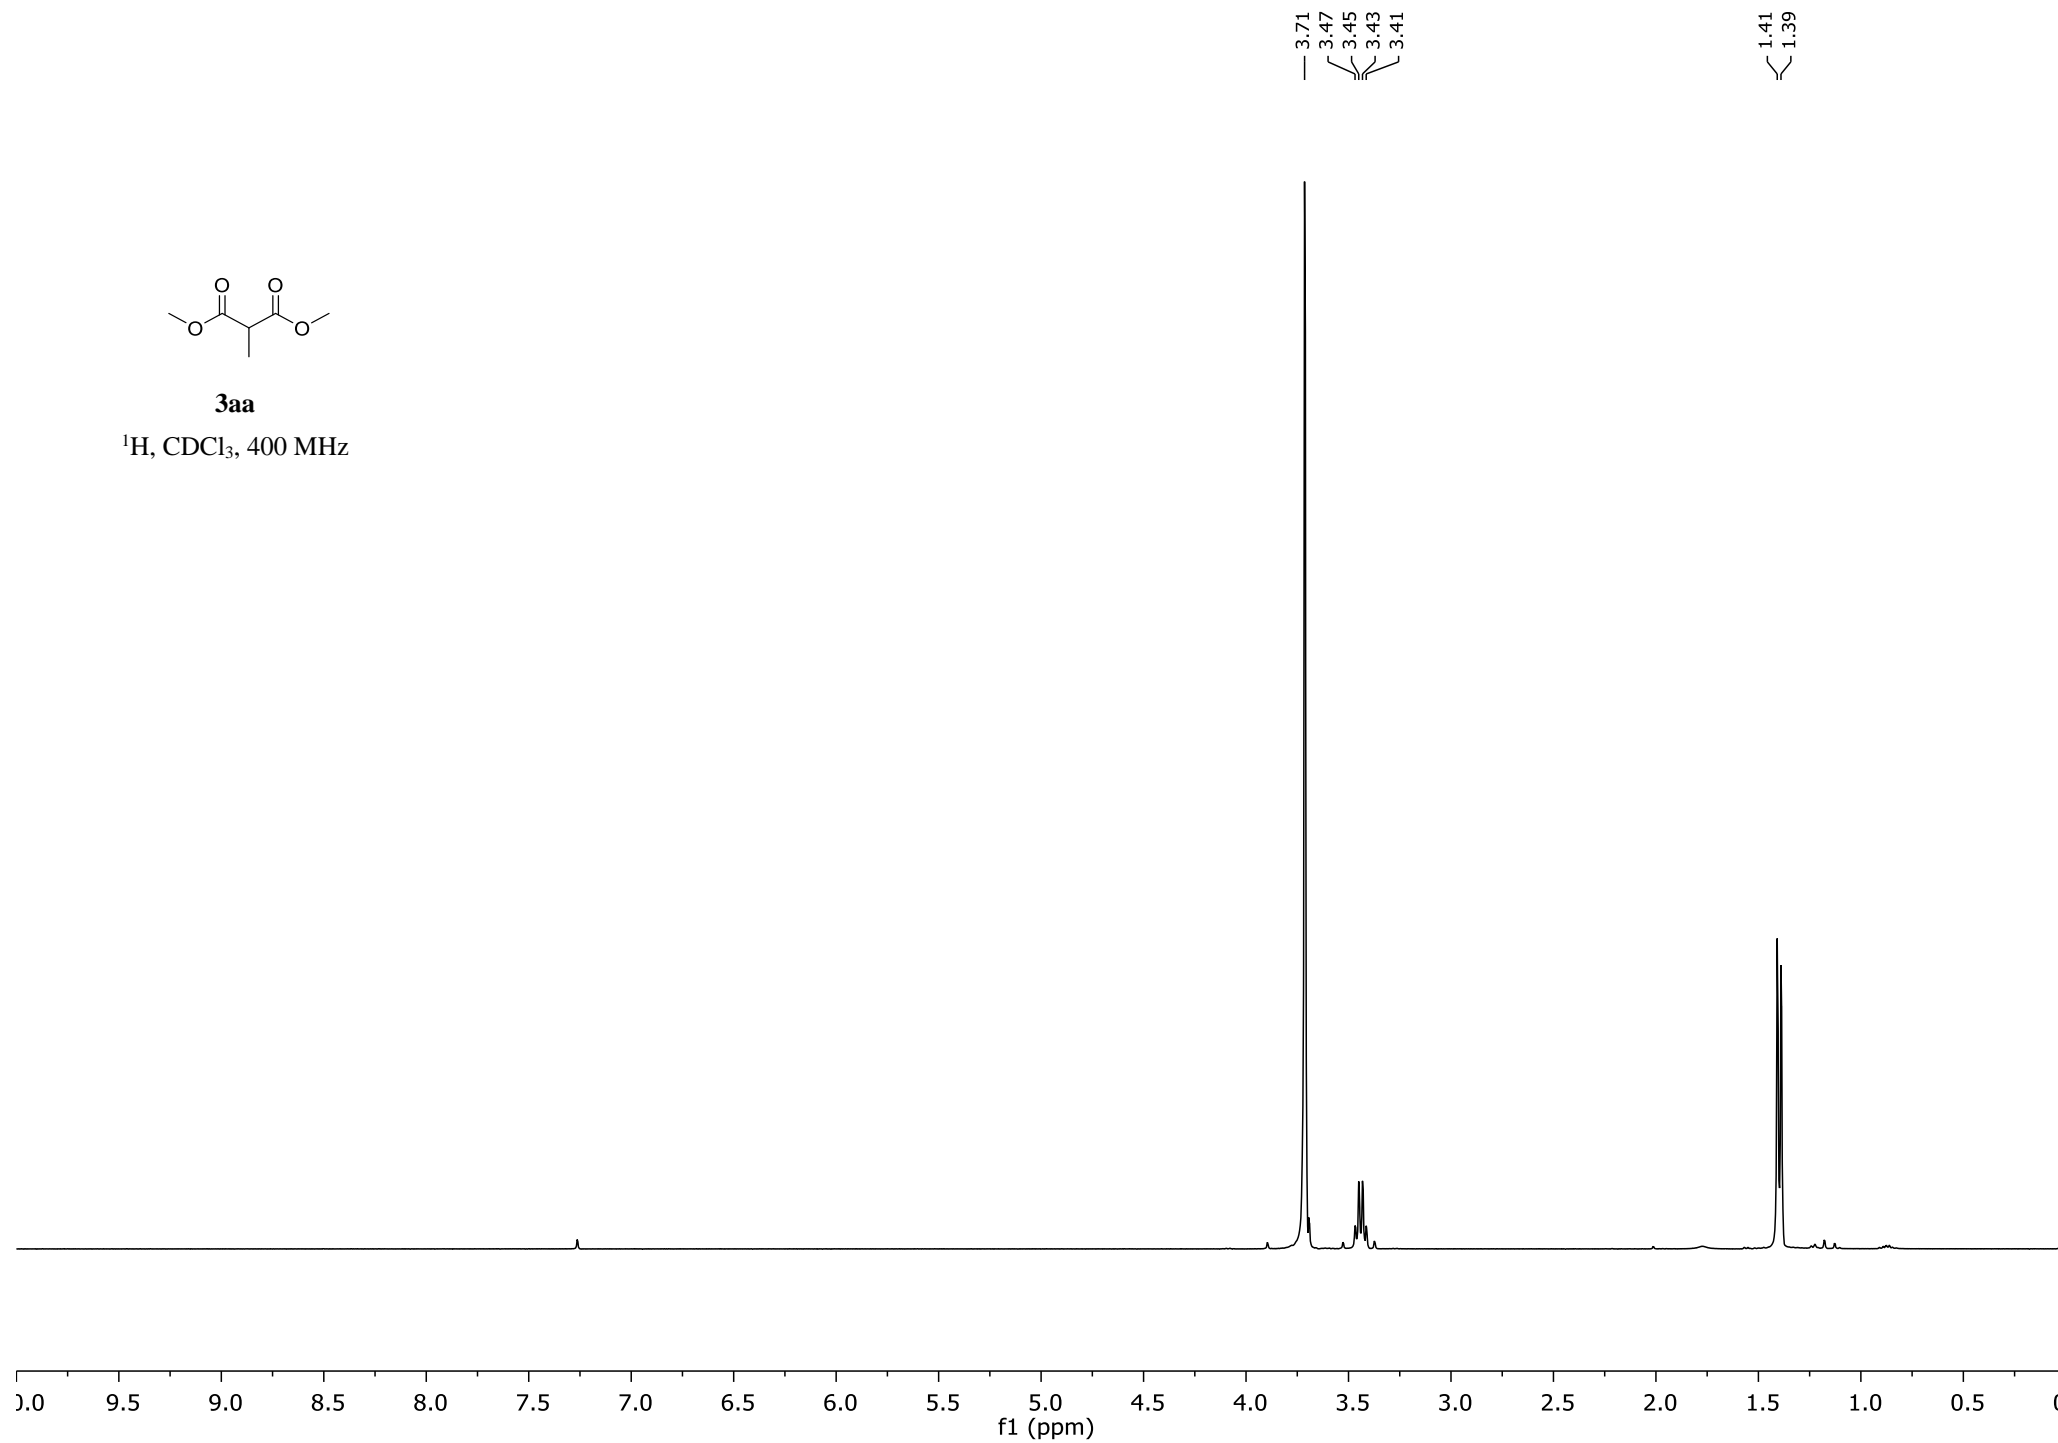



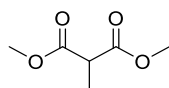

**3aa**

$^{13}\text{C}\{^1\text{H}\}$ ,  $\text{CDCl}_3$ , 100 MHz

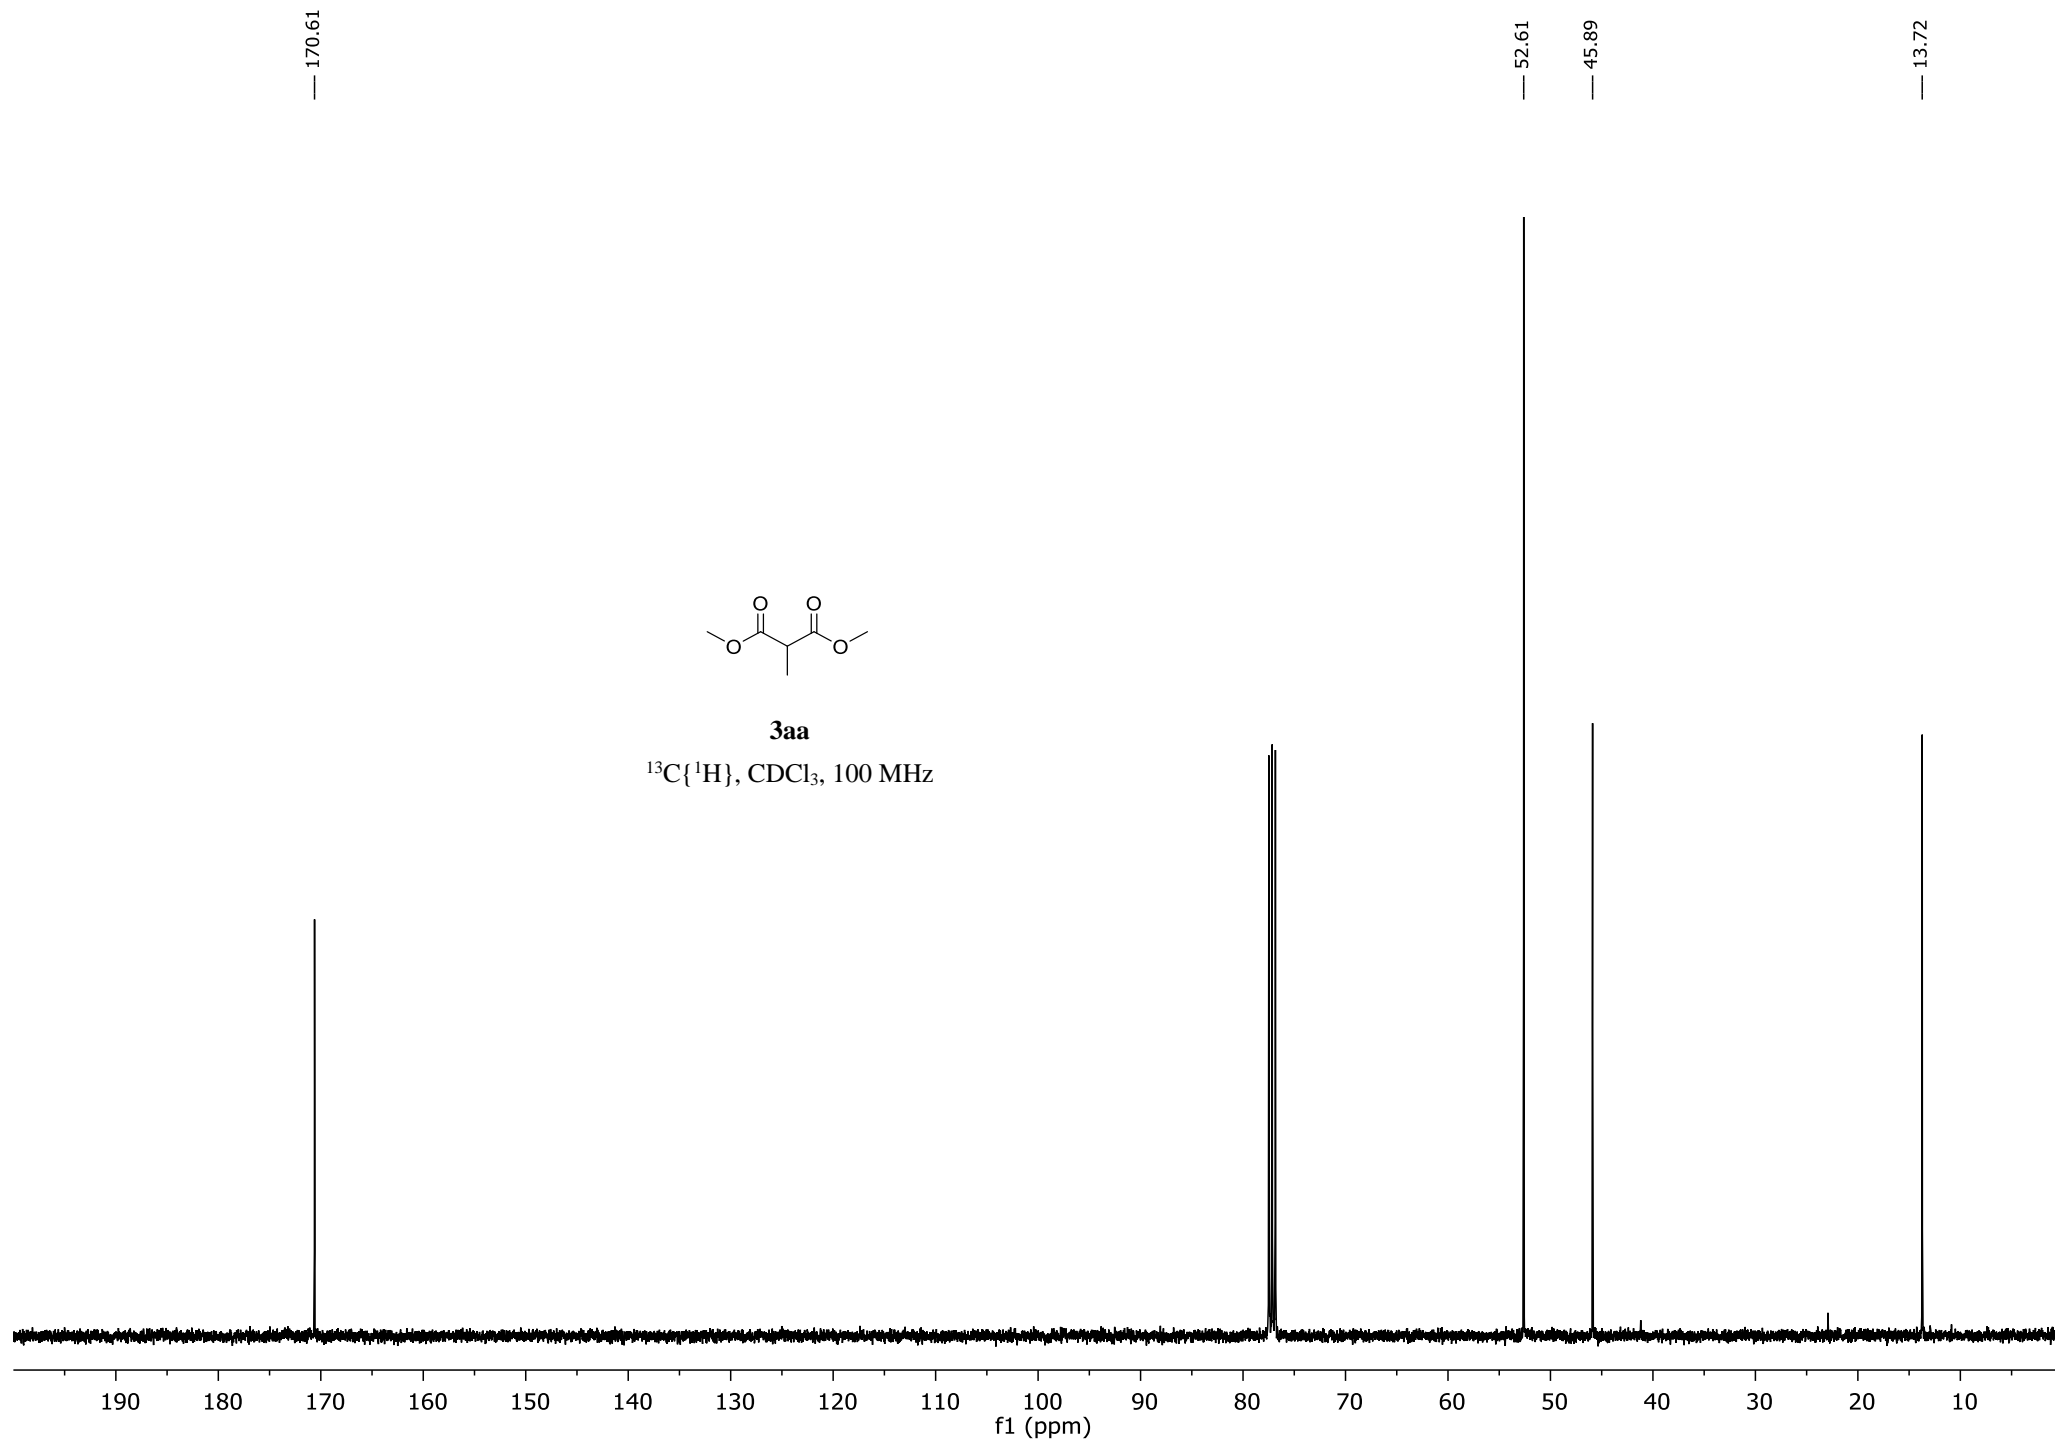

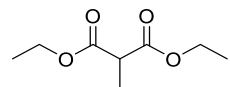

**3ba**

$^1\text{H}$ ,  $\text{CDCl}_3$ , 400 MHz

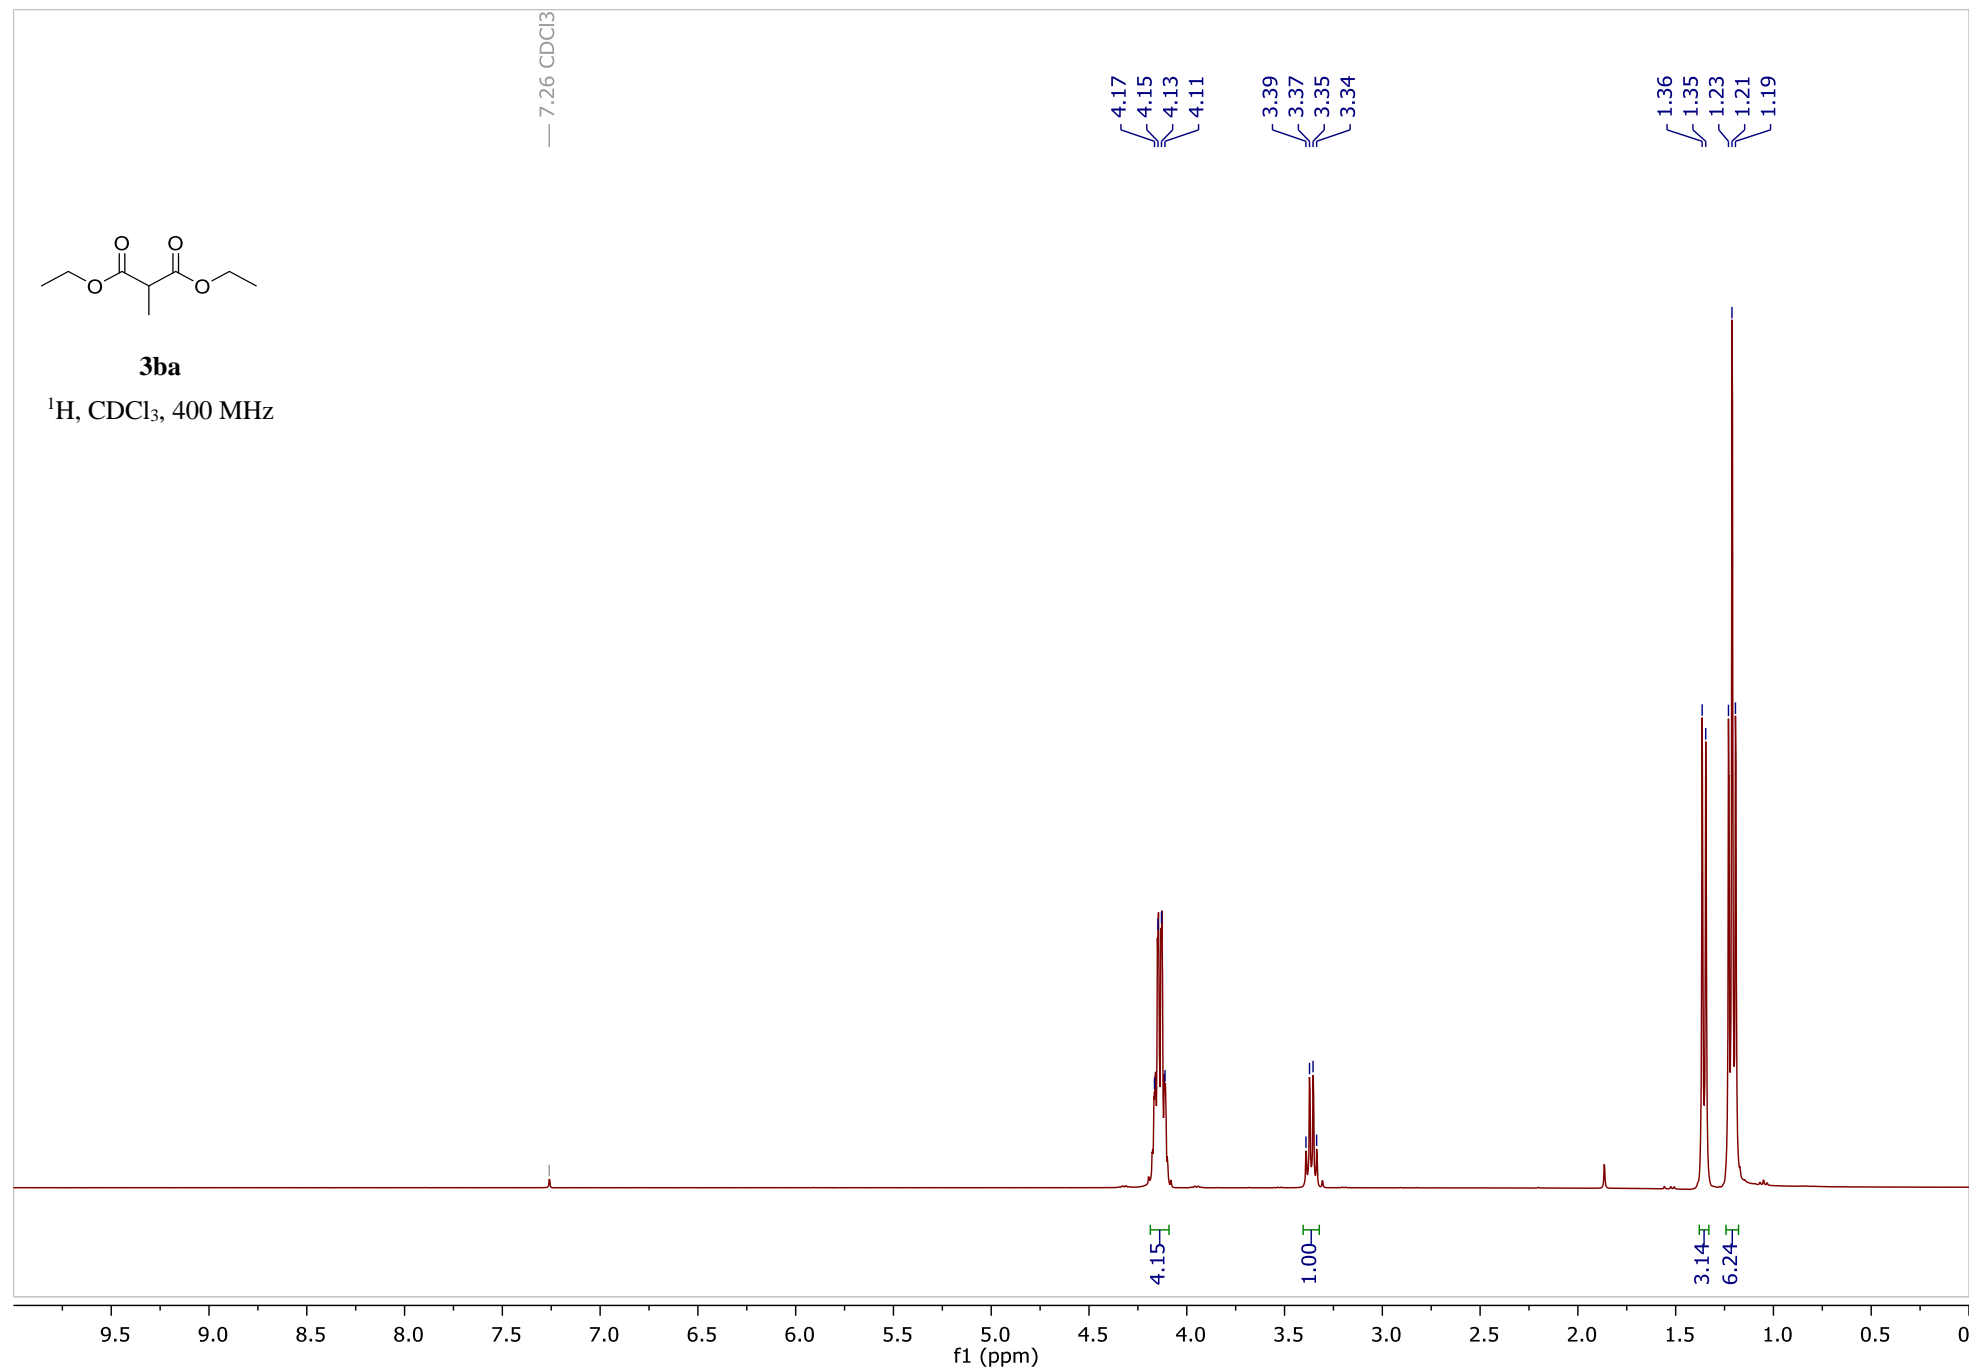

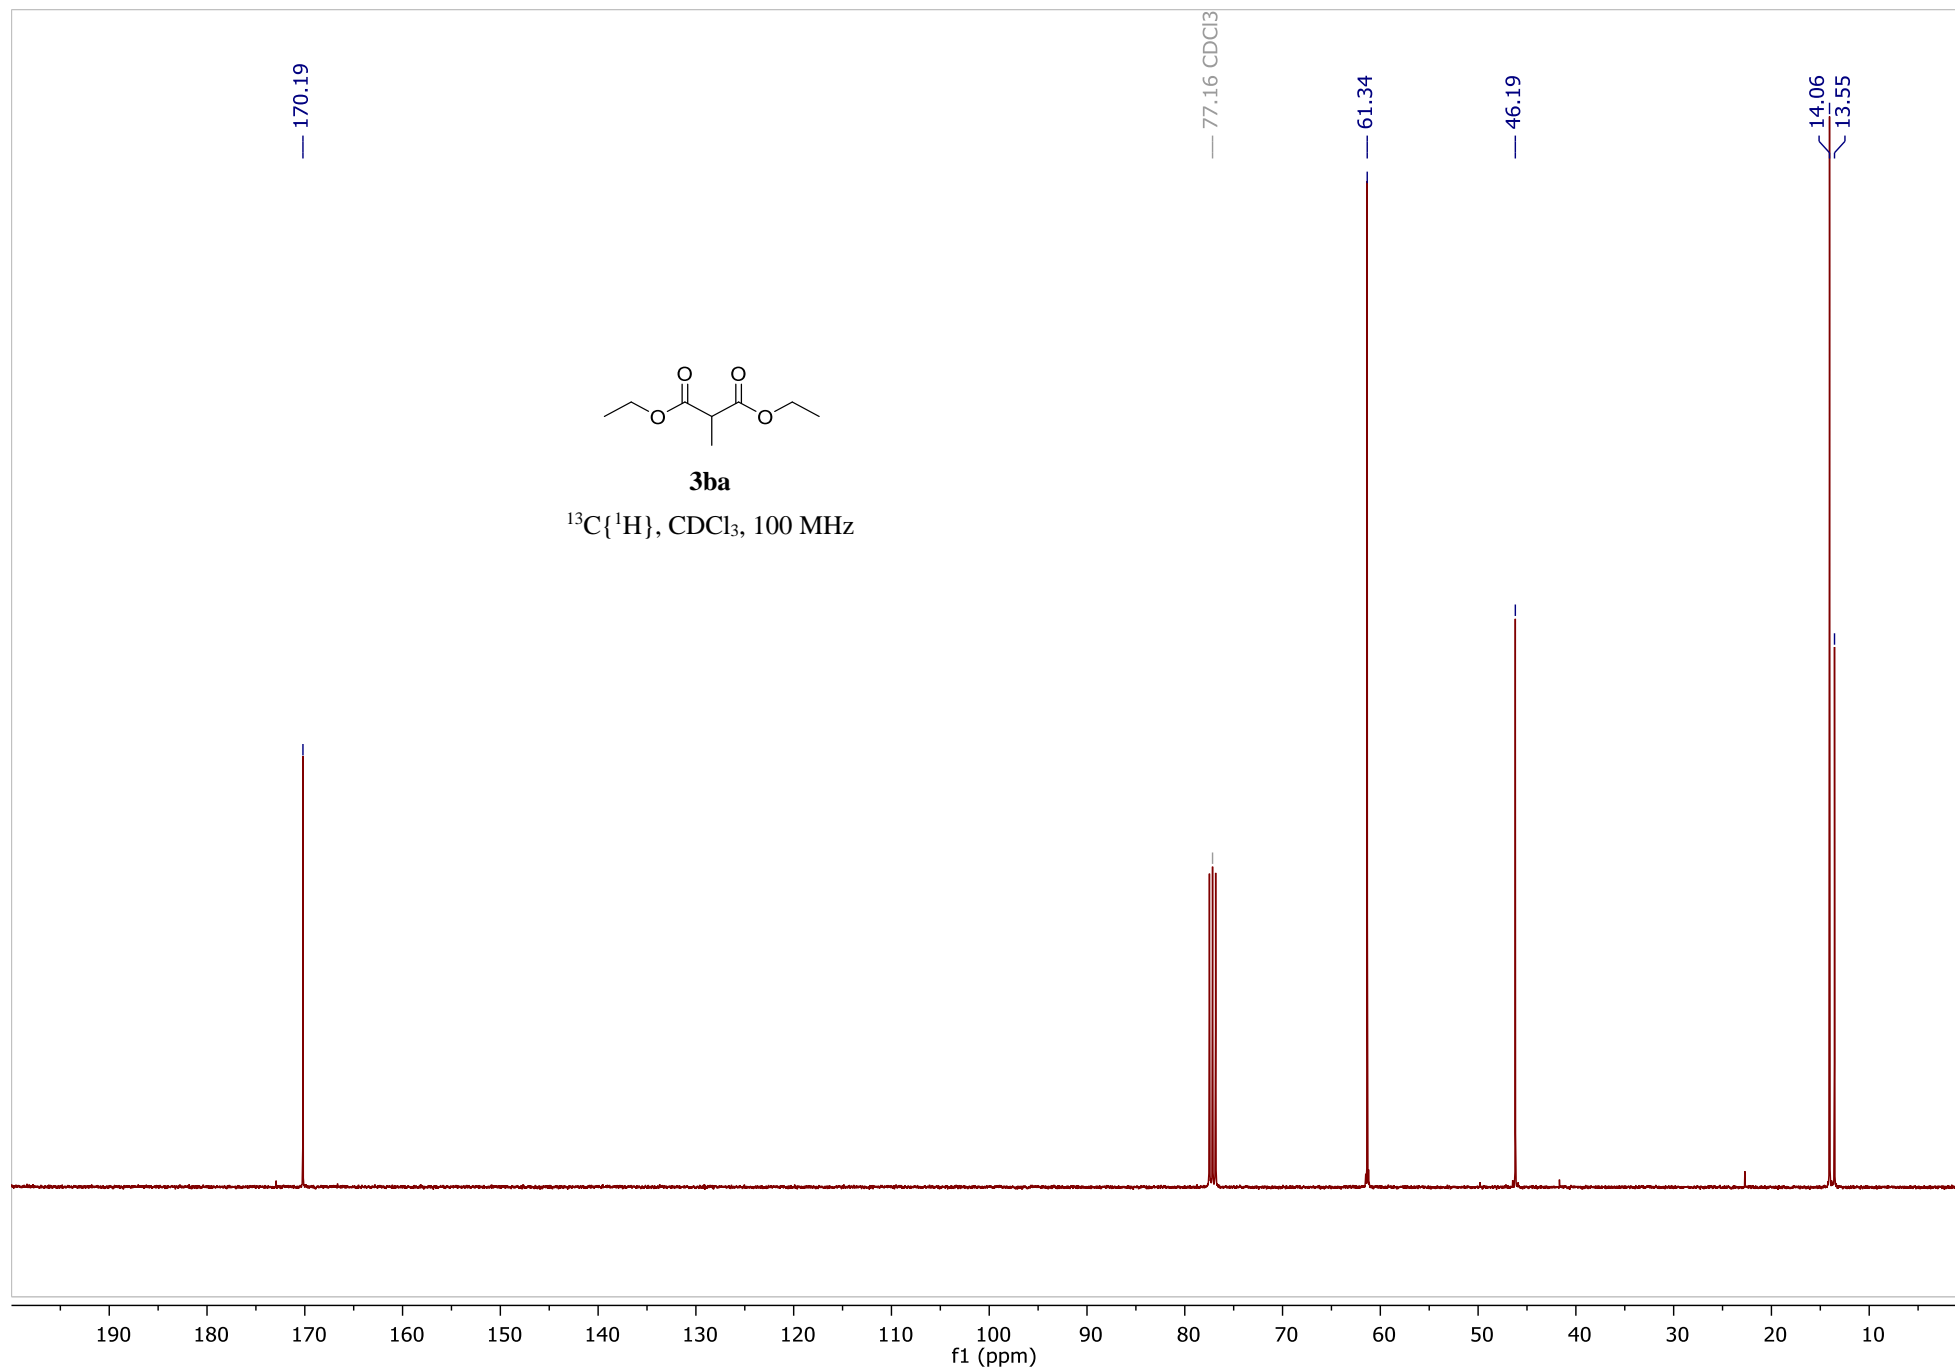

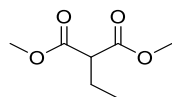

**3ab**

$^1\text{H}$ ,  $\text{CDCl}_3$ , 400 MHz

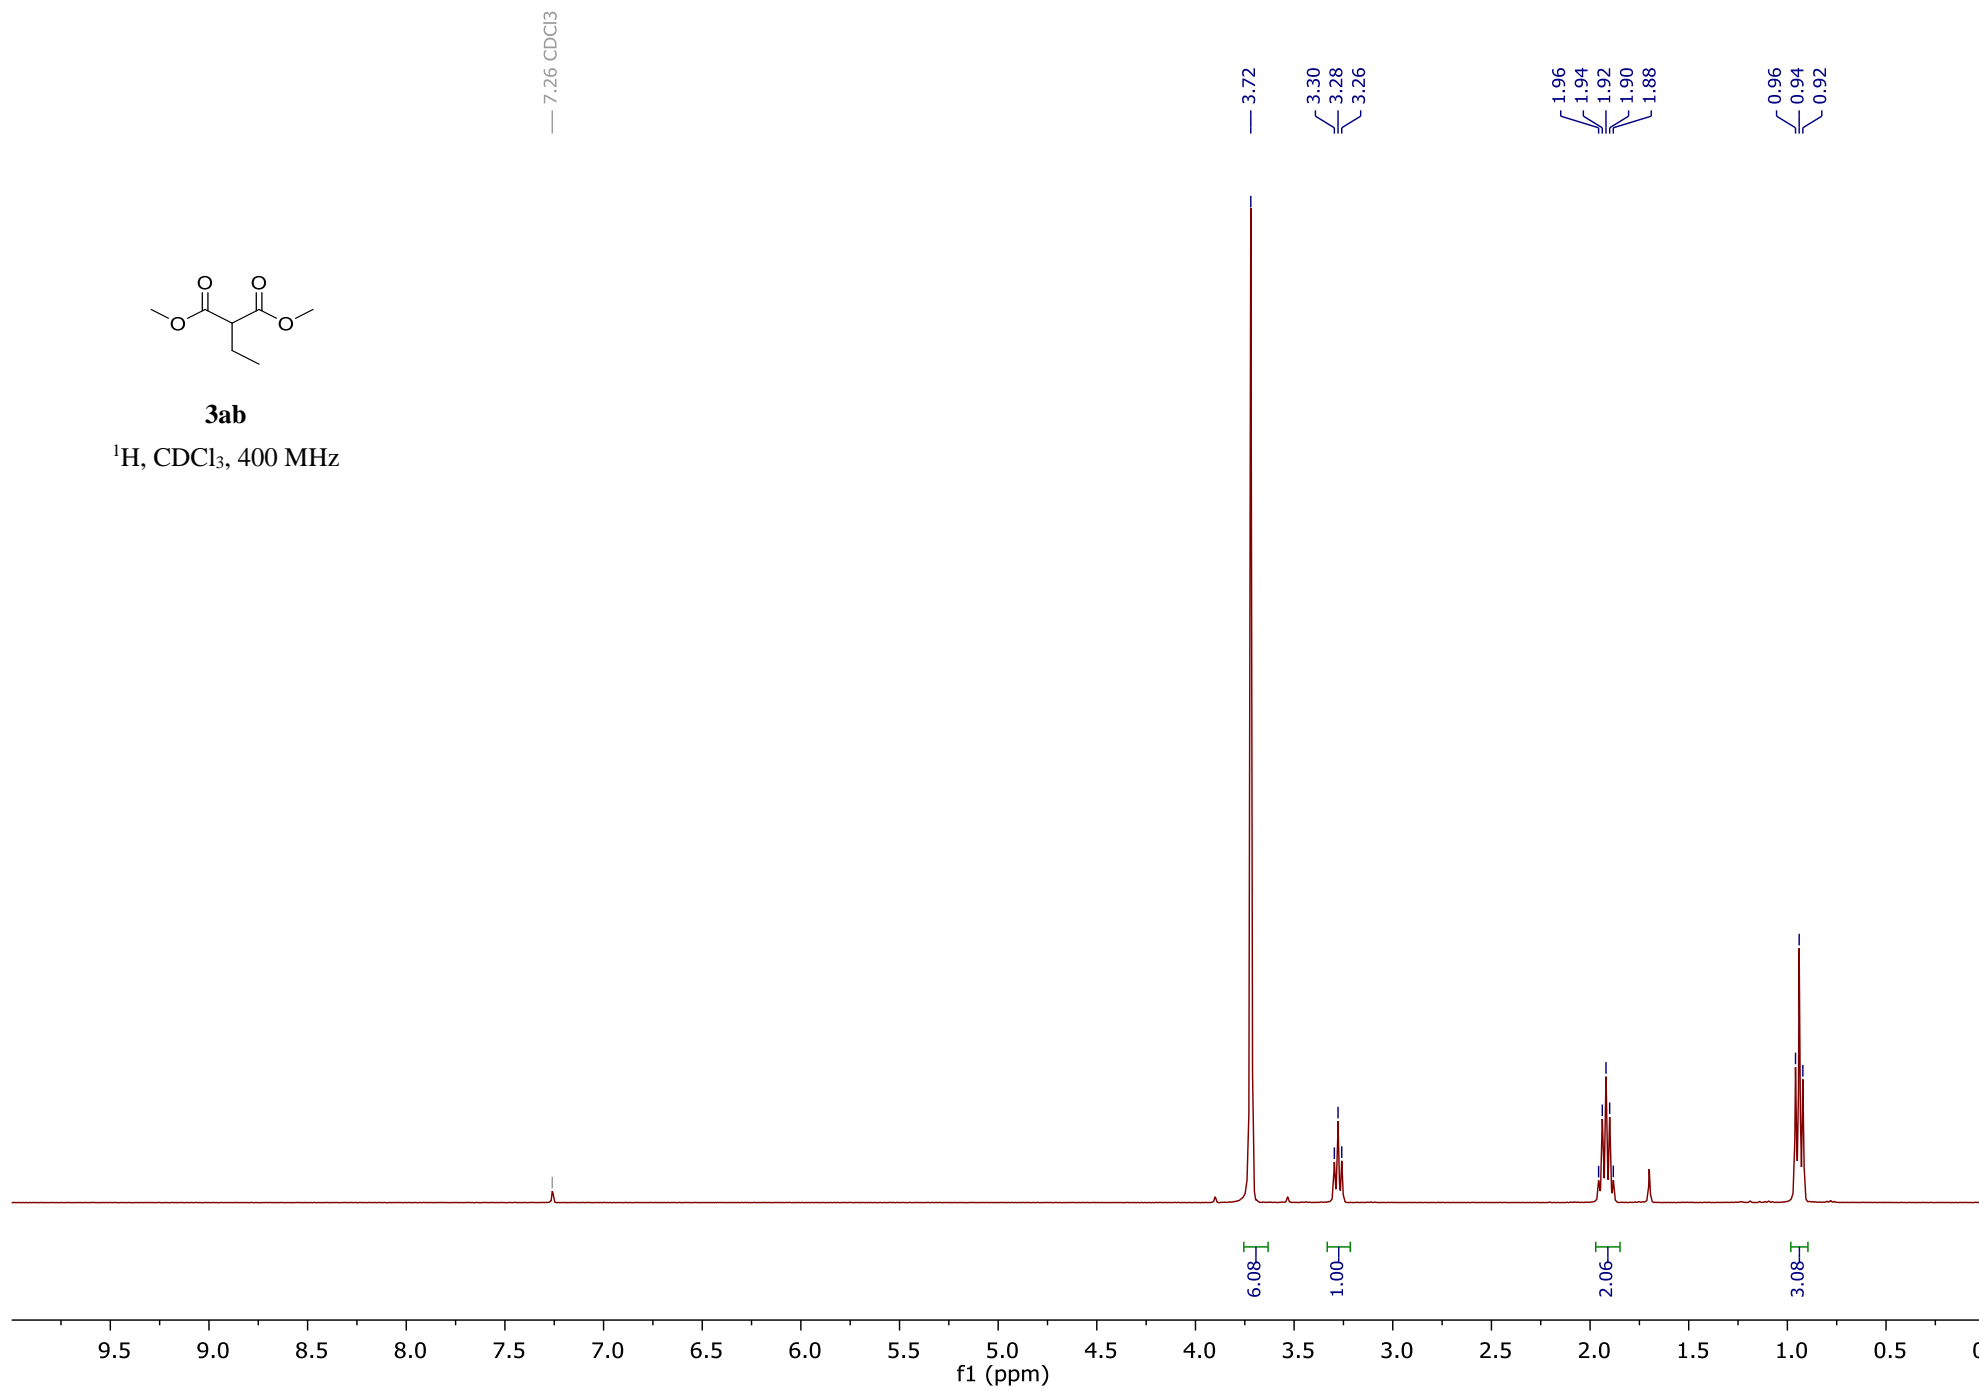

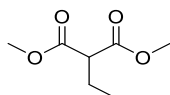

**3ab**

$^{13}\text{C}\{^1\text{H}\}$ ,  $\text{CDCl}_3$ , 100 MHz

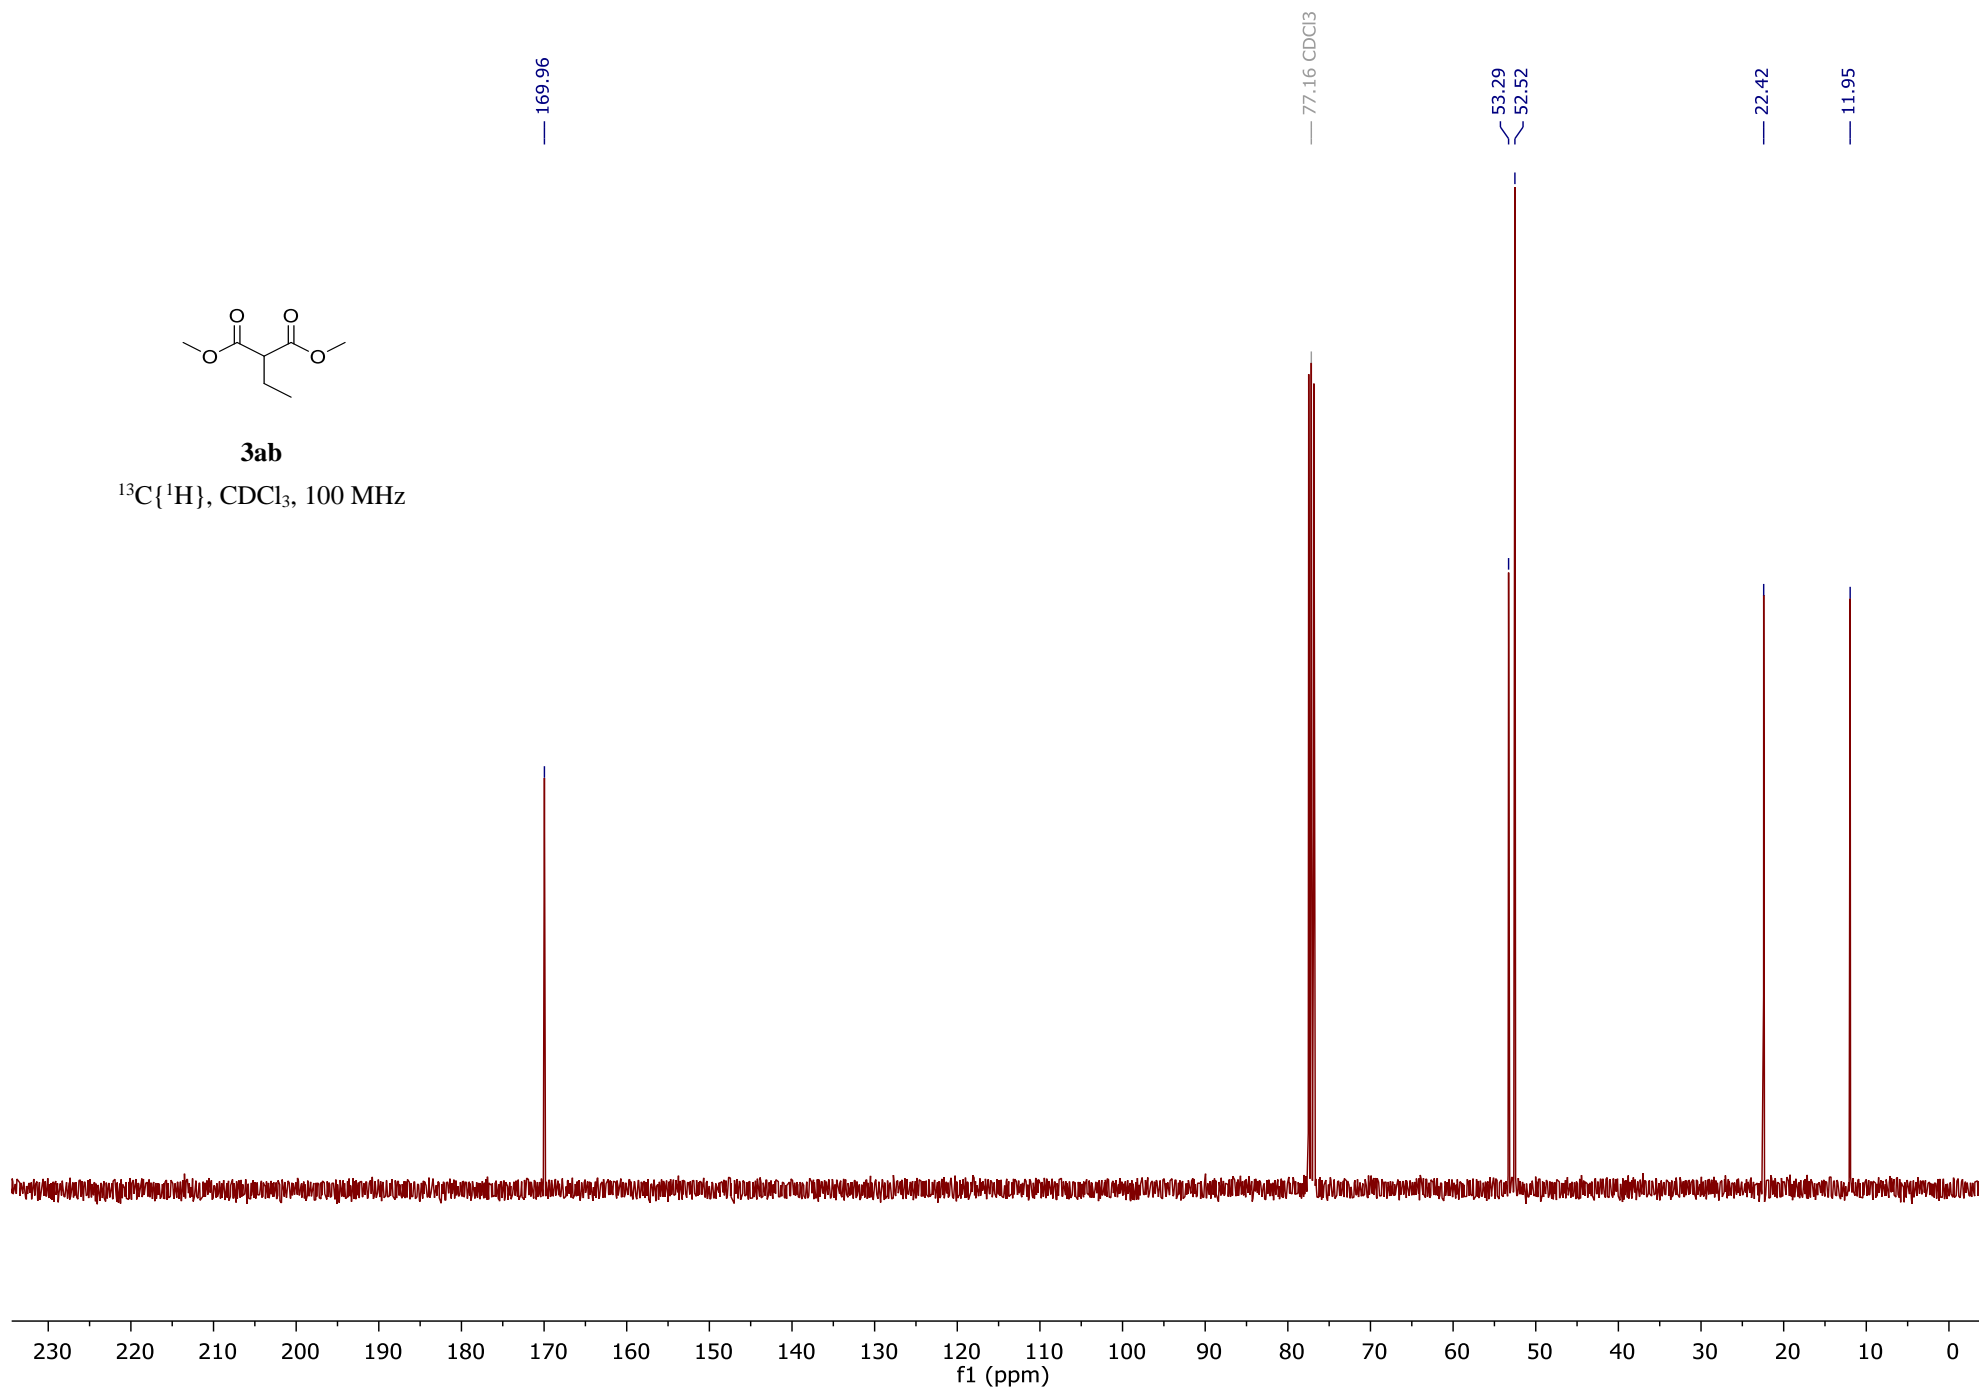

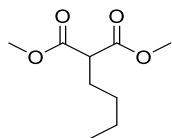

**3ac**

$^1\text{H}$ ,  $\text{CDCl}_3$ , 400 MHz

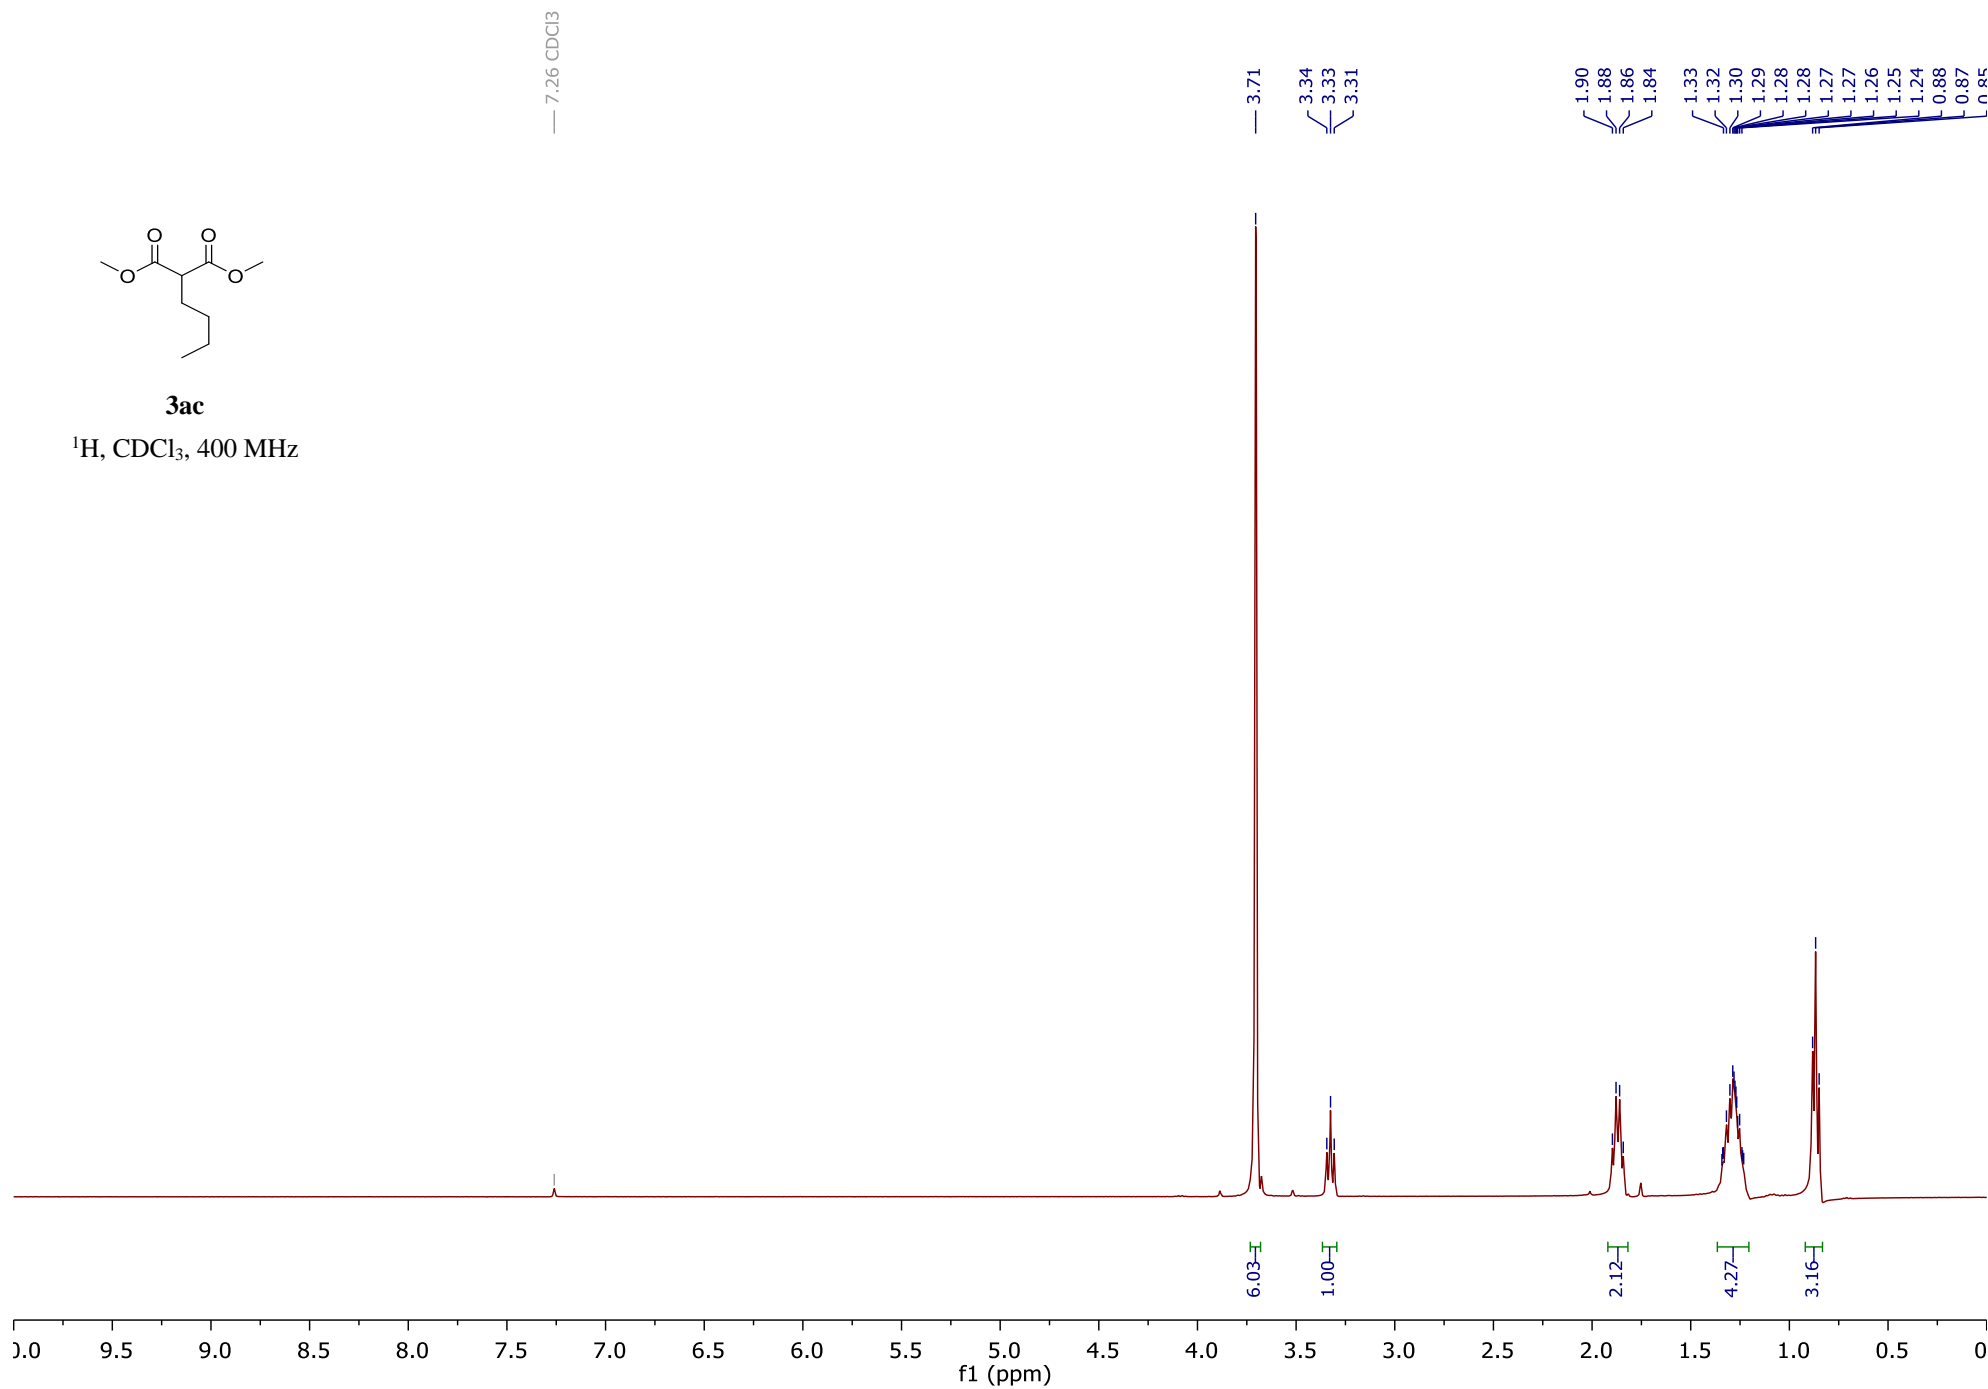

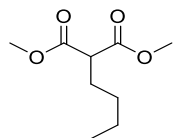

**3ac**

$^{13}\text{C}\{^1\text{H}\}$ ,  $\text{CDCl}_3$ , 100 MHz

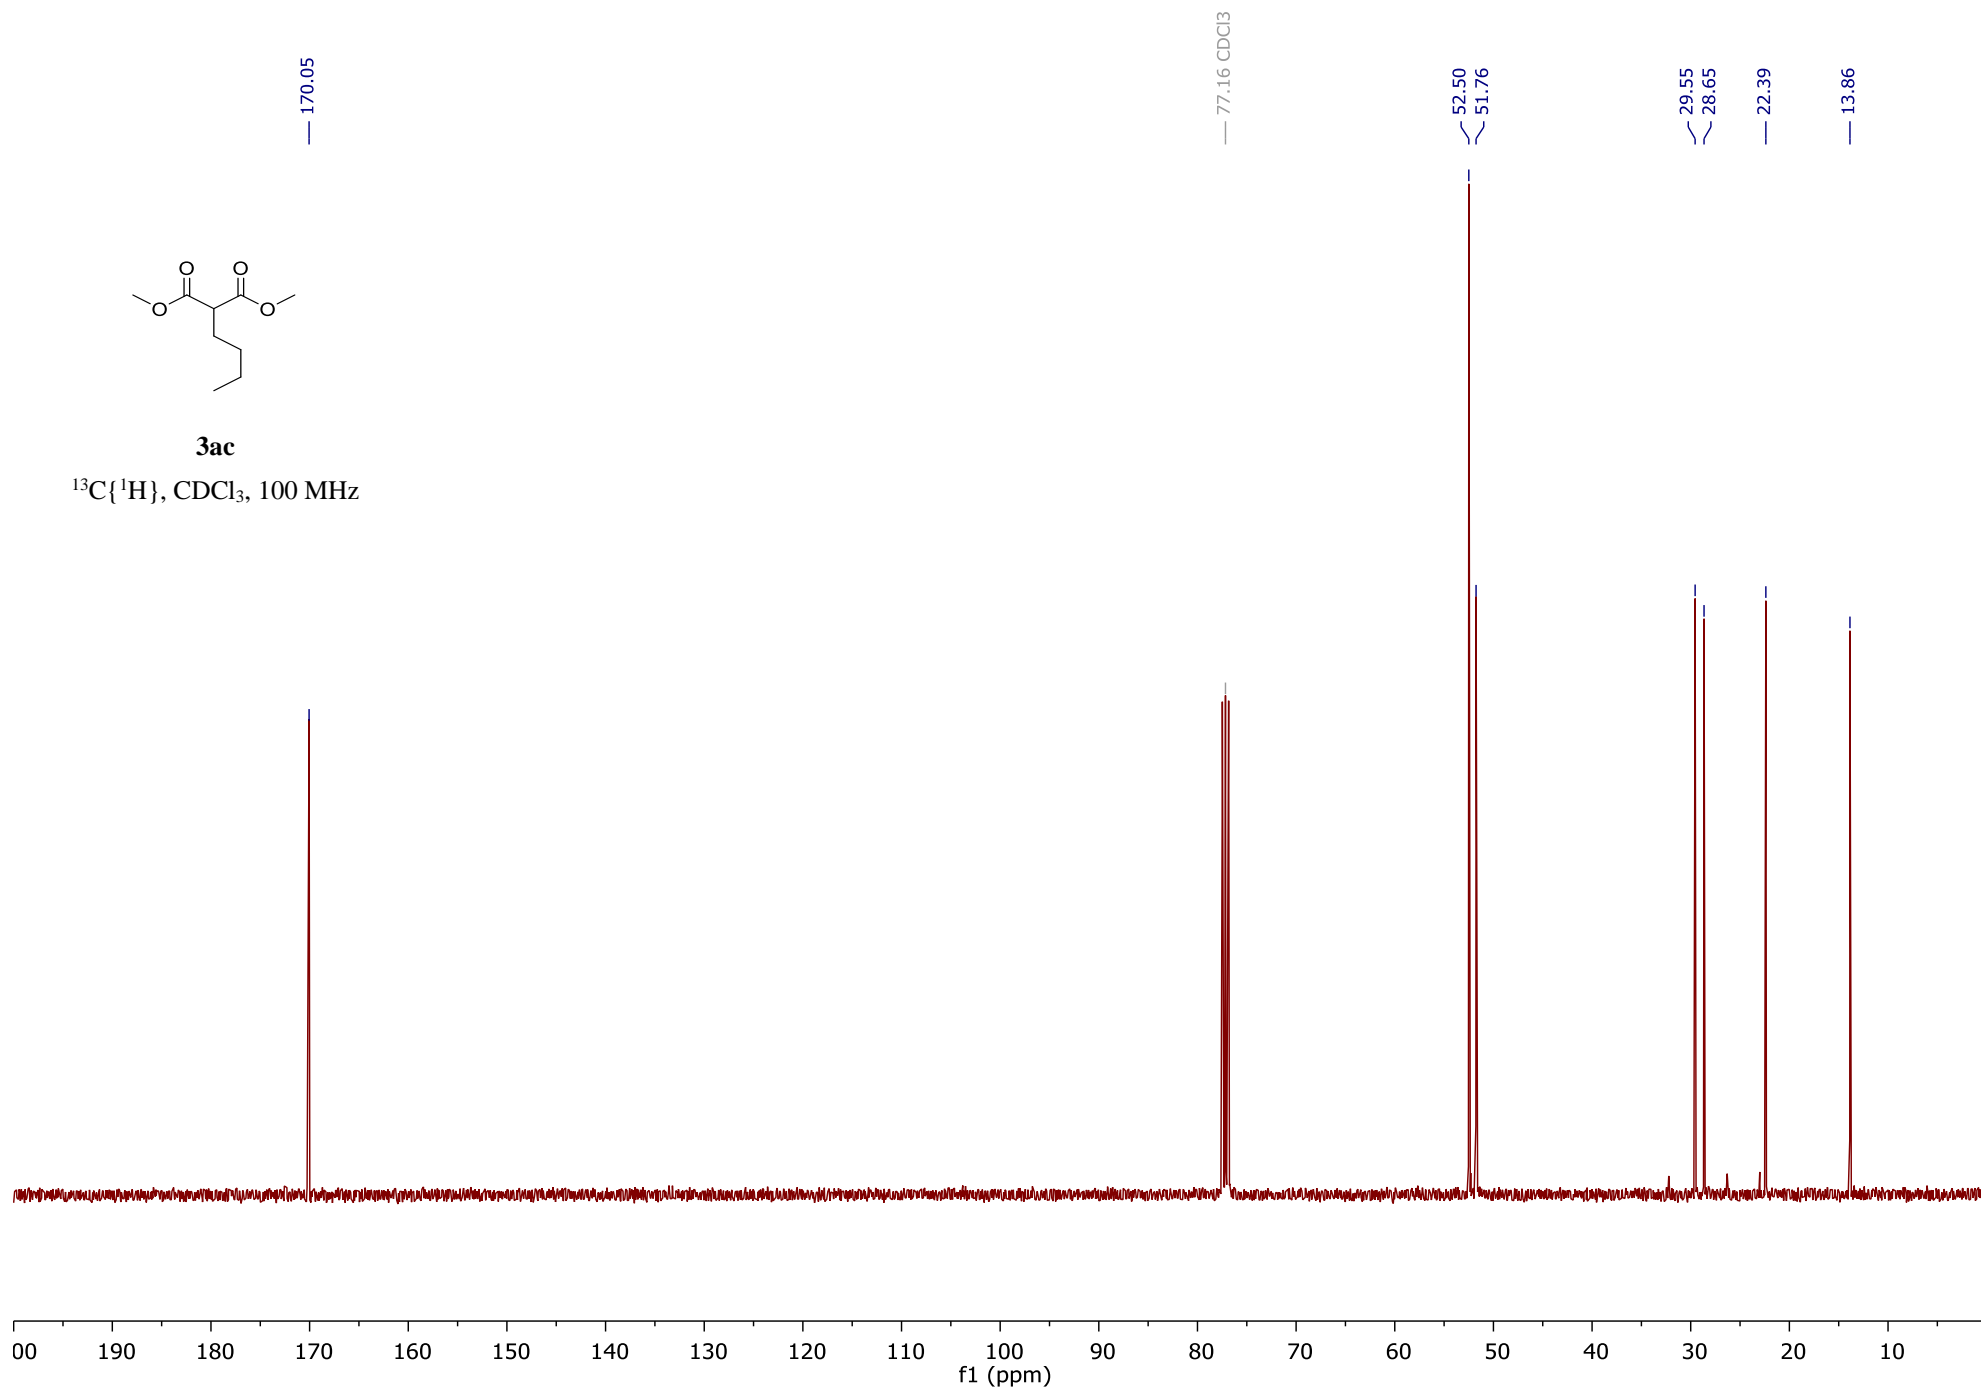

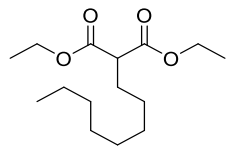

**3bd**

$^1\text{H}$ ,  $\text{CDCl}_3$ , 400 MHz

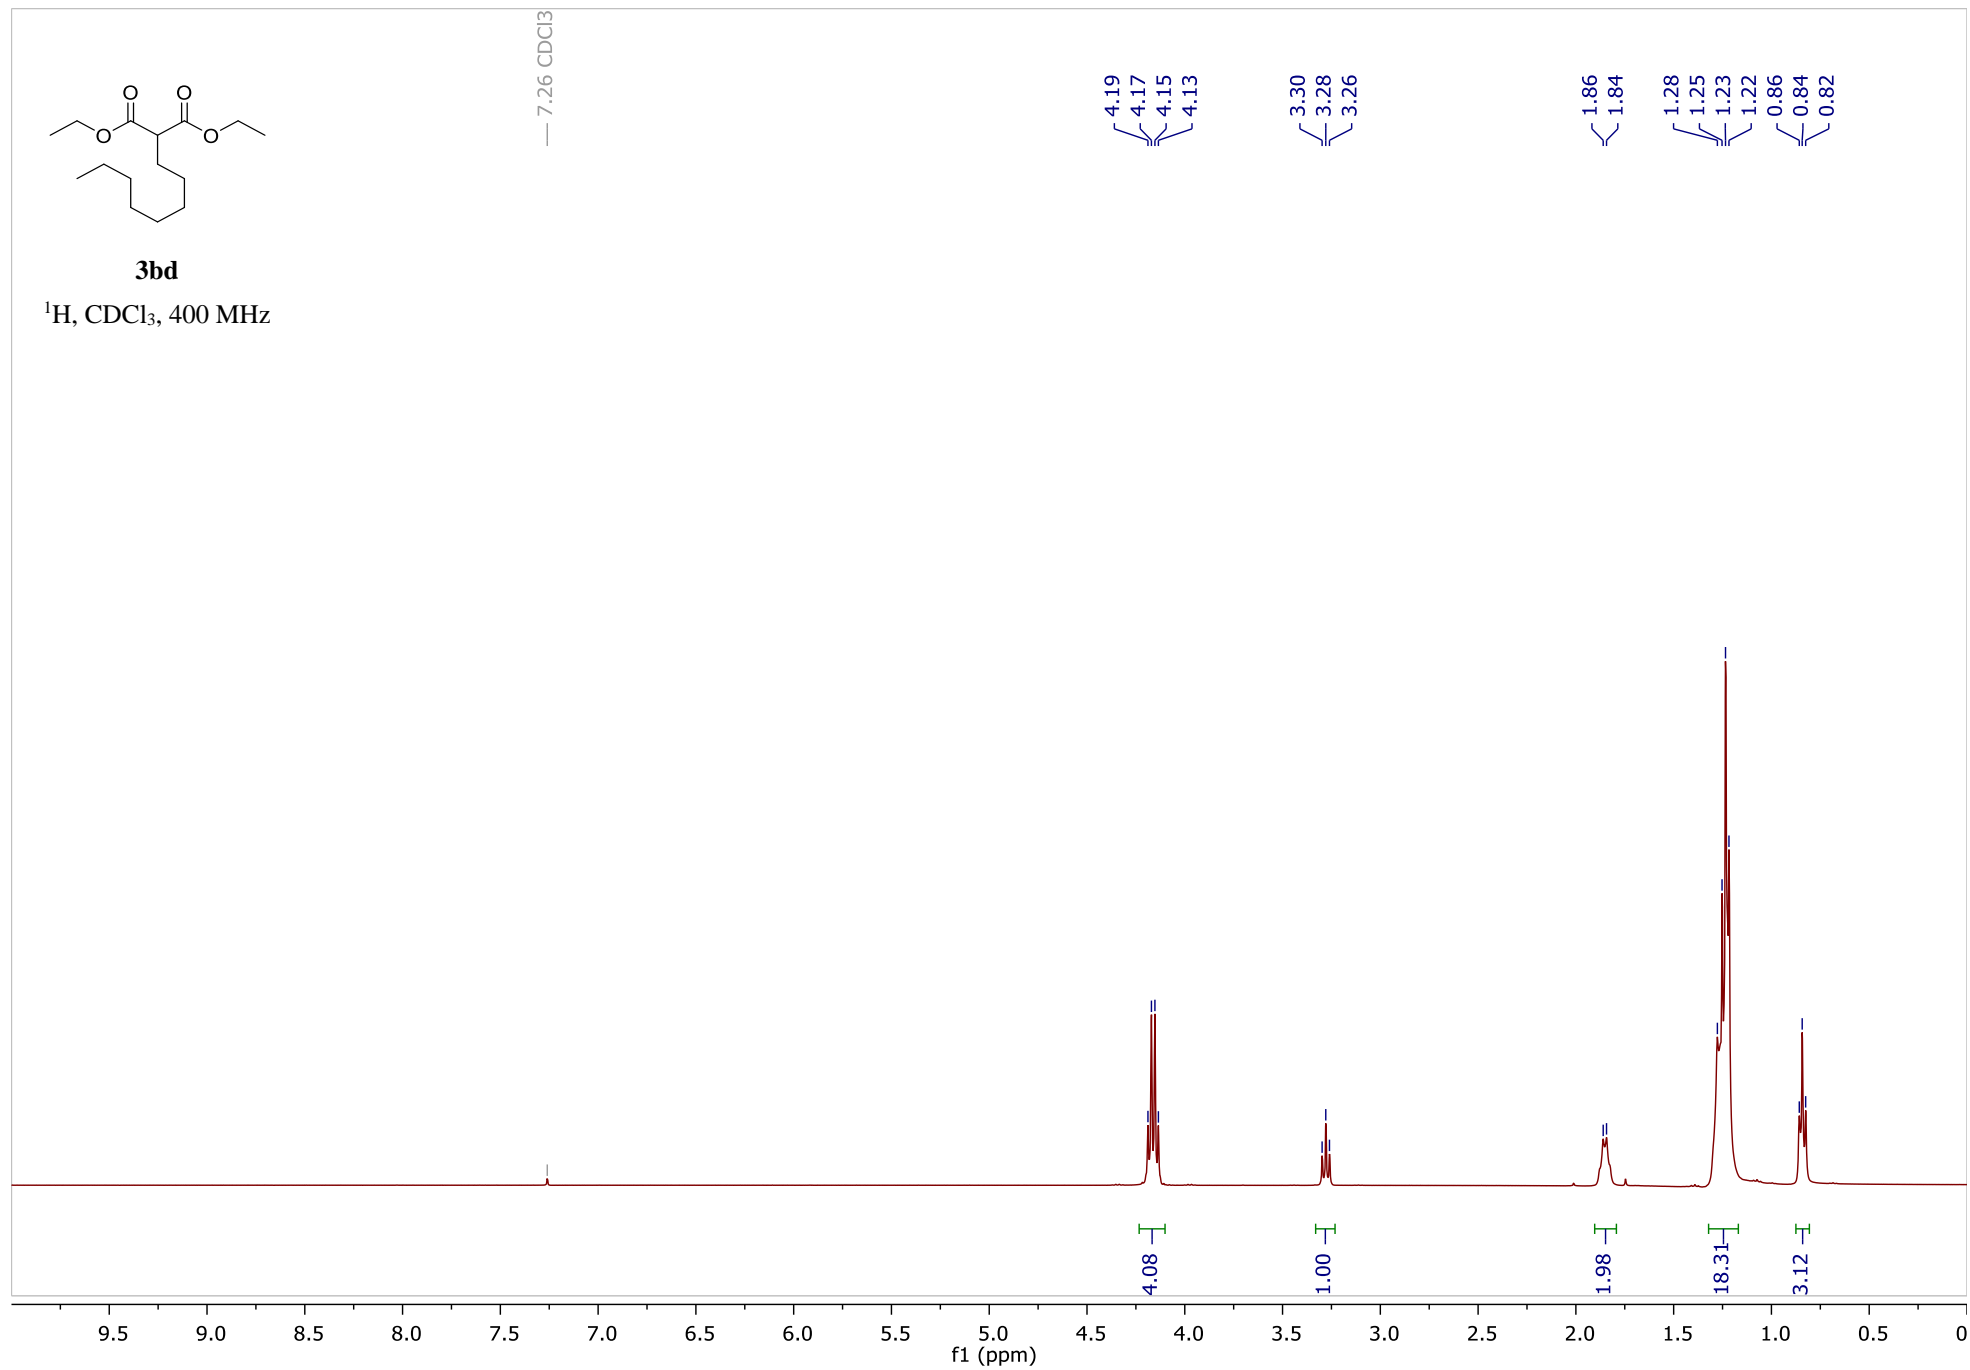



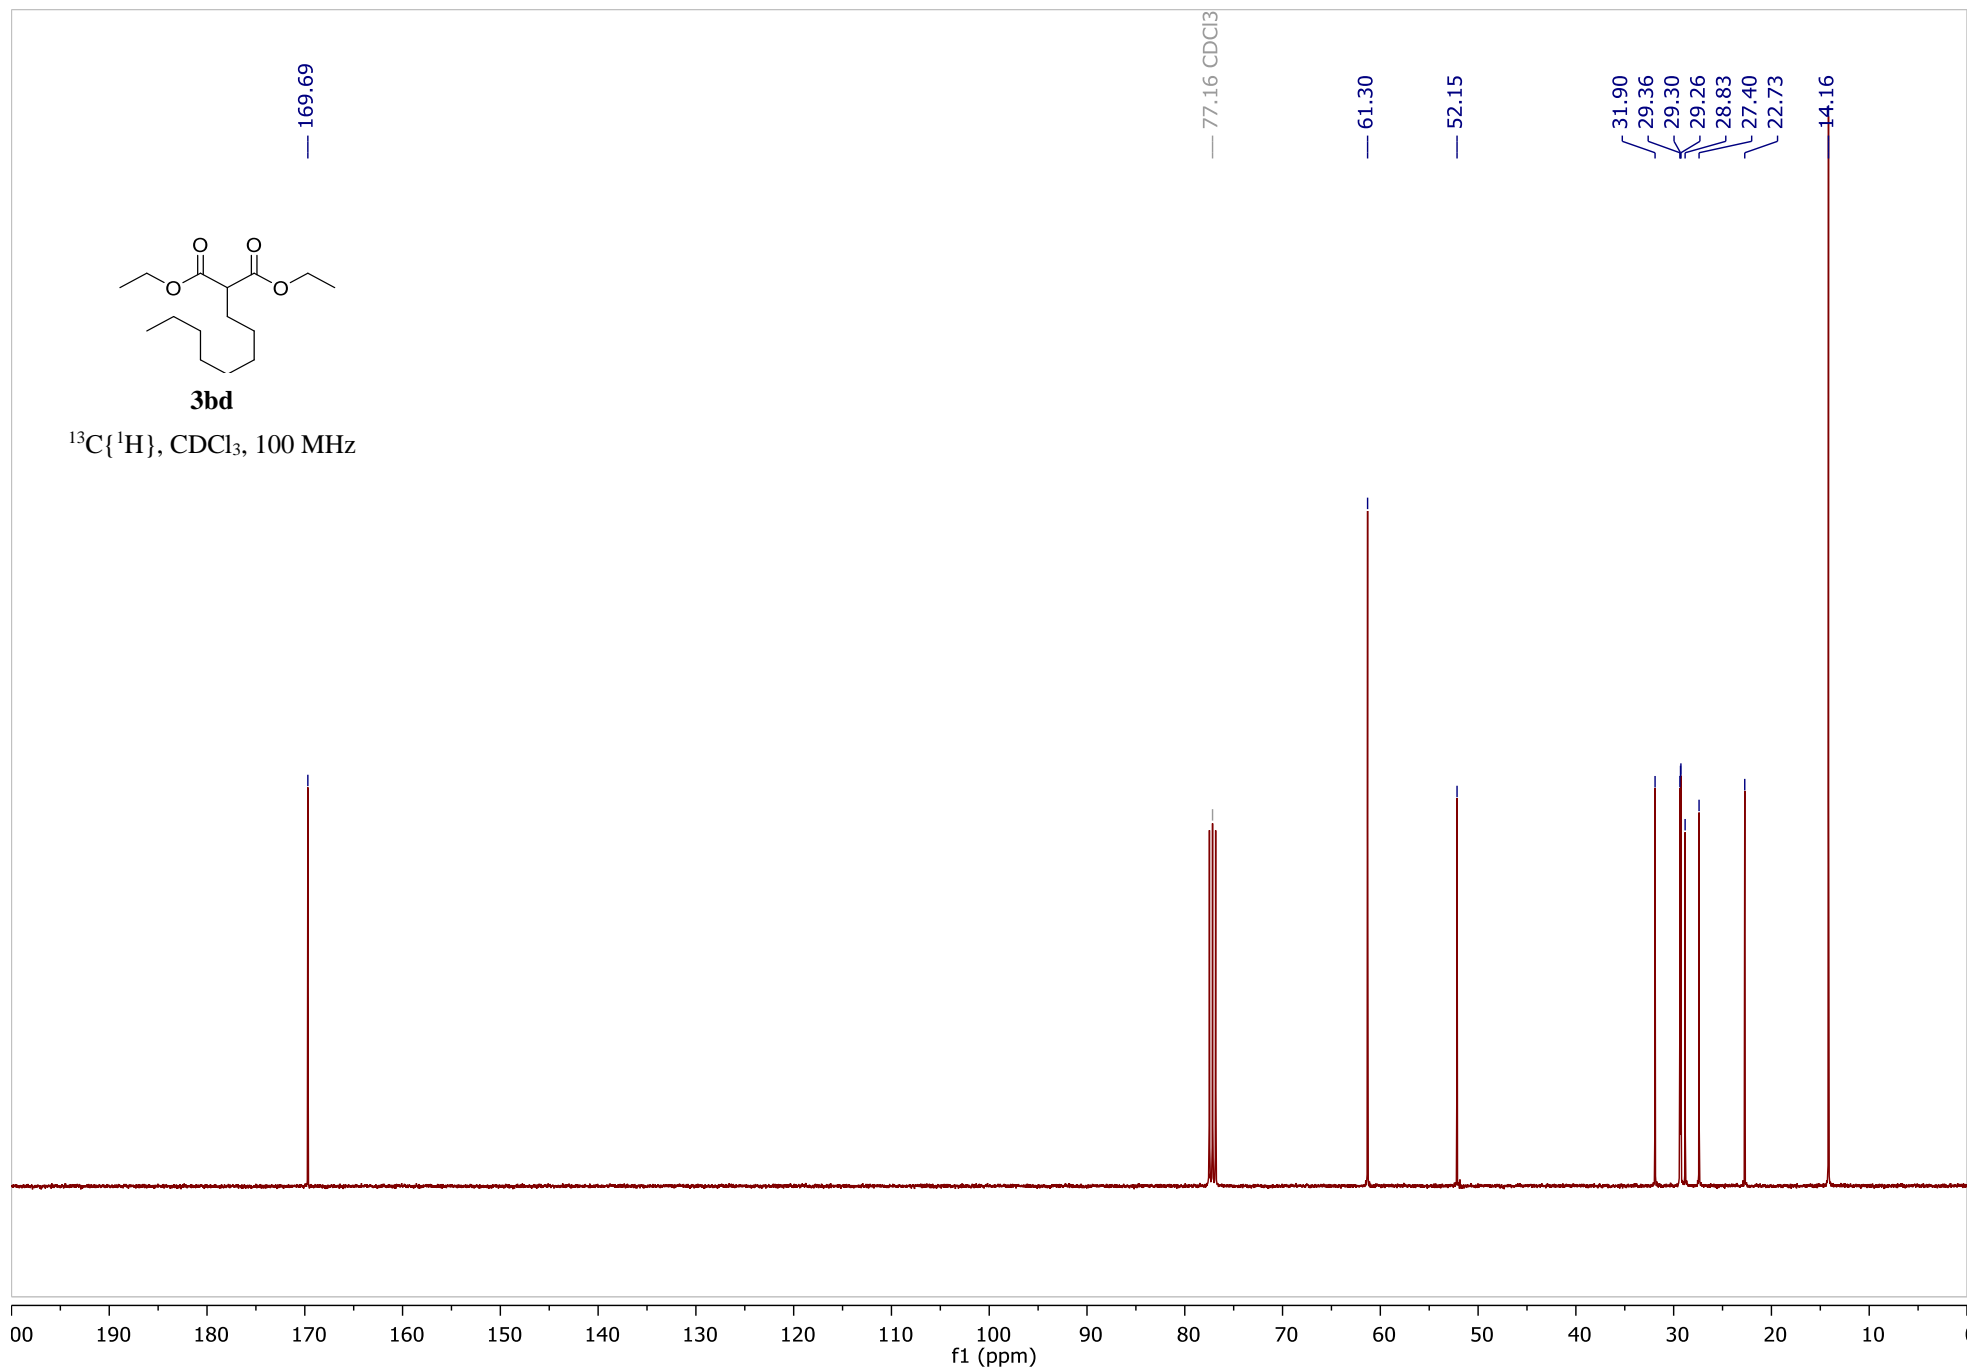

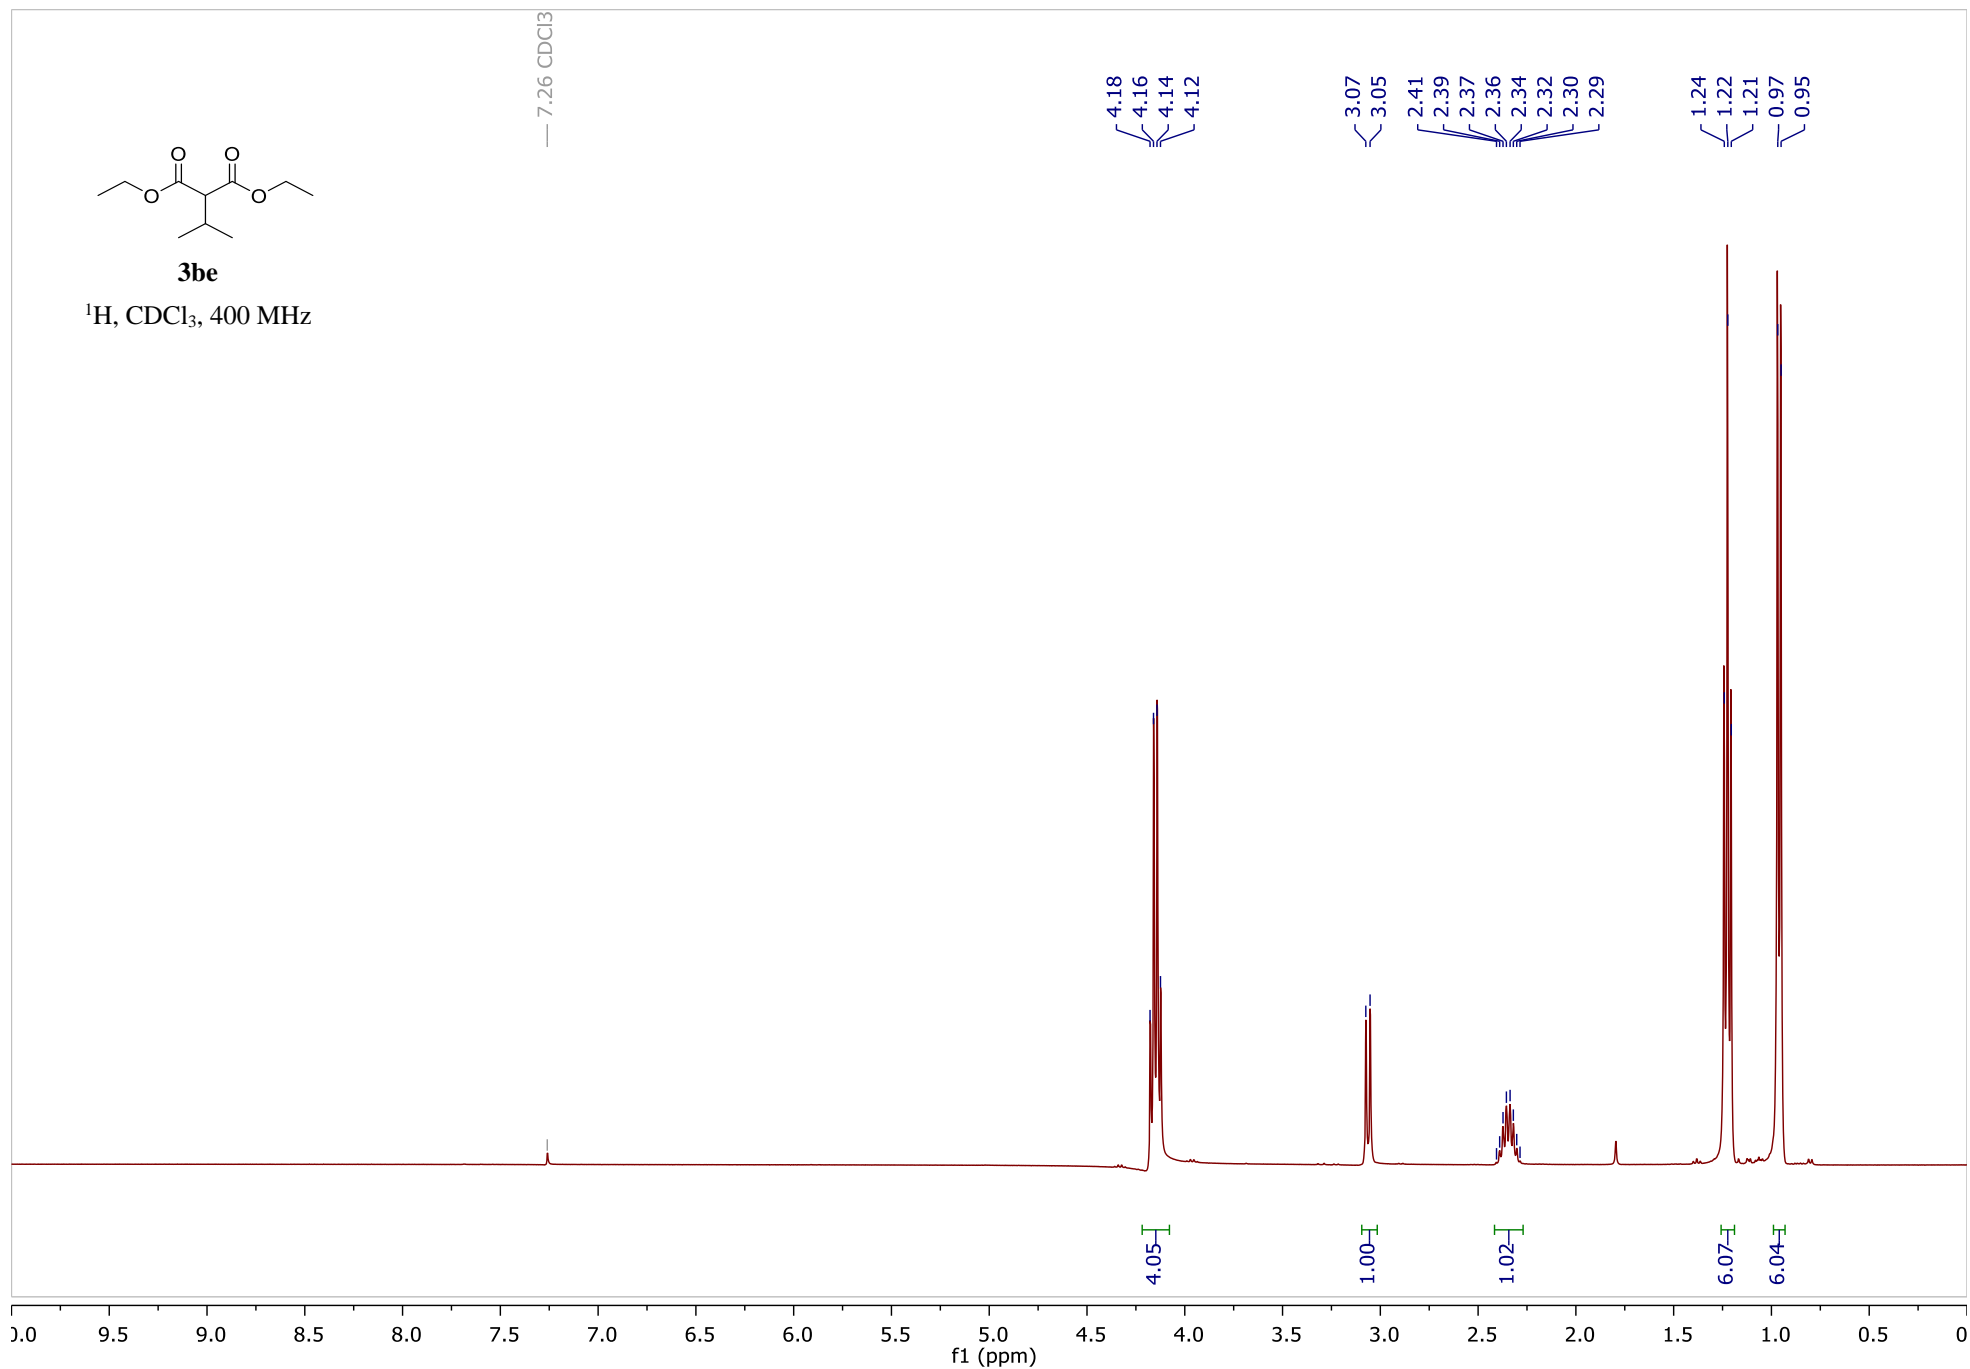

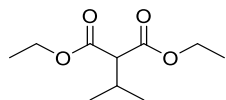

**3be**

$^{13}\text{C}\{^1\text{H}\}$ ,  $\text{CDCl}_3$ , 100 MHz

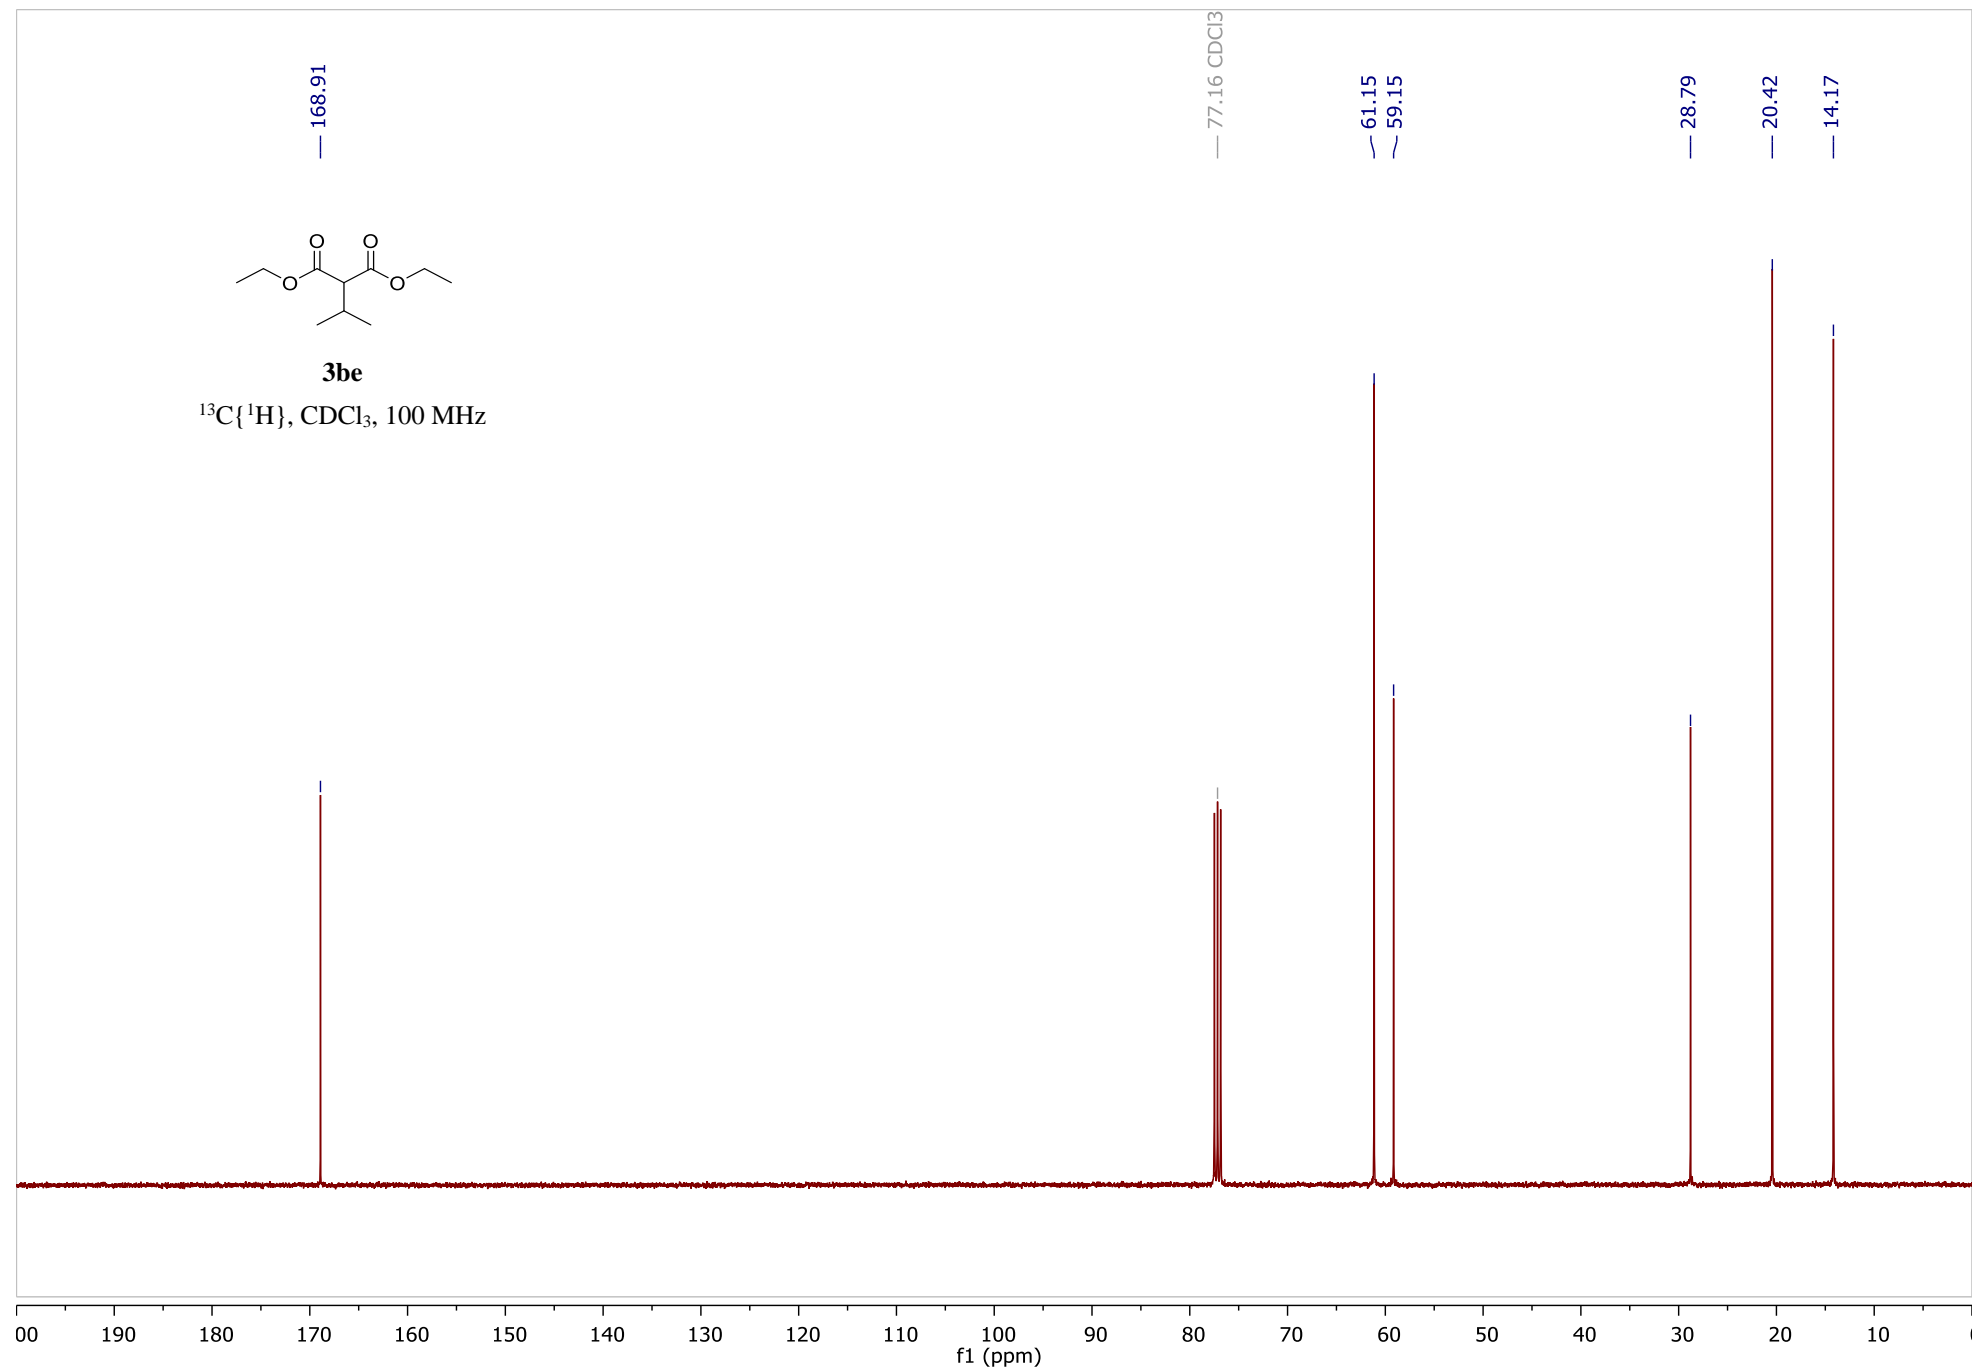

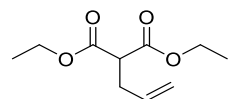

**3bf**

$^1\text{H}$ ,  $\text{CDCl}_3$ , 400 MHz

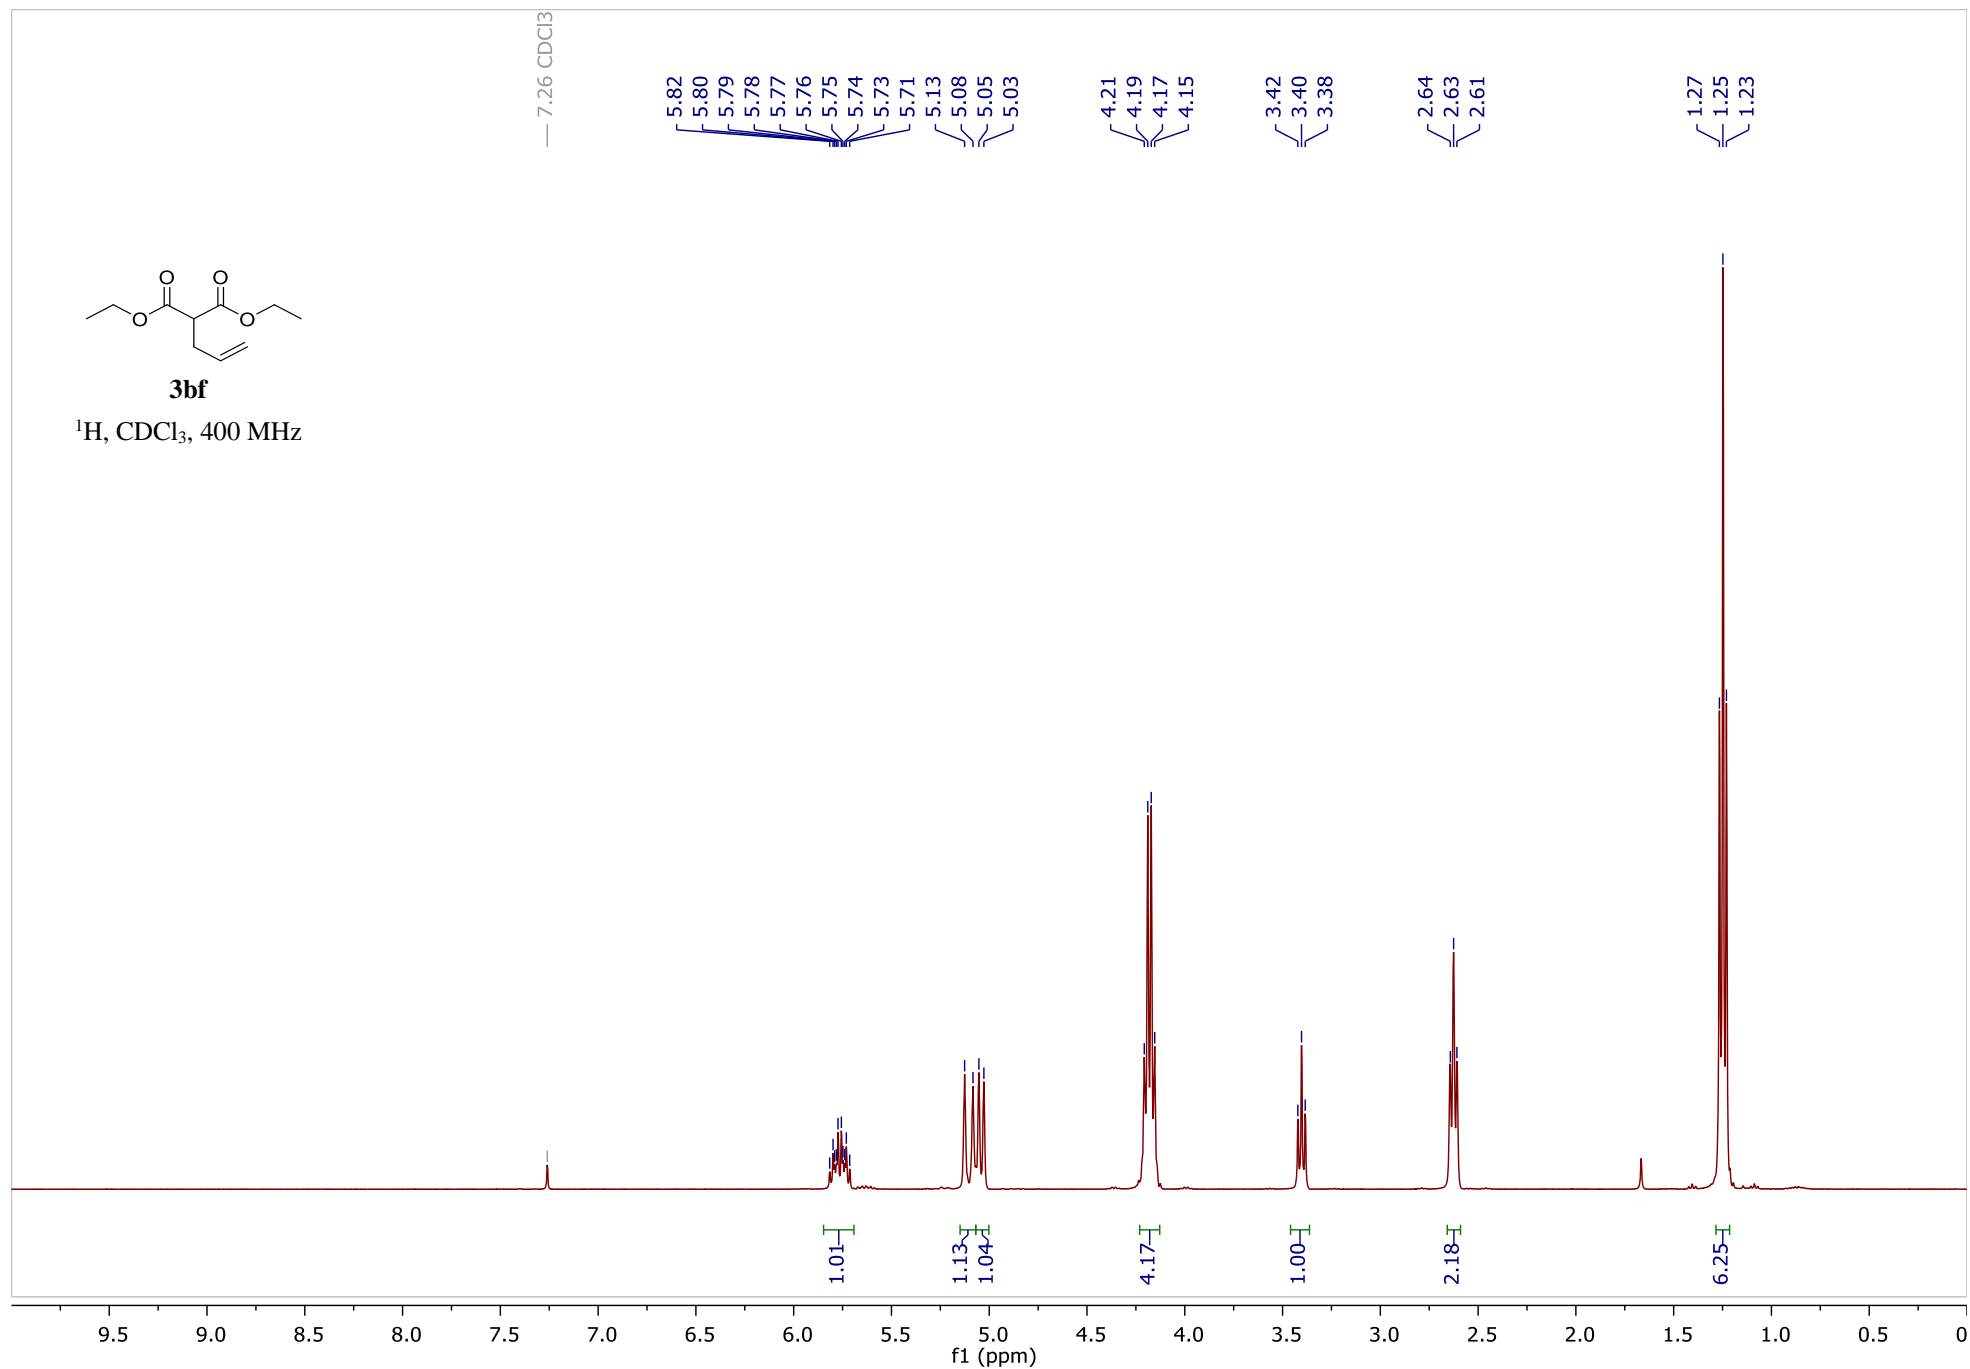

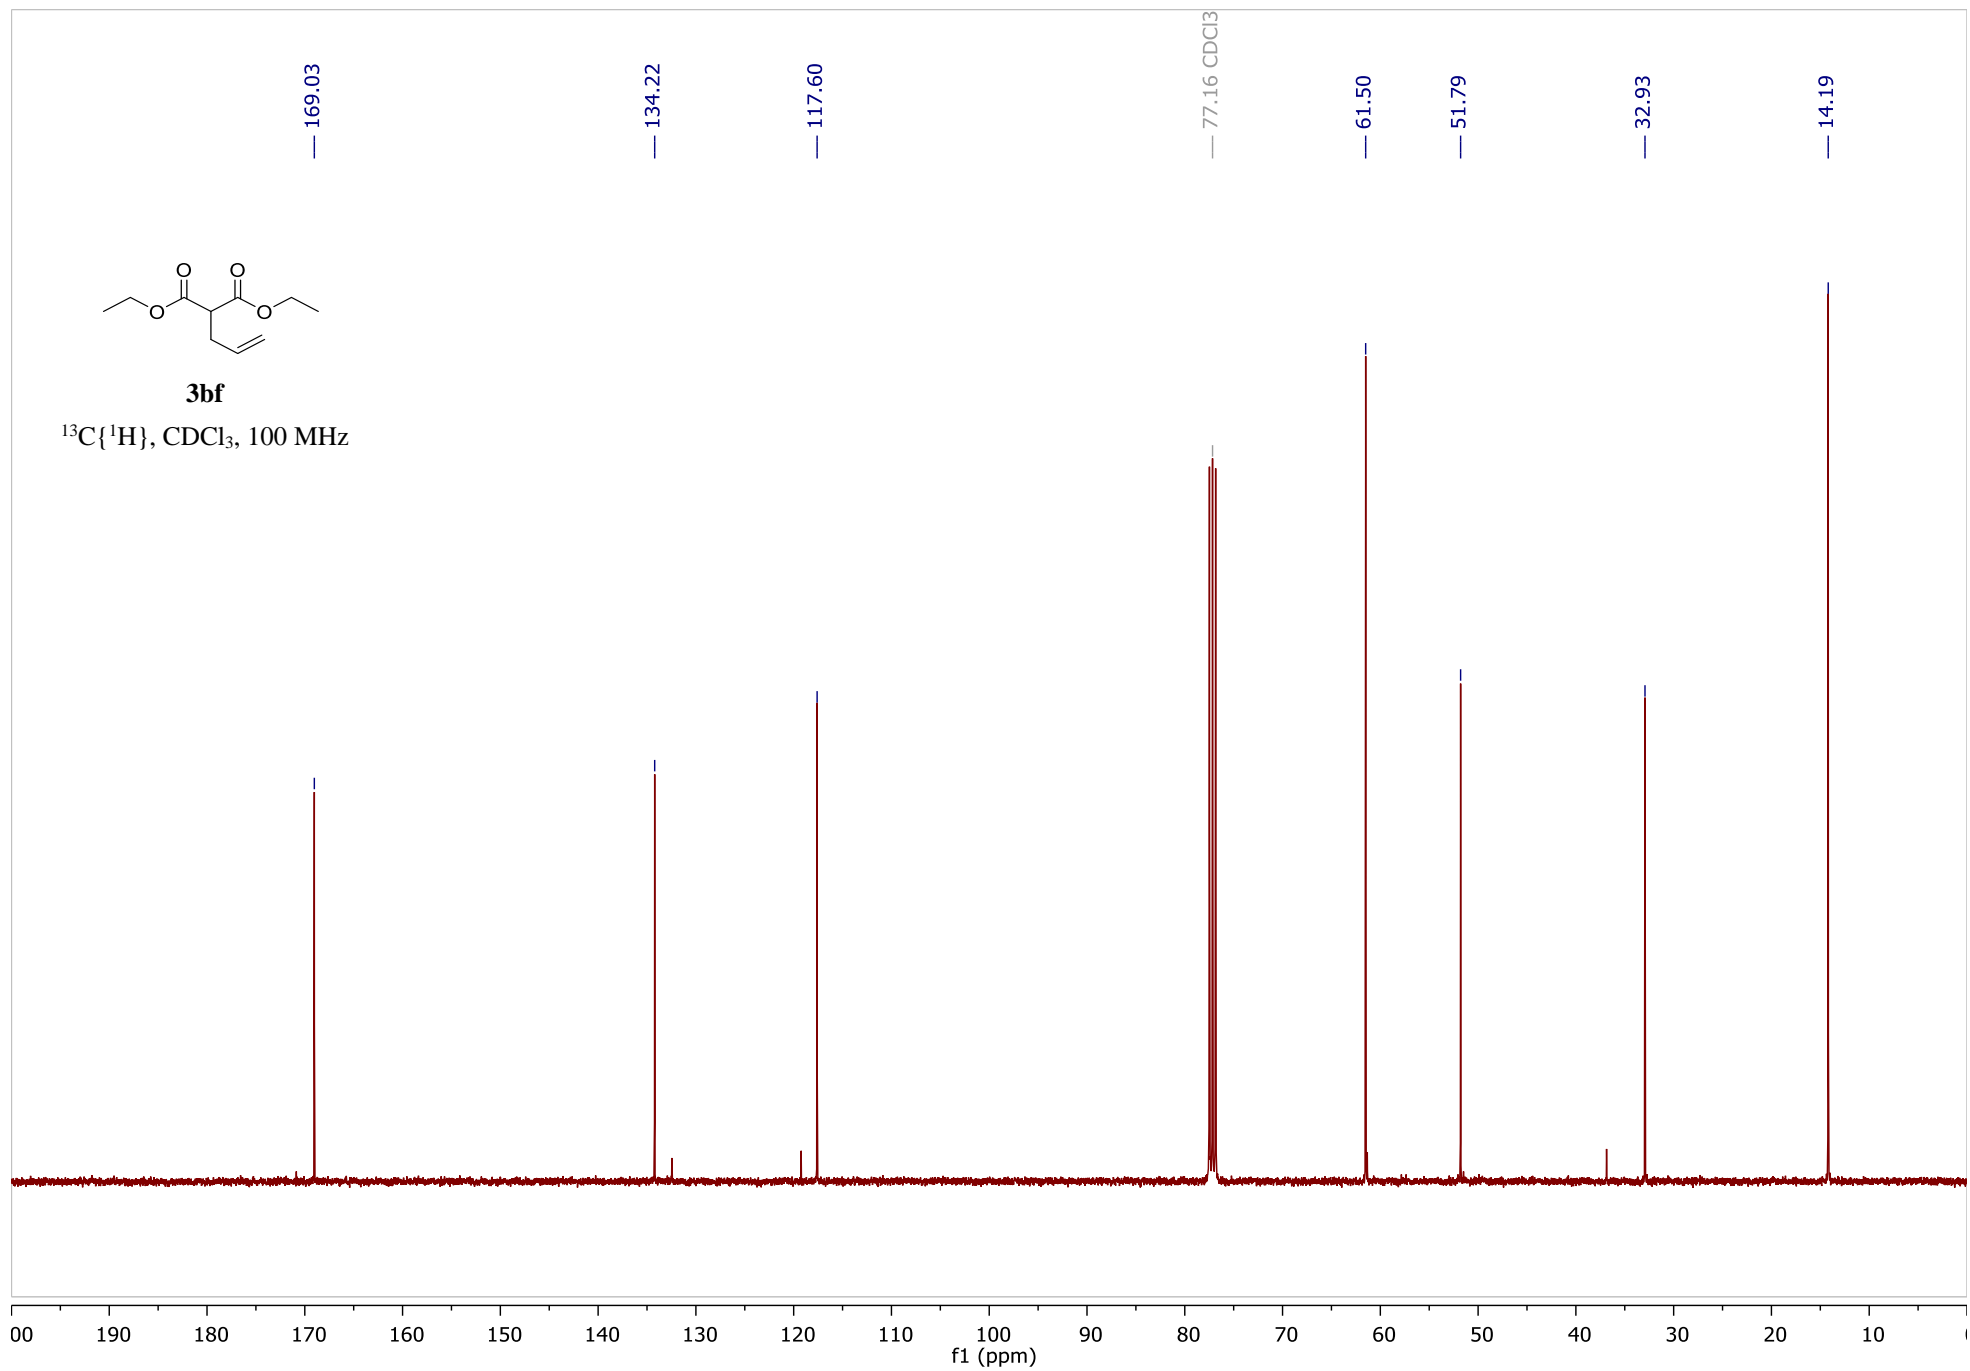

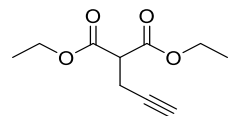

**3bg**

$^1\text{H}$ ,  $\text{CDCl}_3$ , 400 MHz

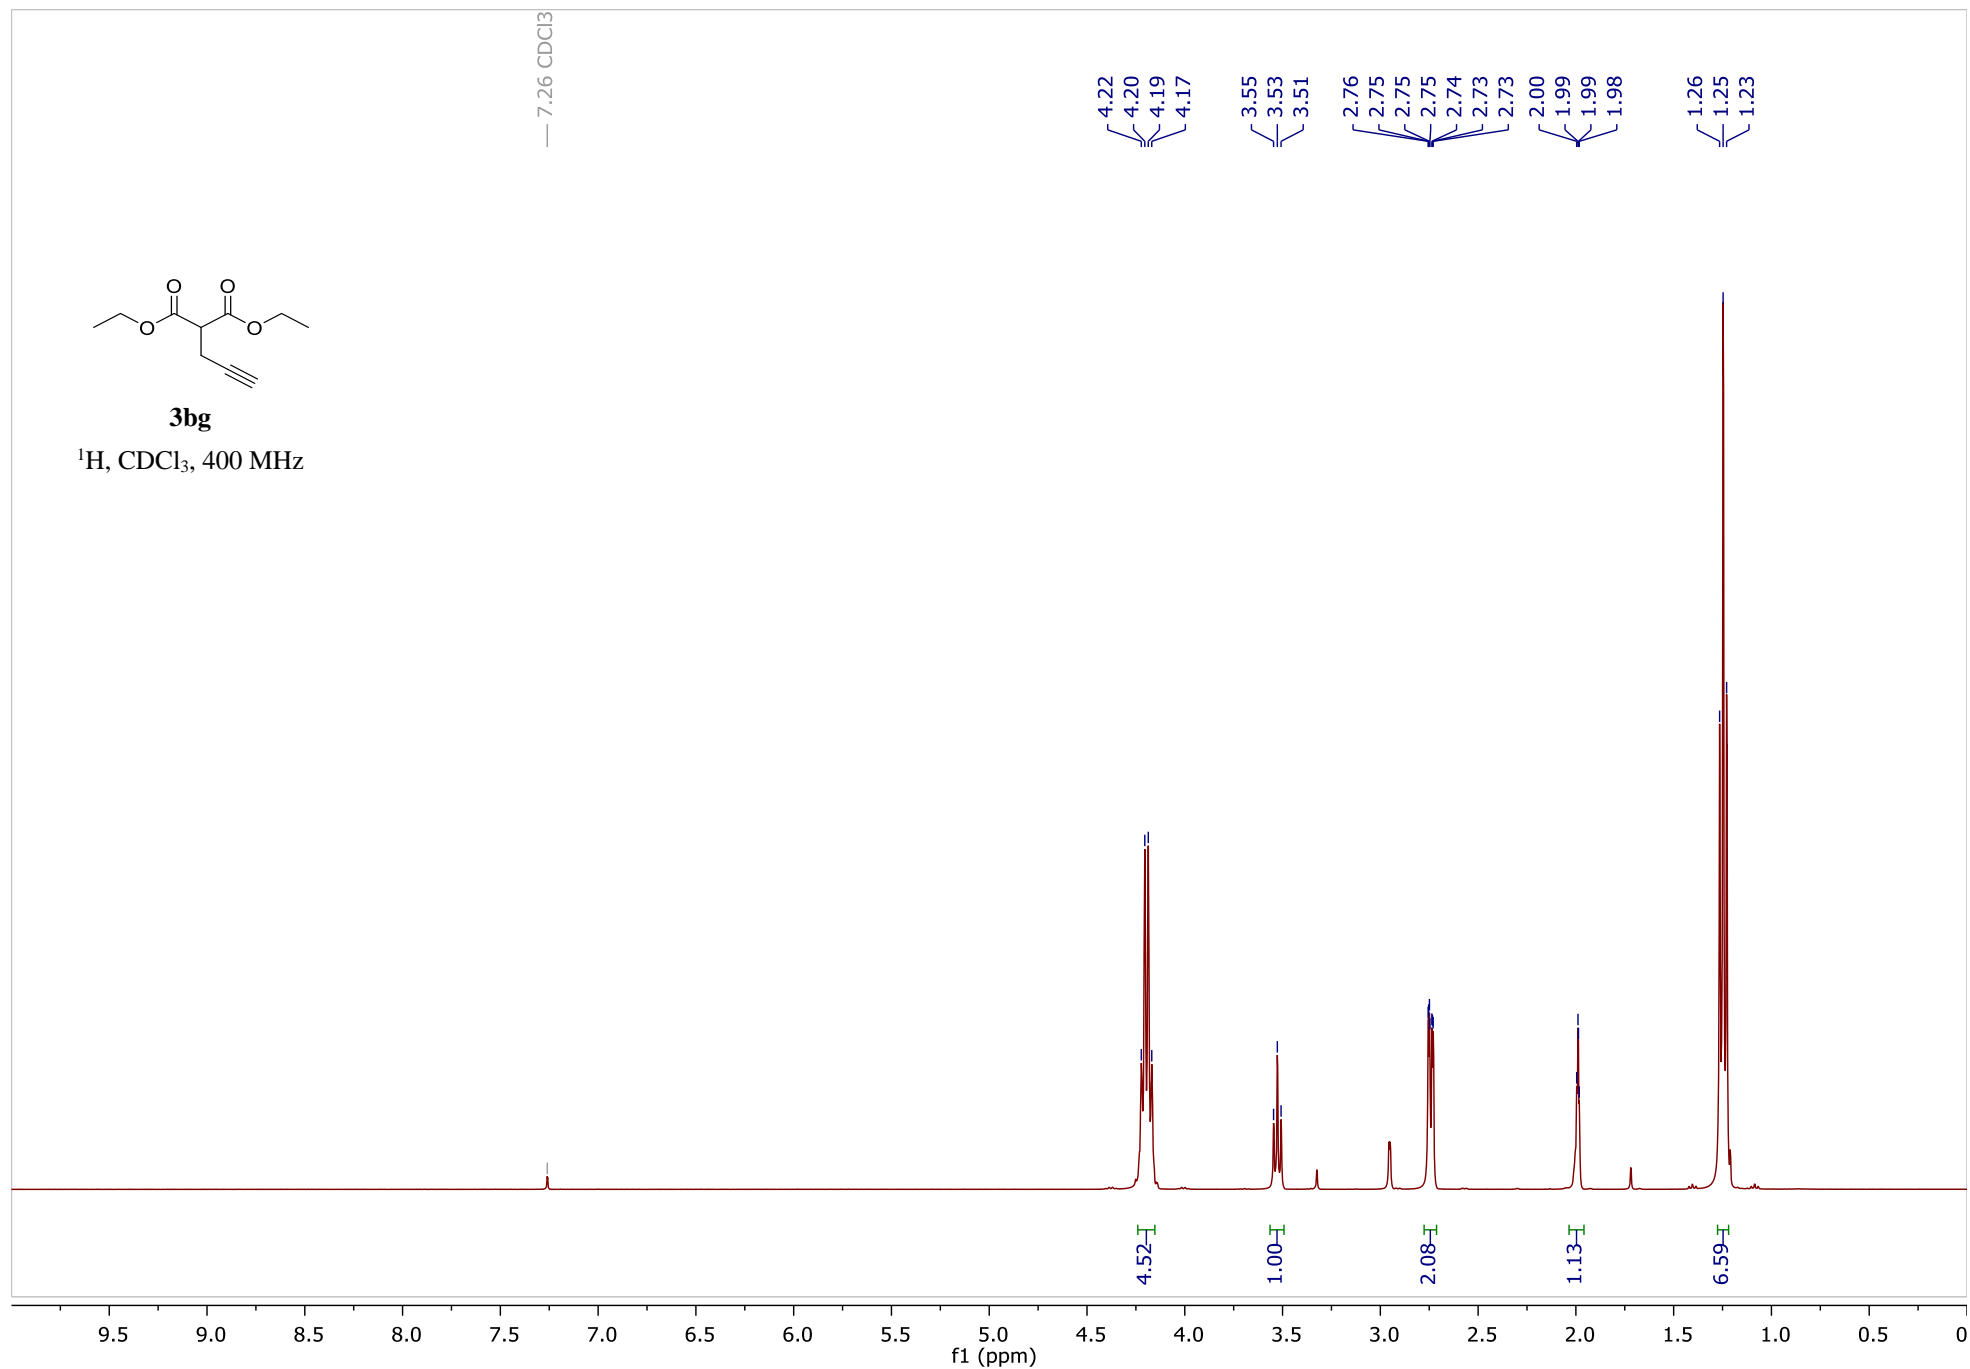

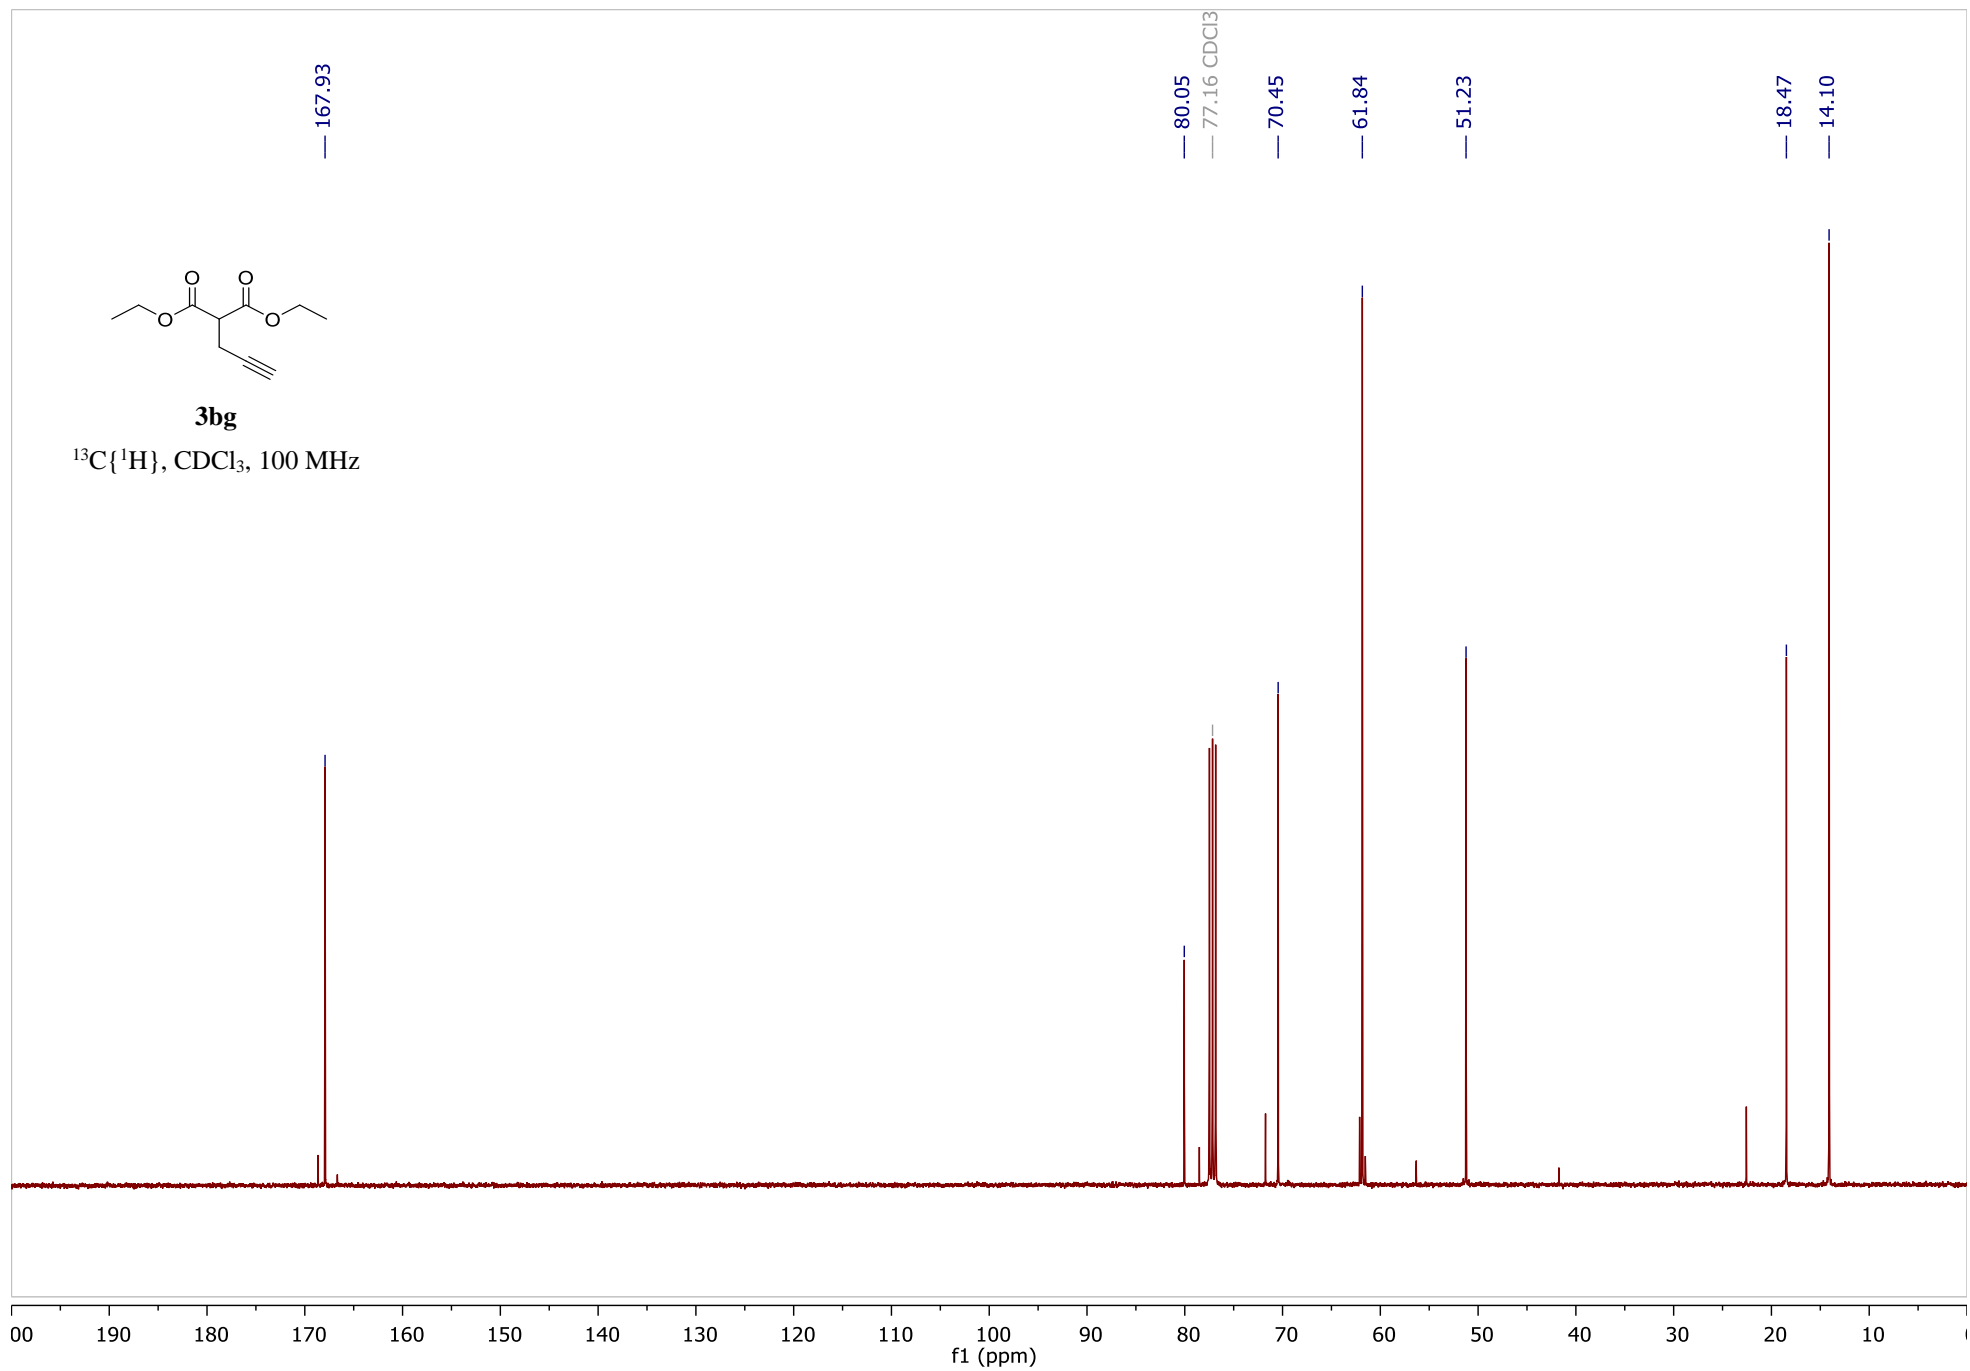

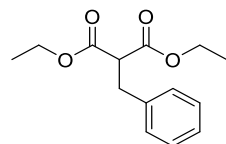

**3bh**

$^1\text{H}$ ,  $\text{CDCl}_3$ , 400 MHz

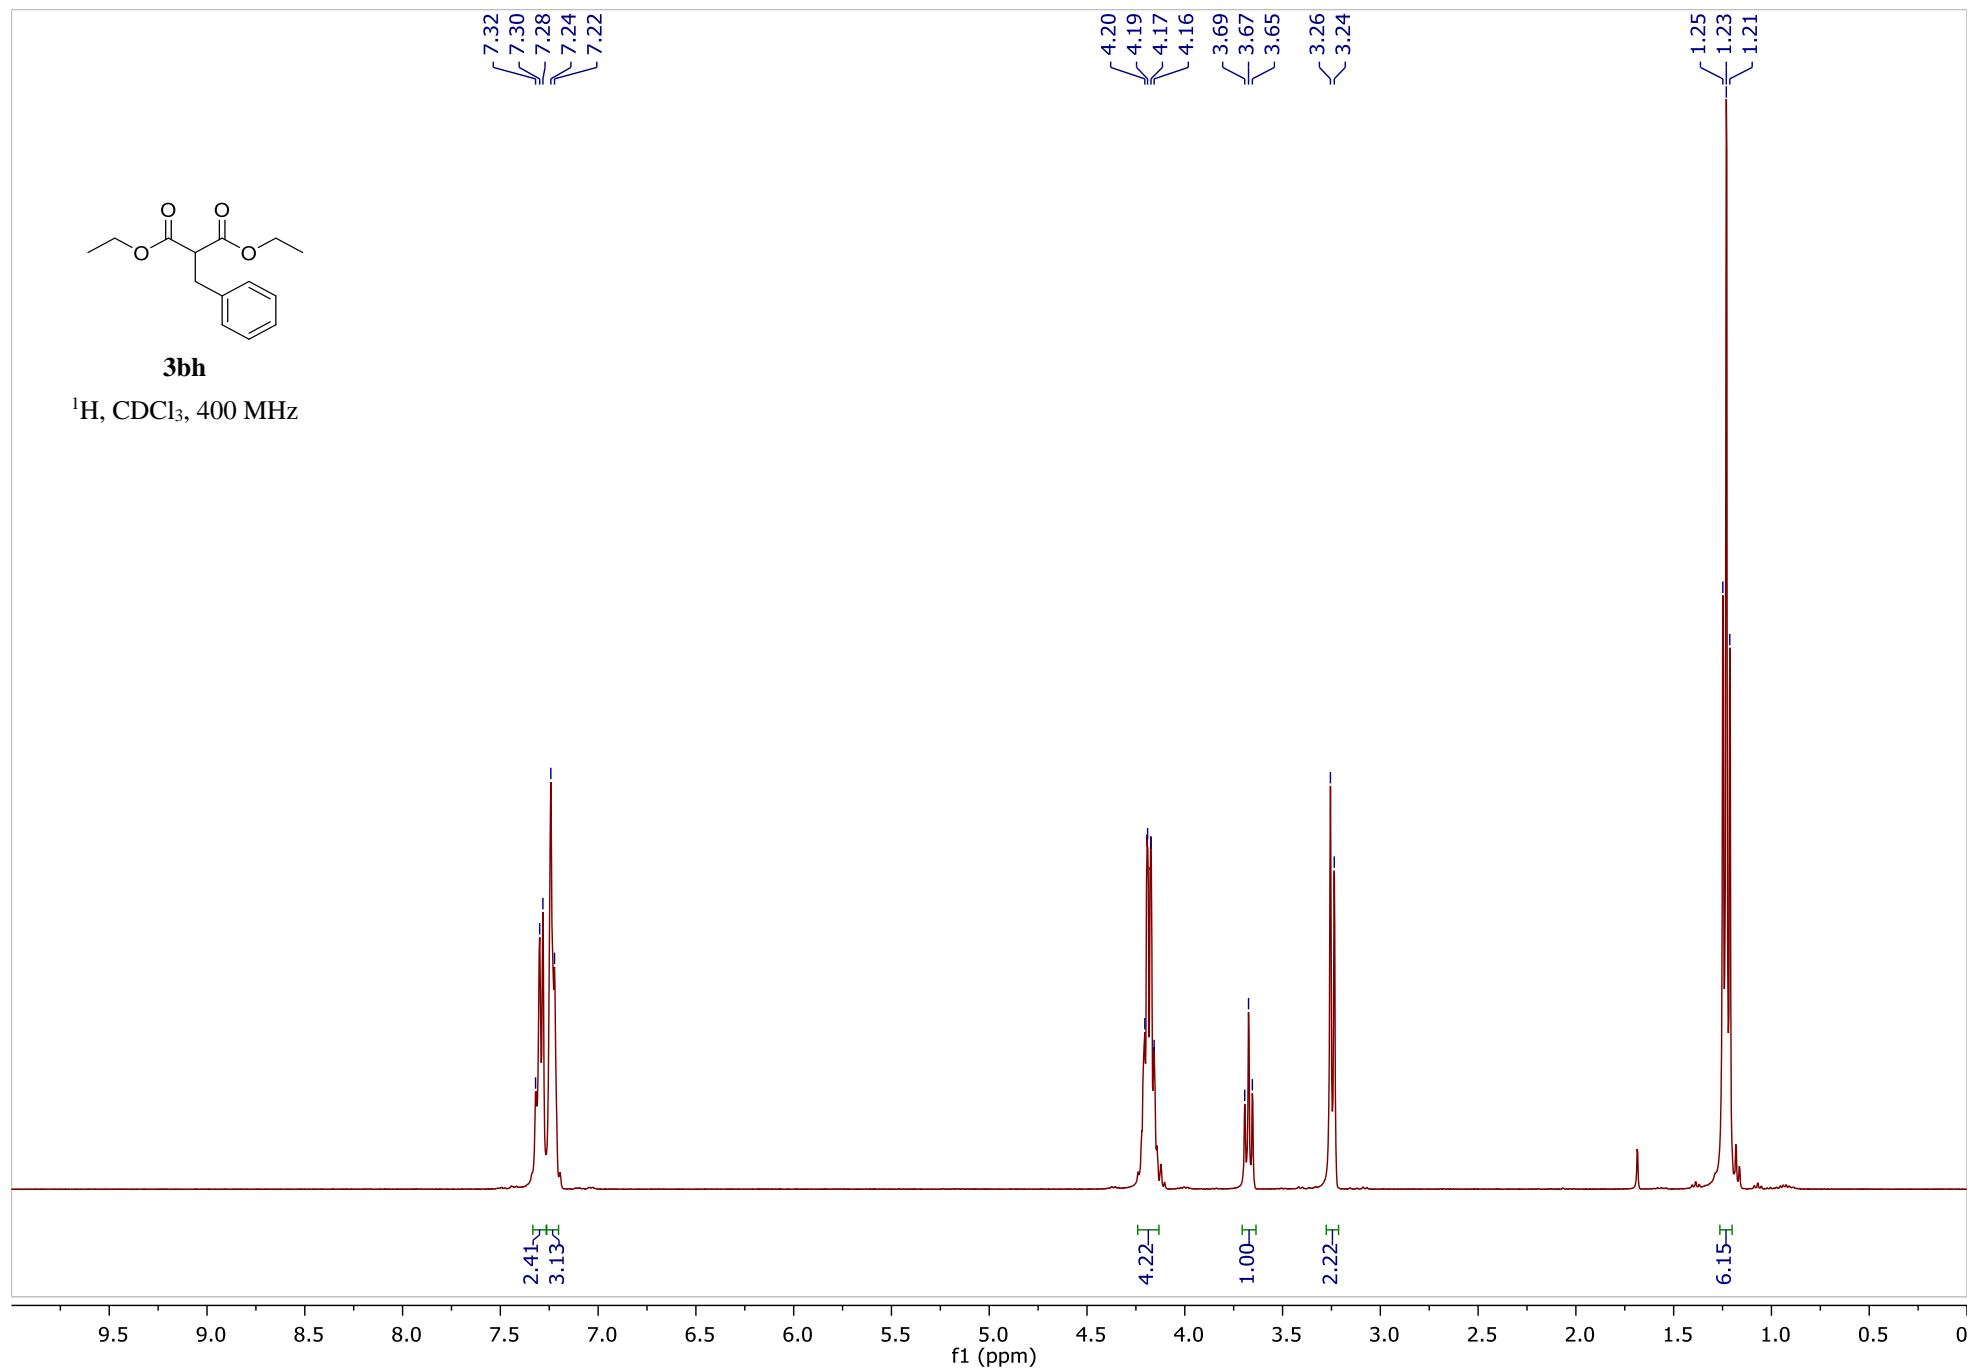



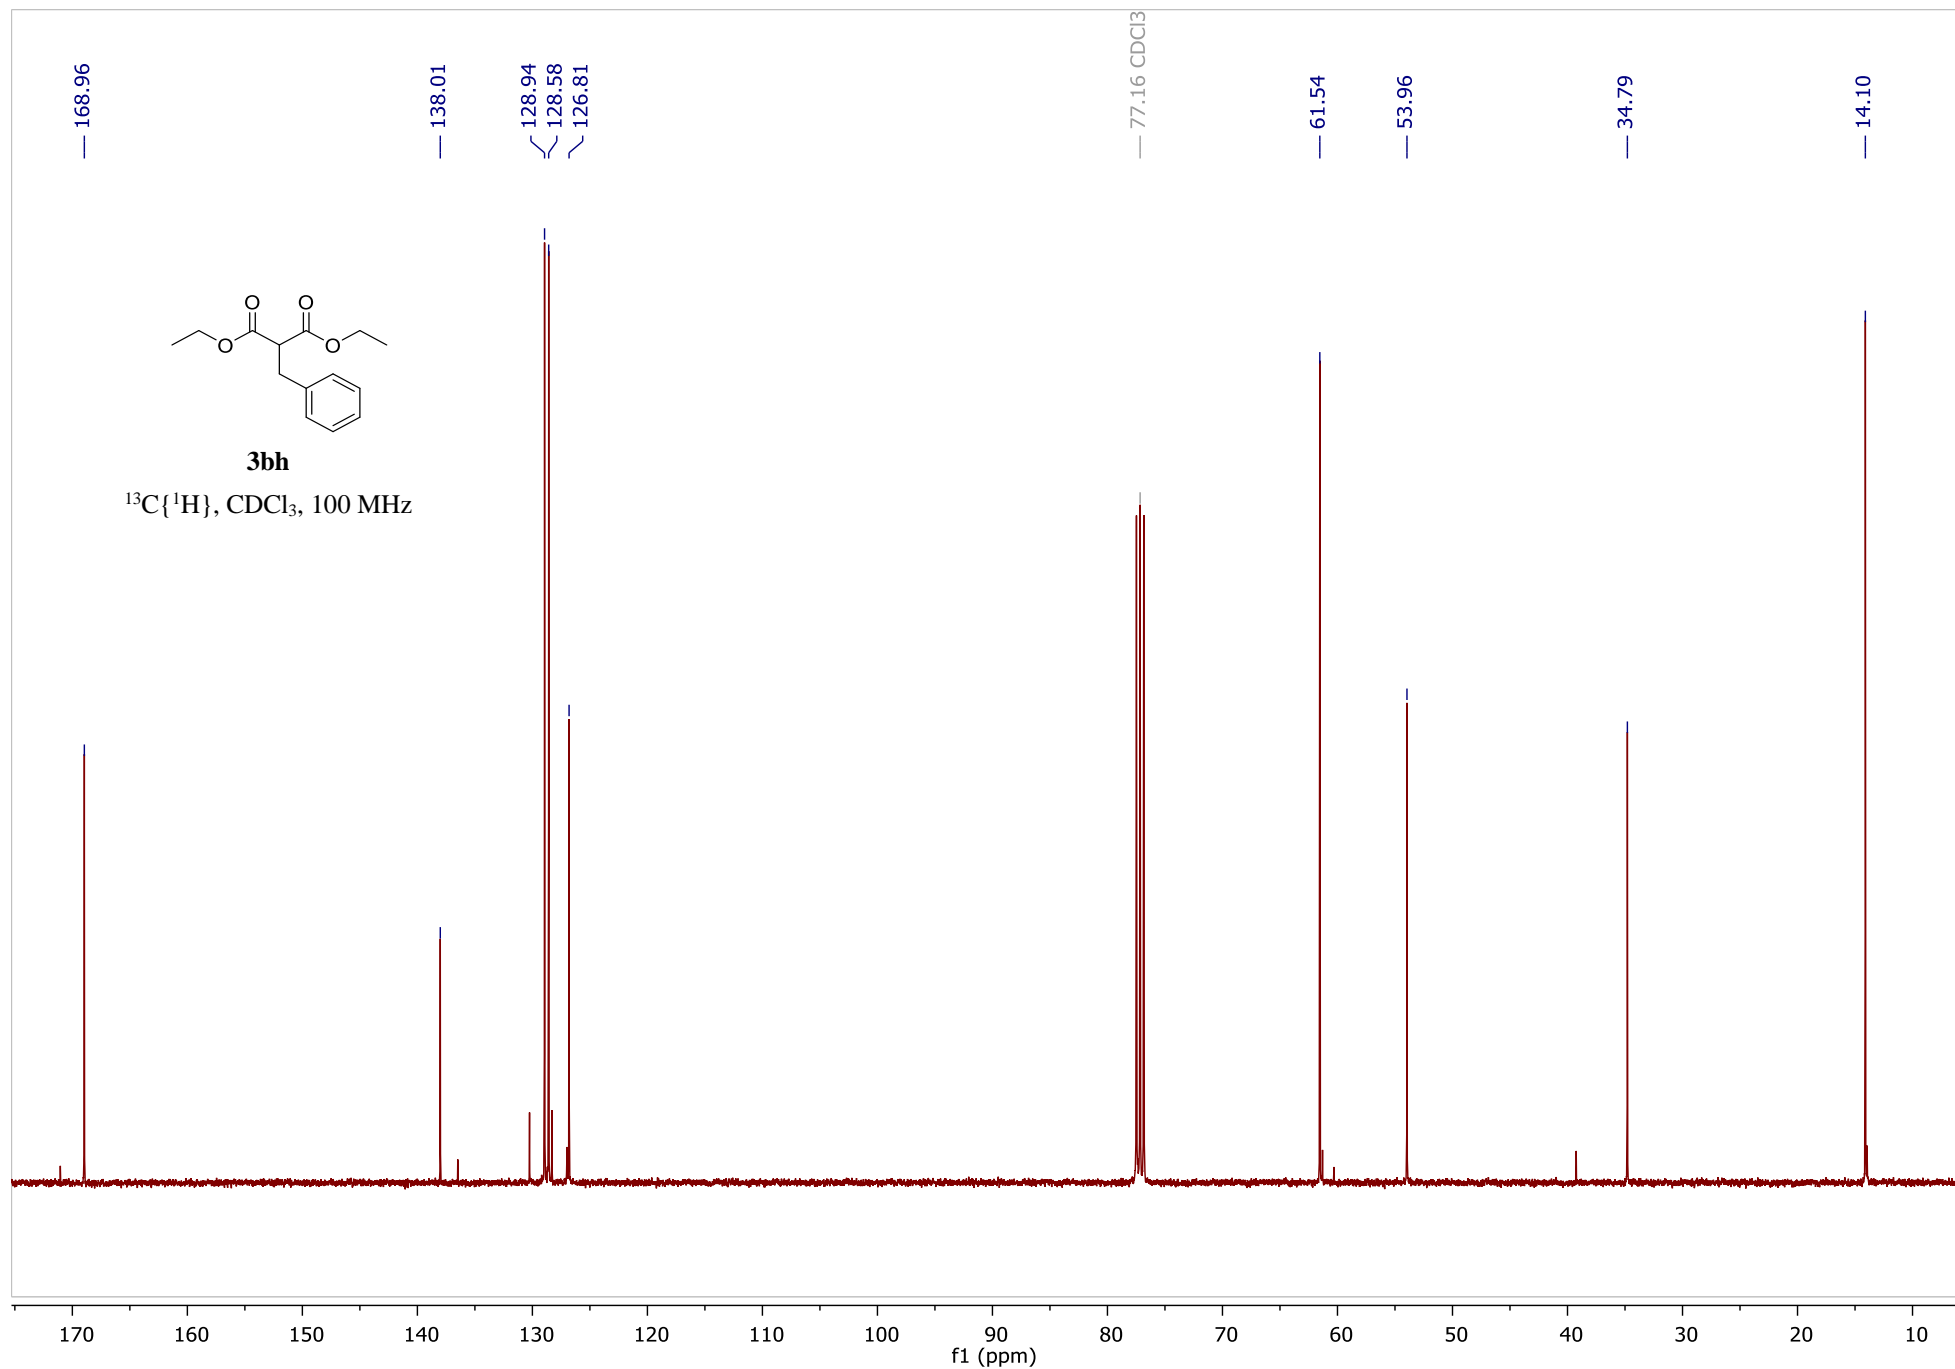

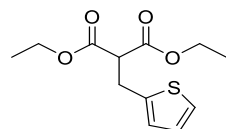

**3bi**

$^1\text{H}$ ,  $\text{CDCl}_3$ , 400 MHz

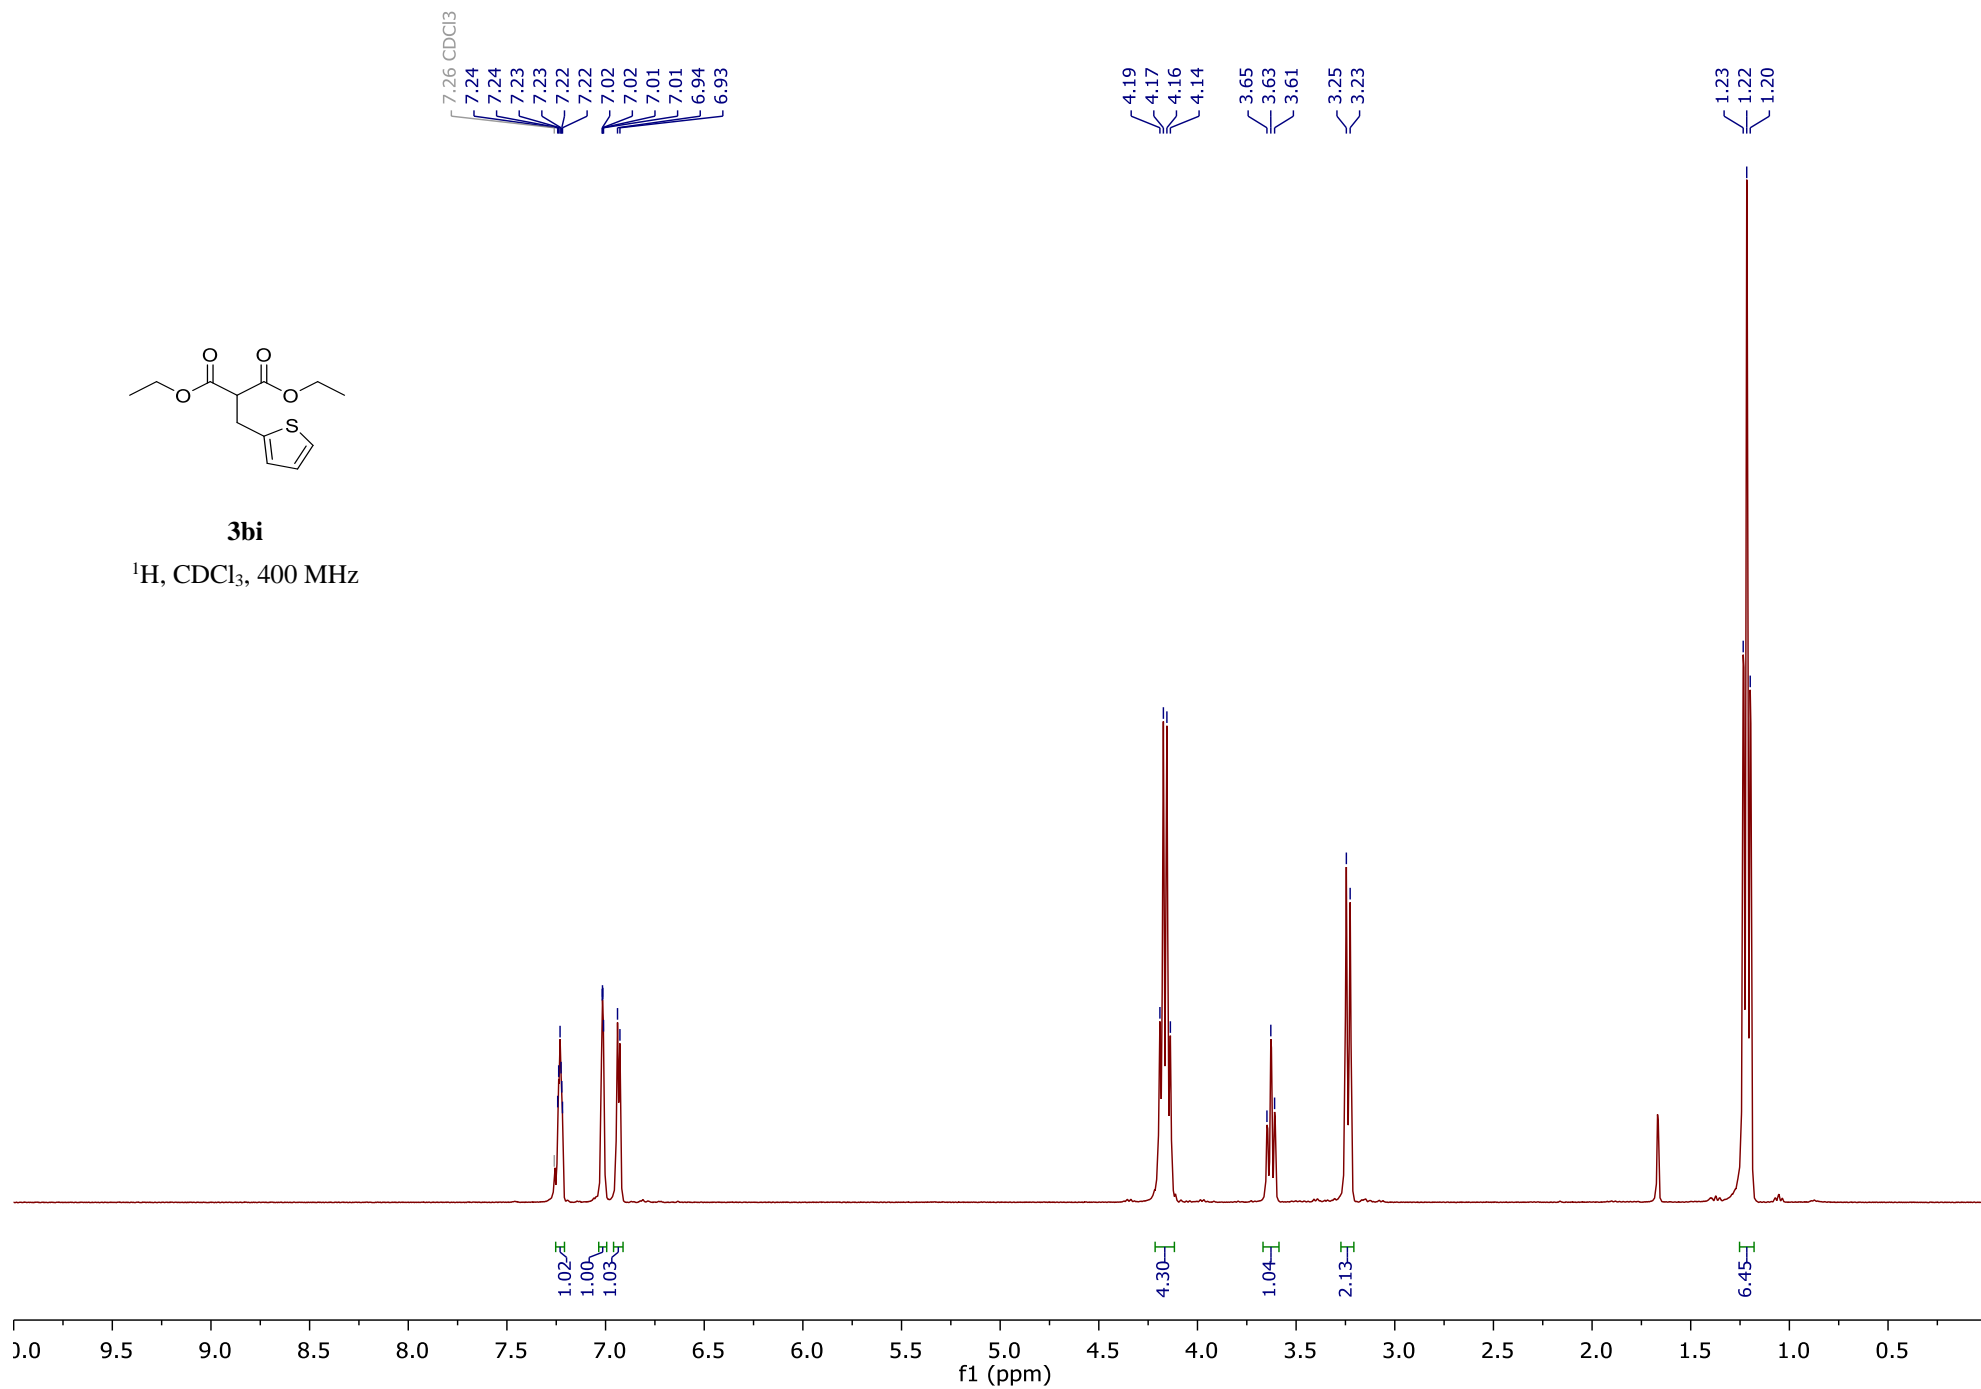

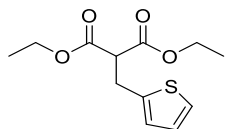

**3bi**

$^{13}\text{C}\{^1\text{H}\}$ ,  $\text{CDCl}_3$ , 100 MHz

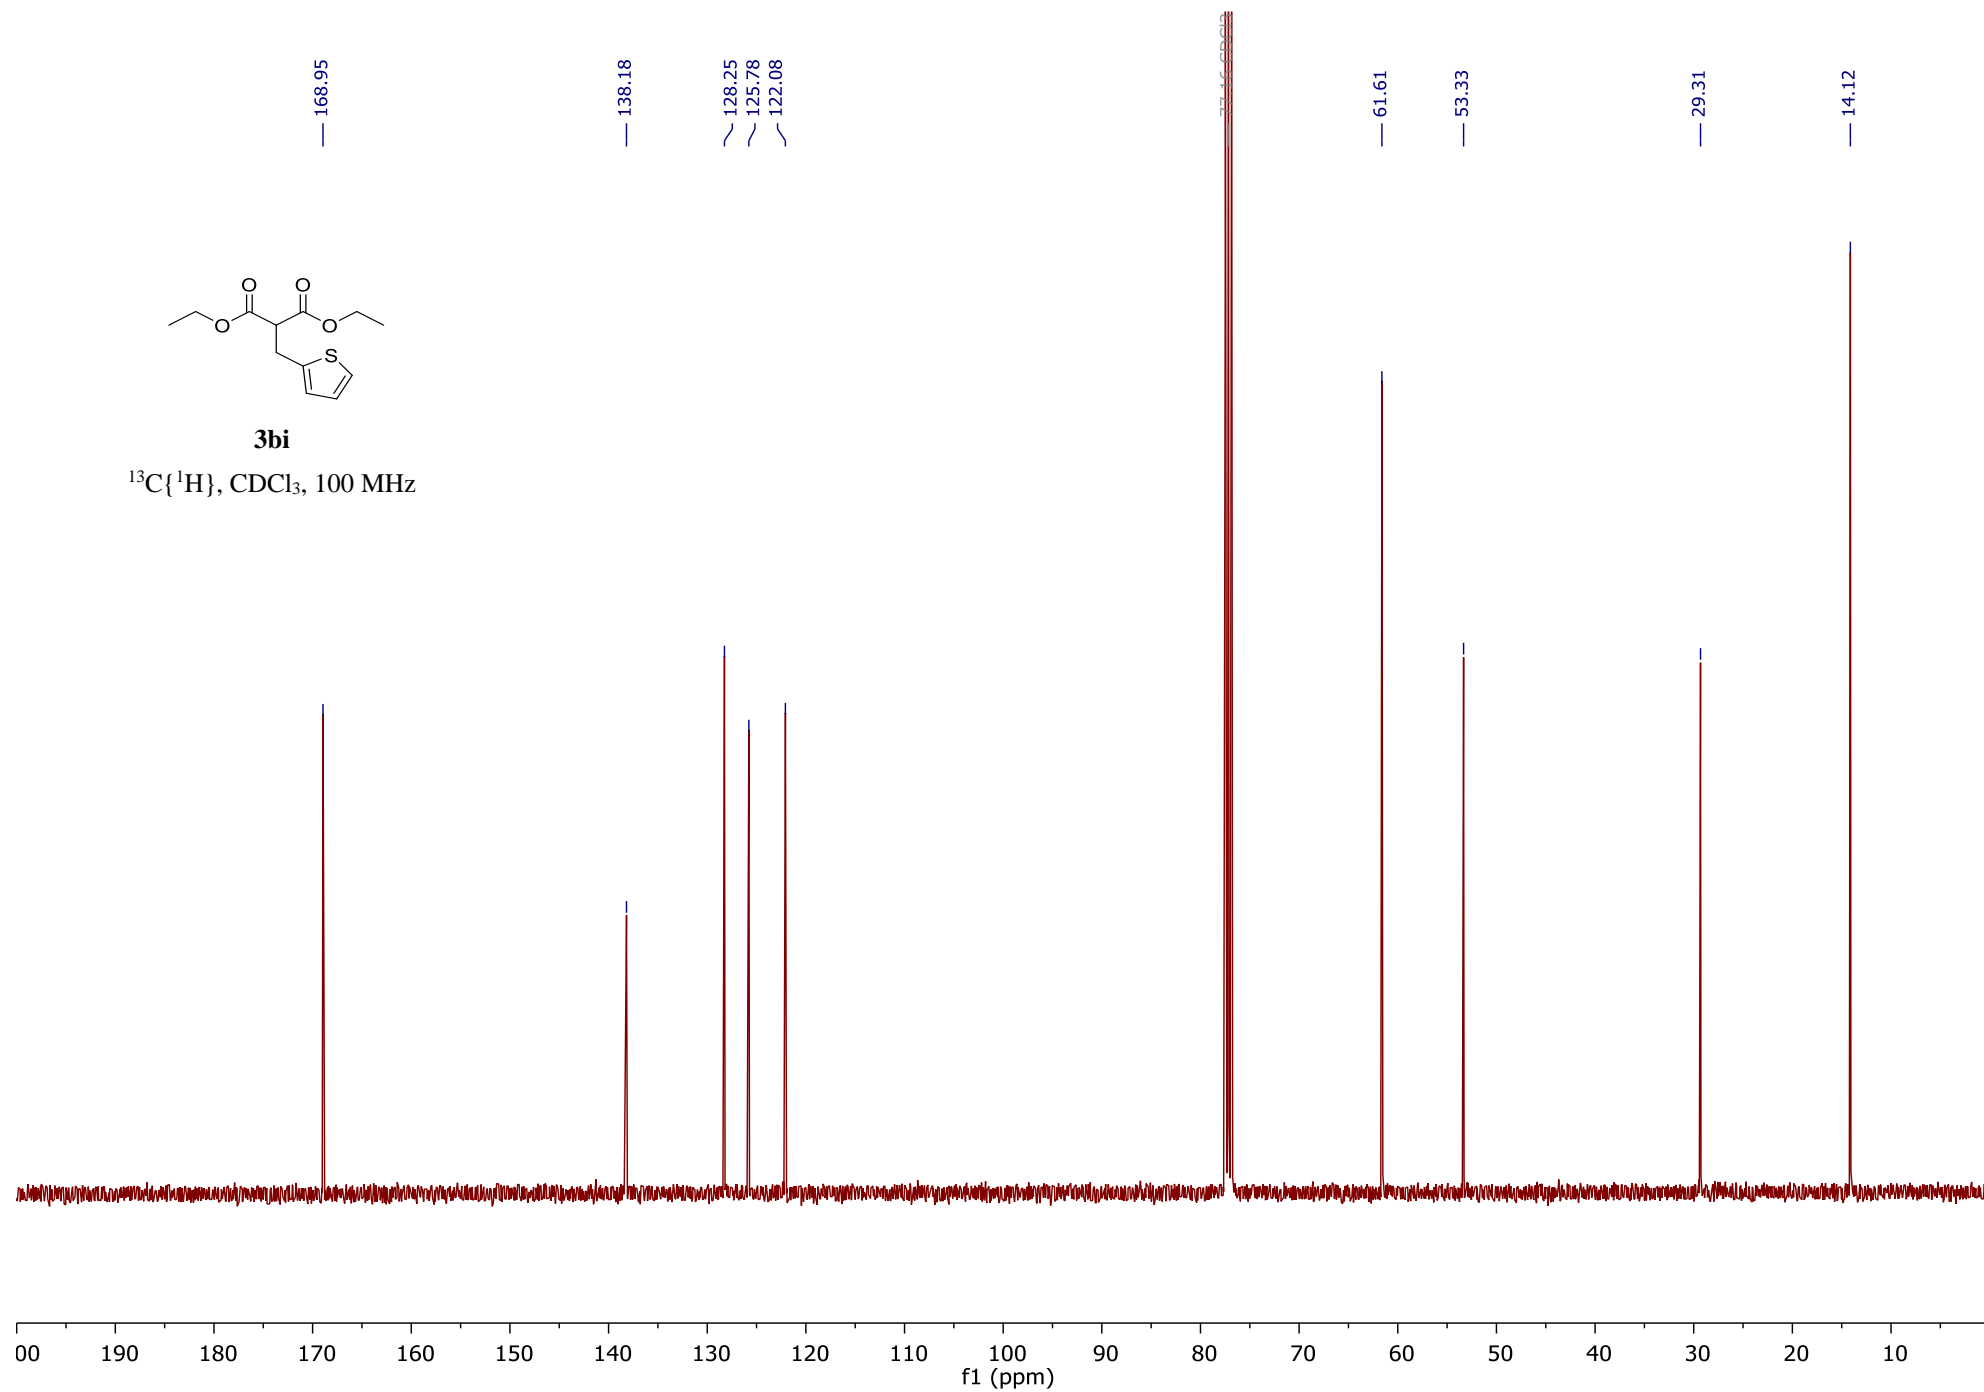

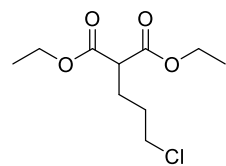

**3bj**

<sup>1</sup>H, CDCl<sub>3</sub>, 400 MHz

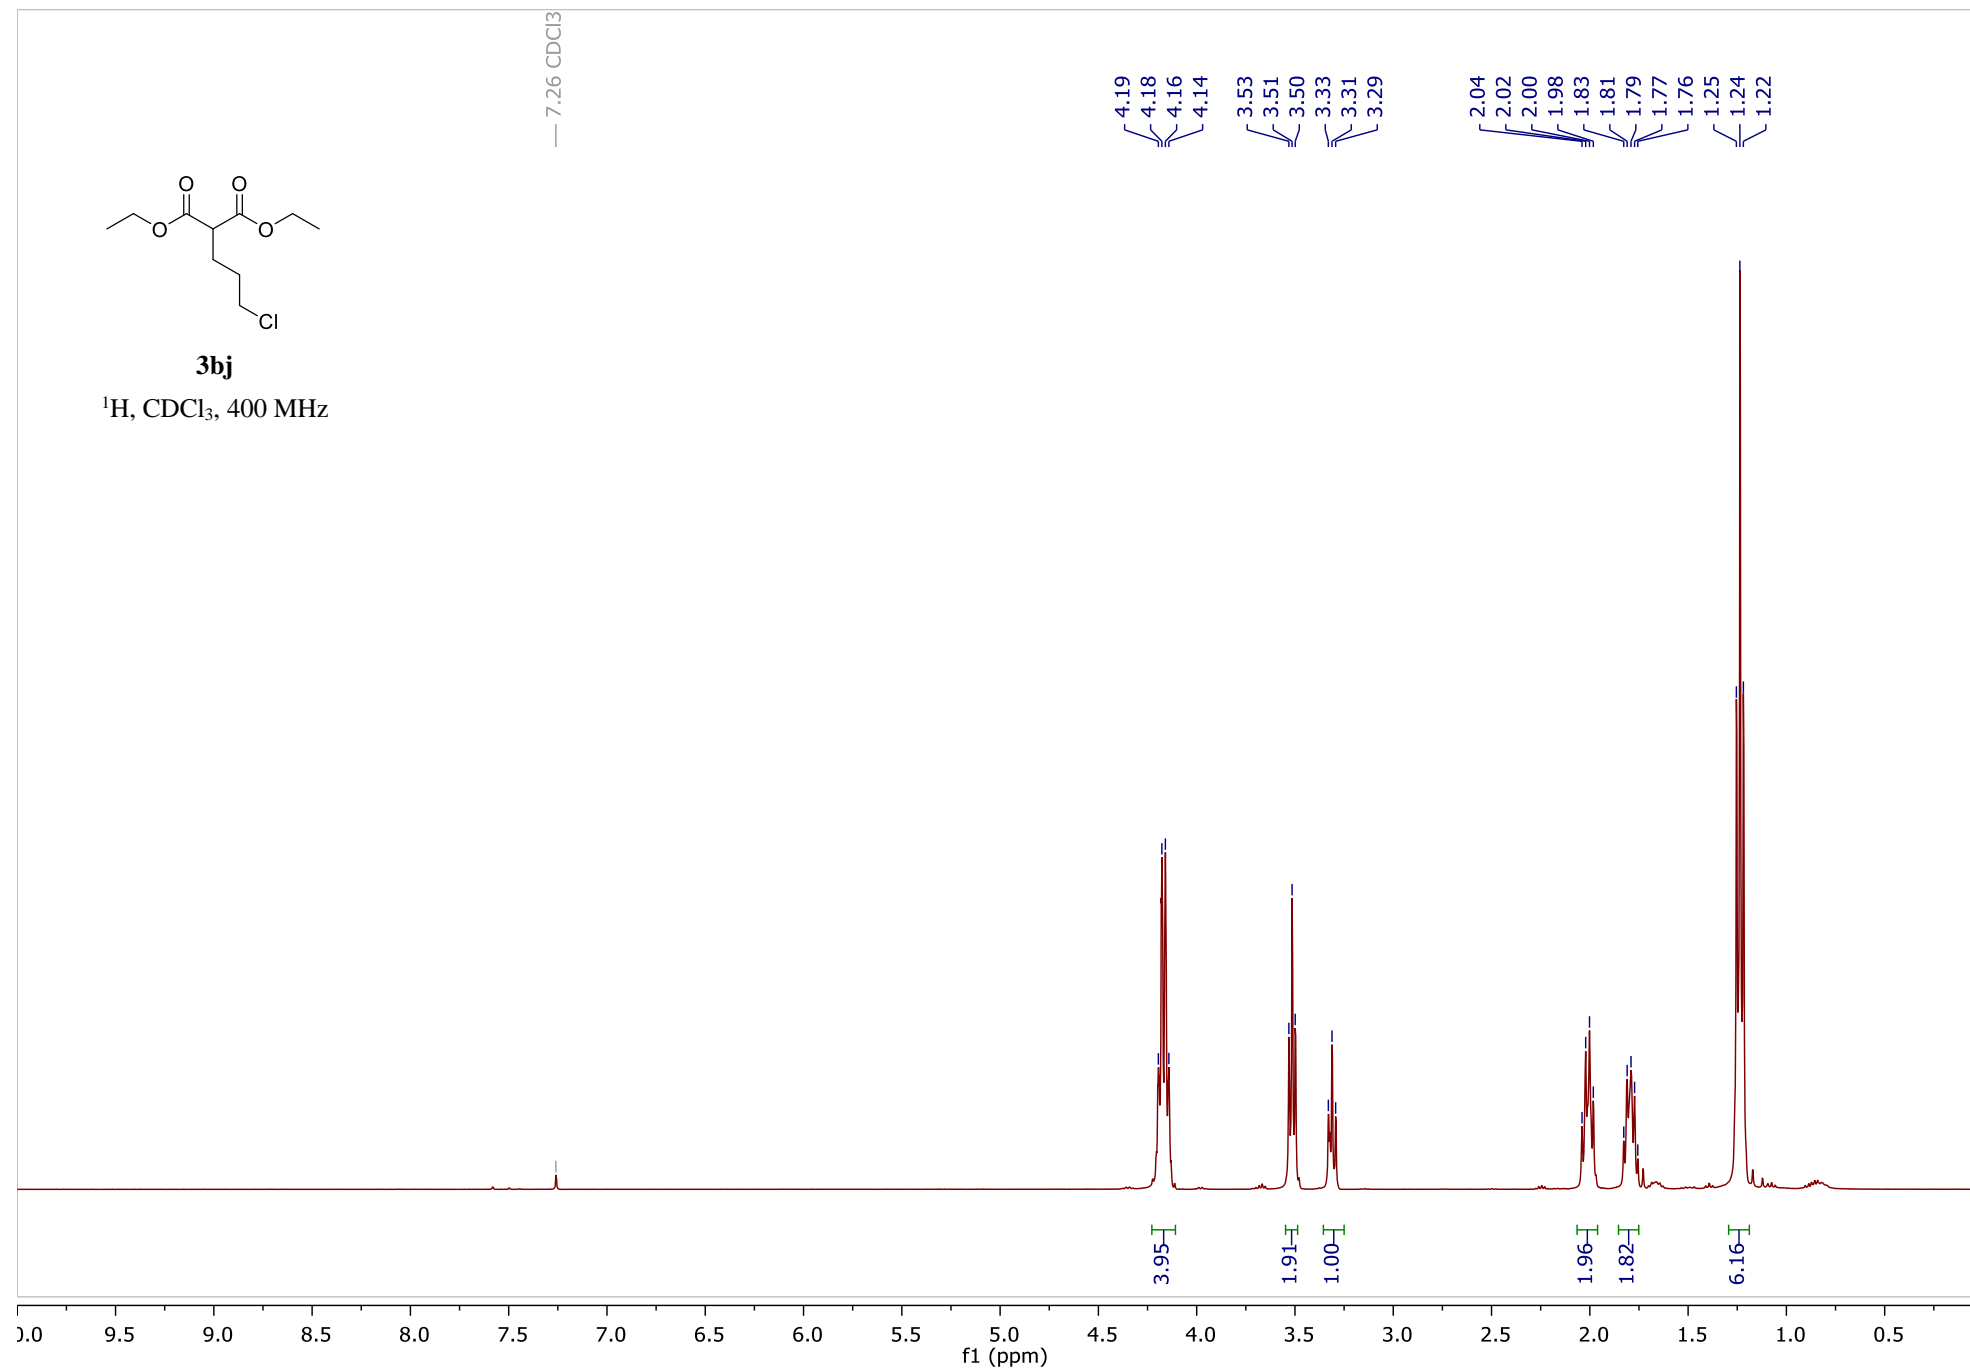

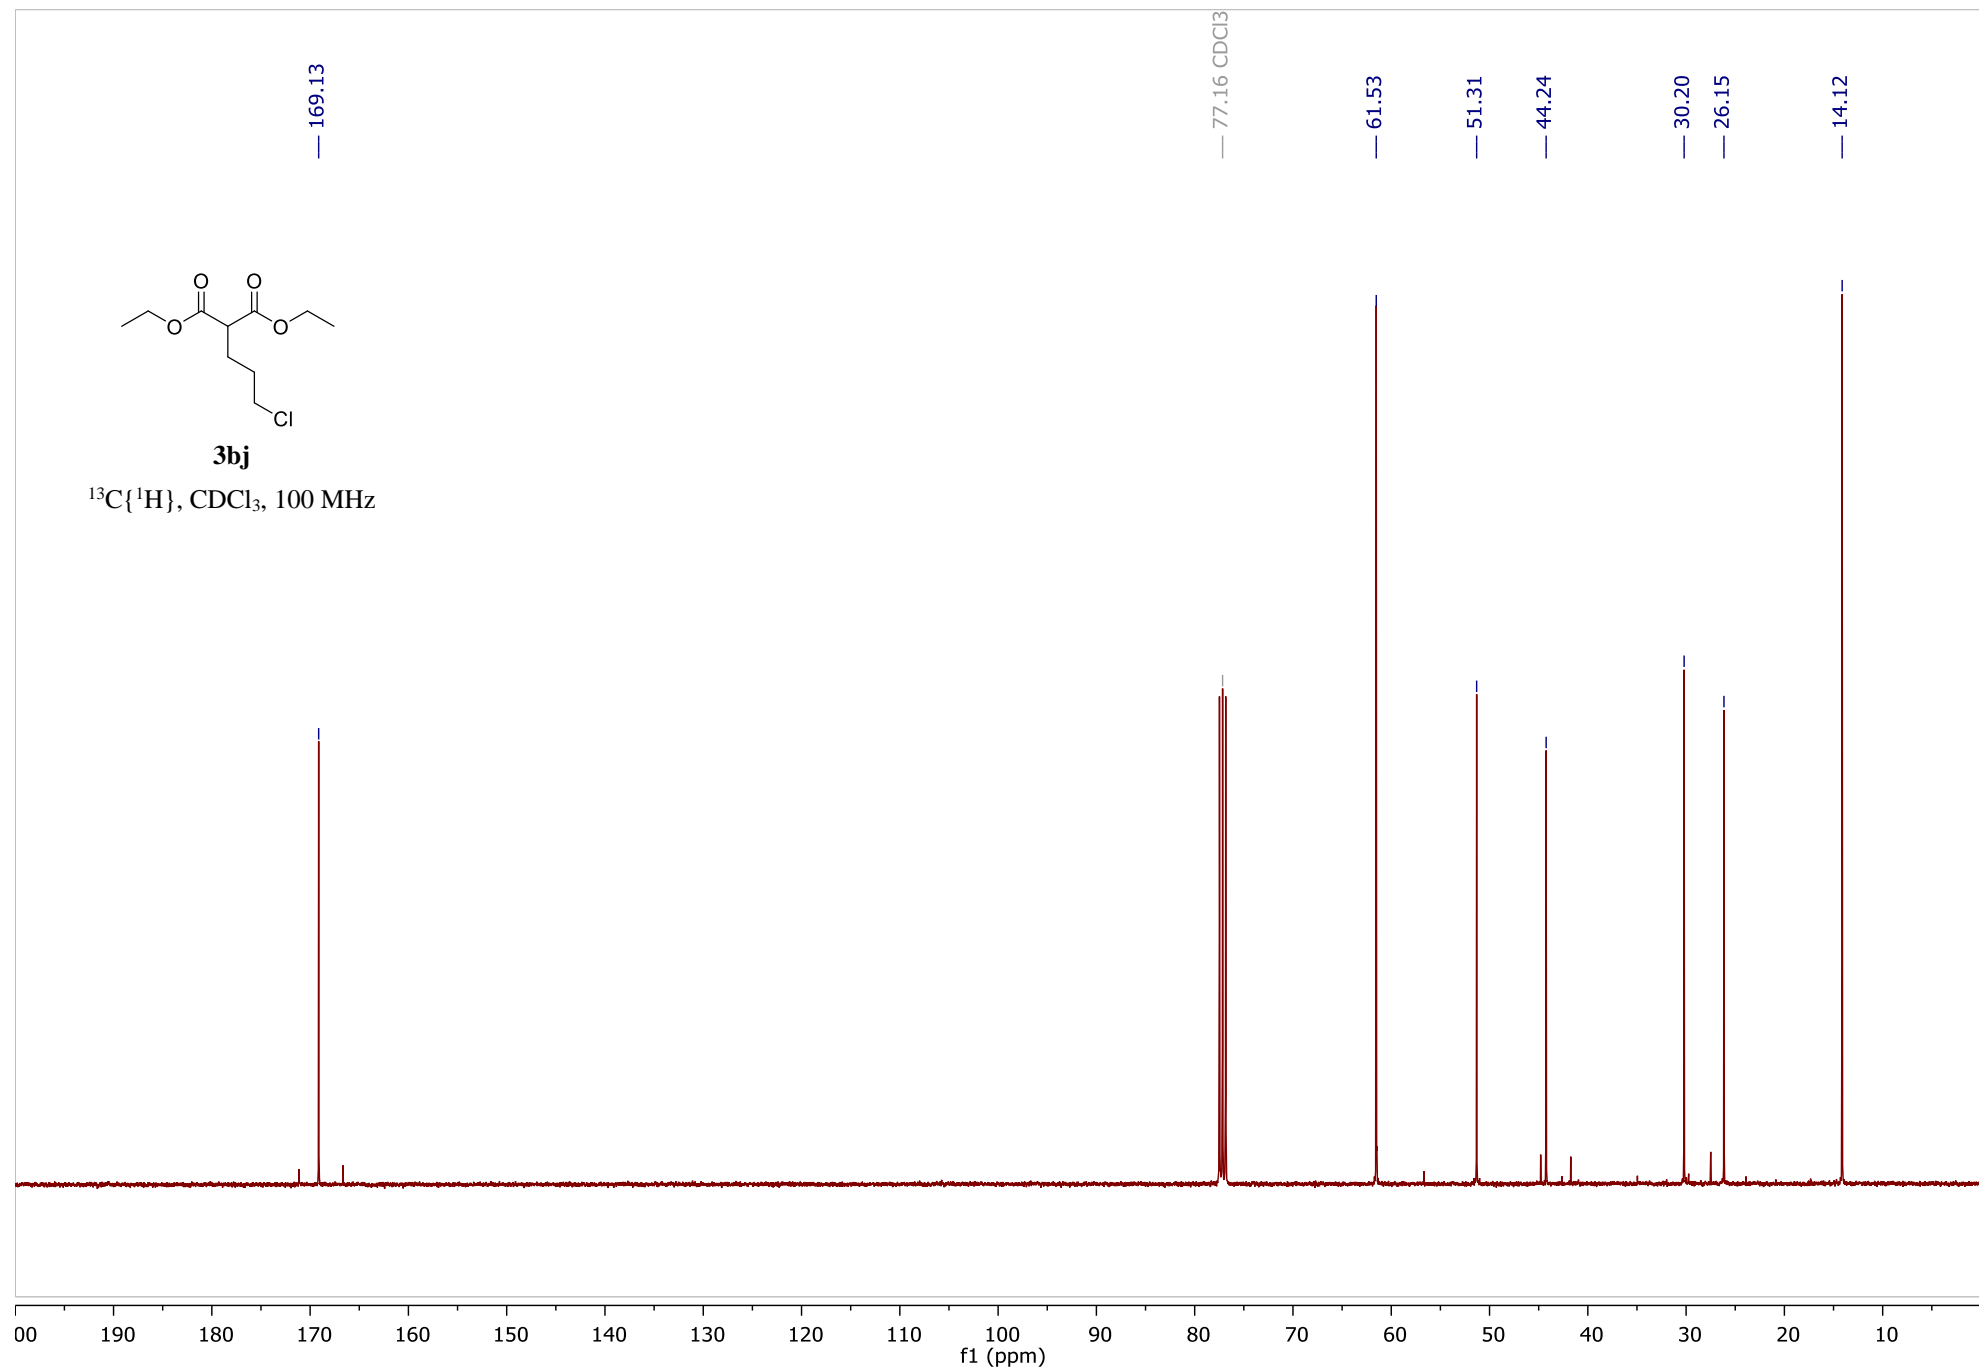

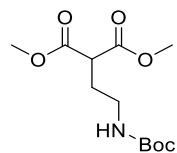

**3ak**

$^1\text{H}$ ,  $\text{CDCl}_3$ , 400 MHz

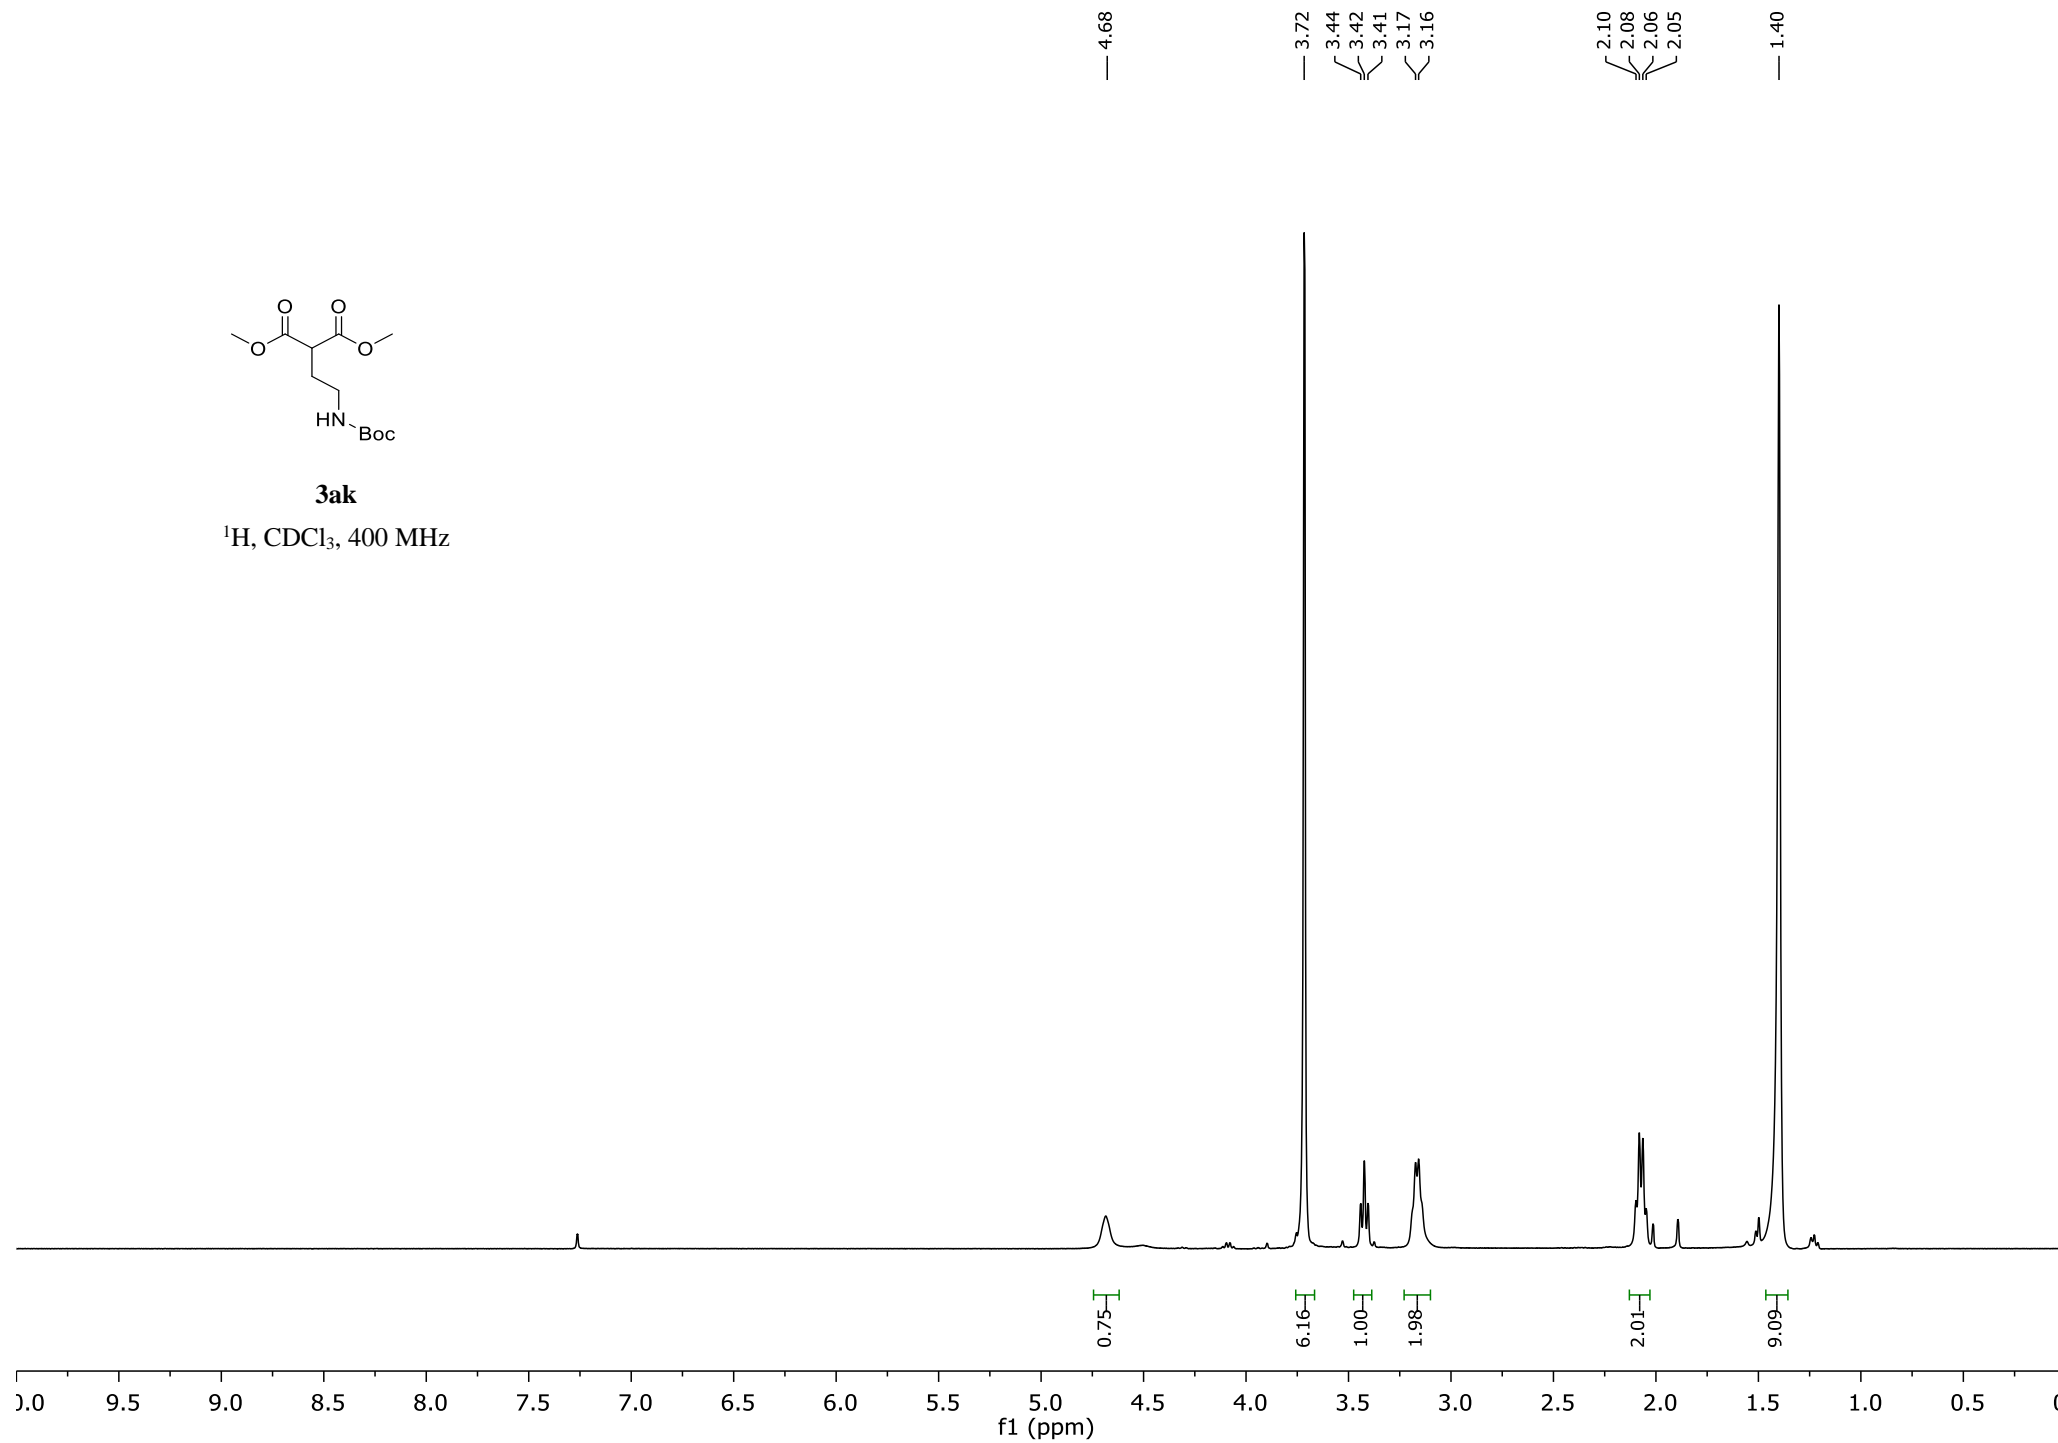

— 169.69 — 155.90

— 79.42

— 52.75 — 49.23

— 38.47

— 29.15 — 28.43

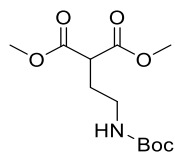

**3ak**

$^{13}\text{C}\{^1\text{H}\}$ ,  $\text{CDCl}_3$ , 100 MHz

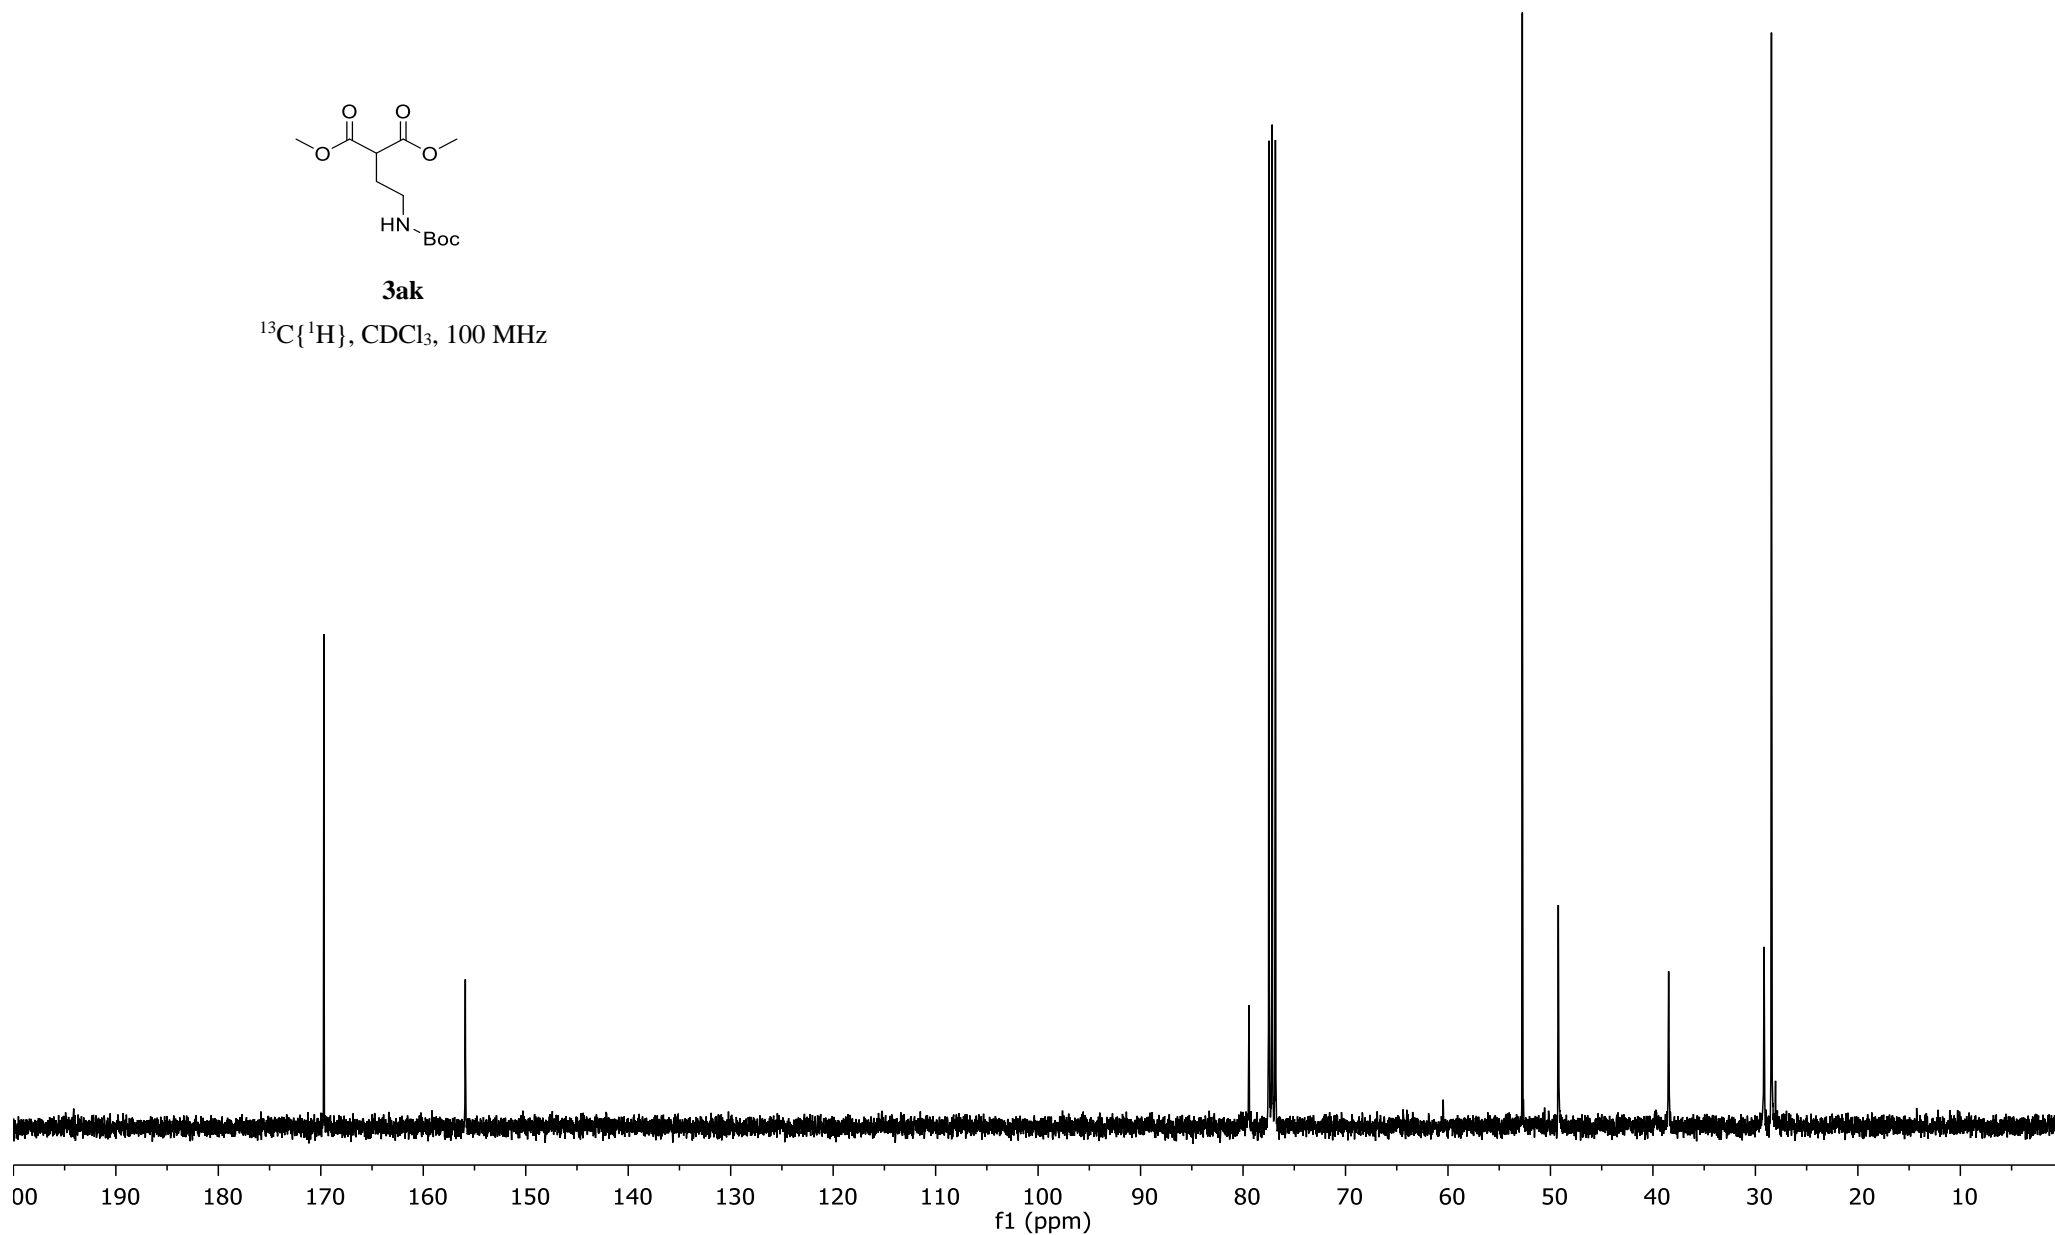

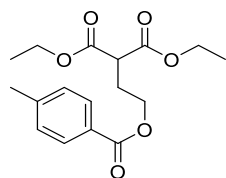

**3bl**

$^1\text{H}$ ,  $\text{CDCl}_3$ , 400 MHz

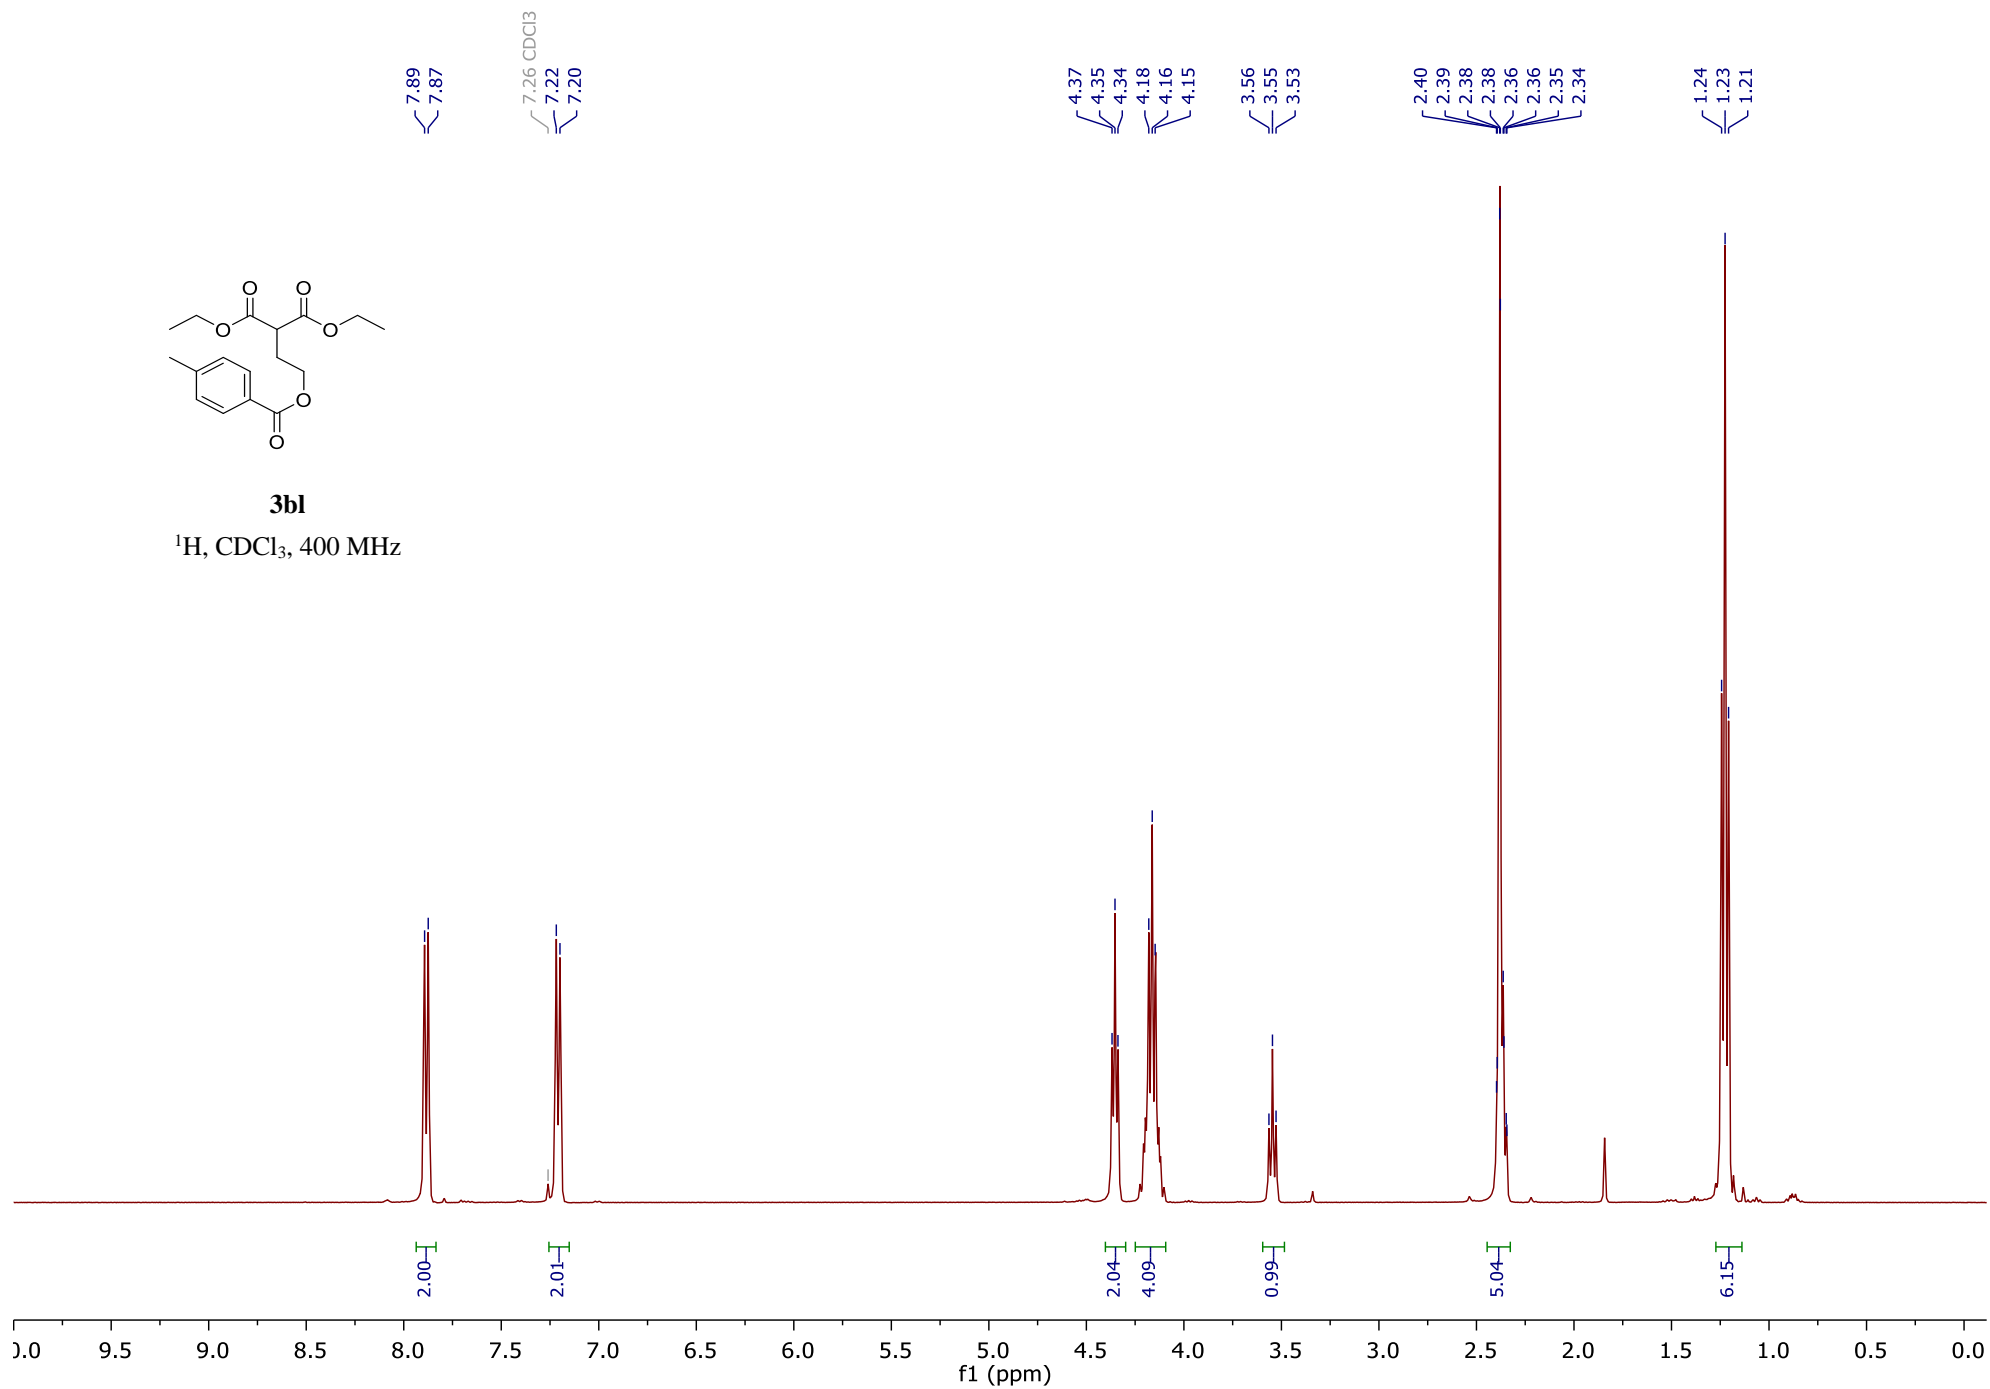



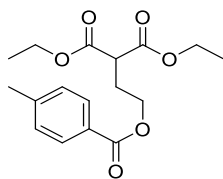

**3bl**

$^{13}\text{C}\{^1\text{H}\}$ ,  $\text{CDCl}_3$ , 100 MHz

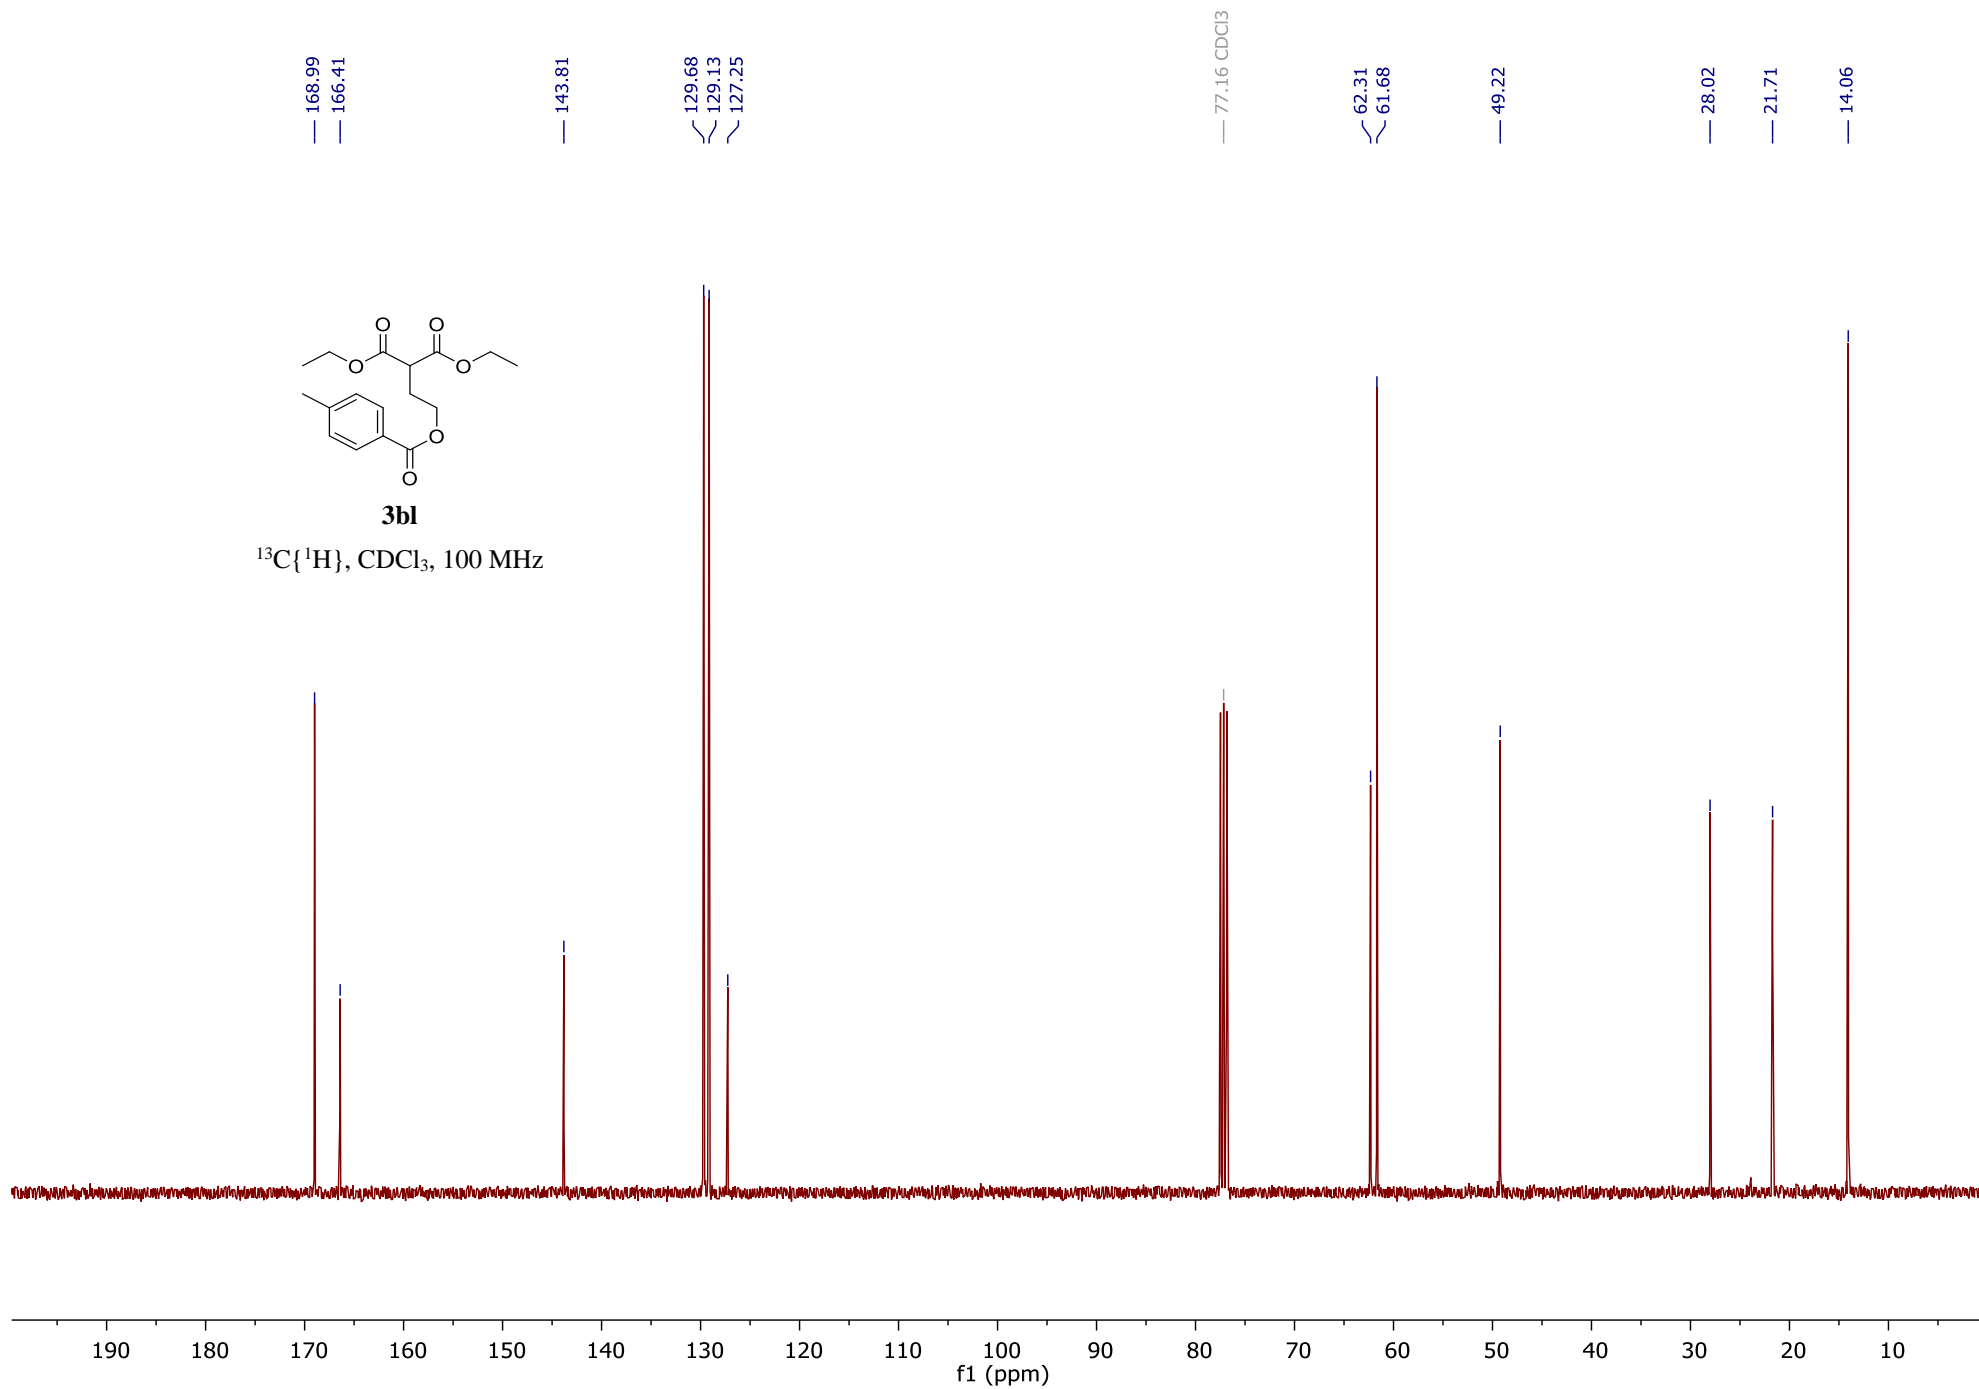

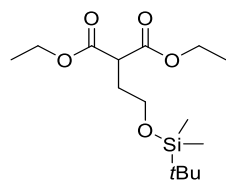

**3bm**

$^1\text{H}$ ,  $\text{CDCl}_3$ , 400 MHz

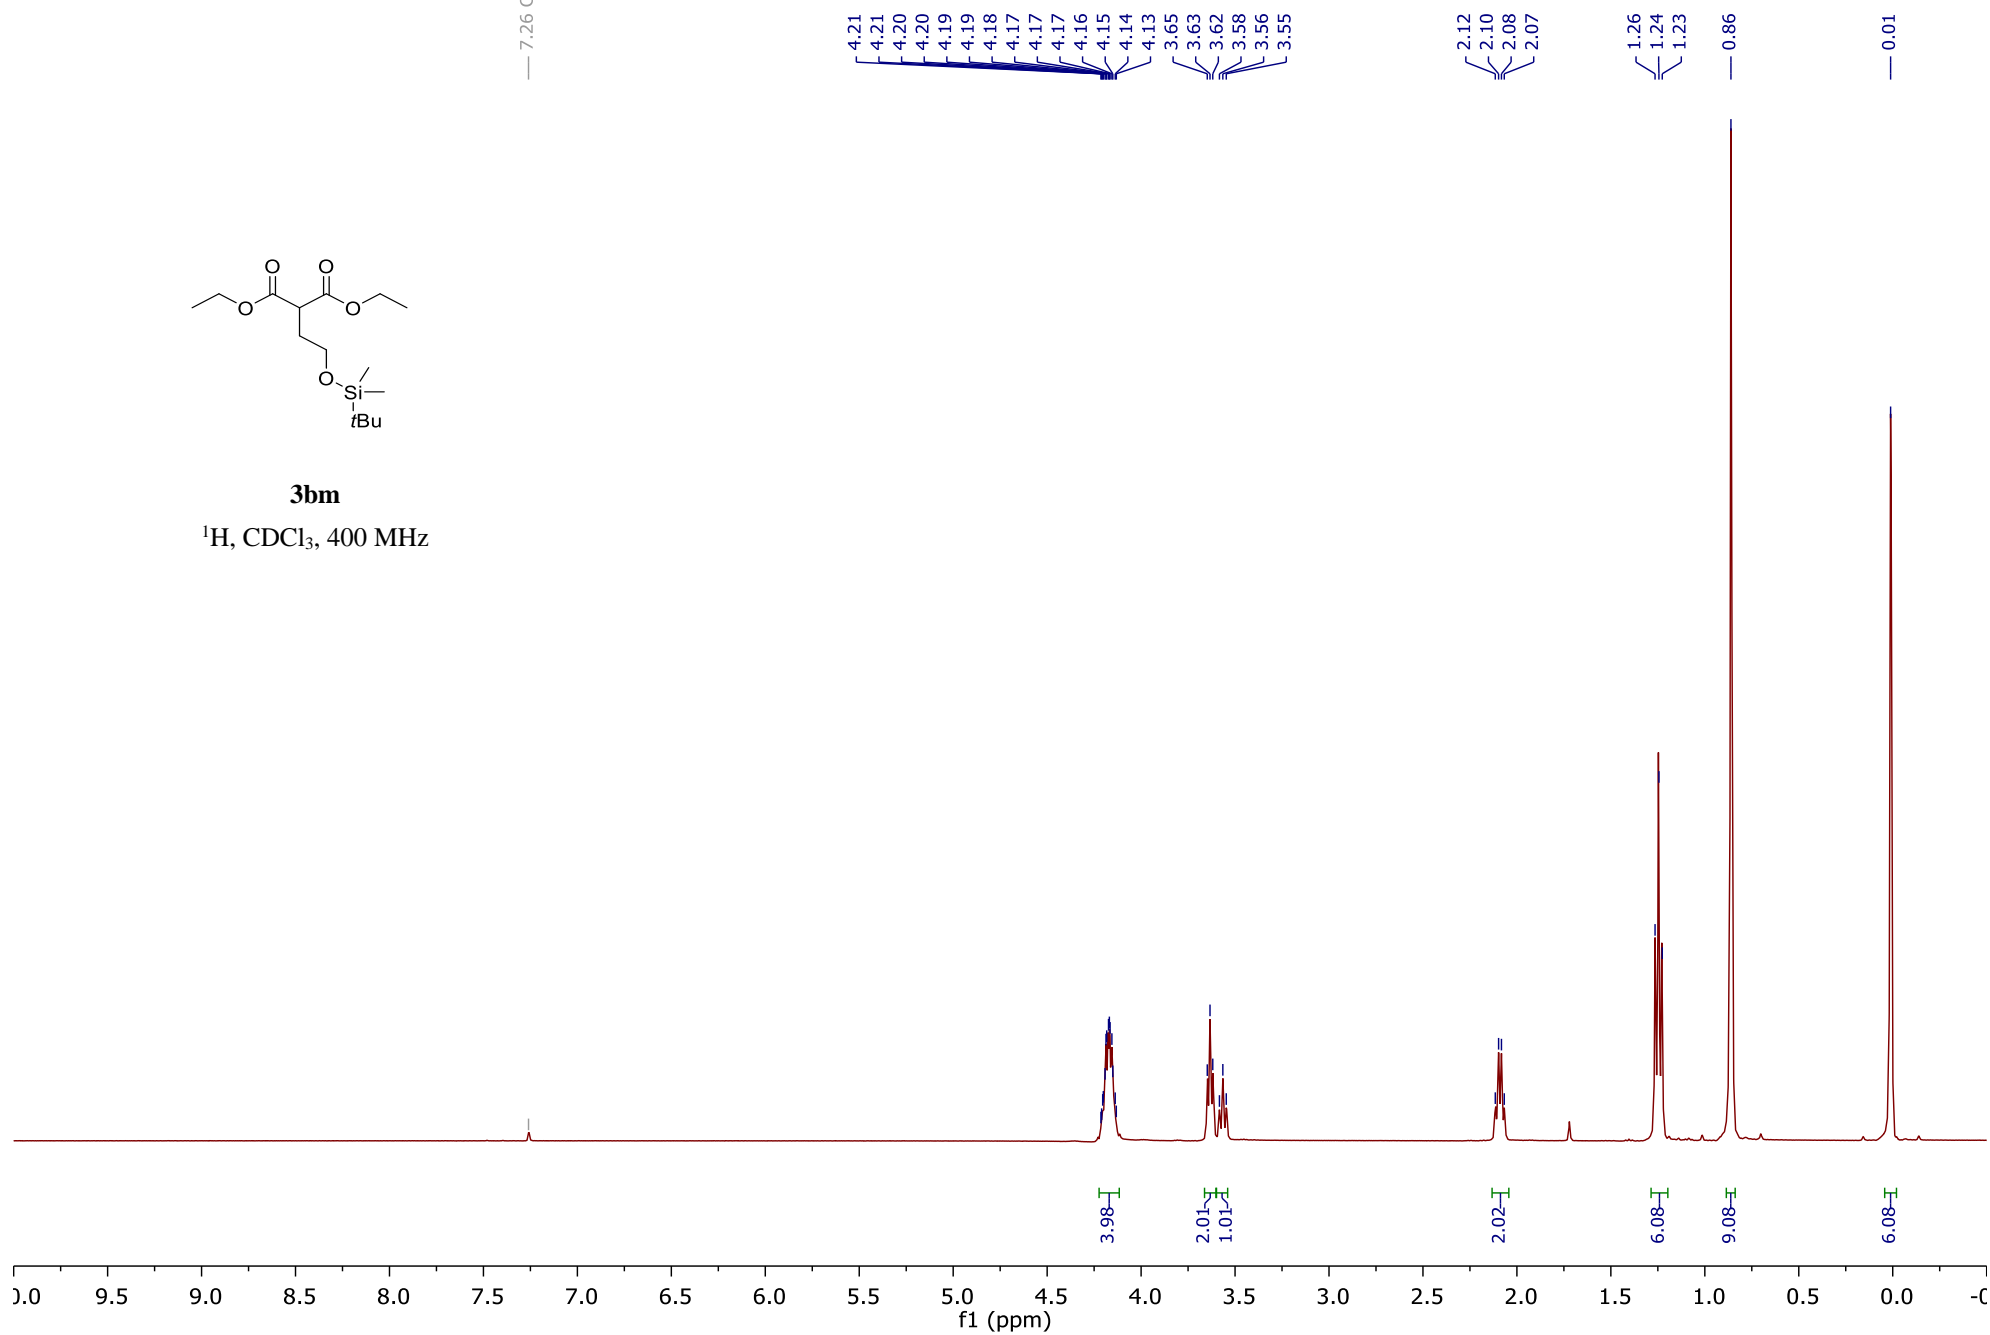

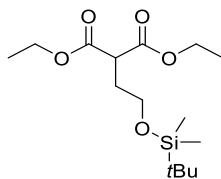

**3bm**

$^{13}\text{C}\{^1\text{H}\}$ ,  $\text{CDCl}_3$ , 100 MHz

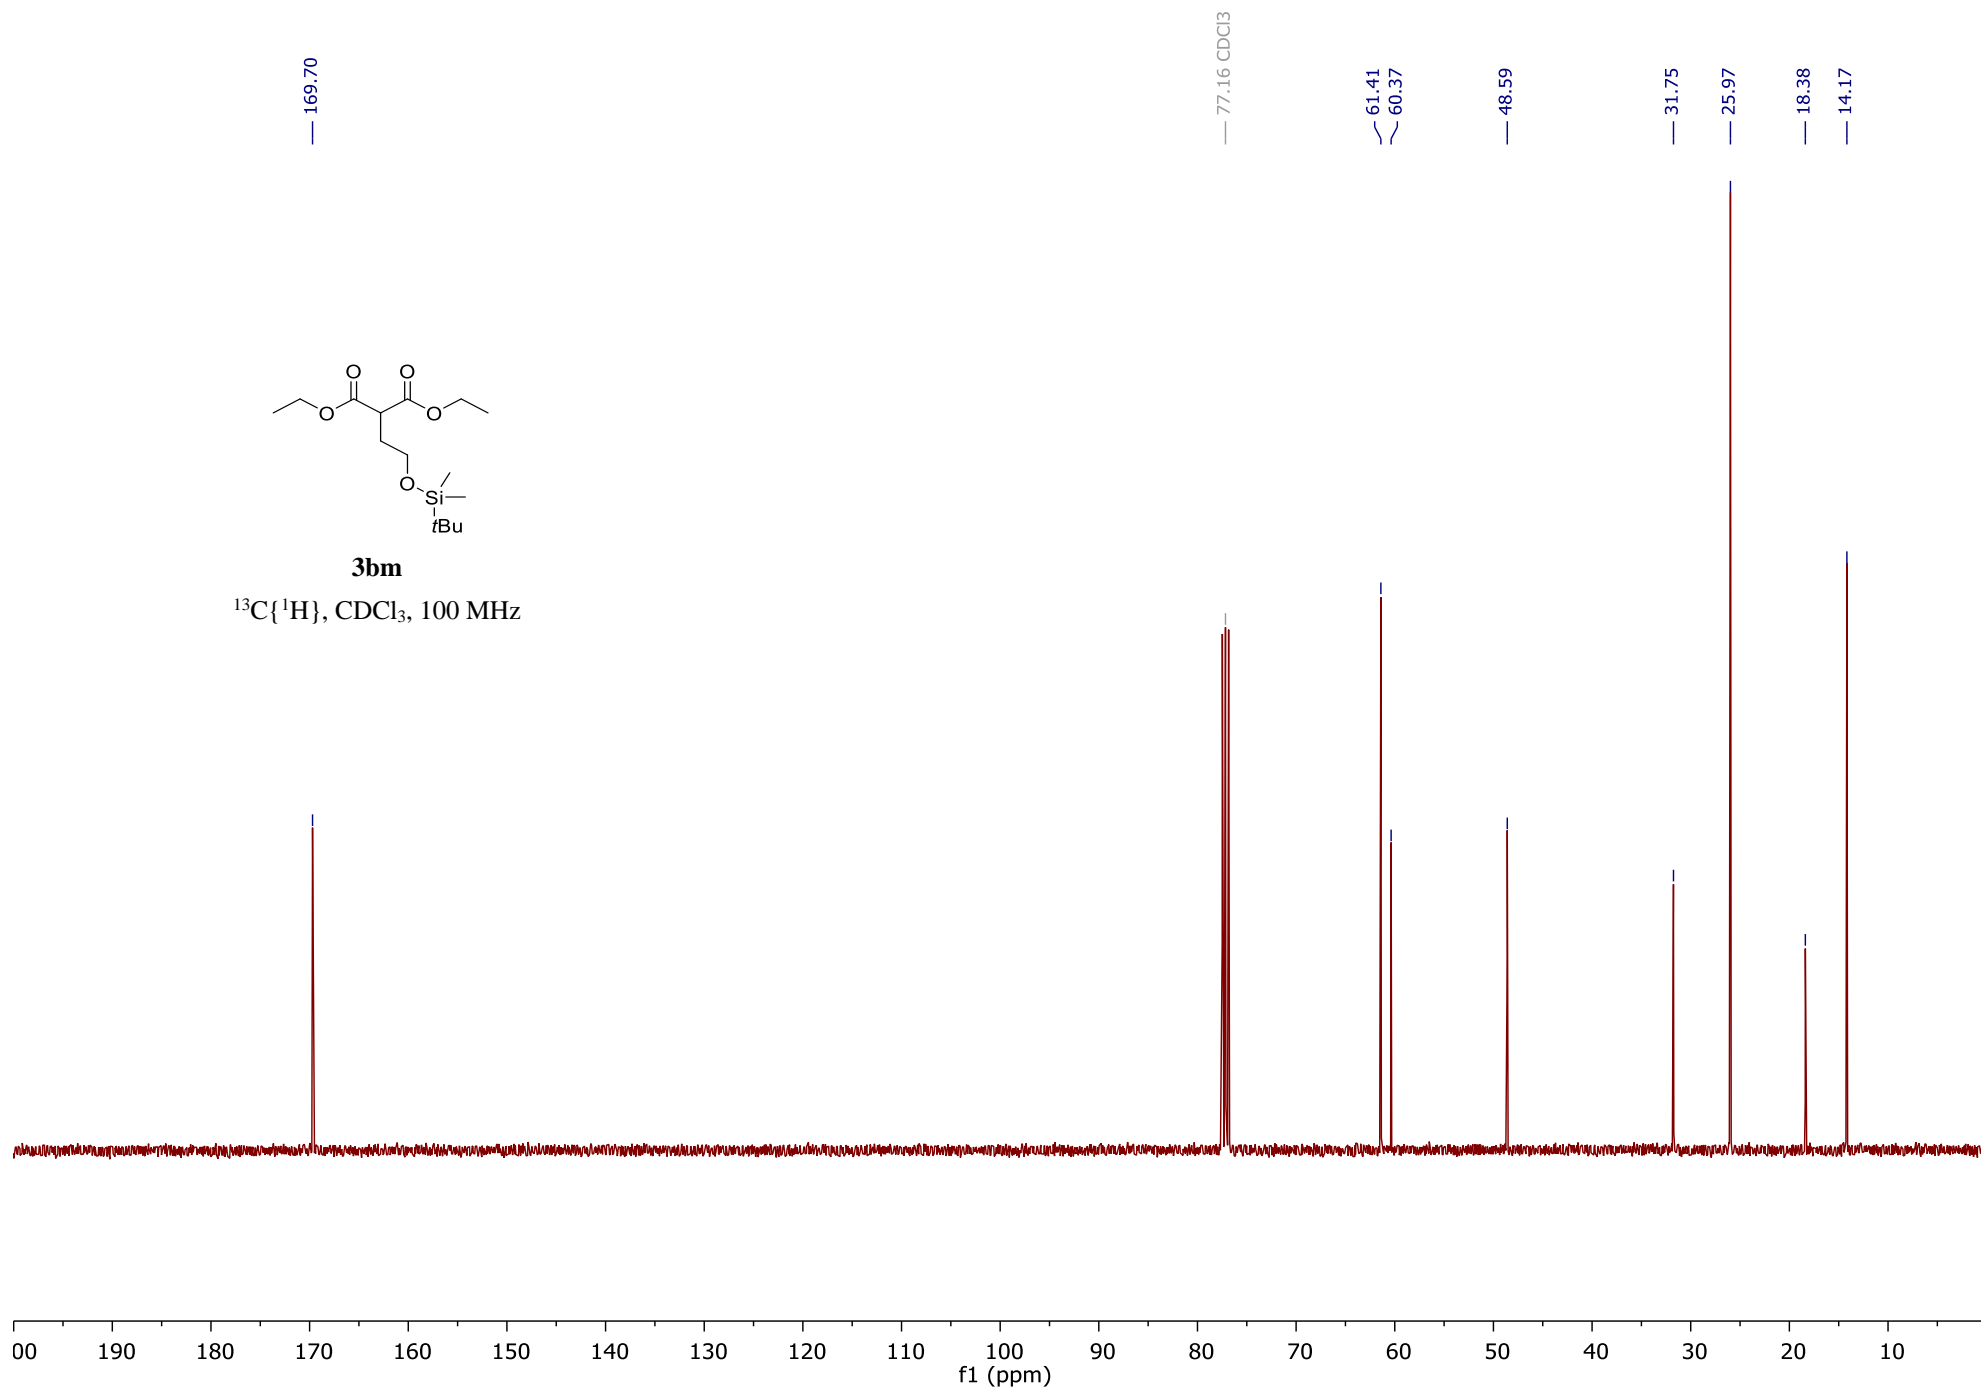

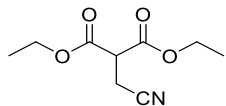

**3bn**

<sup>1</sup>H, CDCl<sub>3</sub>, 400 MHz

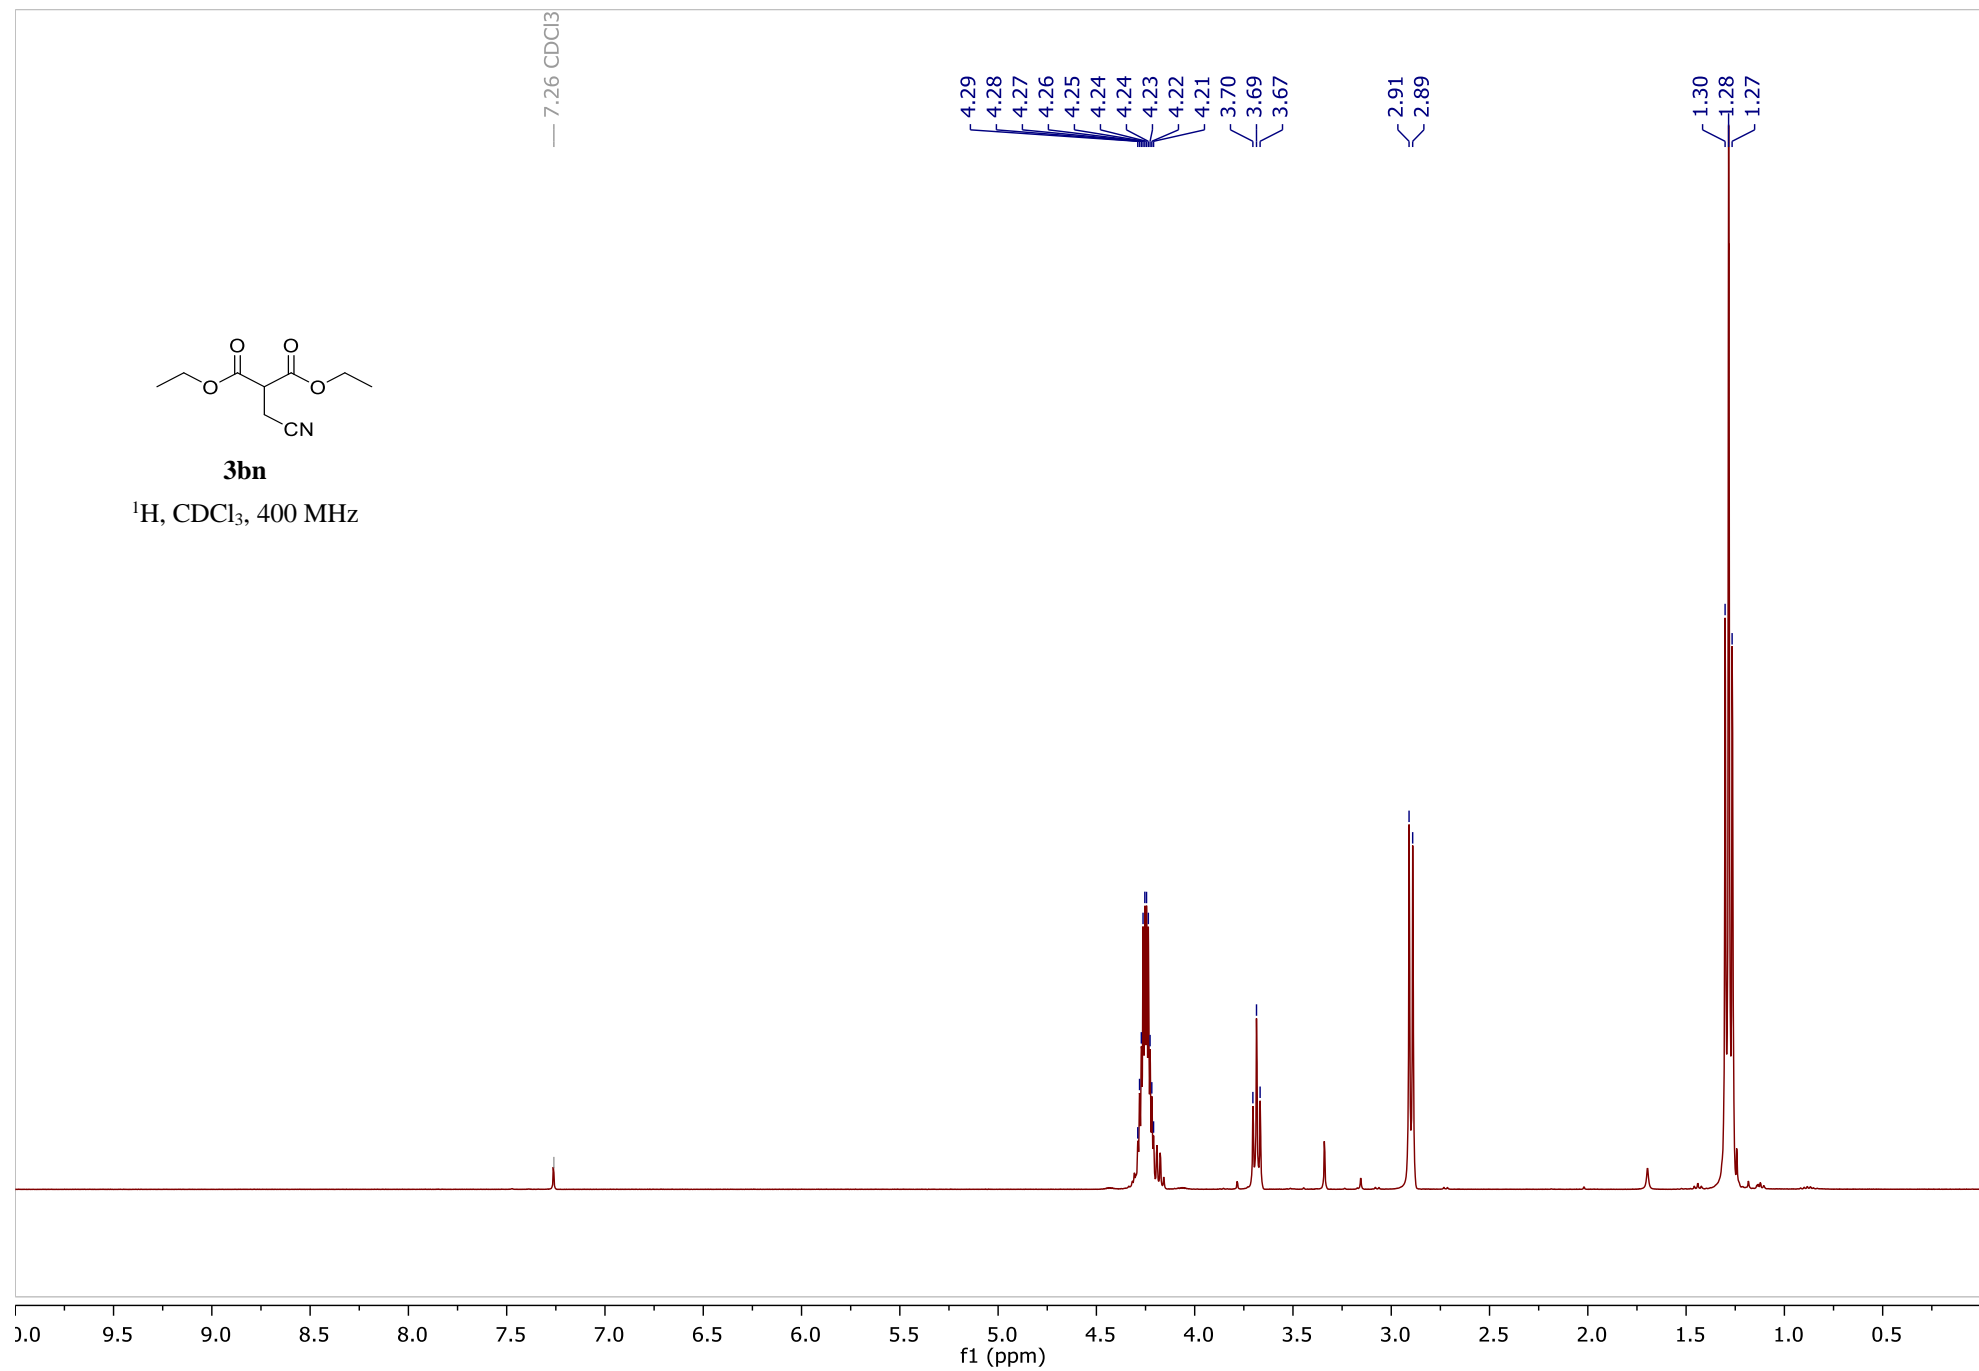

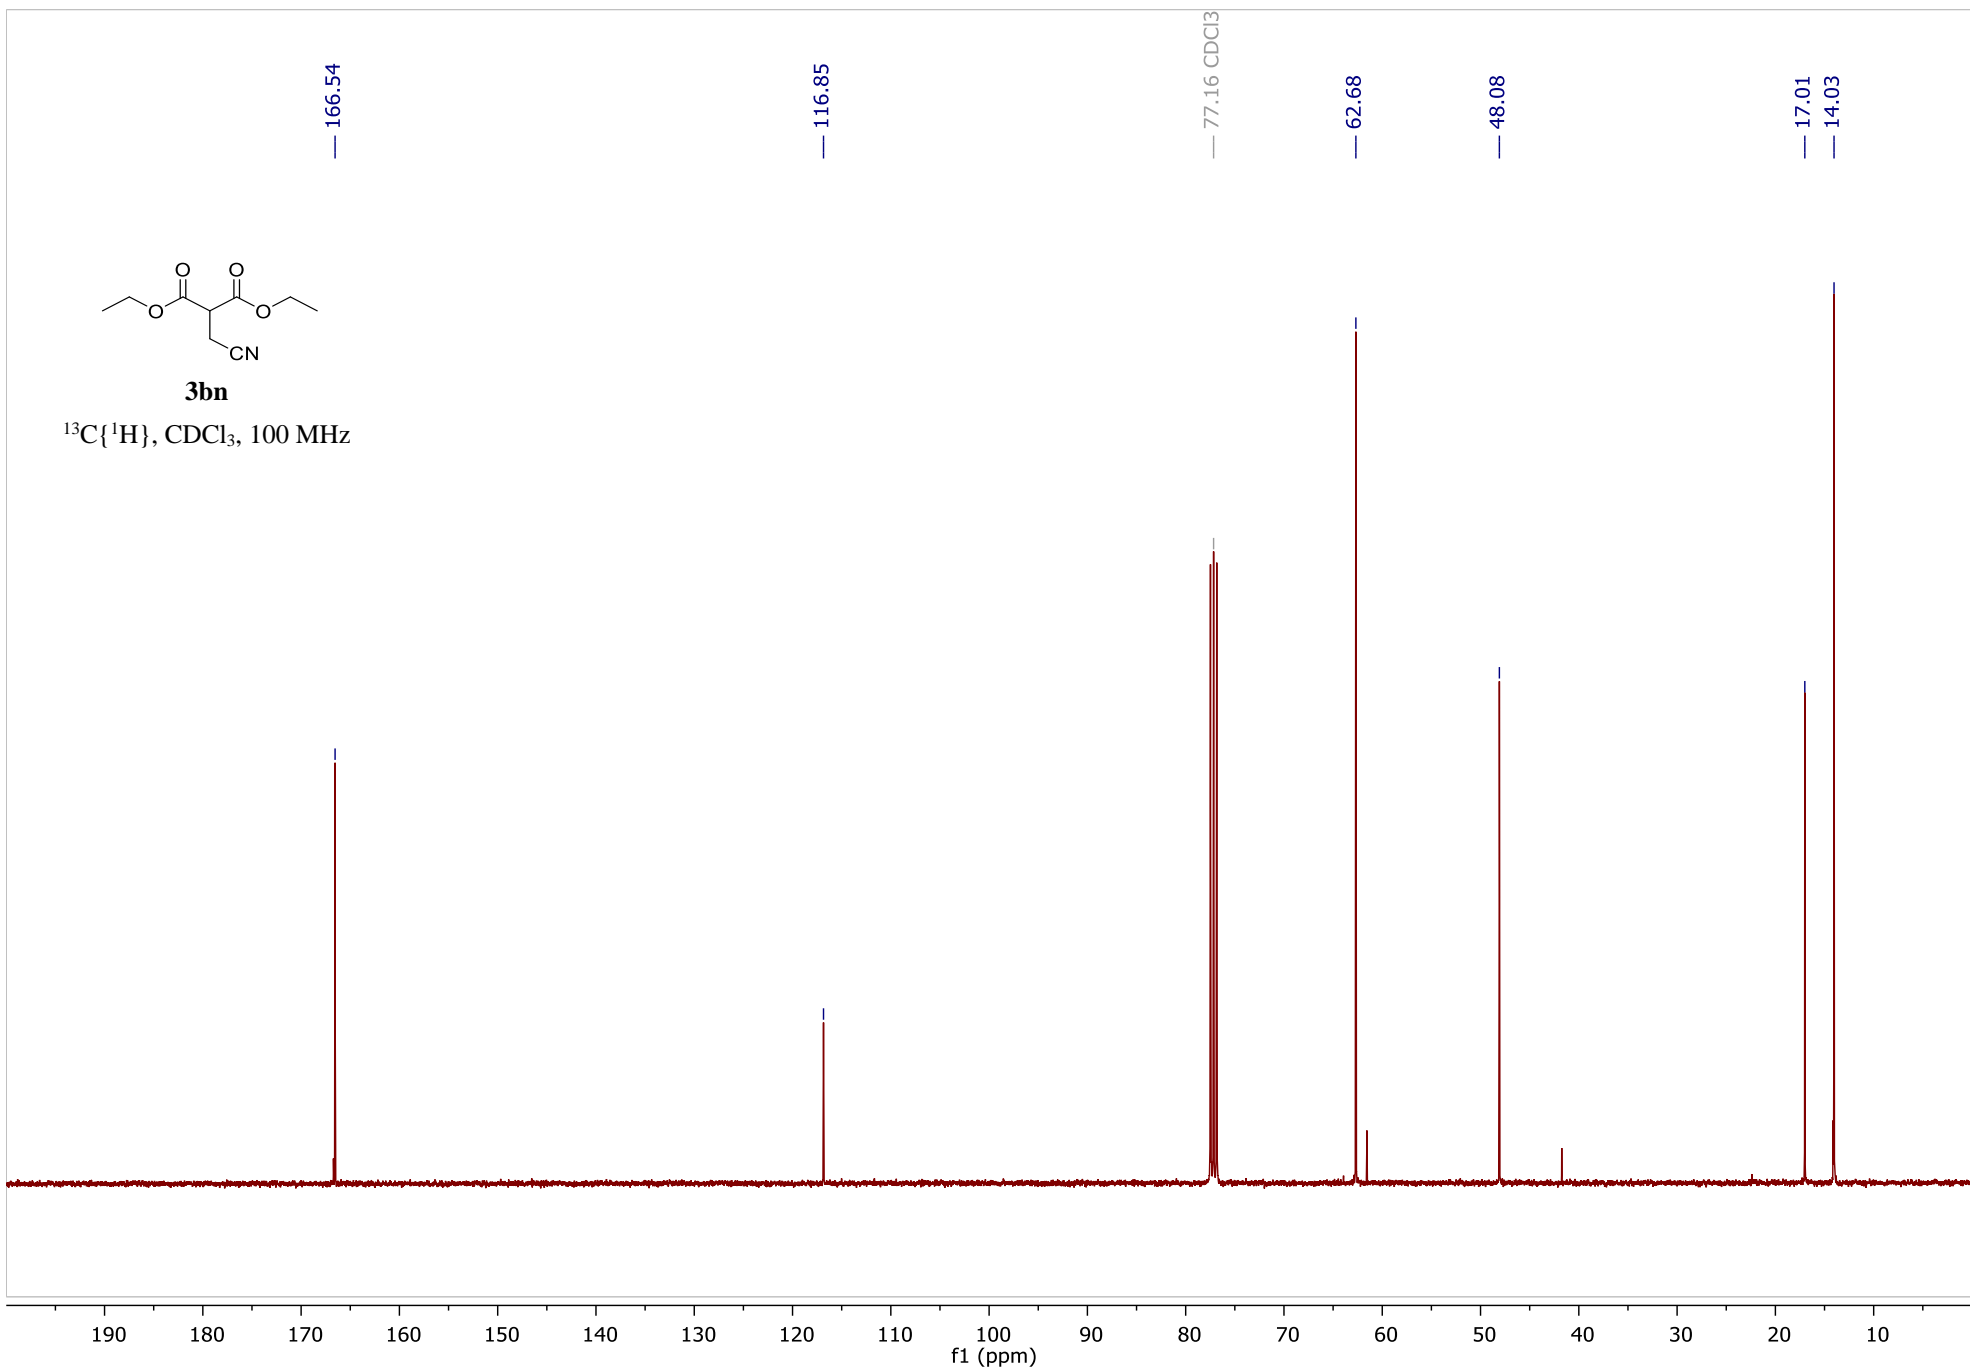

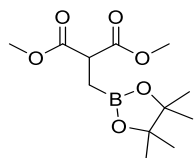

**3ao**

$^1\text{H}$ ,  $\text{CDCl}_3$ , 400 MHz

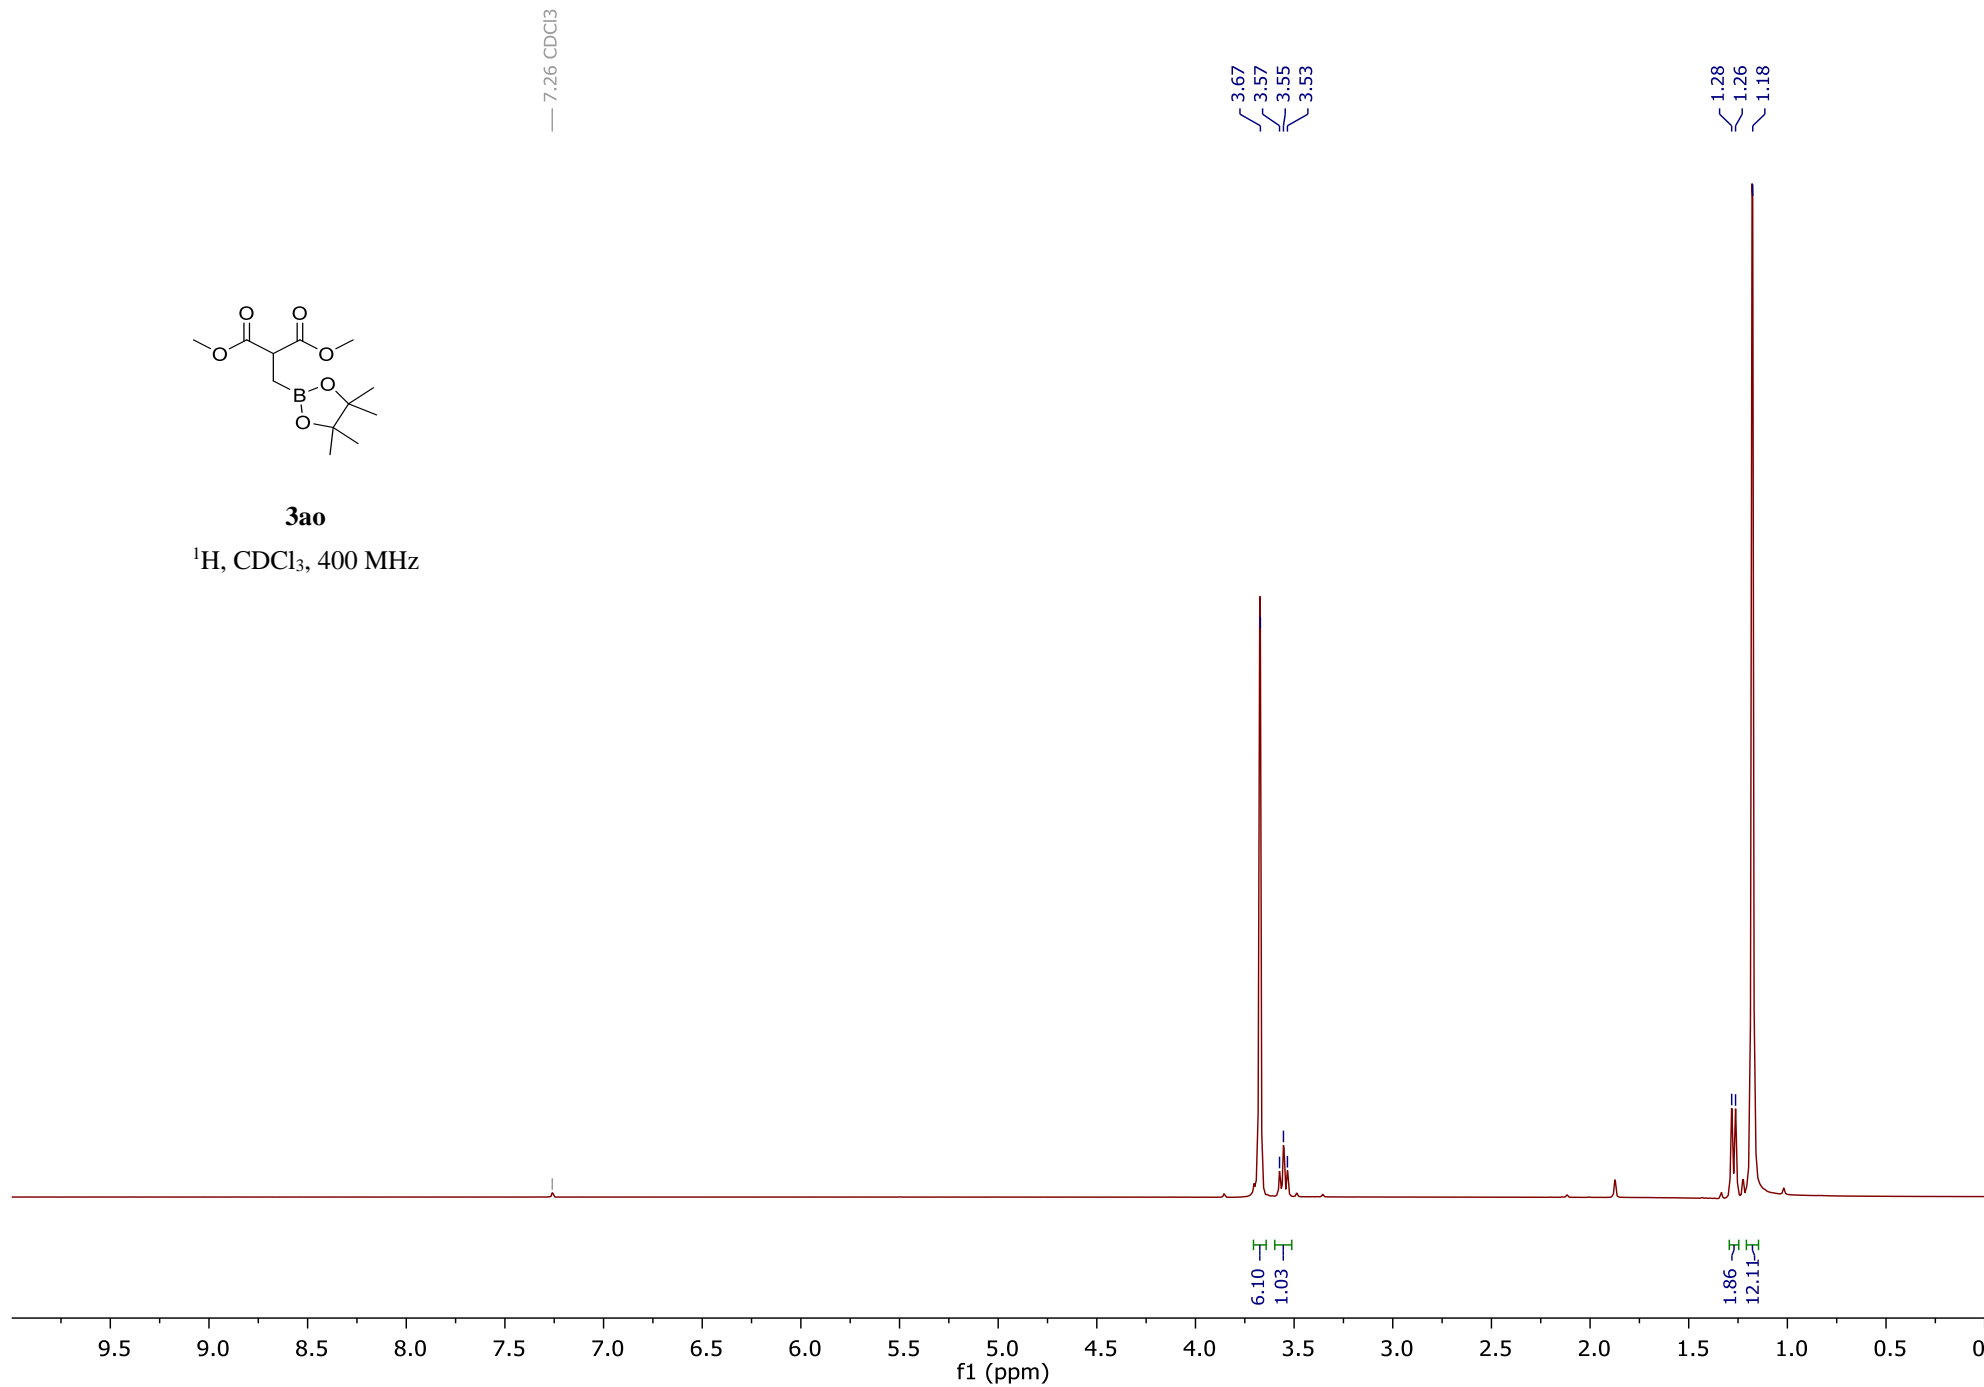

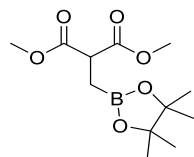

**3ao**

$^{13}\text{C}\{^1\text{H}\}$ ,  $\text{CDCl}_3$ , 100 MHz

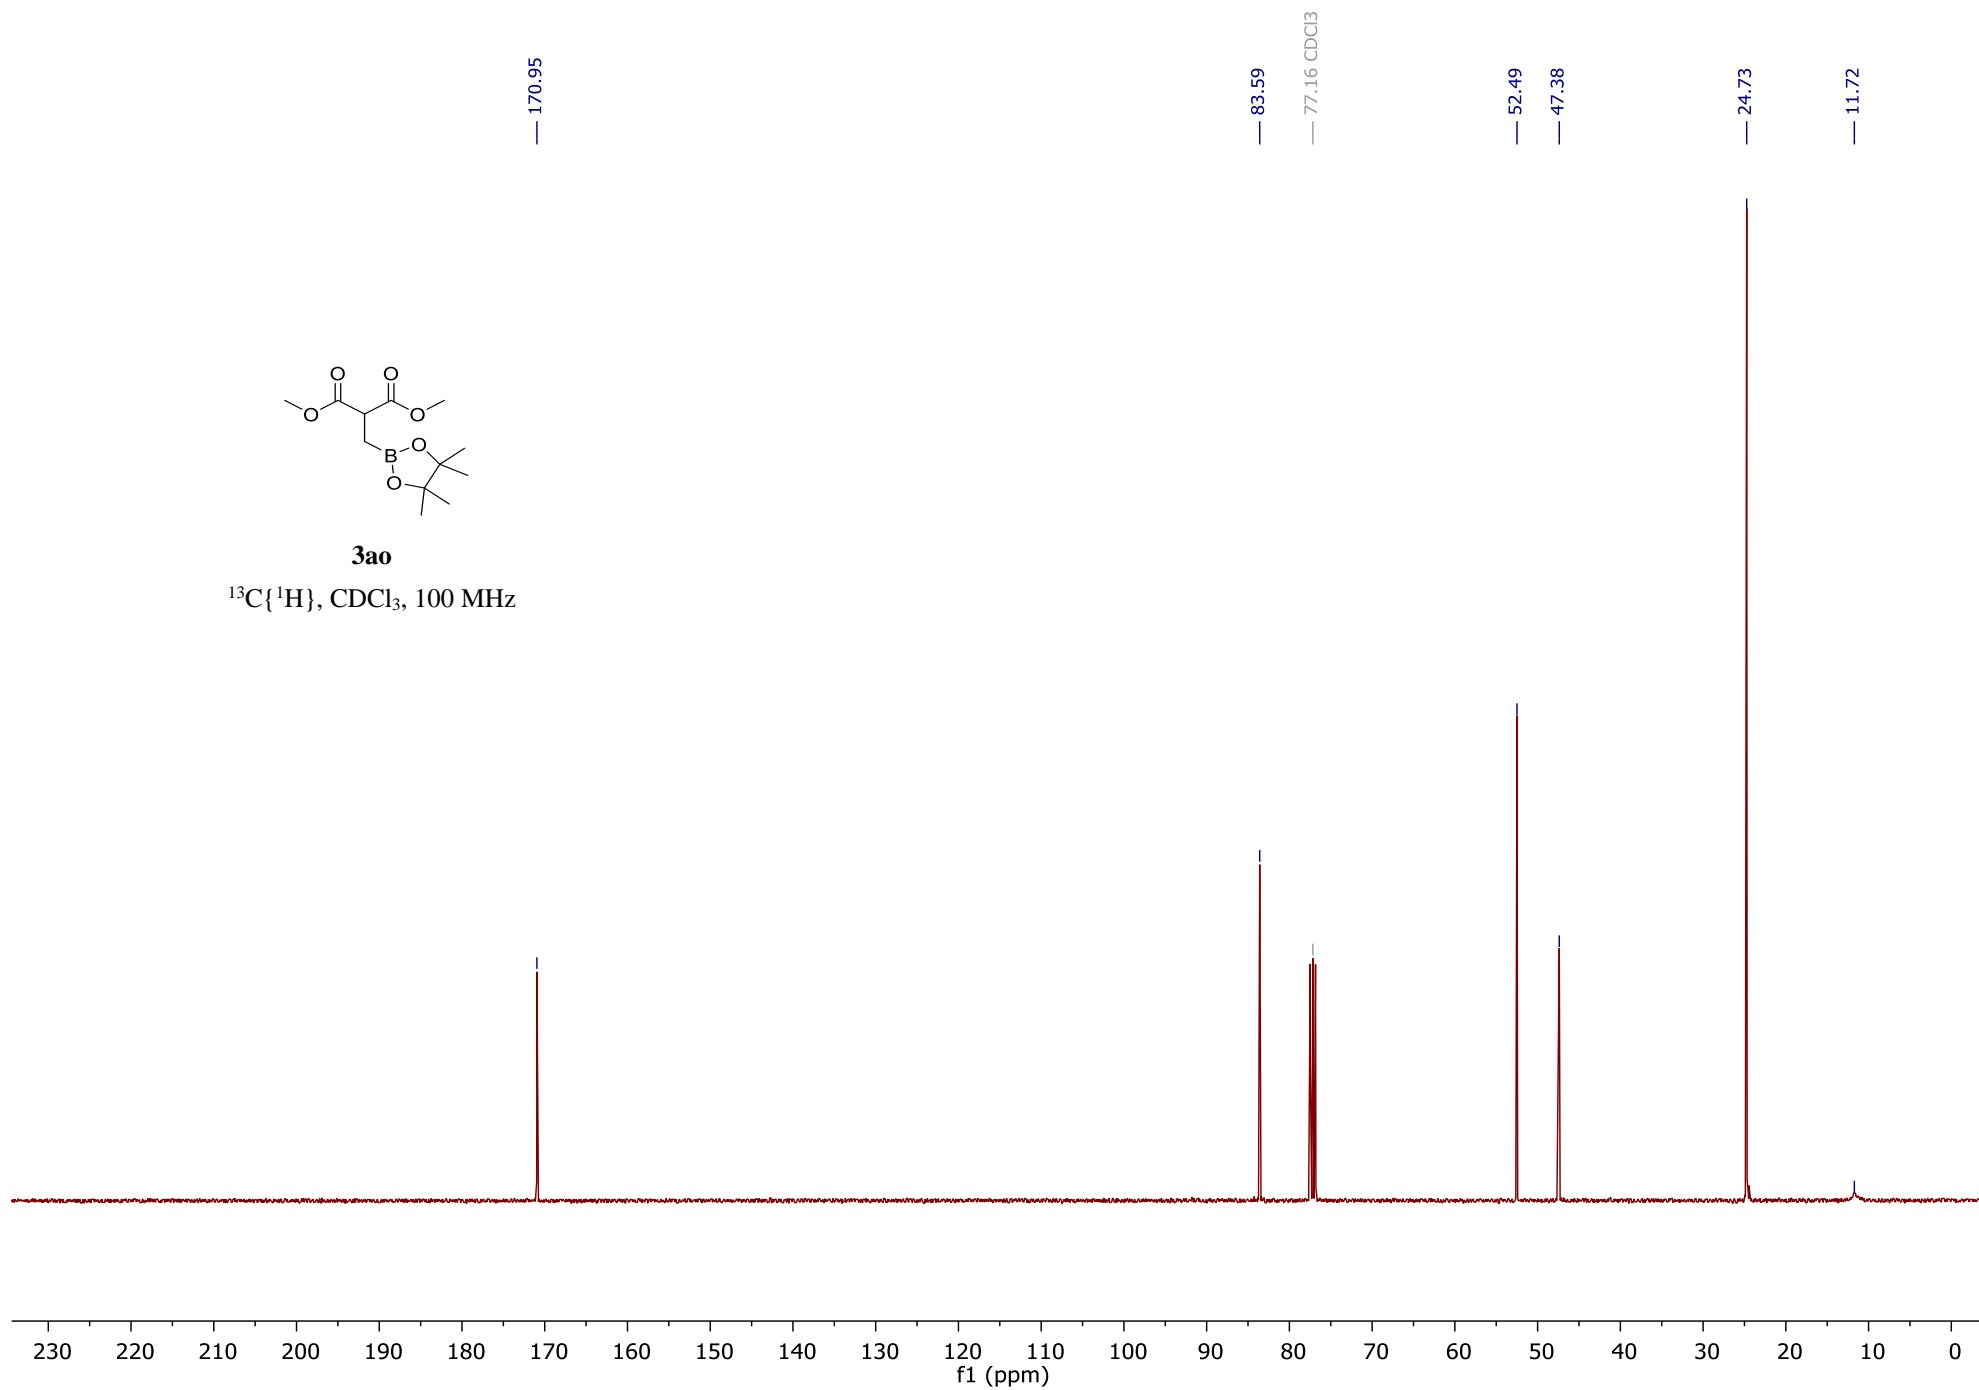

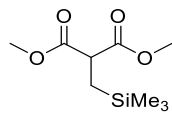

**3ap**

<sup>1</sup>H, CDCl<sub>3</sub>, 400 MHz

— 7.26 CDCl<sub>3</sub>

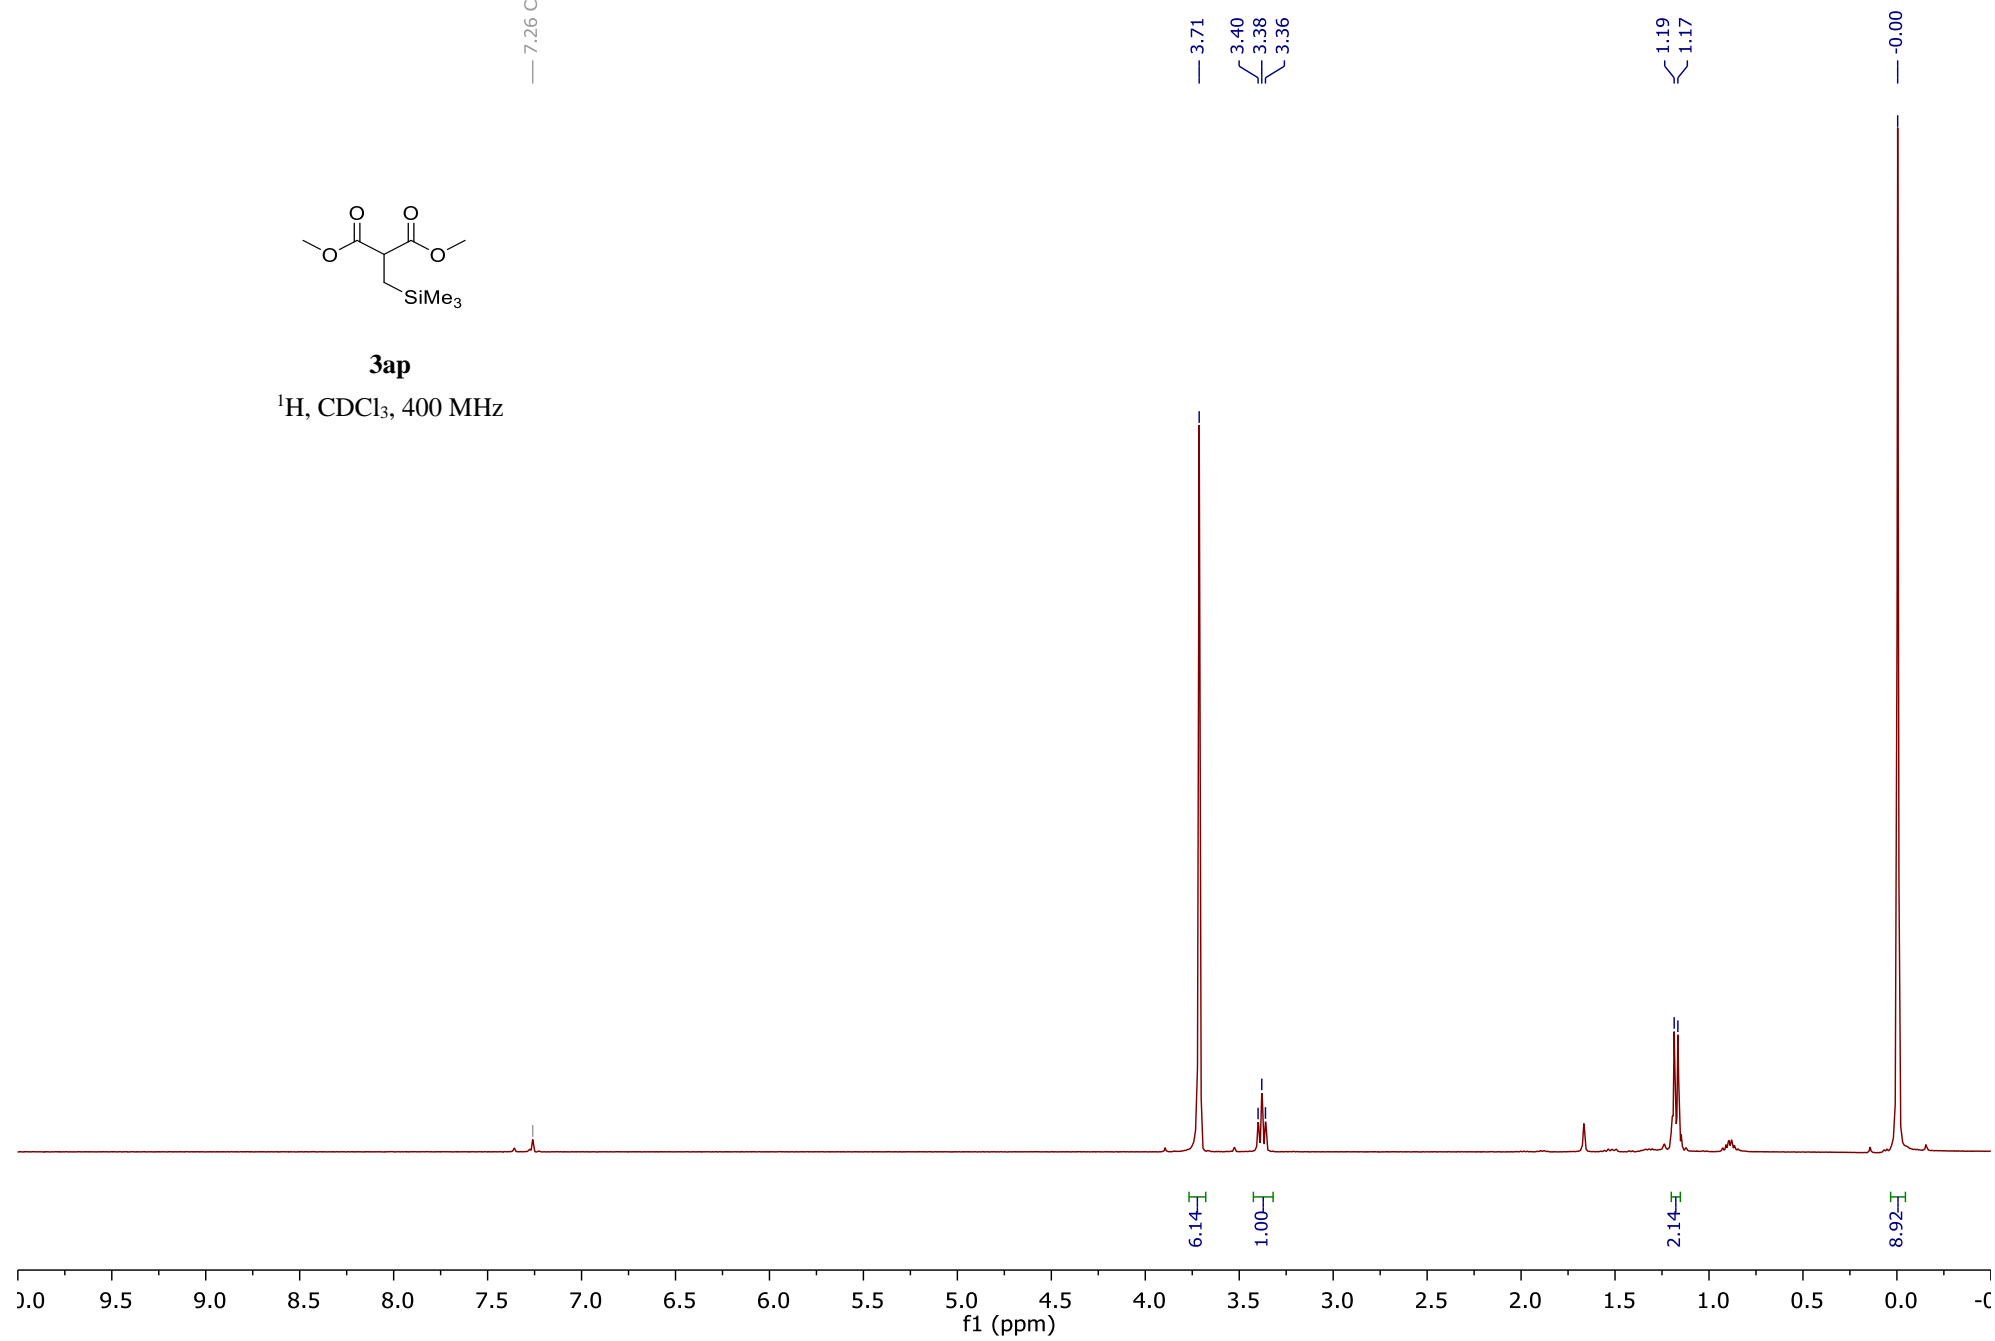



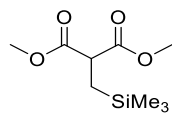

**3ap**

$^{13}\text{C}\{^1\text{H}\}$ ,  $\text{CDCl}_3$ , 100 MHz

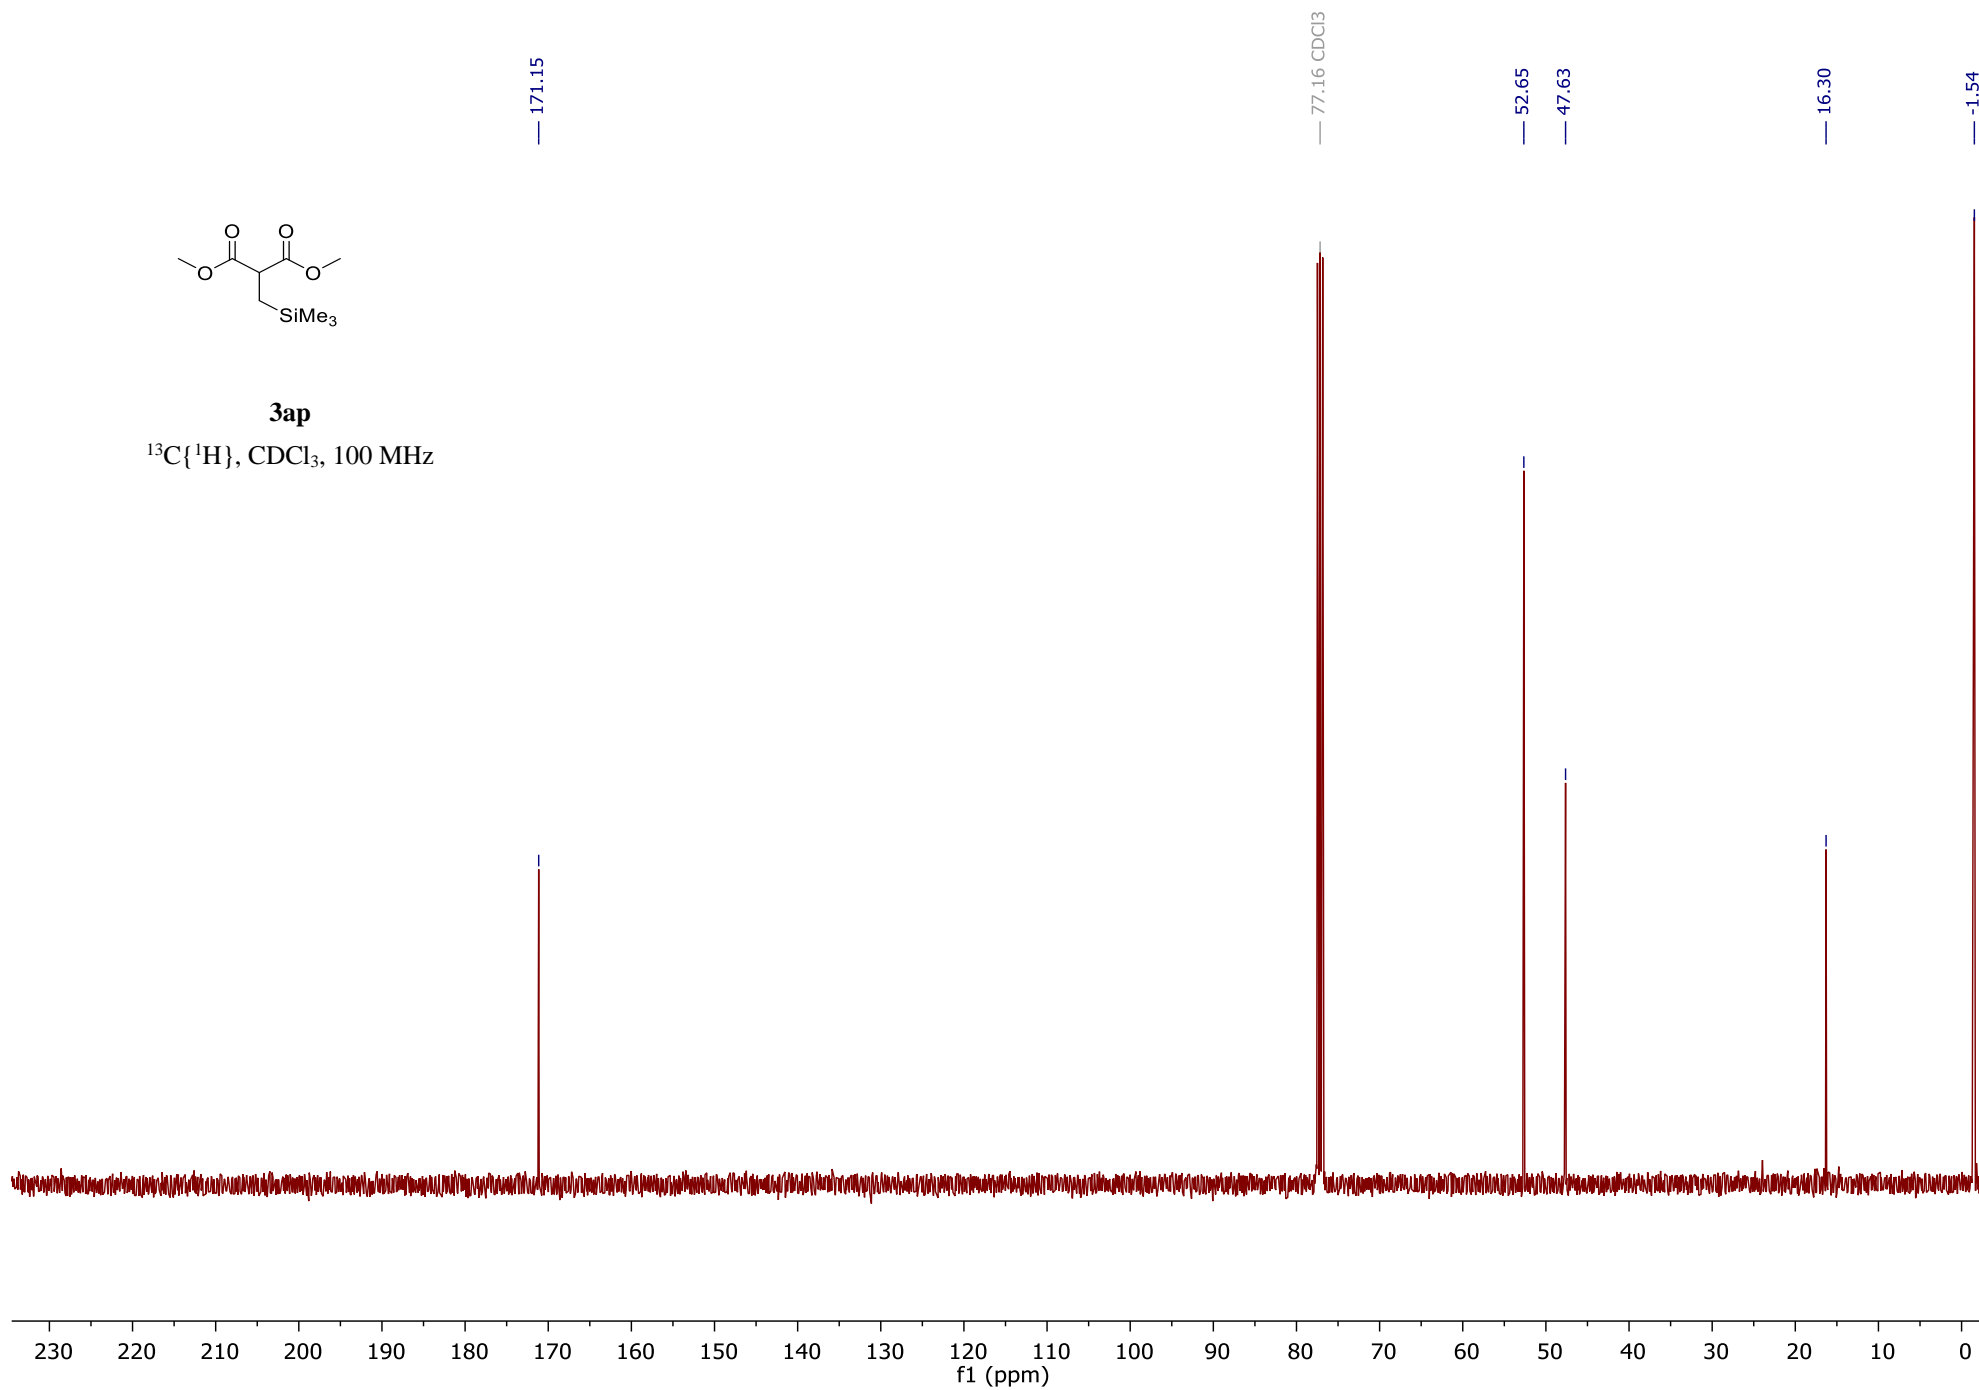

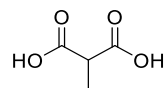

**9a**

$^1\text{H}$ ,  $\text{CD}_3\text{COCD}_3$ , 400 MHz

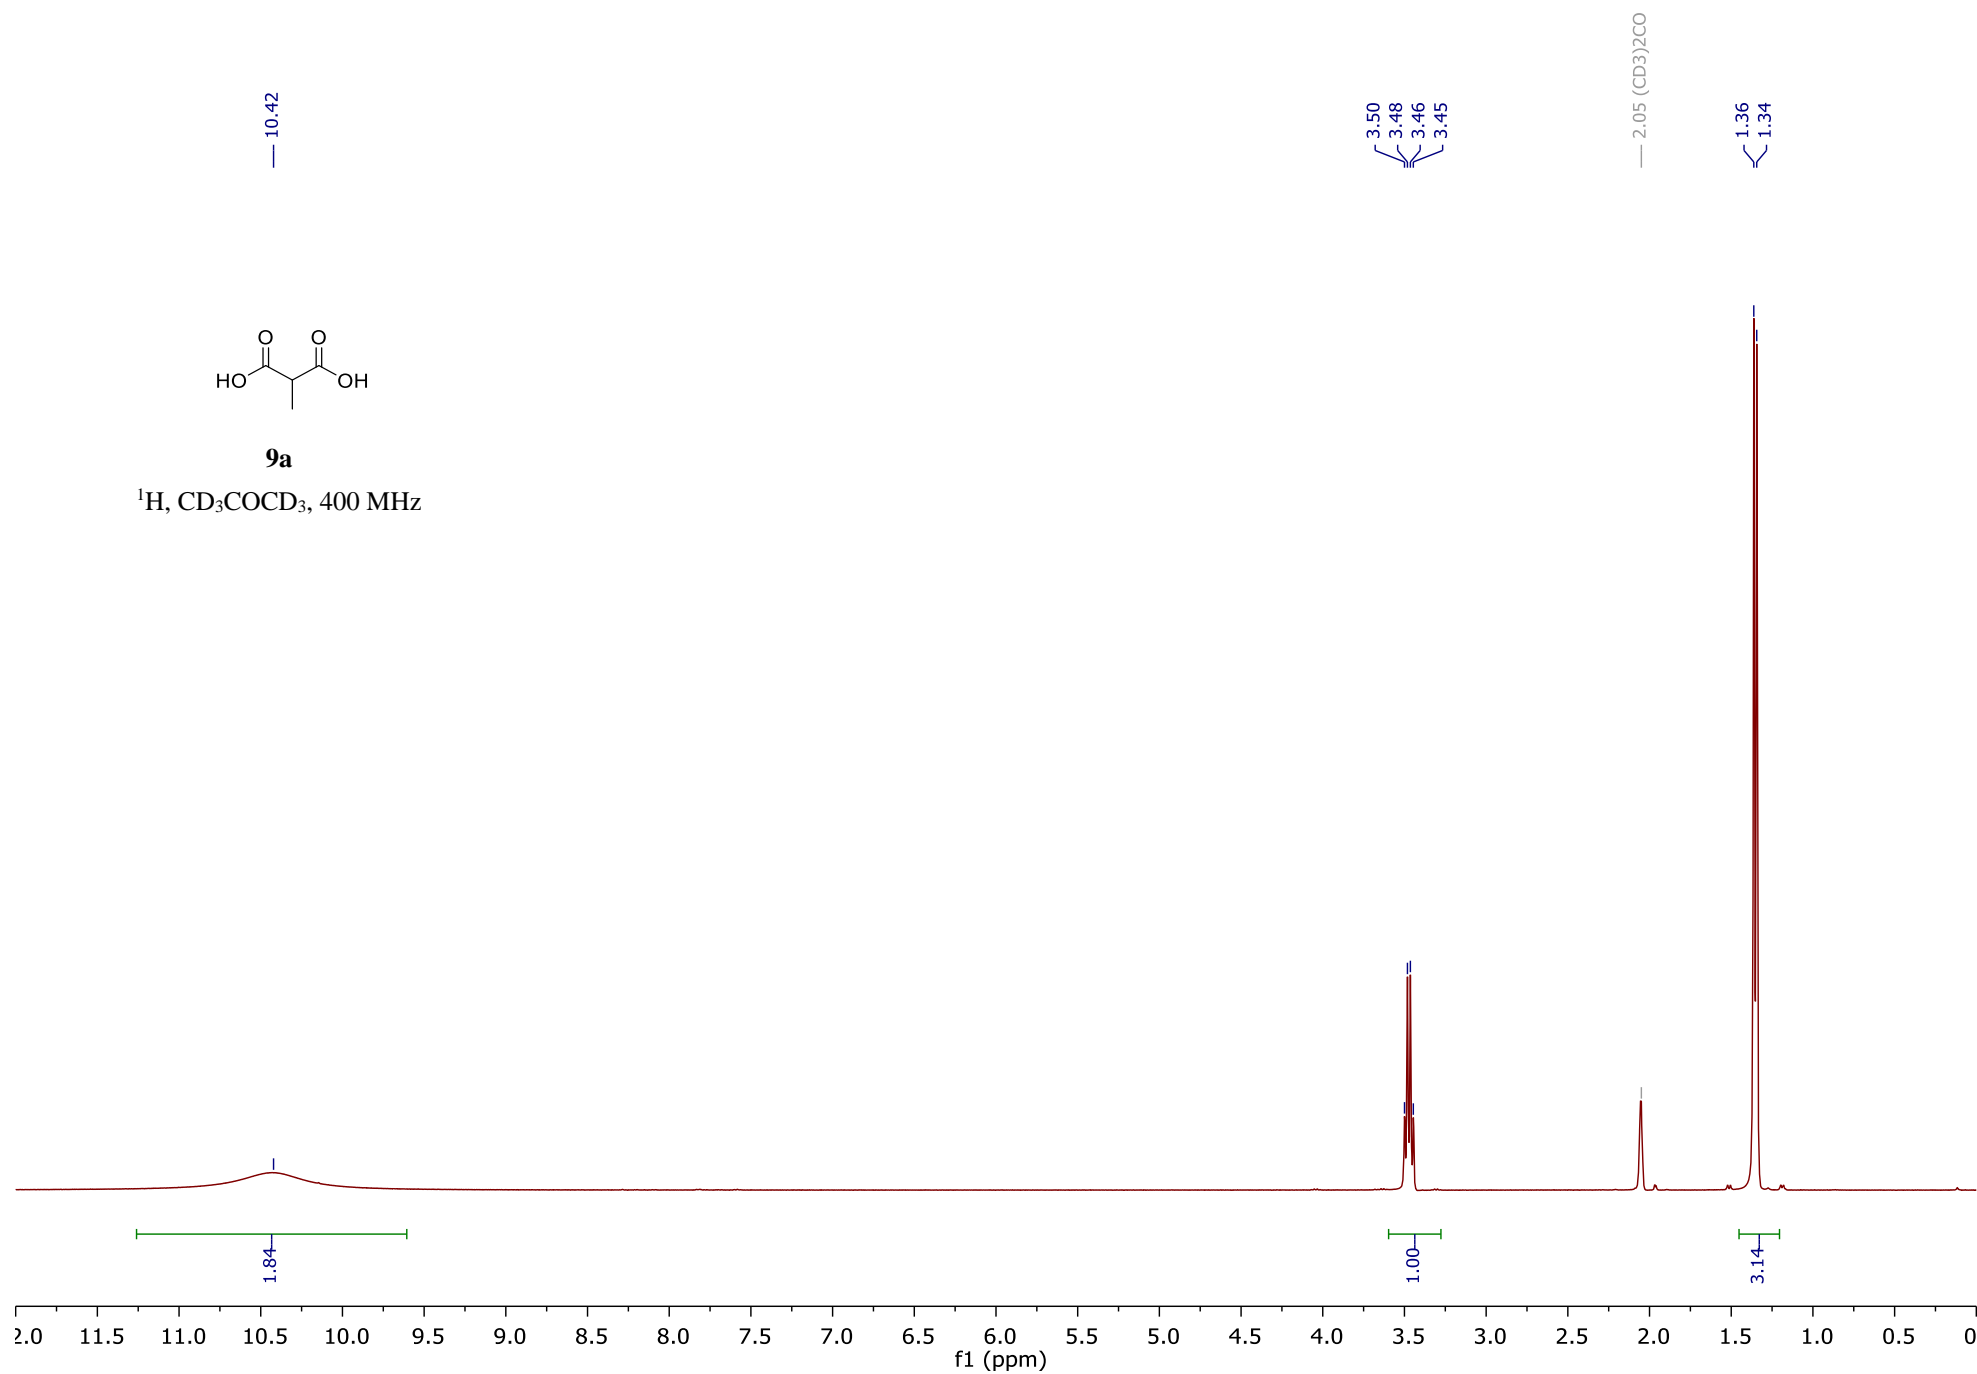

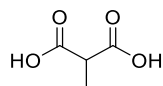

**9a**

$^{13}\text{C}\{^1\text{H}\}$ ,  $\text{CD}_3\text{COCD}_3$ , 100 MHz

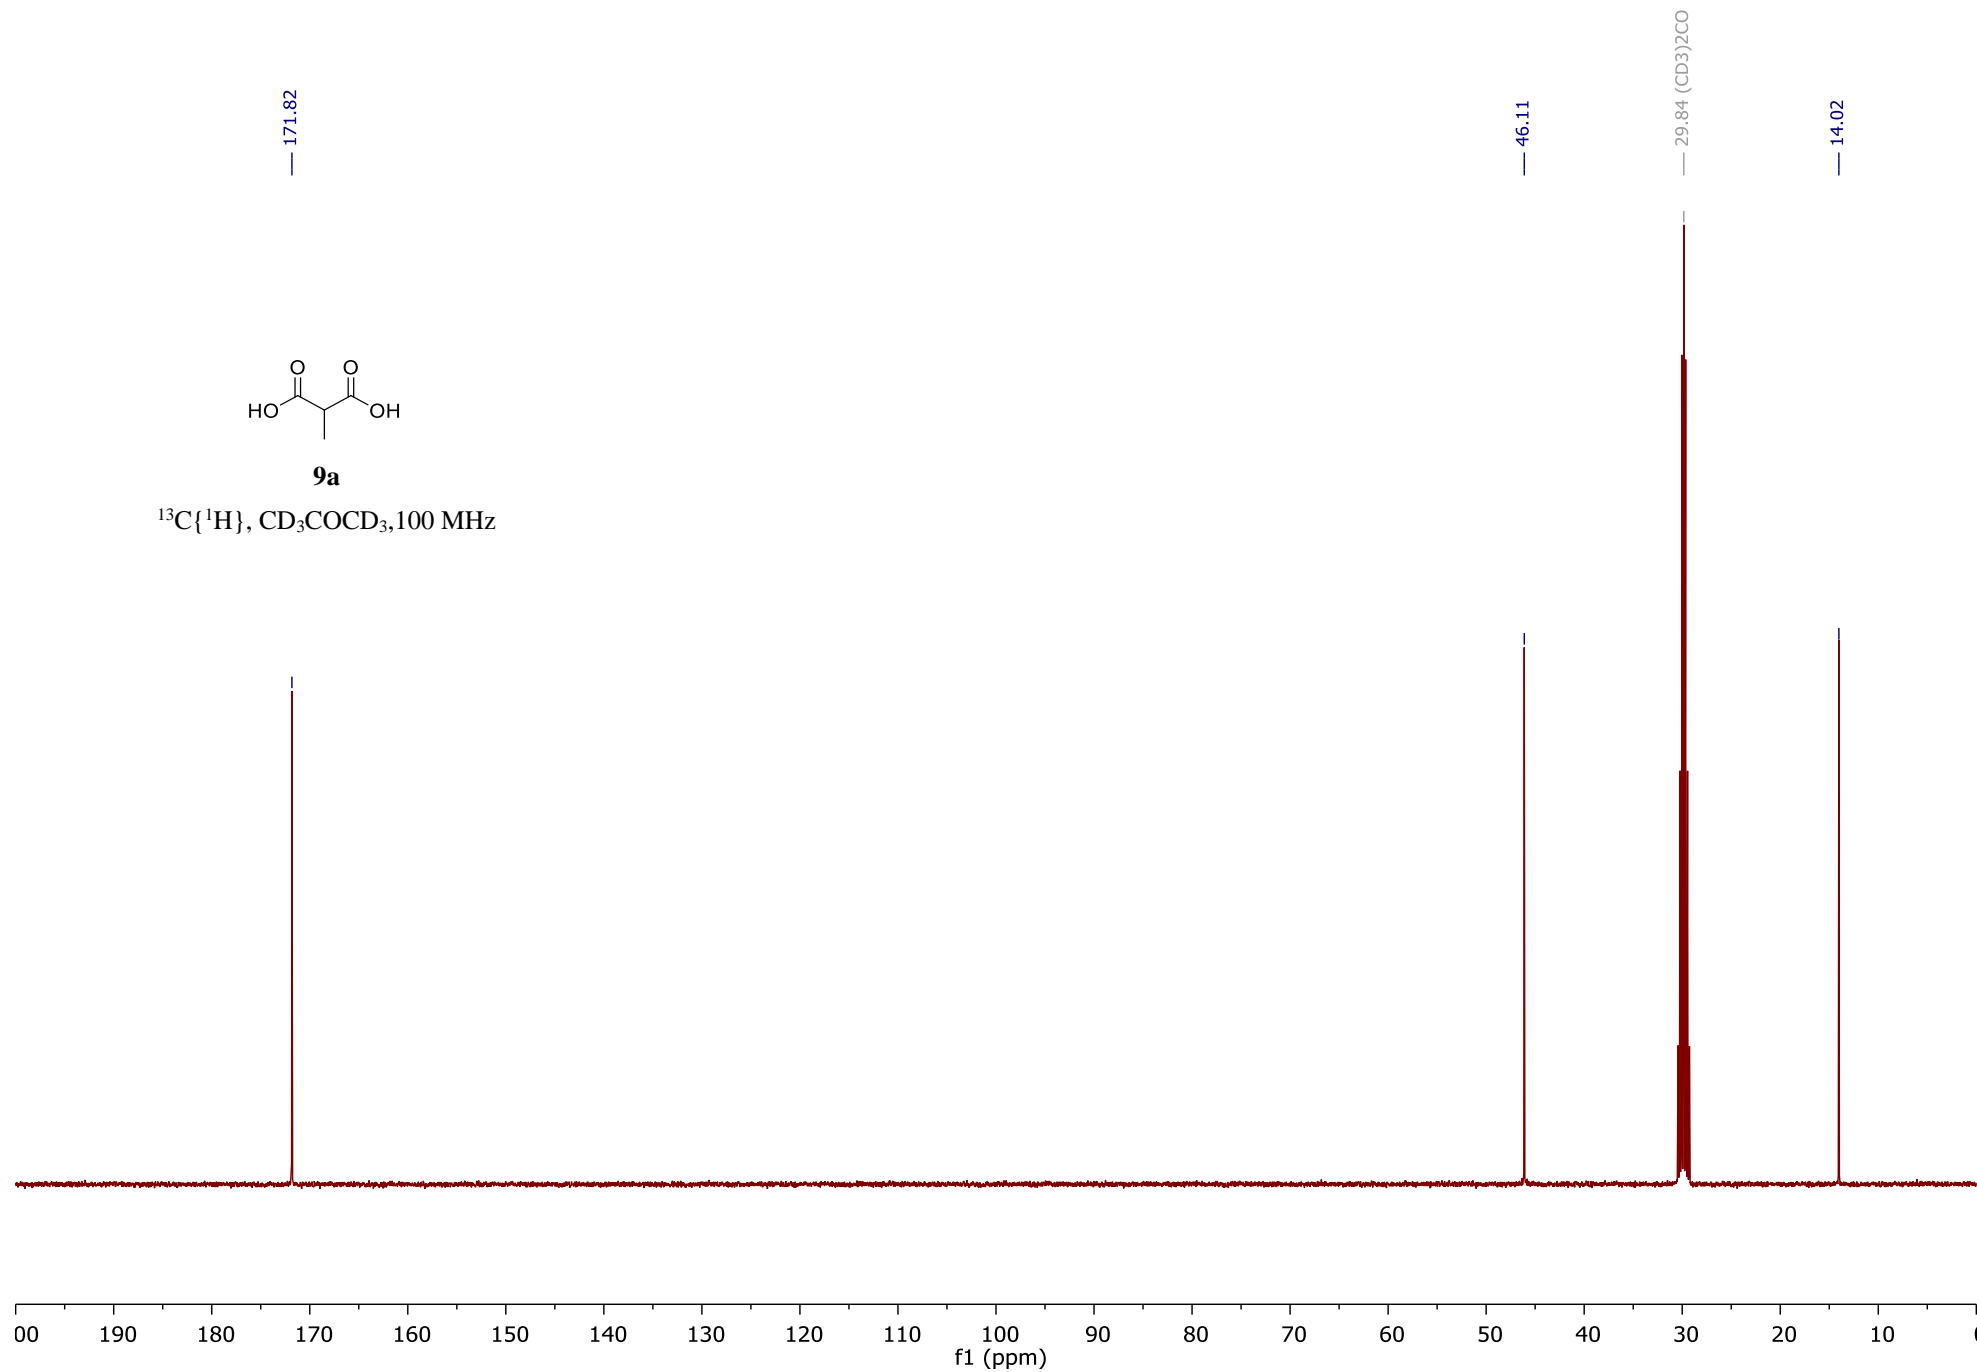

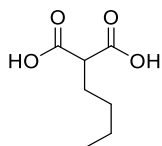

**9c**

$^1\text{H}$ ,  $\text{CD}_3\text{SOCD}_3$ , 400 MHz

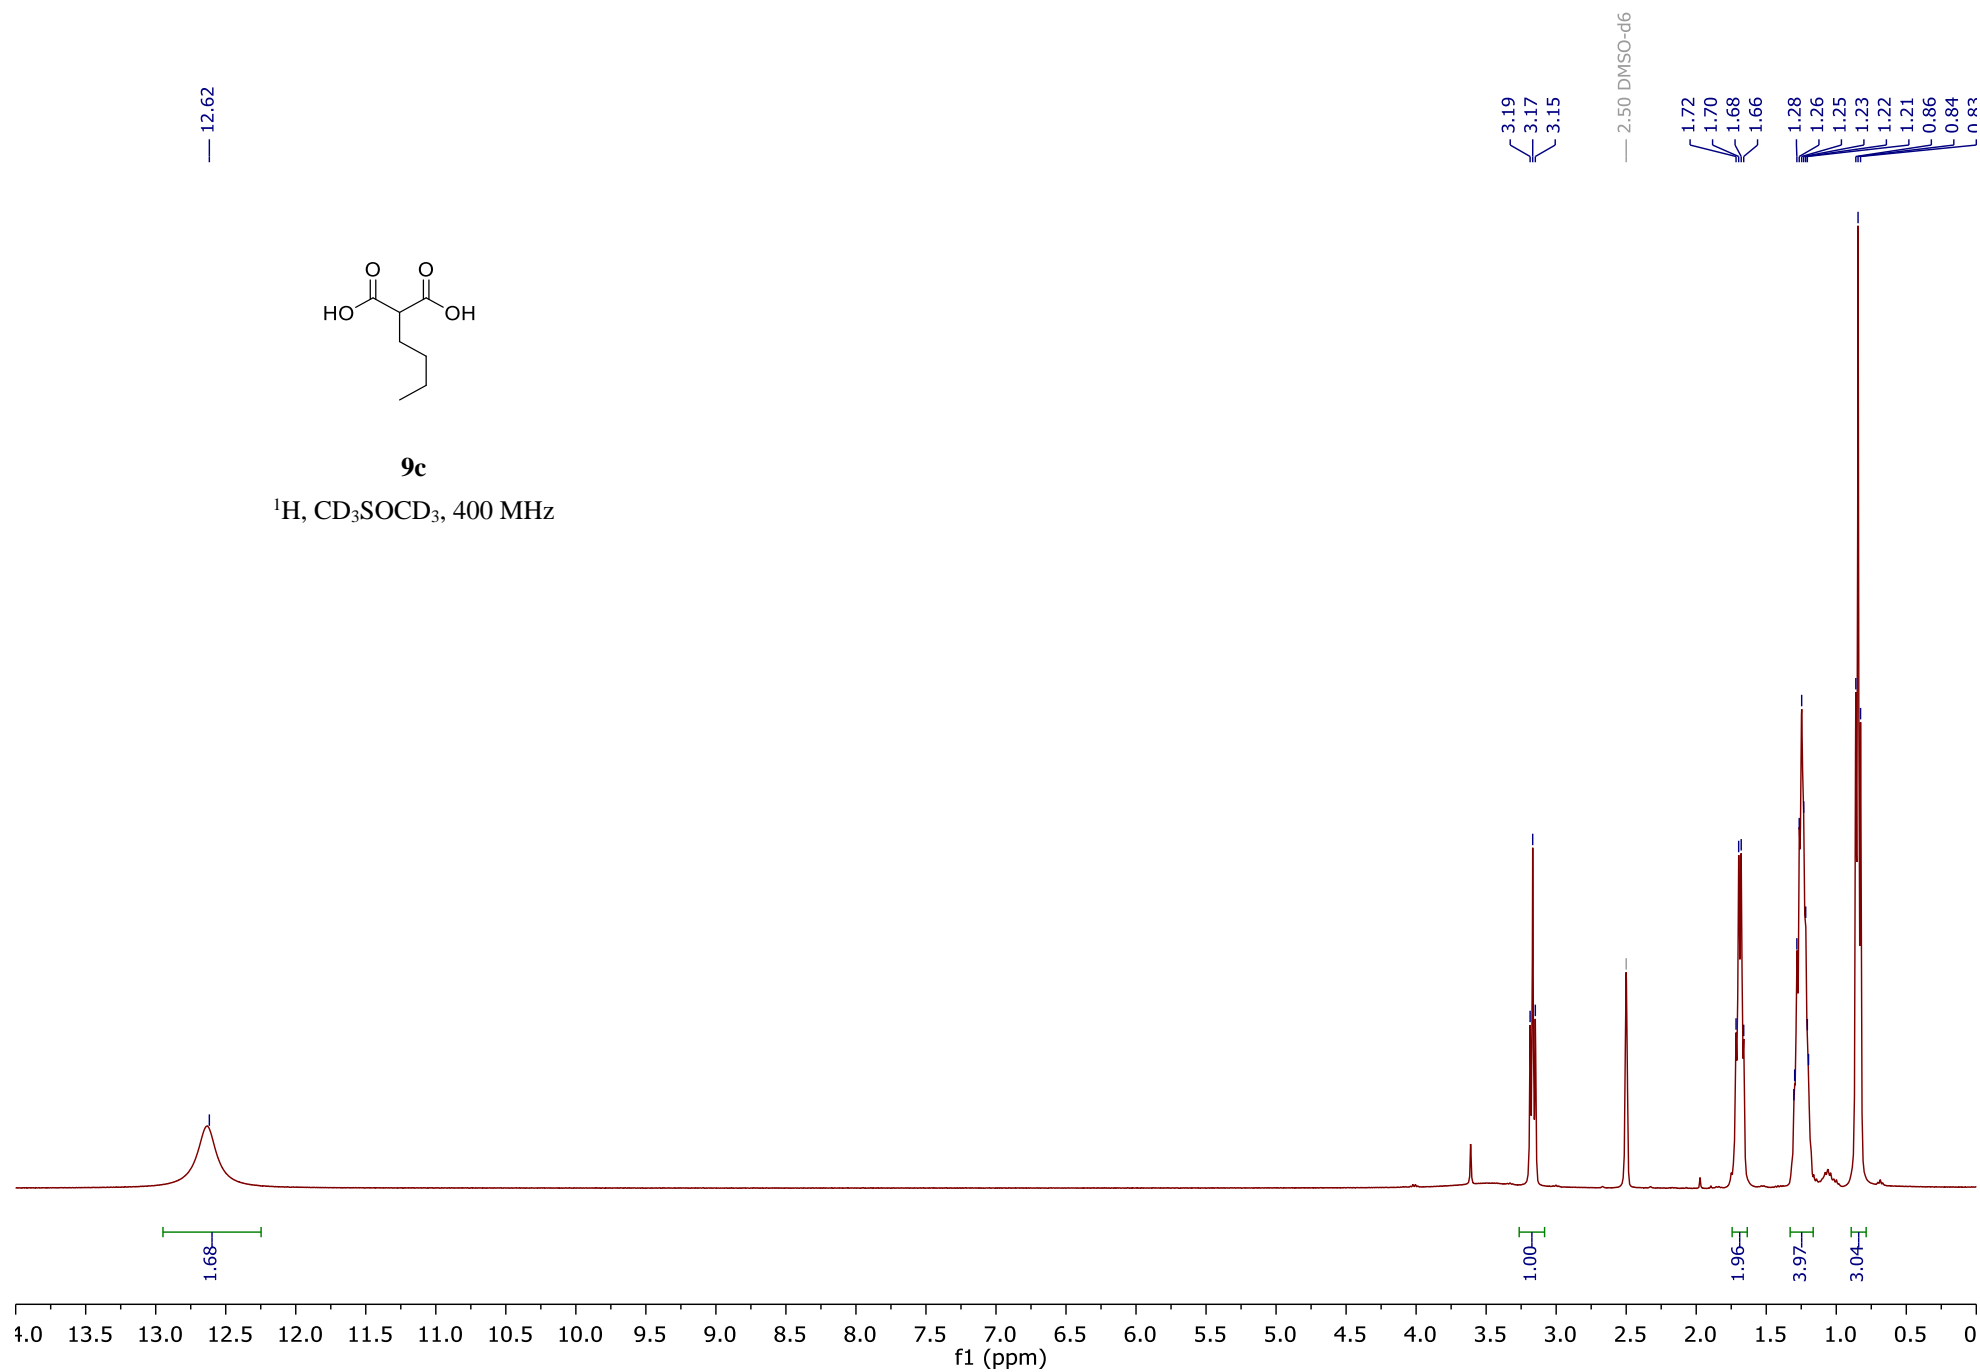

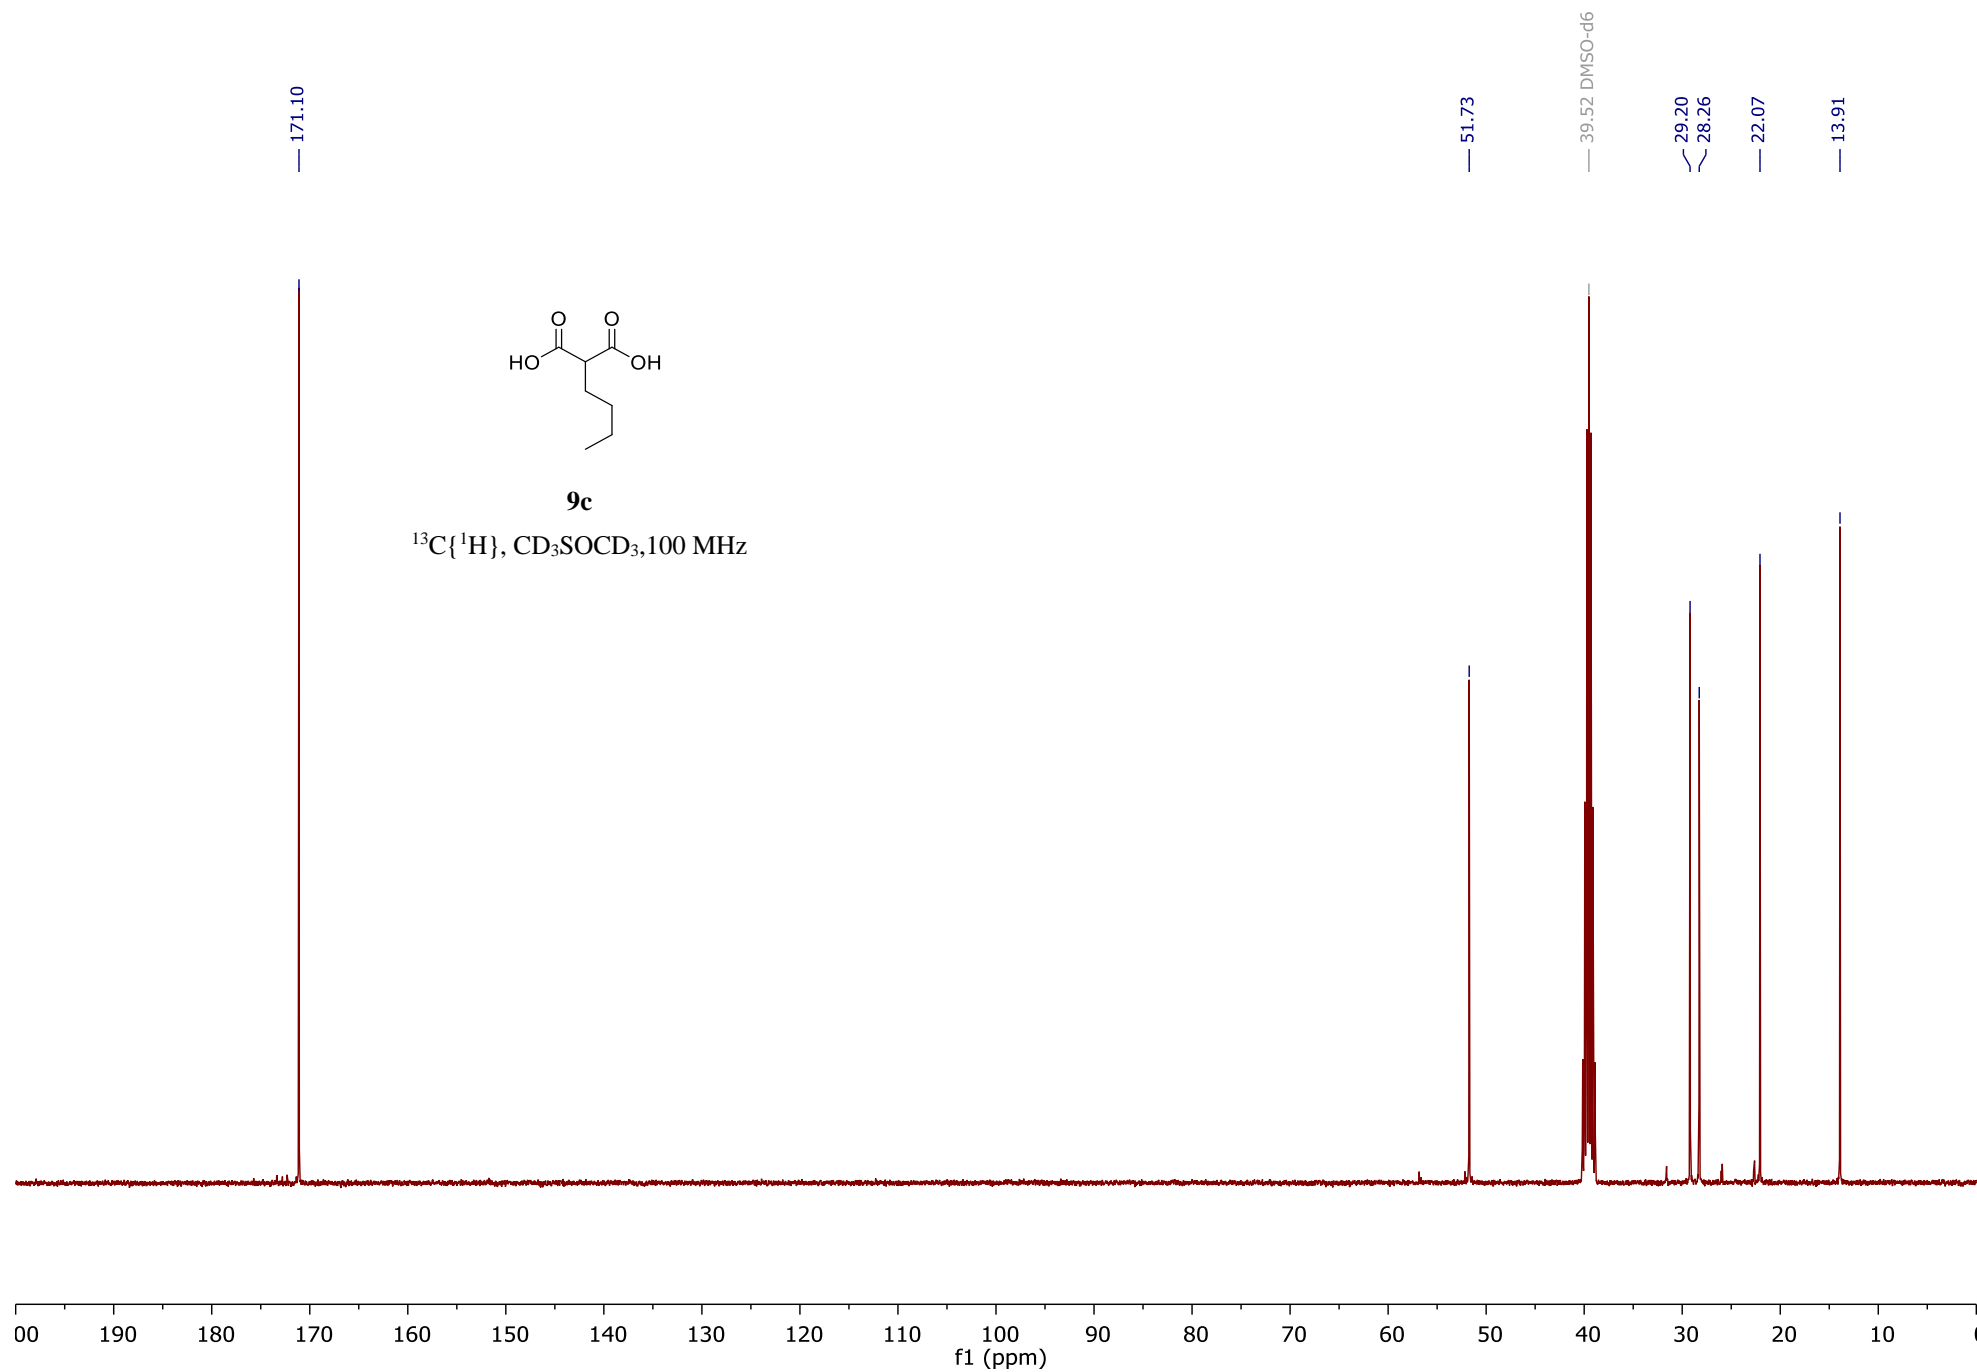

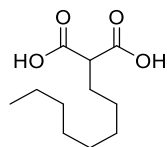

**9d**

$^1\text{H}$ ,  $\text{CD}_3\text{SOCD}_3$ , 400 MHz

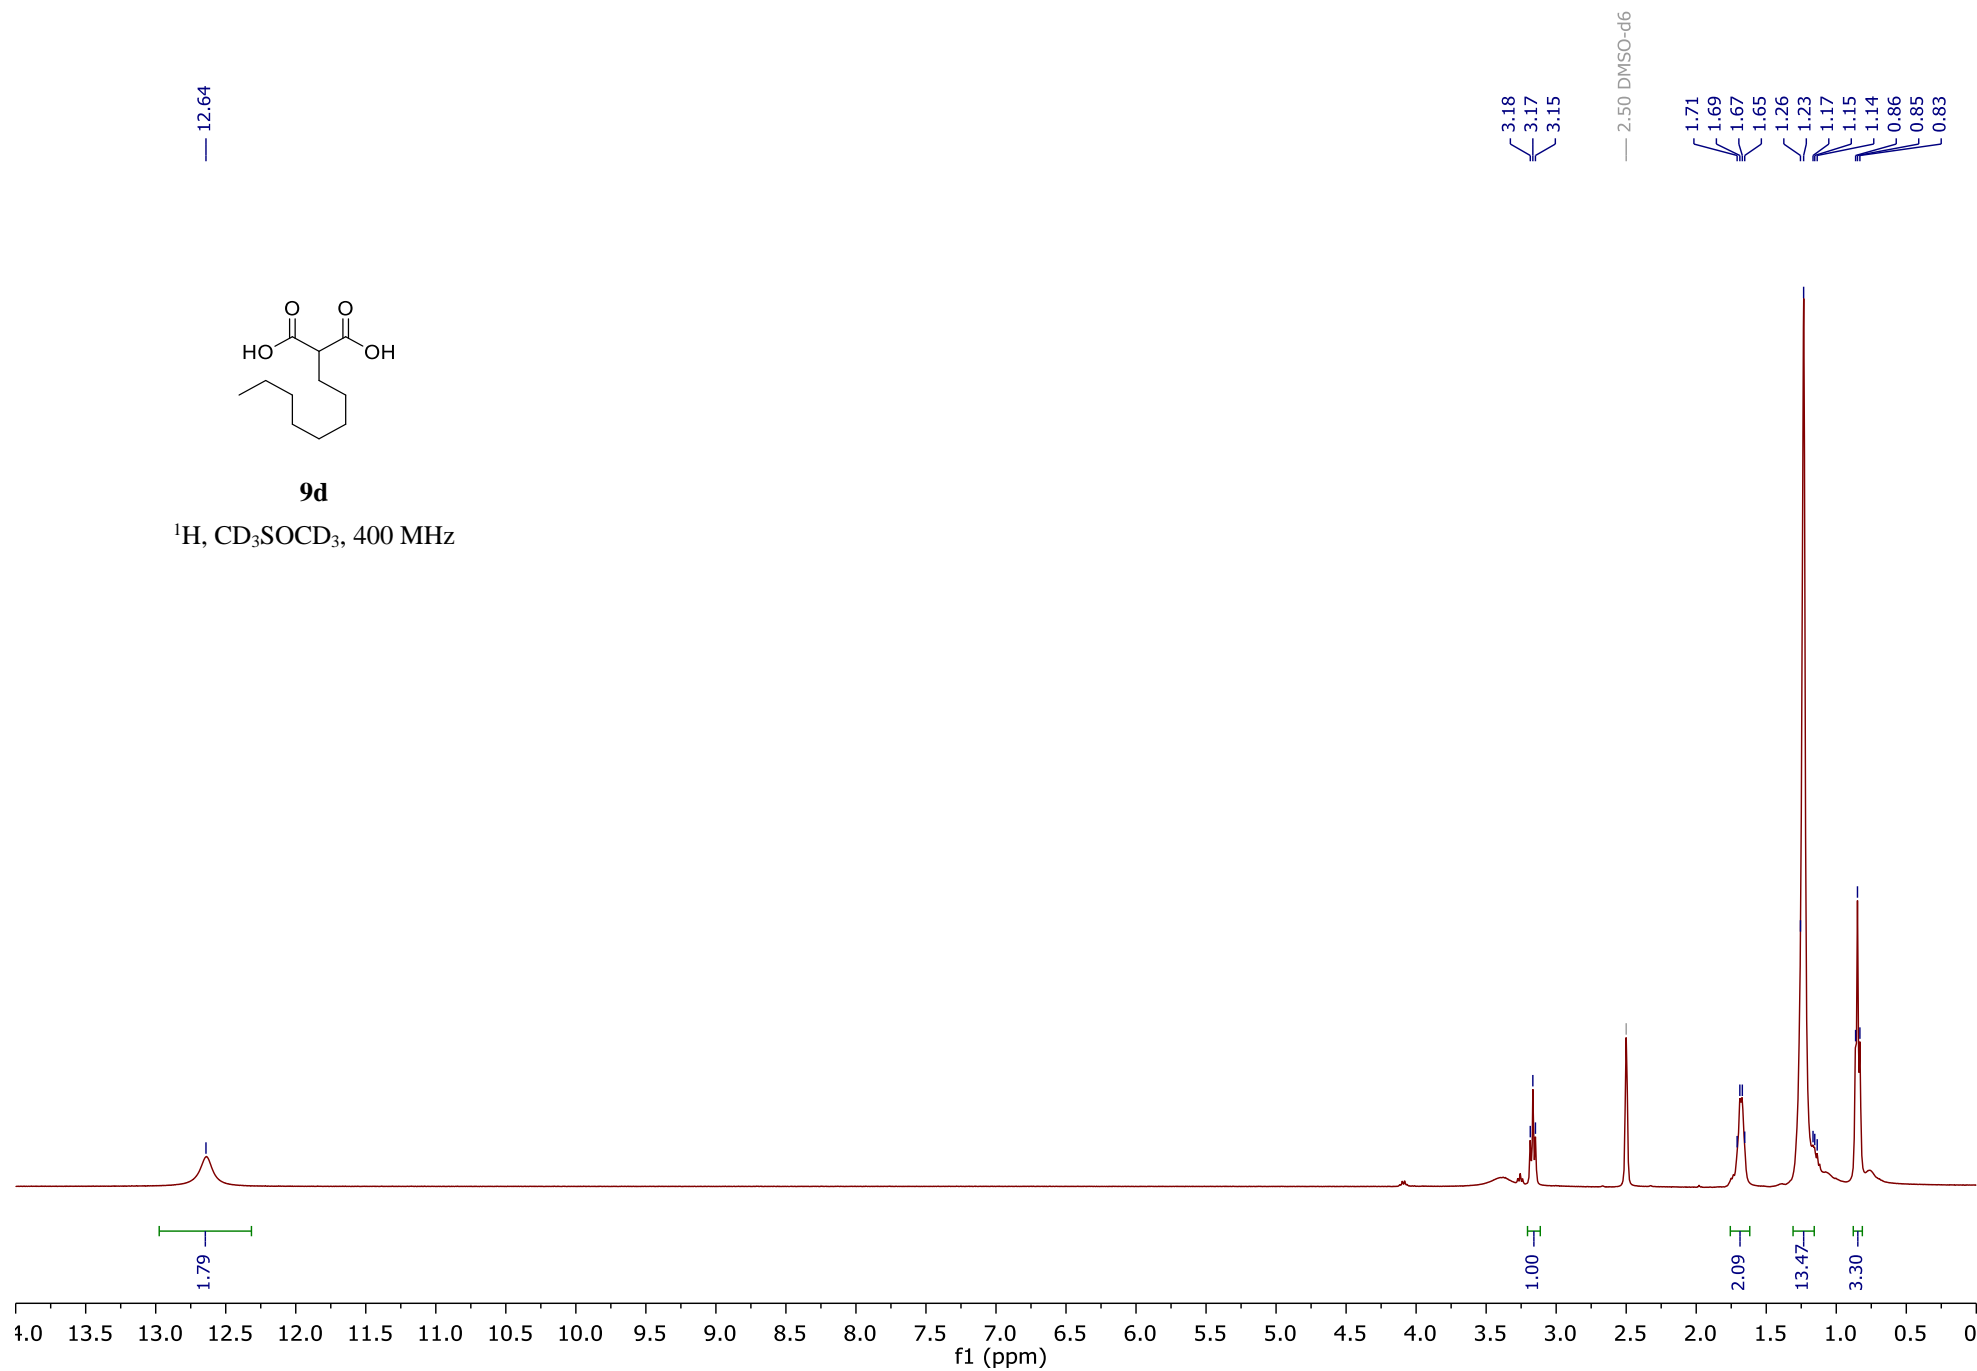

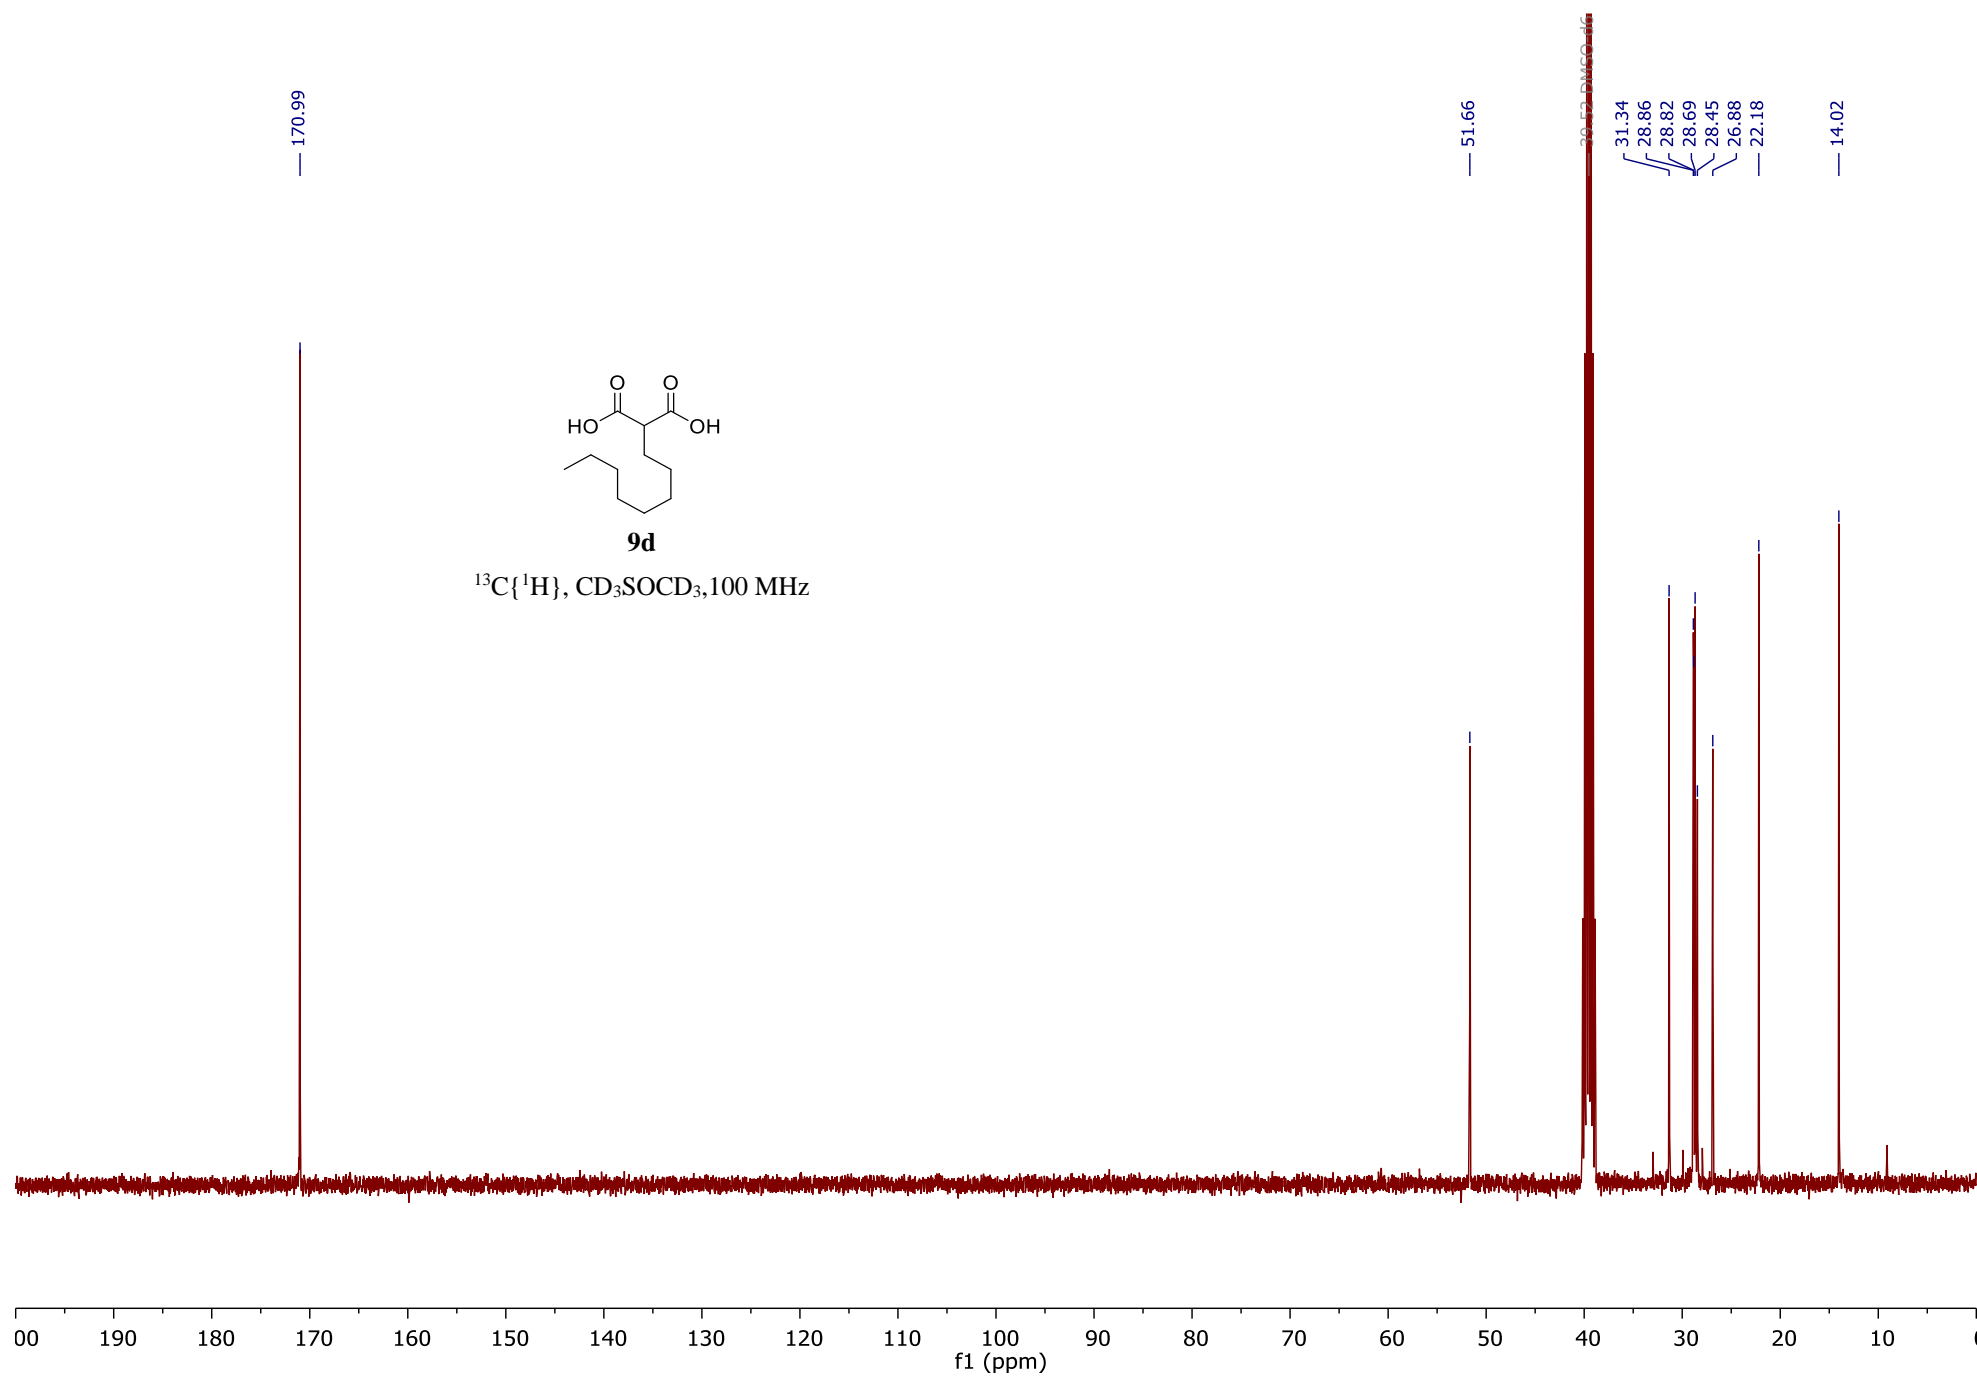

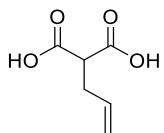

**9f**

$^1\text{H}$ ,  $\text{CD}_3\text{COCD}_3$ , 400 MHz

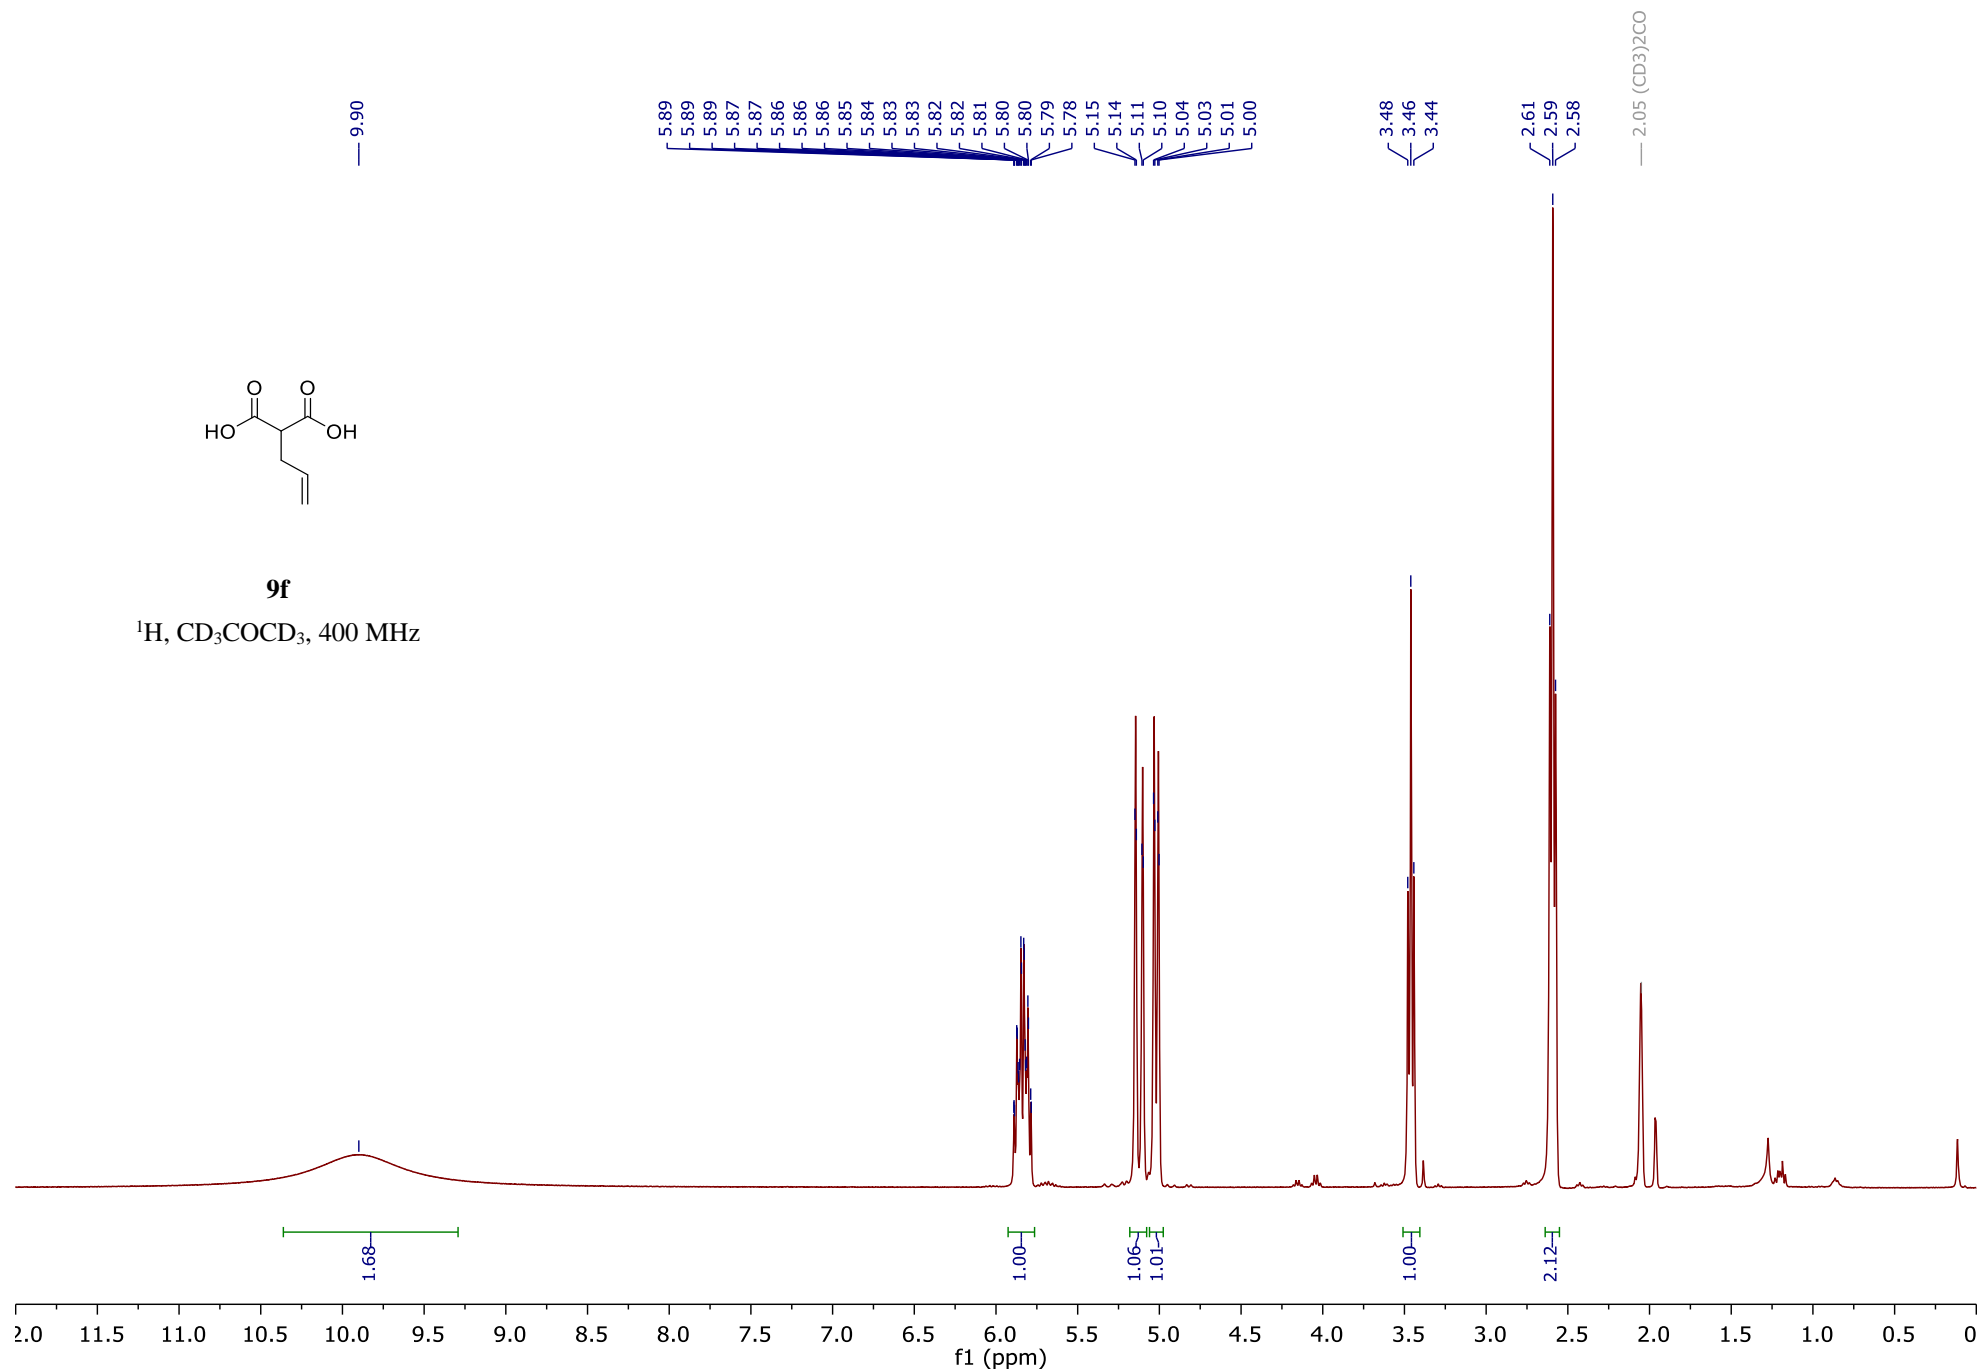



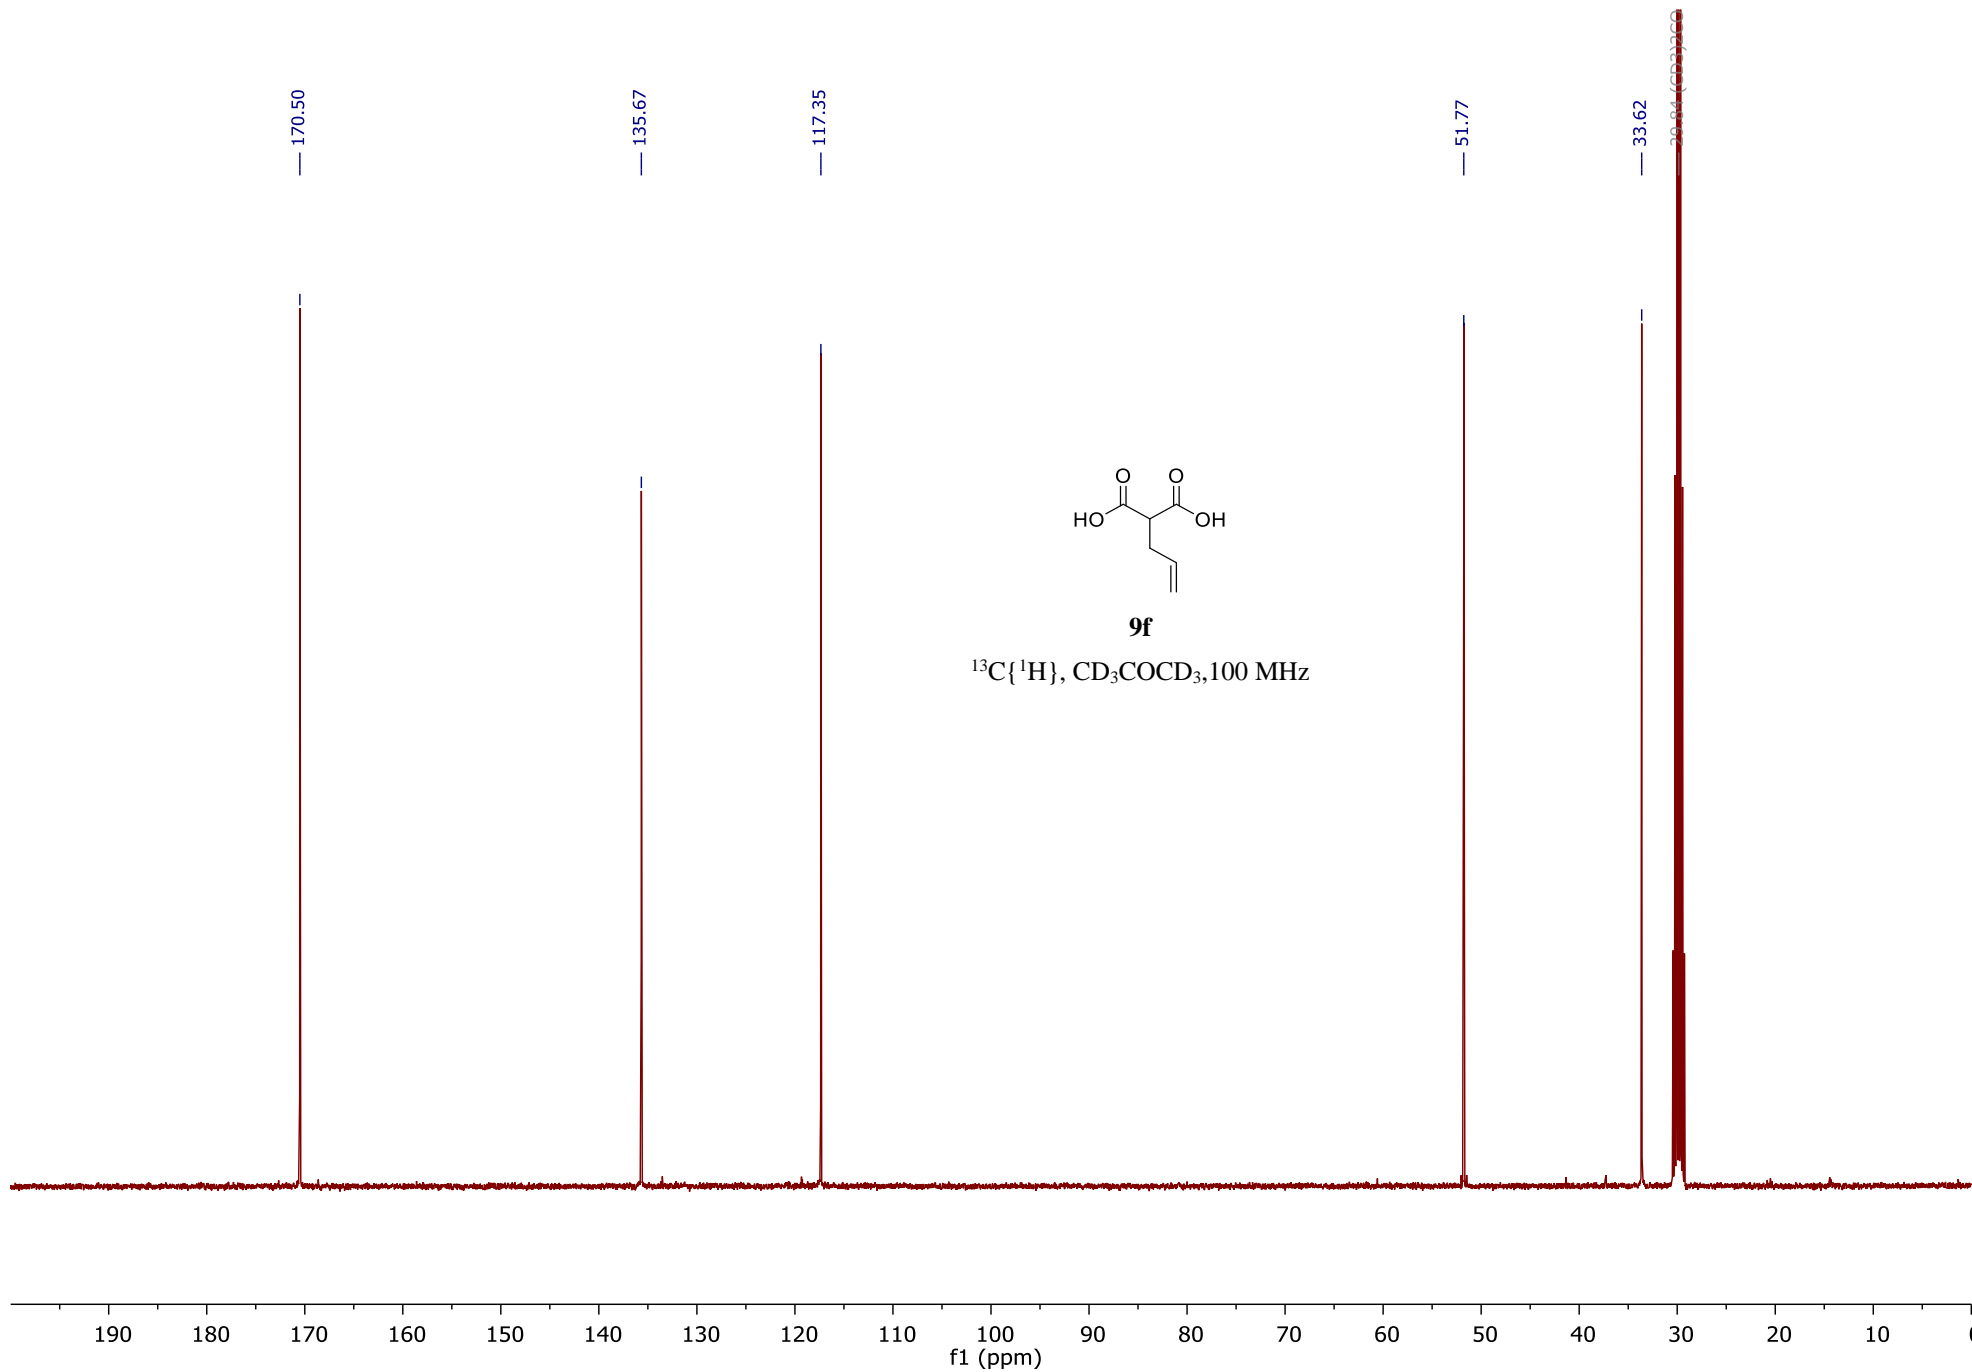

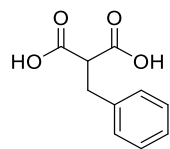

**9h**

$^1\text{H}$ ,  $\text{CD}_3\text{COCD}_3$ , 400 MHz

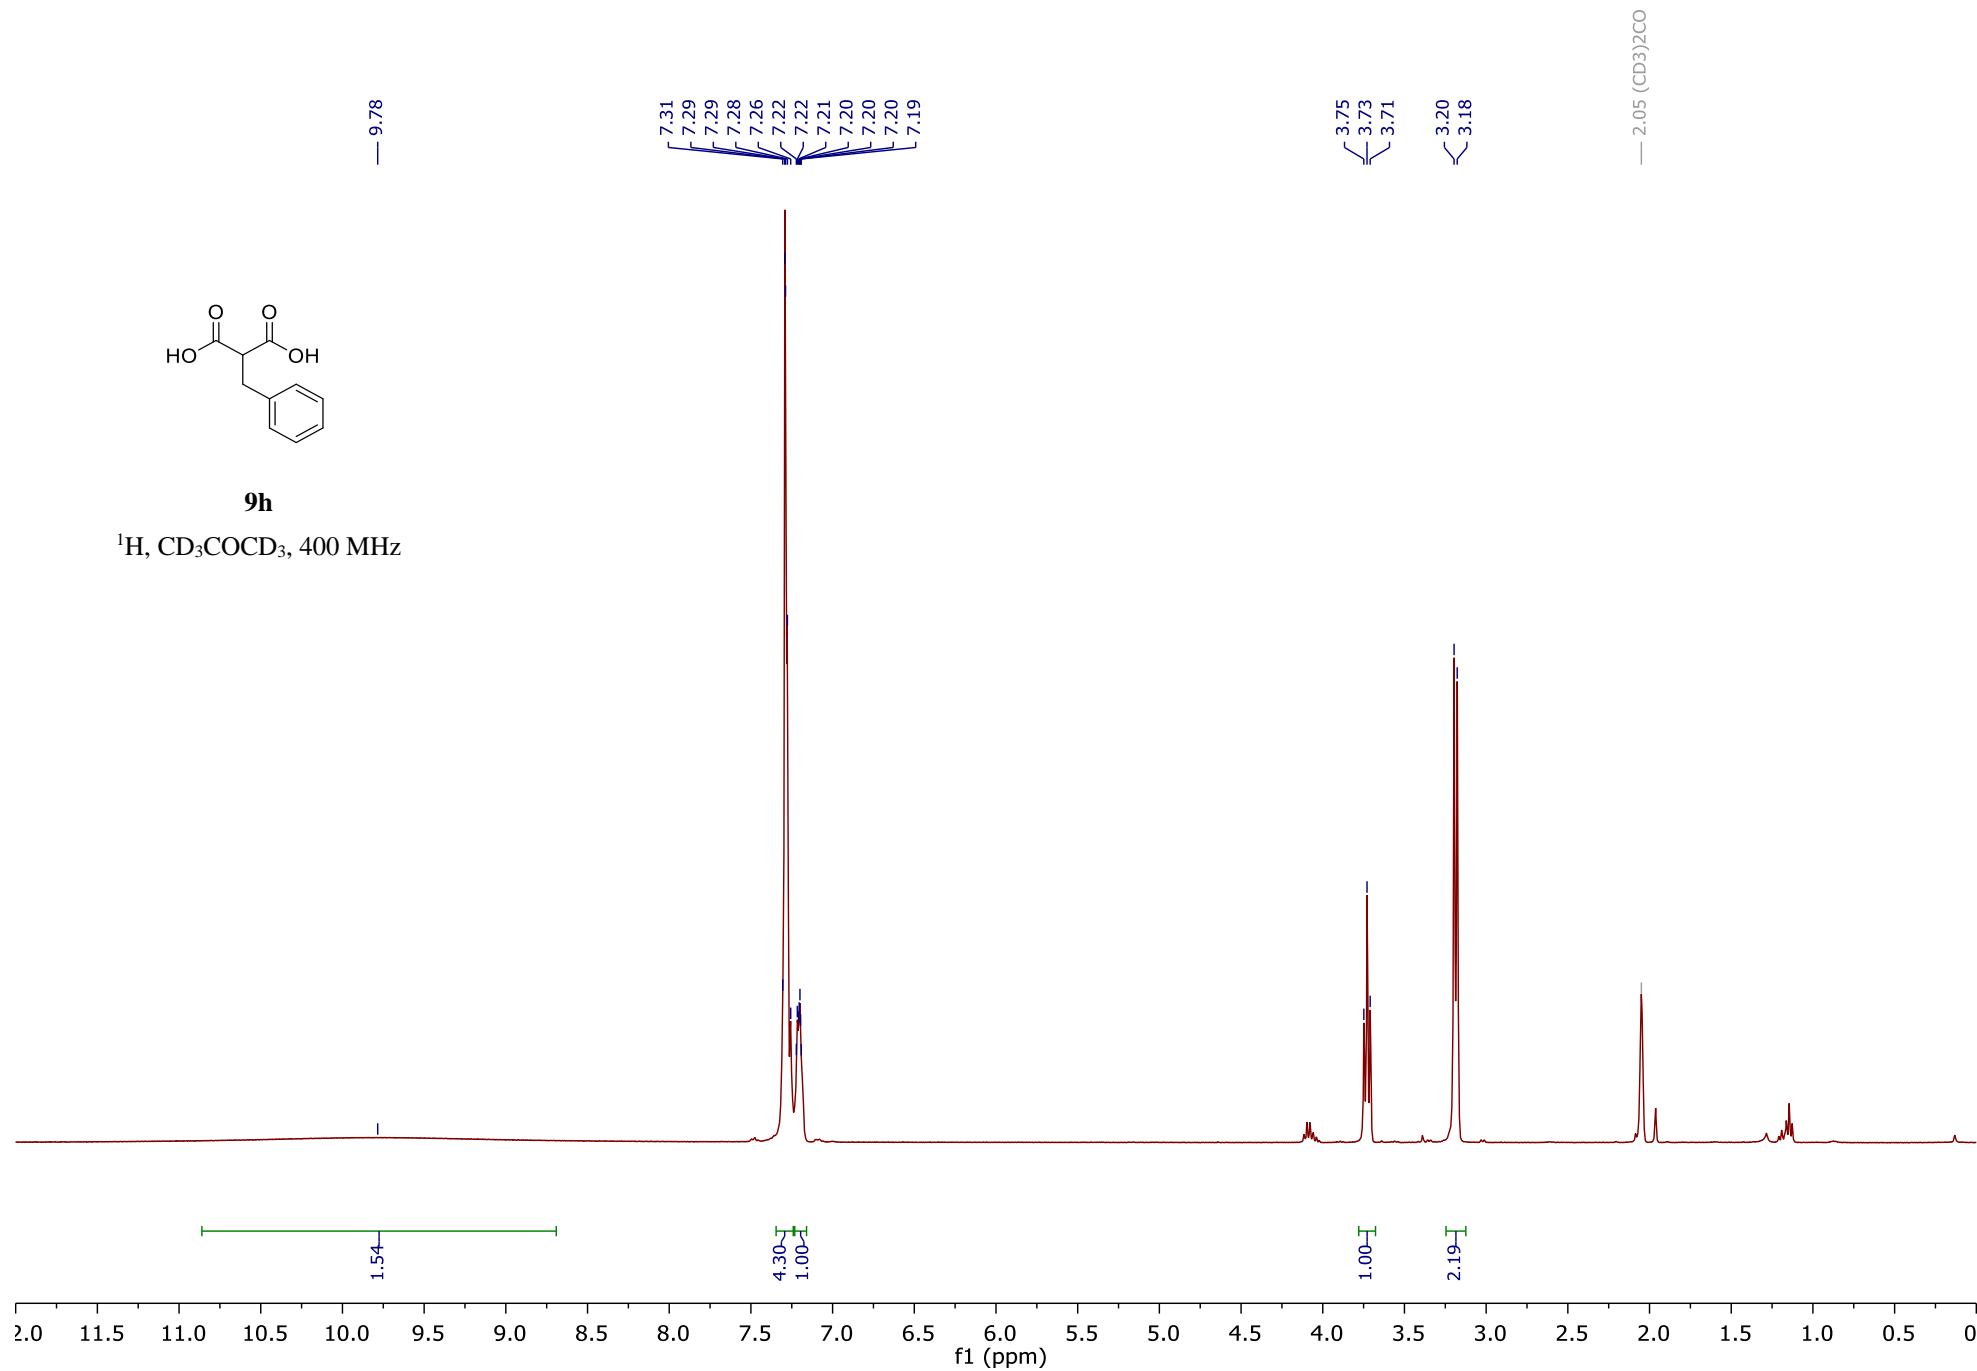

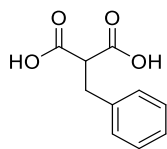

**9h**

$^{13}\text{C}\{^1\text{H}\}$ ,  $\text{CD}_3\text{COCD}_3$ , 100 MHz

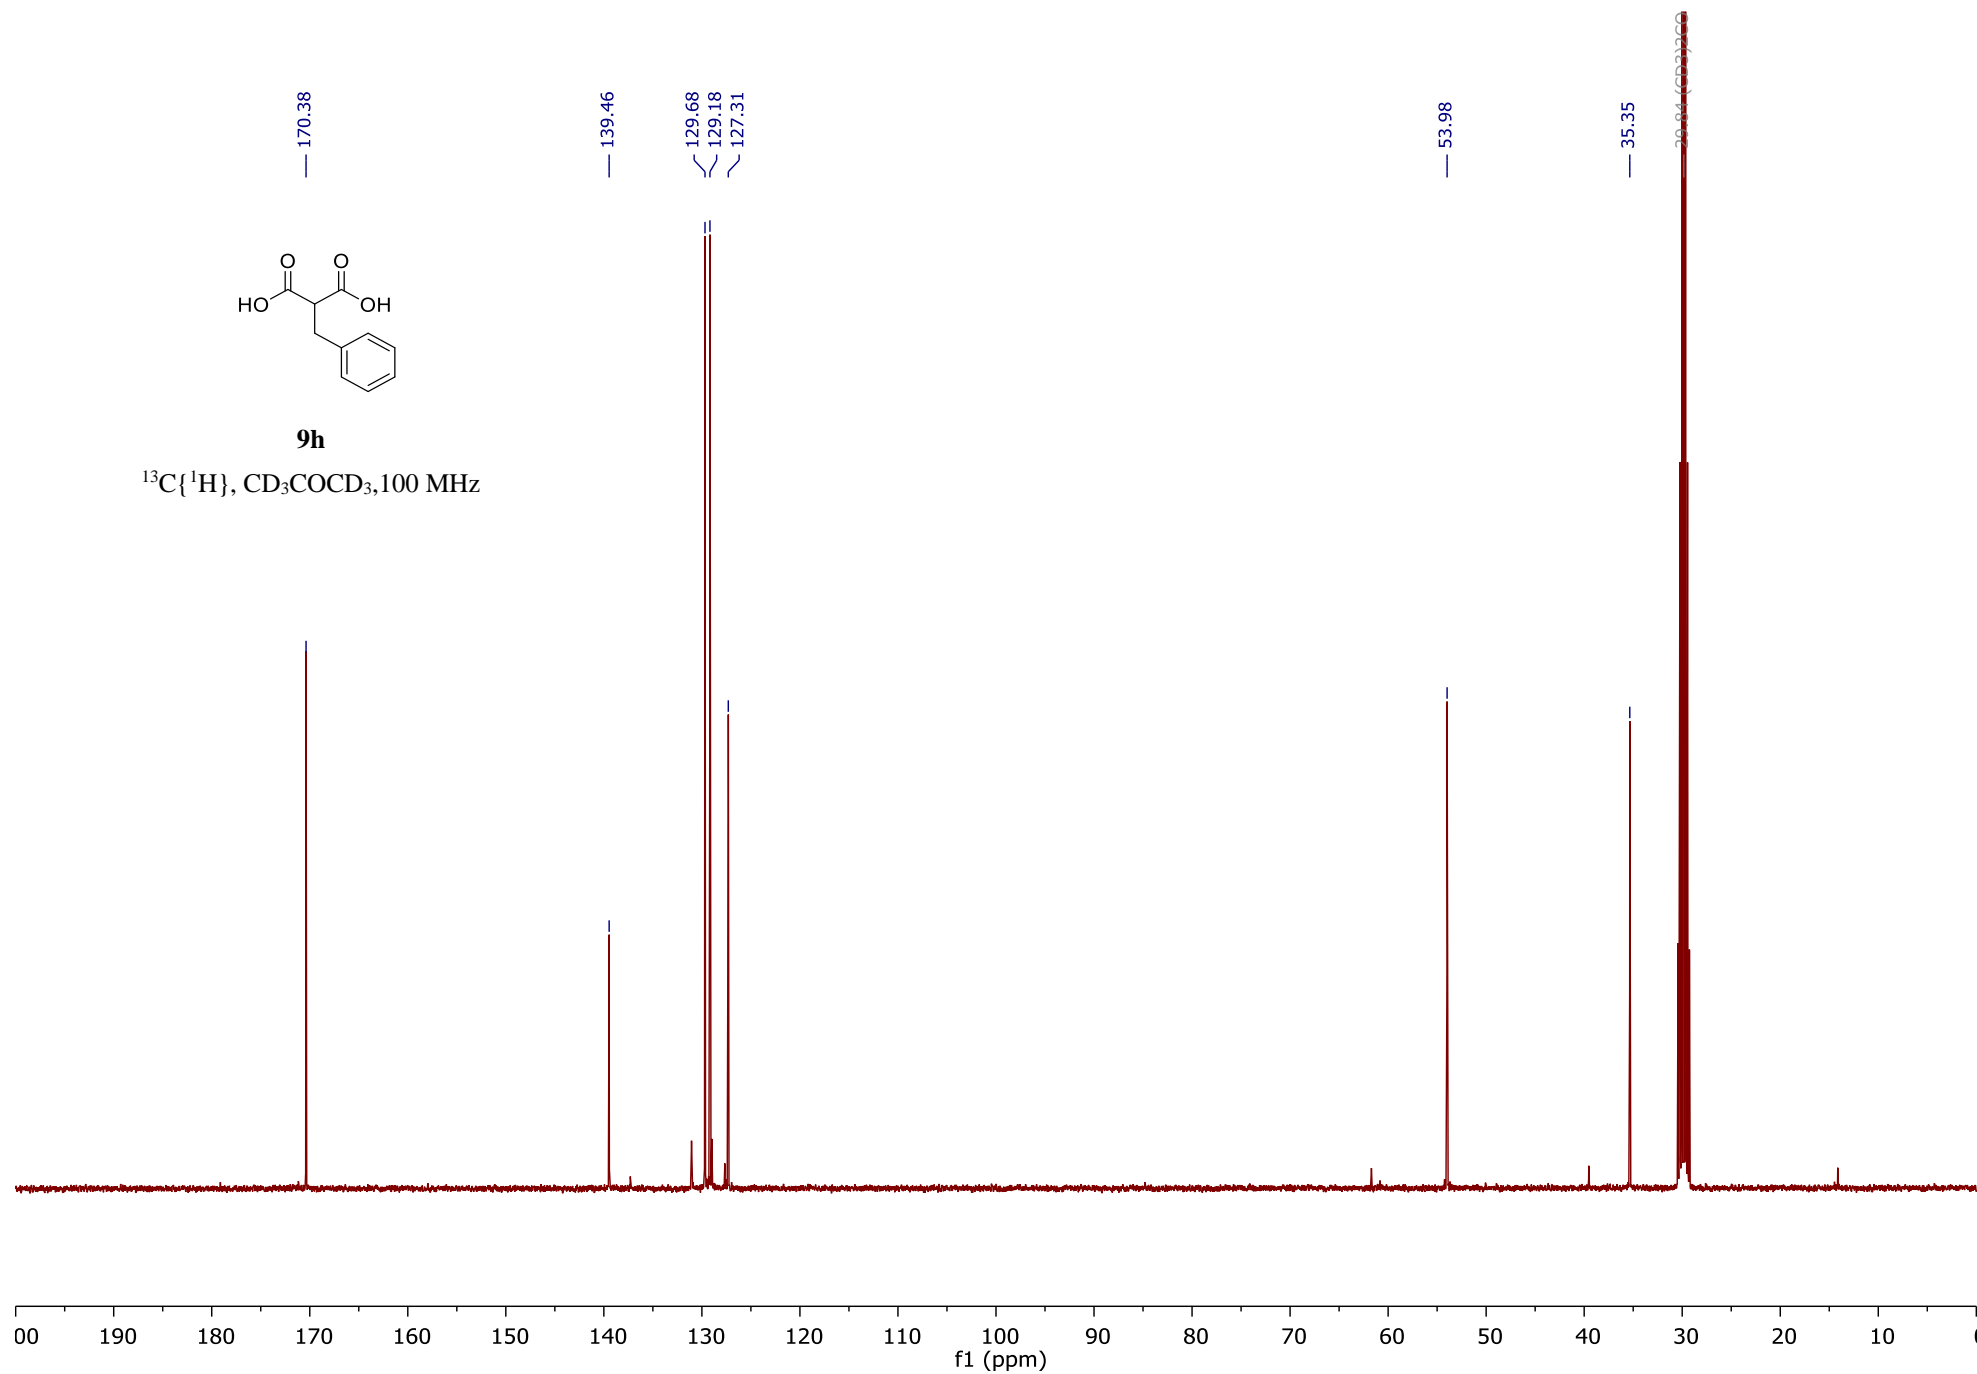

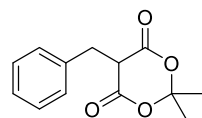

**7h**

$^1\text{H}$ ,  $\text{CDCl}_3$ , 400 MHz

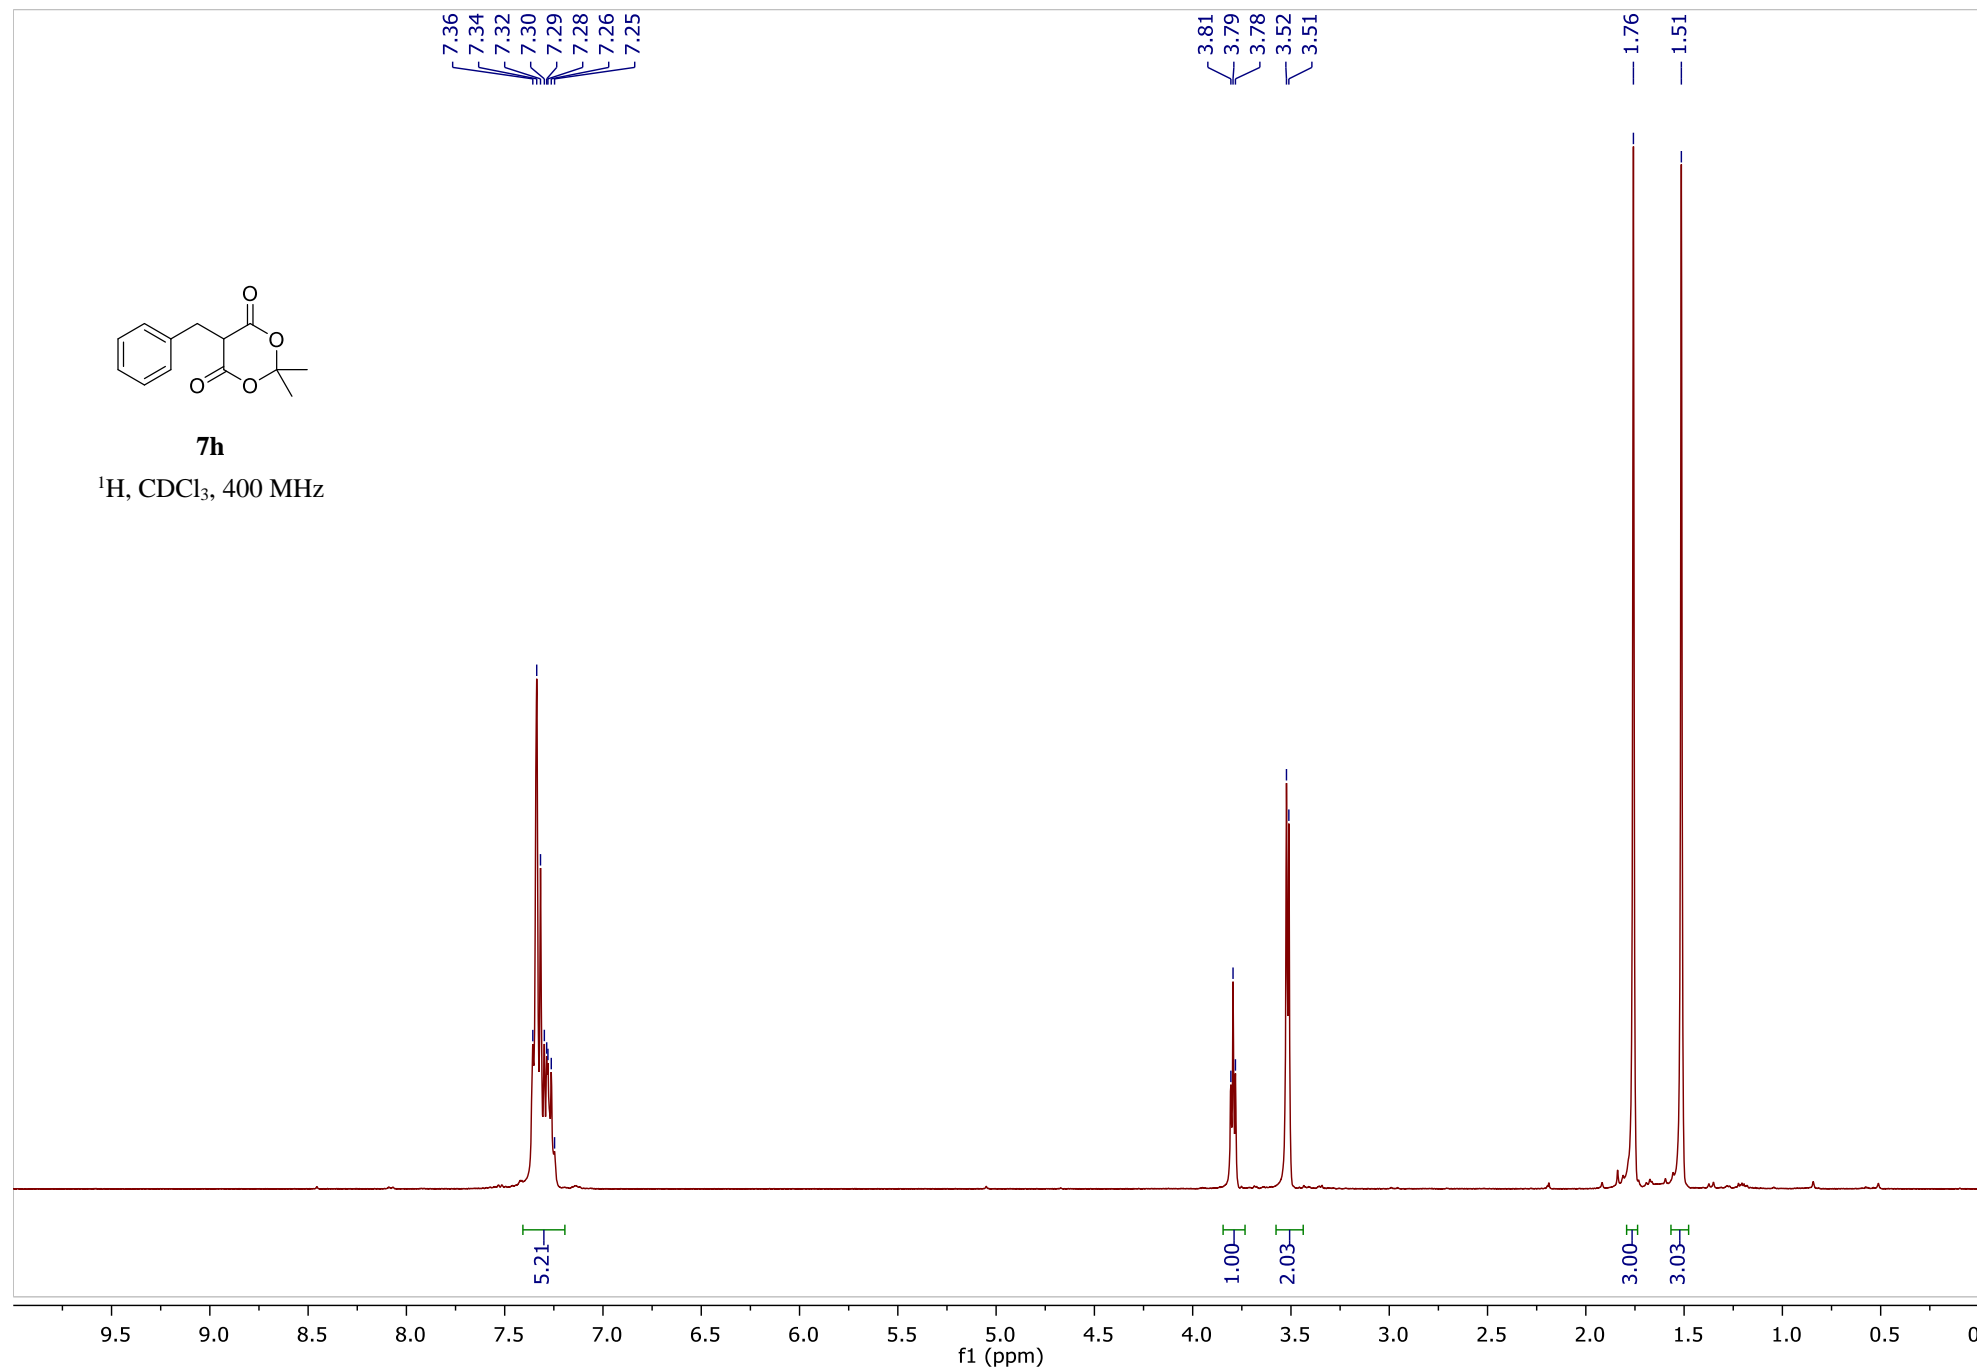

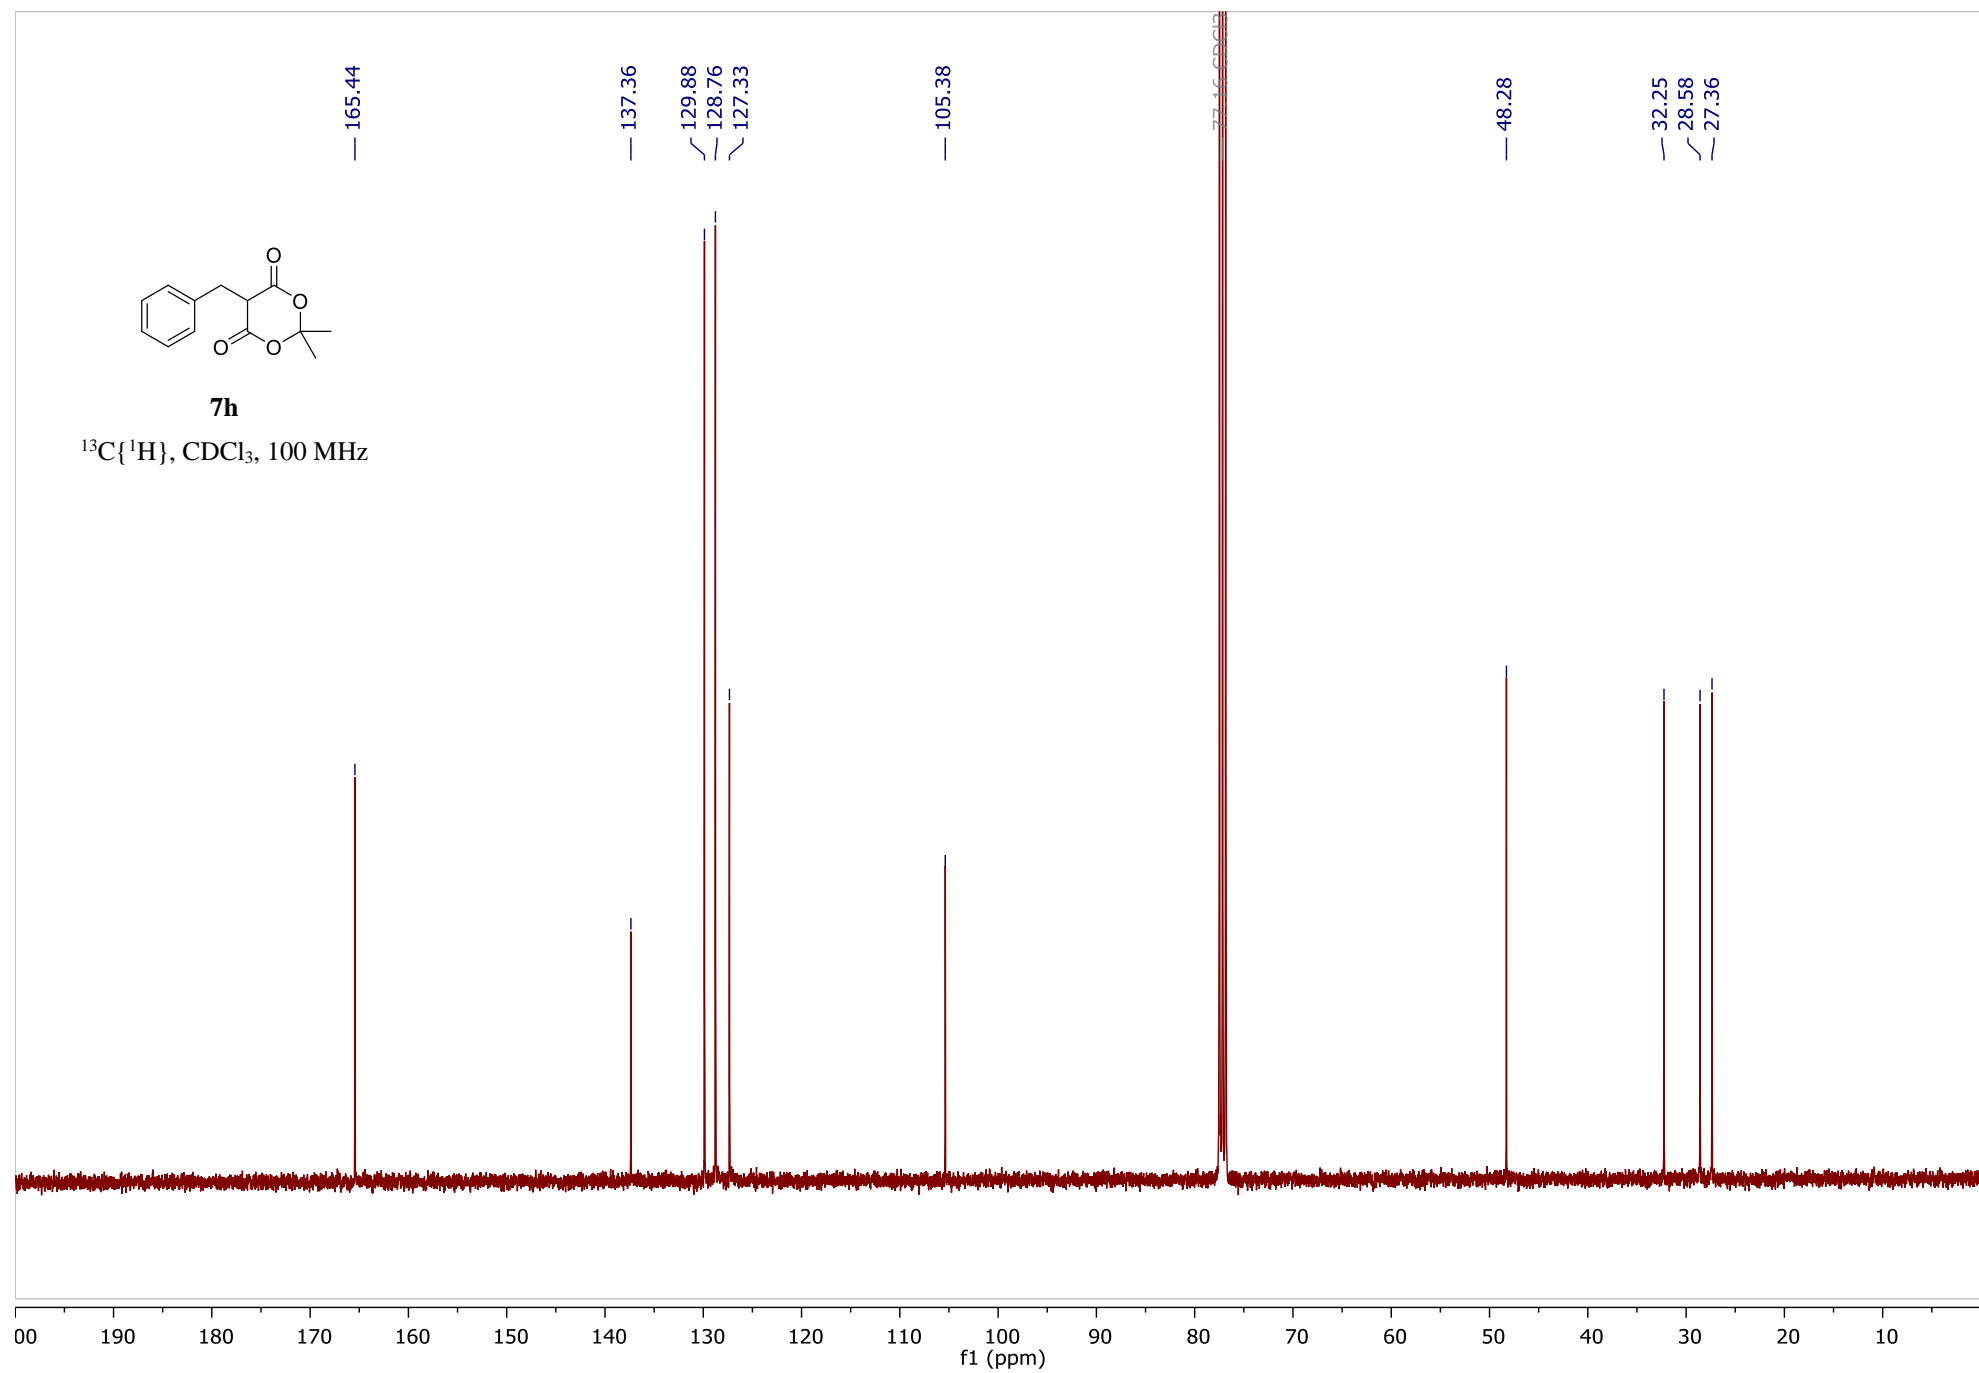

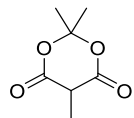

**7a**

$^1\text{H}$ ,  $\text{CDCl}_3$ , 400 MHz

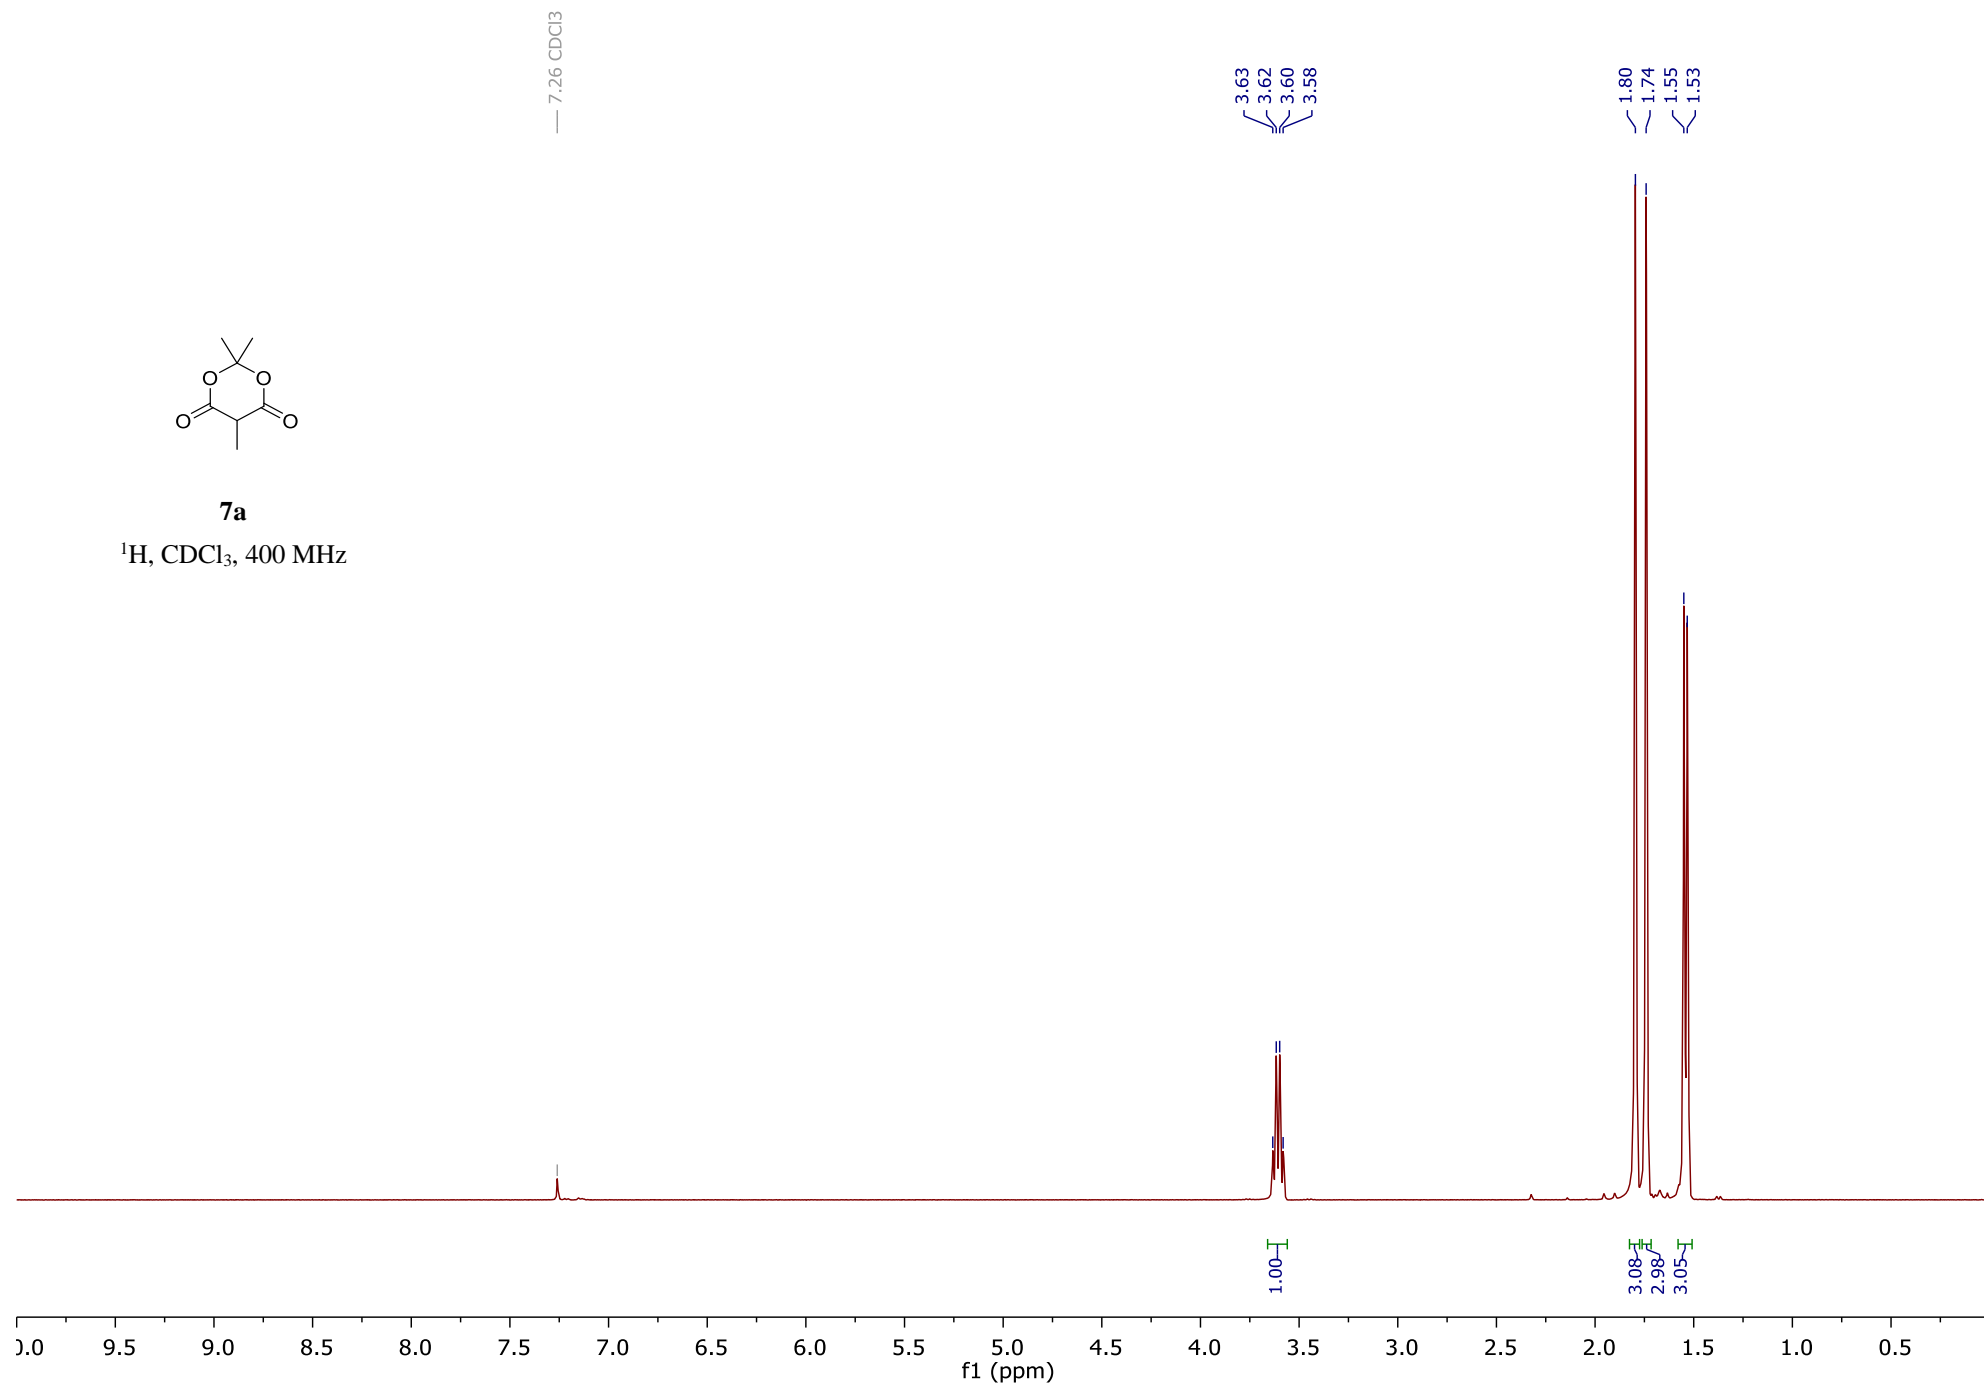

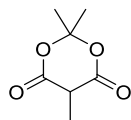

**7a**

$^{13}\text{C}\{^1\text{H}\}$ ,  $\text{CDCl}_3$ , 100 MHz

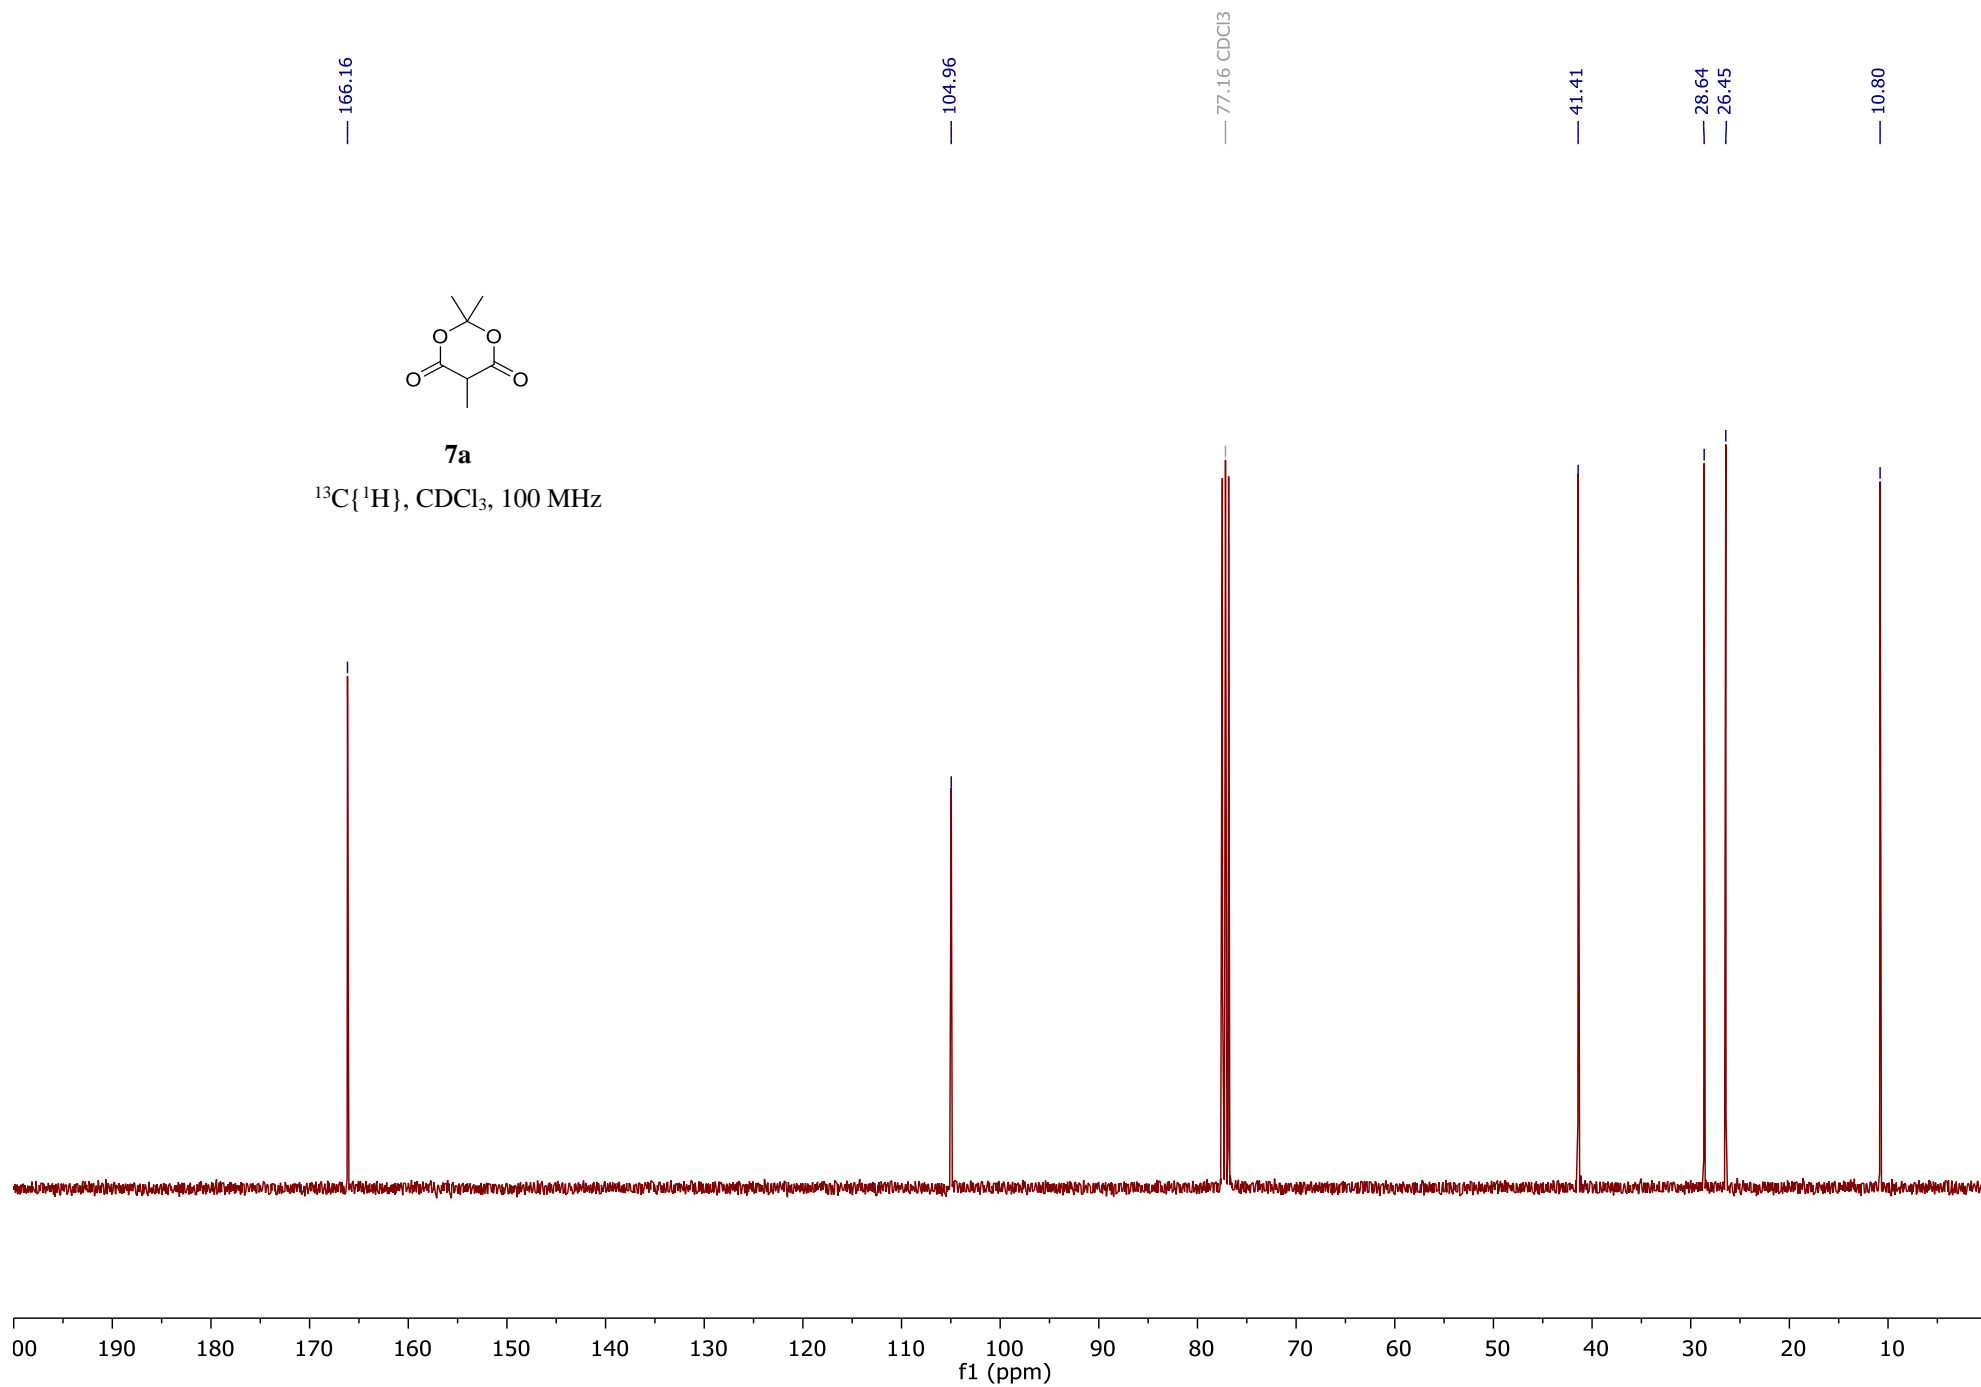

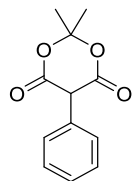

**7s**

$^1\text{H}$ ,  $\text{CDCl}_3$ , 400 MHz

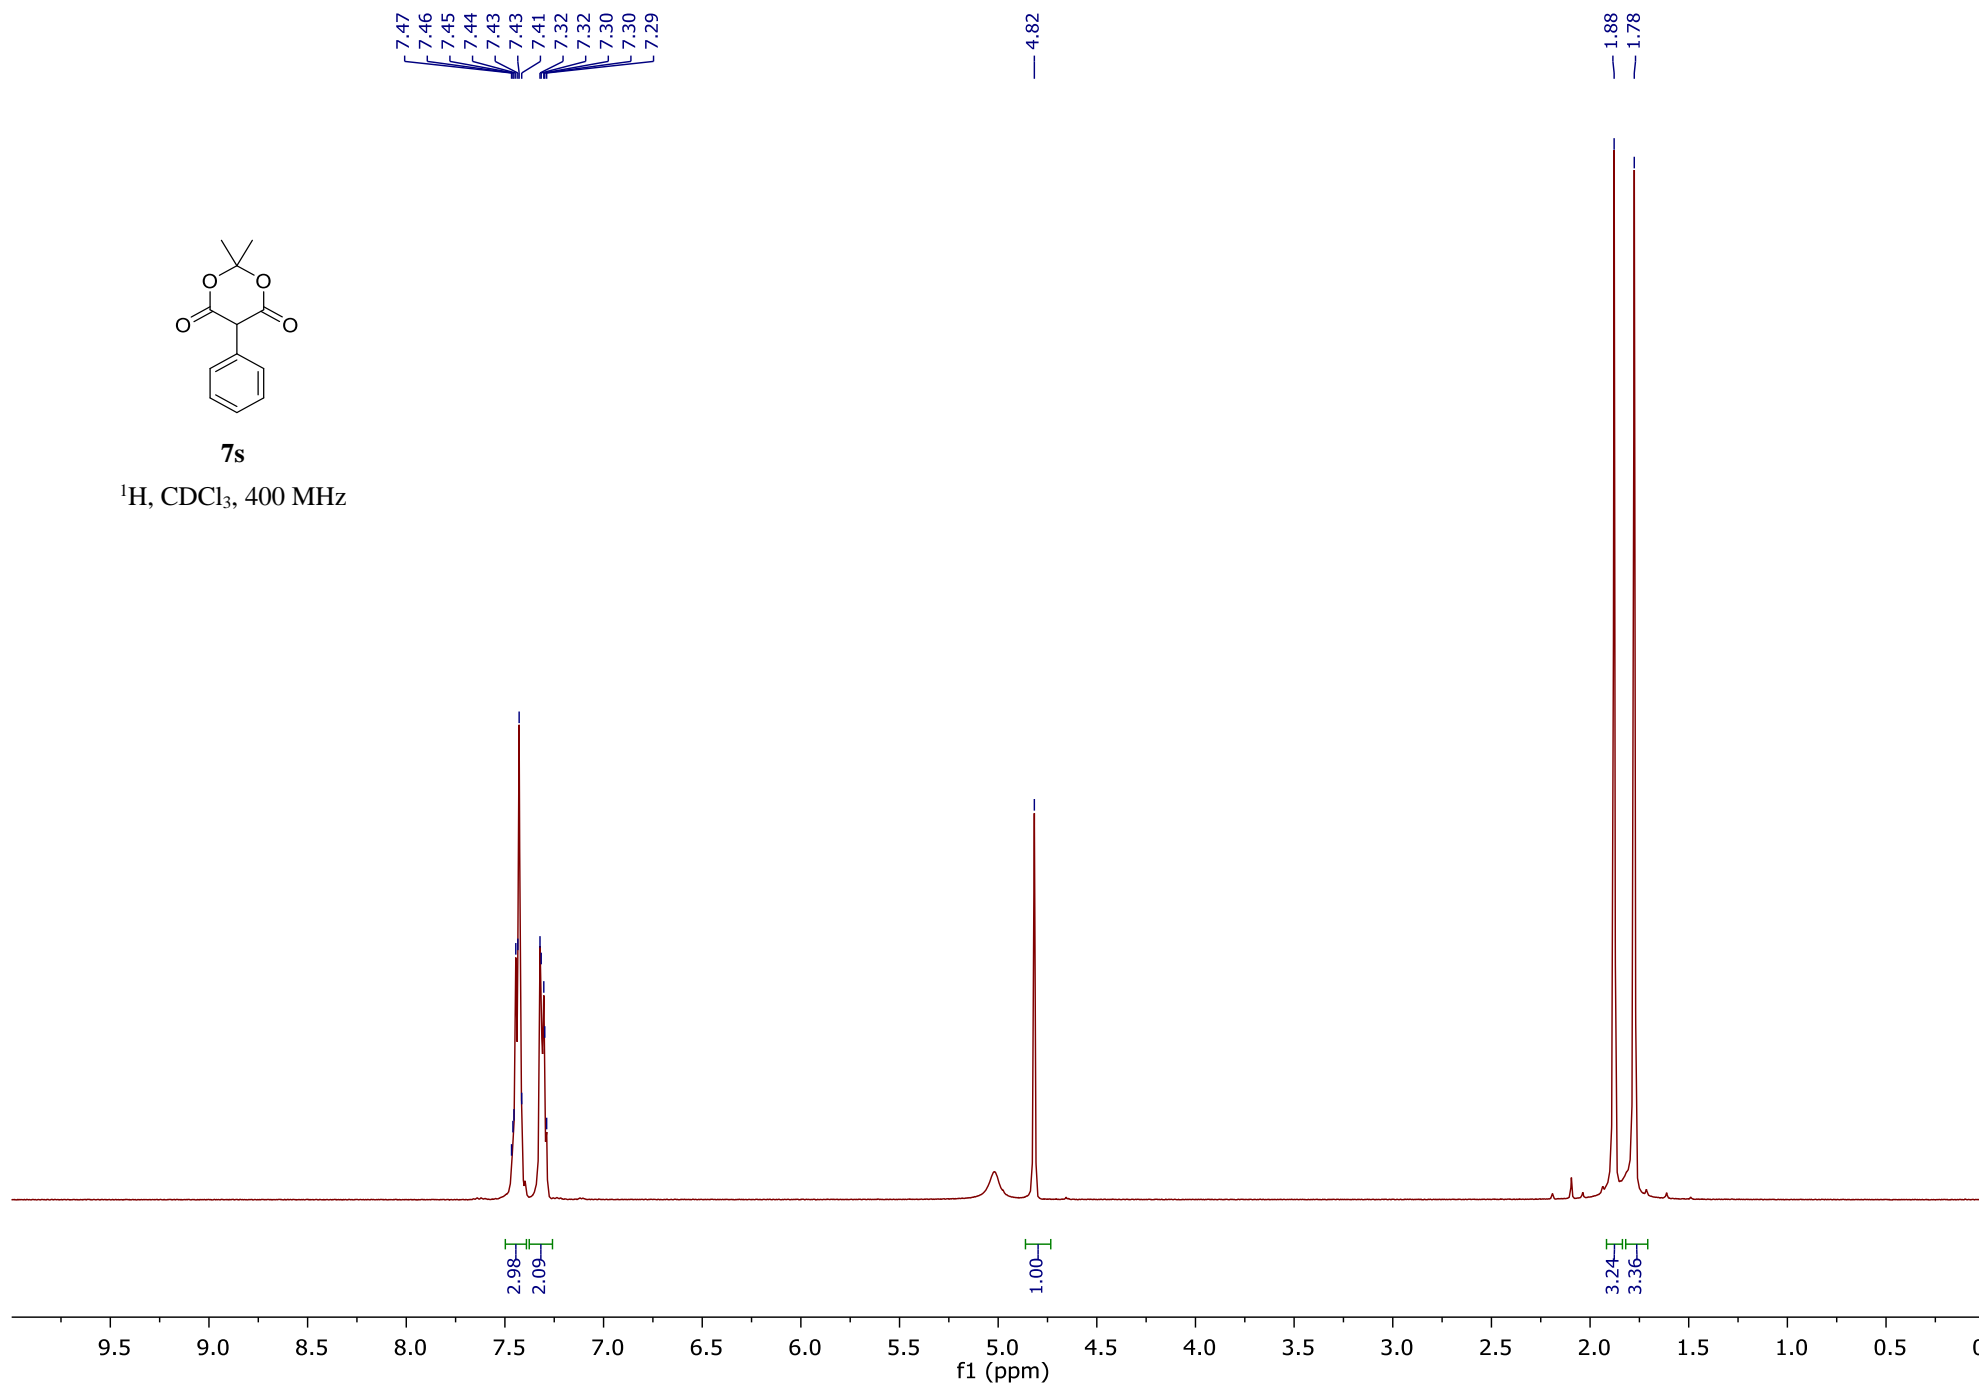



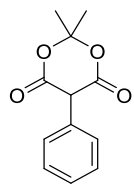

**7s**

$^{13}\text{C}\{^1\text{H}\}$ ,  $\text{CDCl}_3$ , 100 MHz

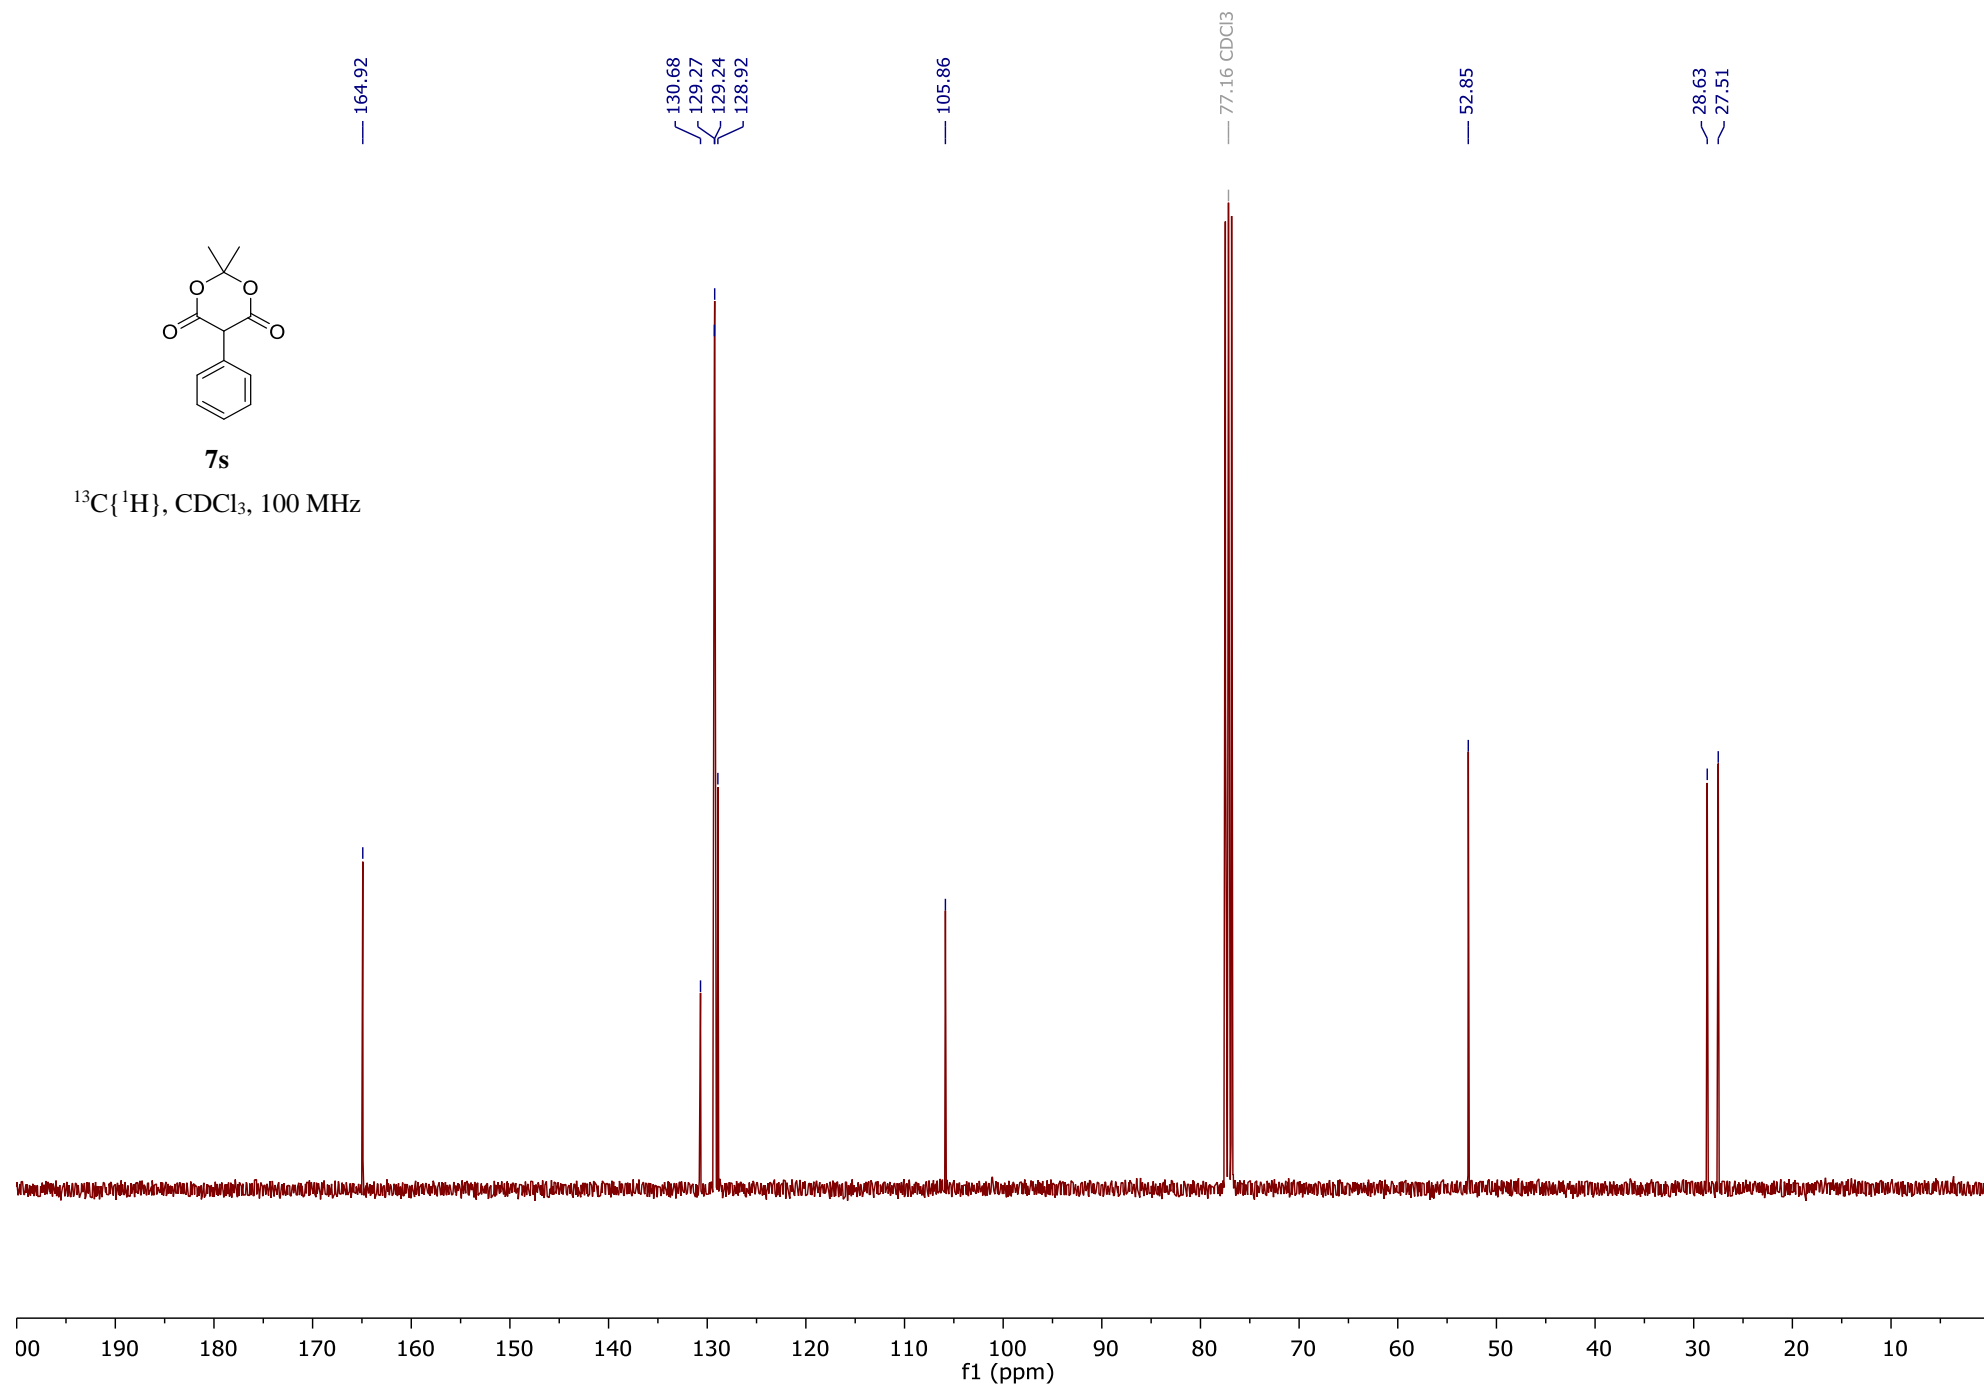

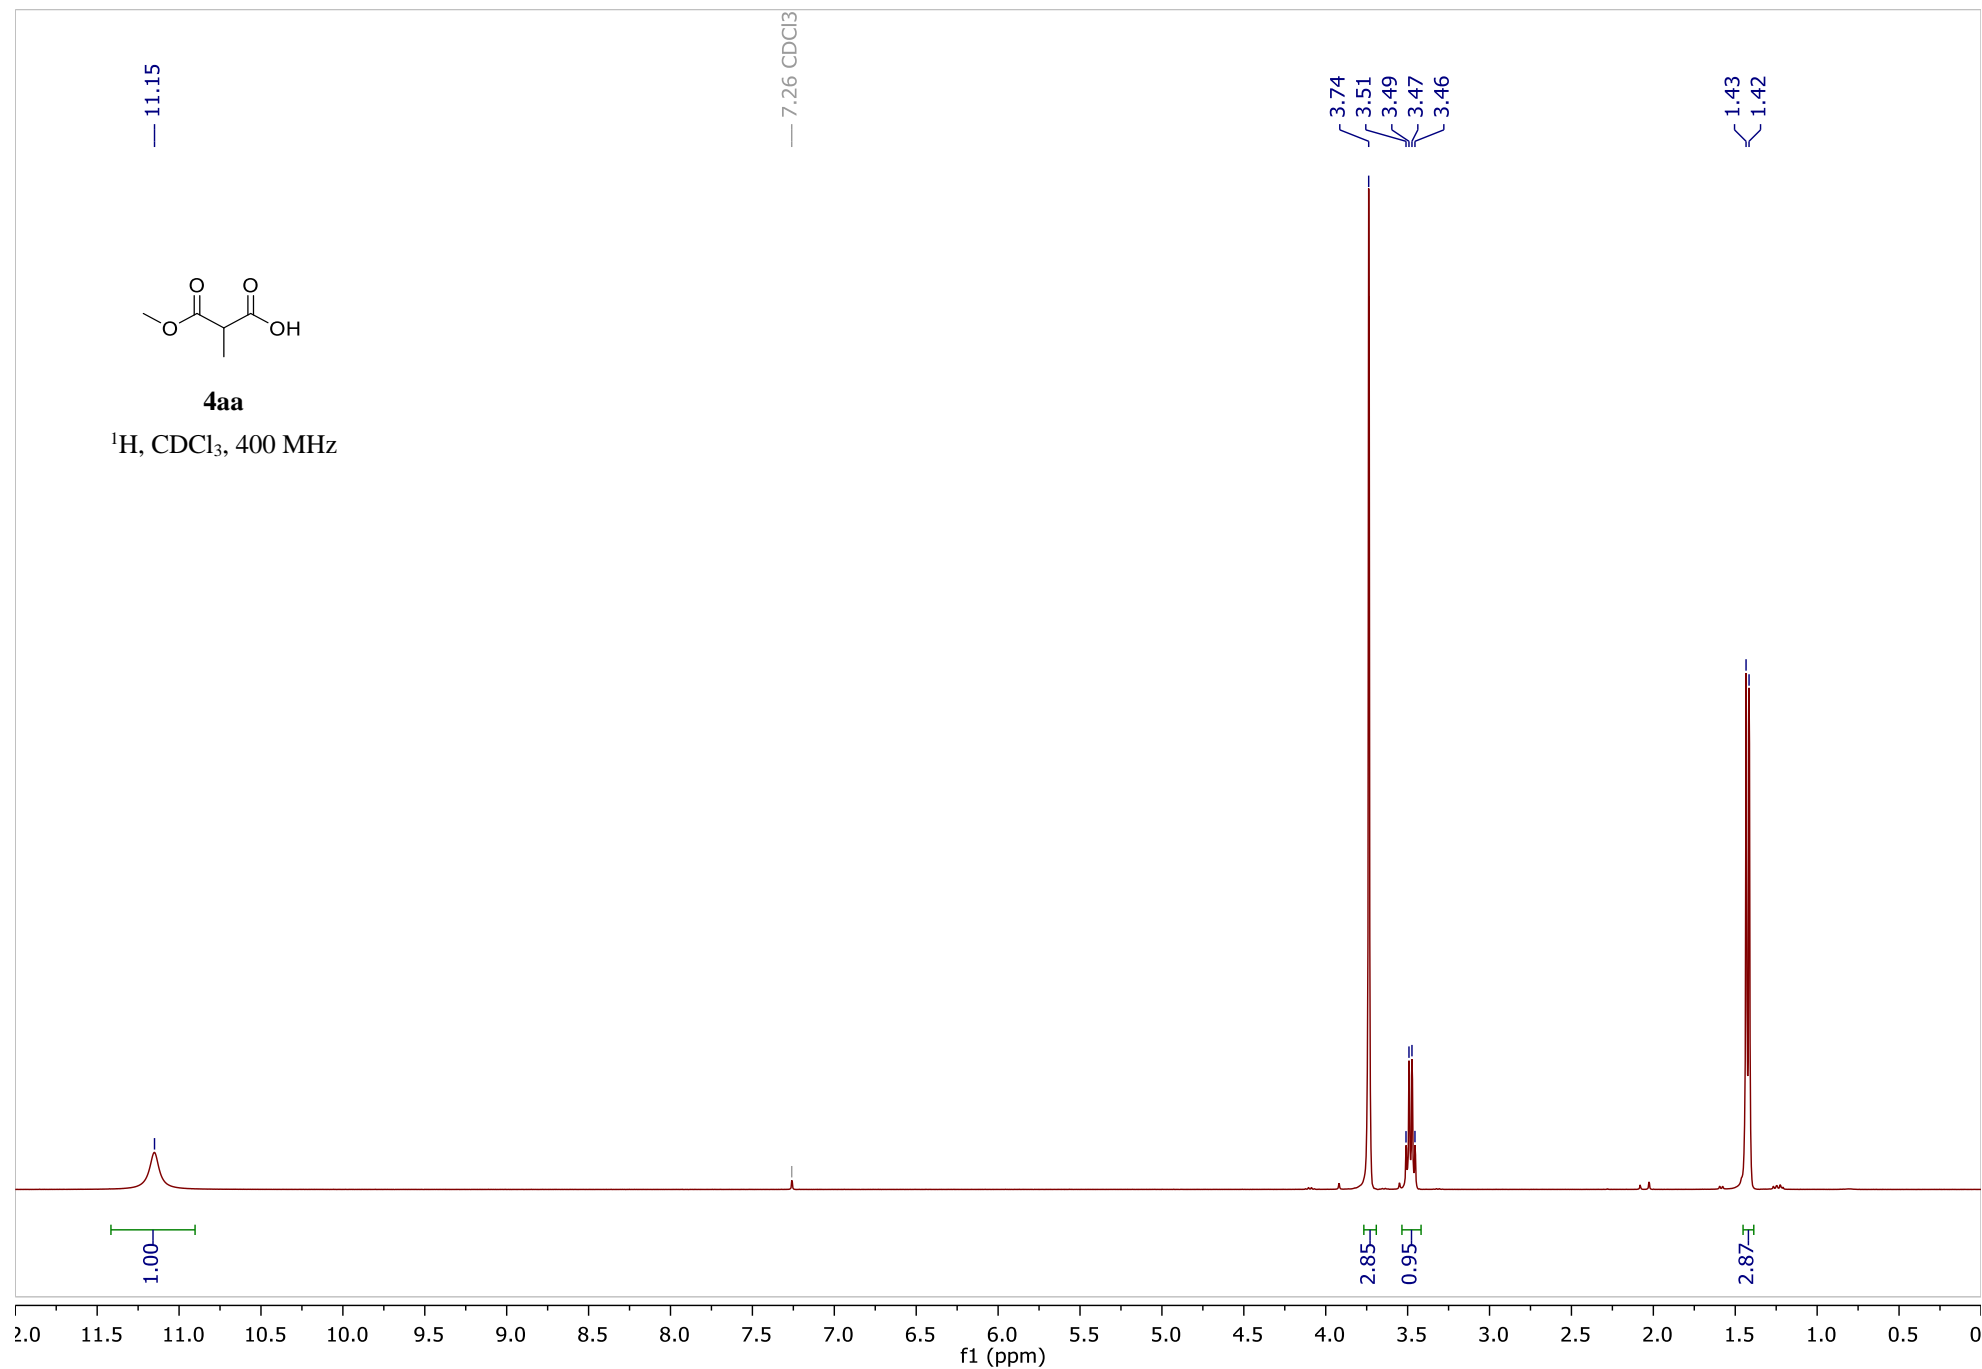

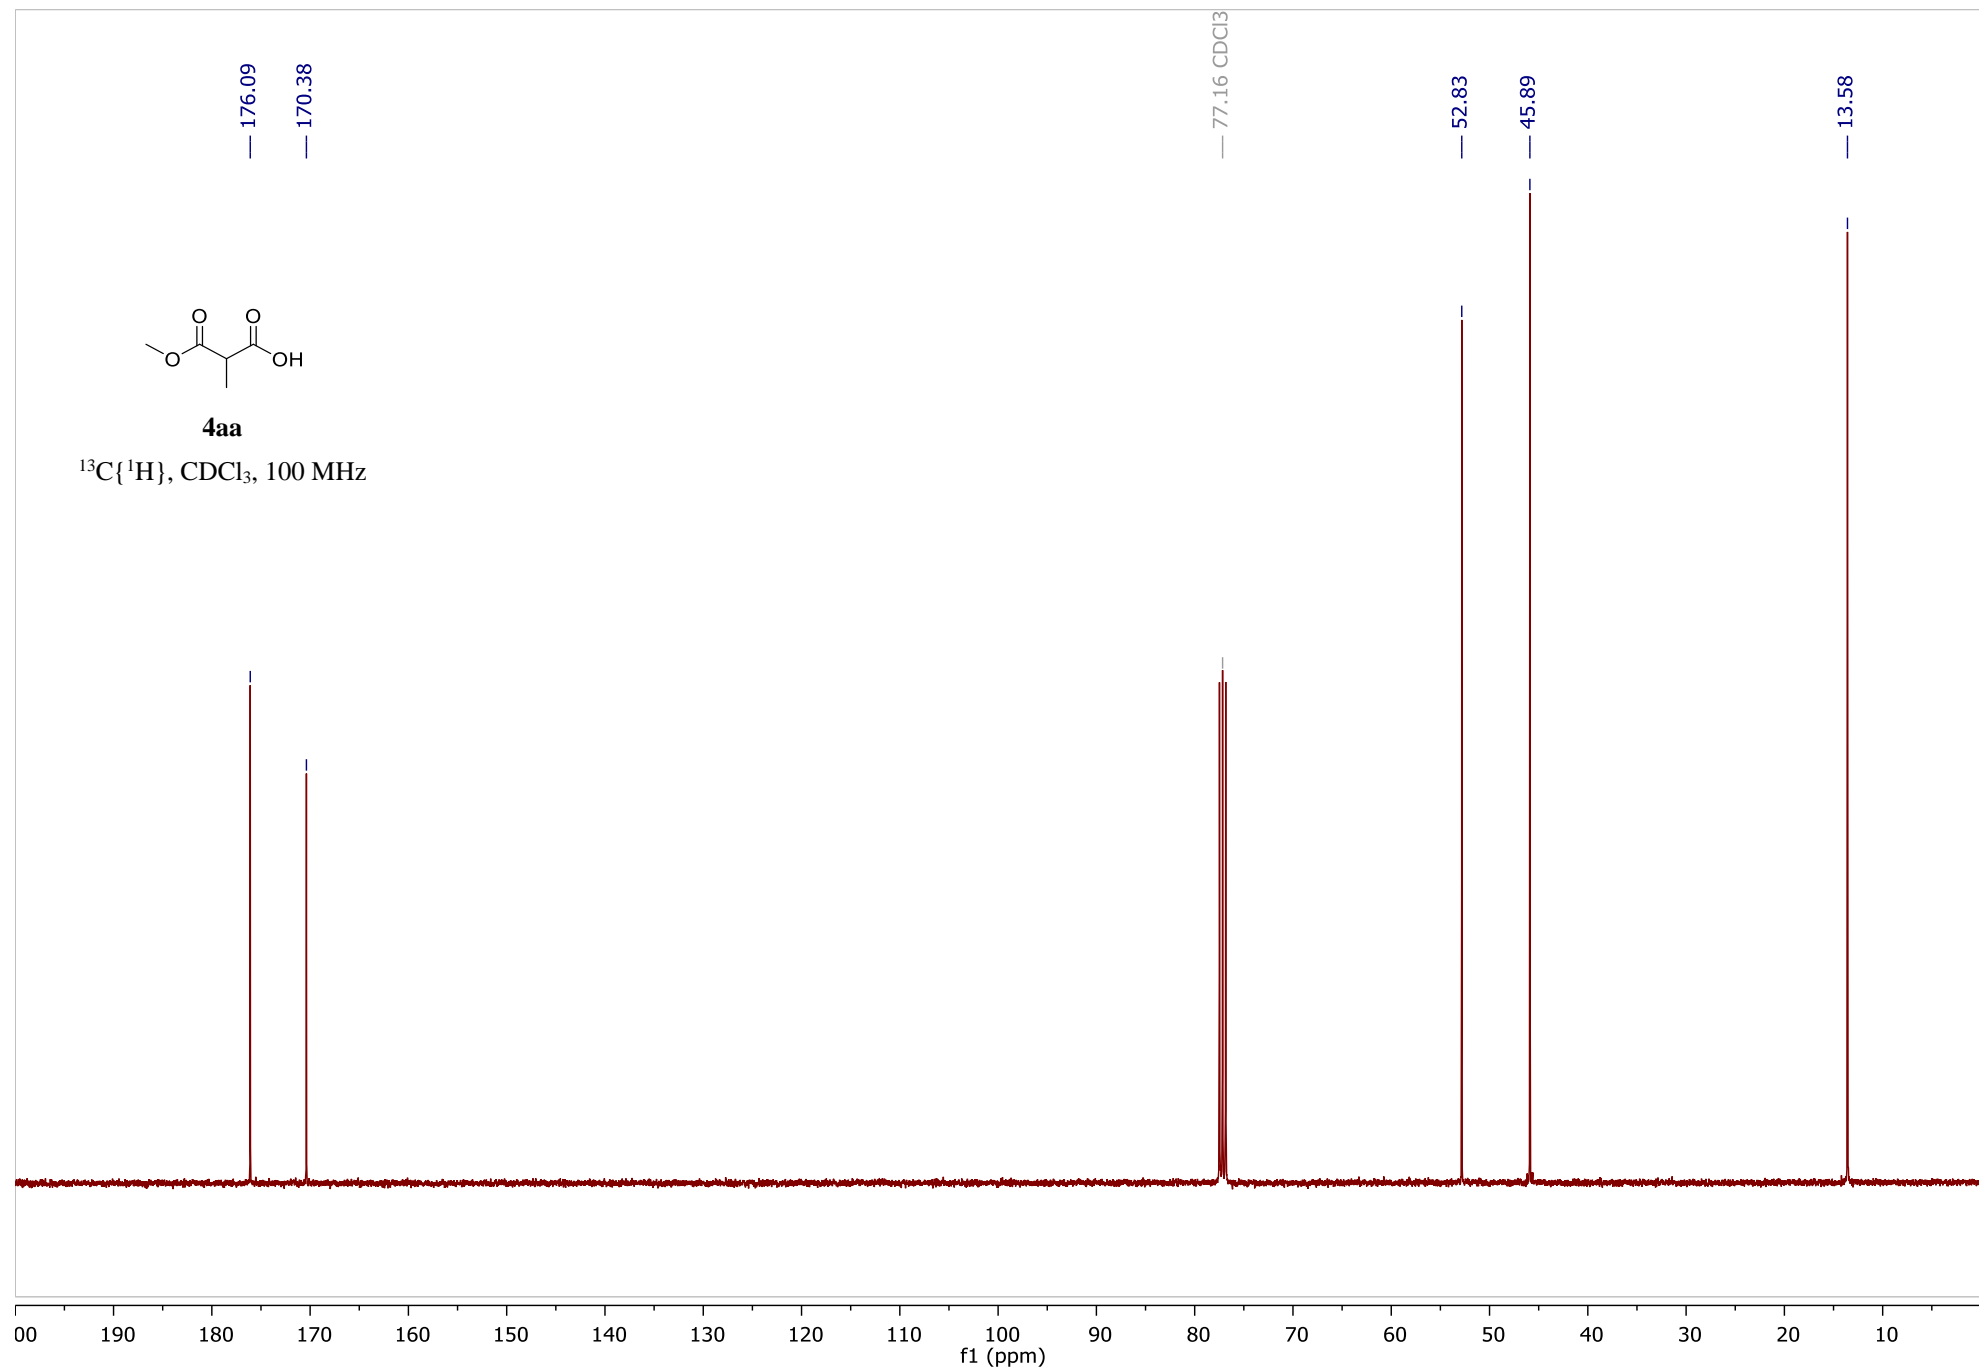

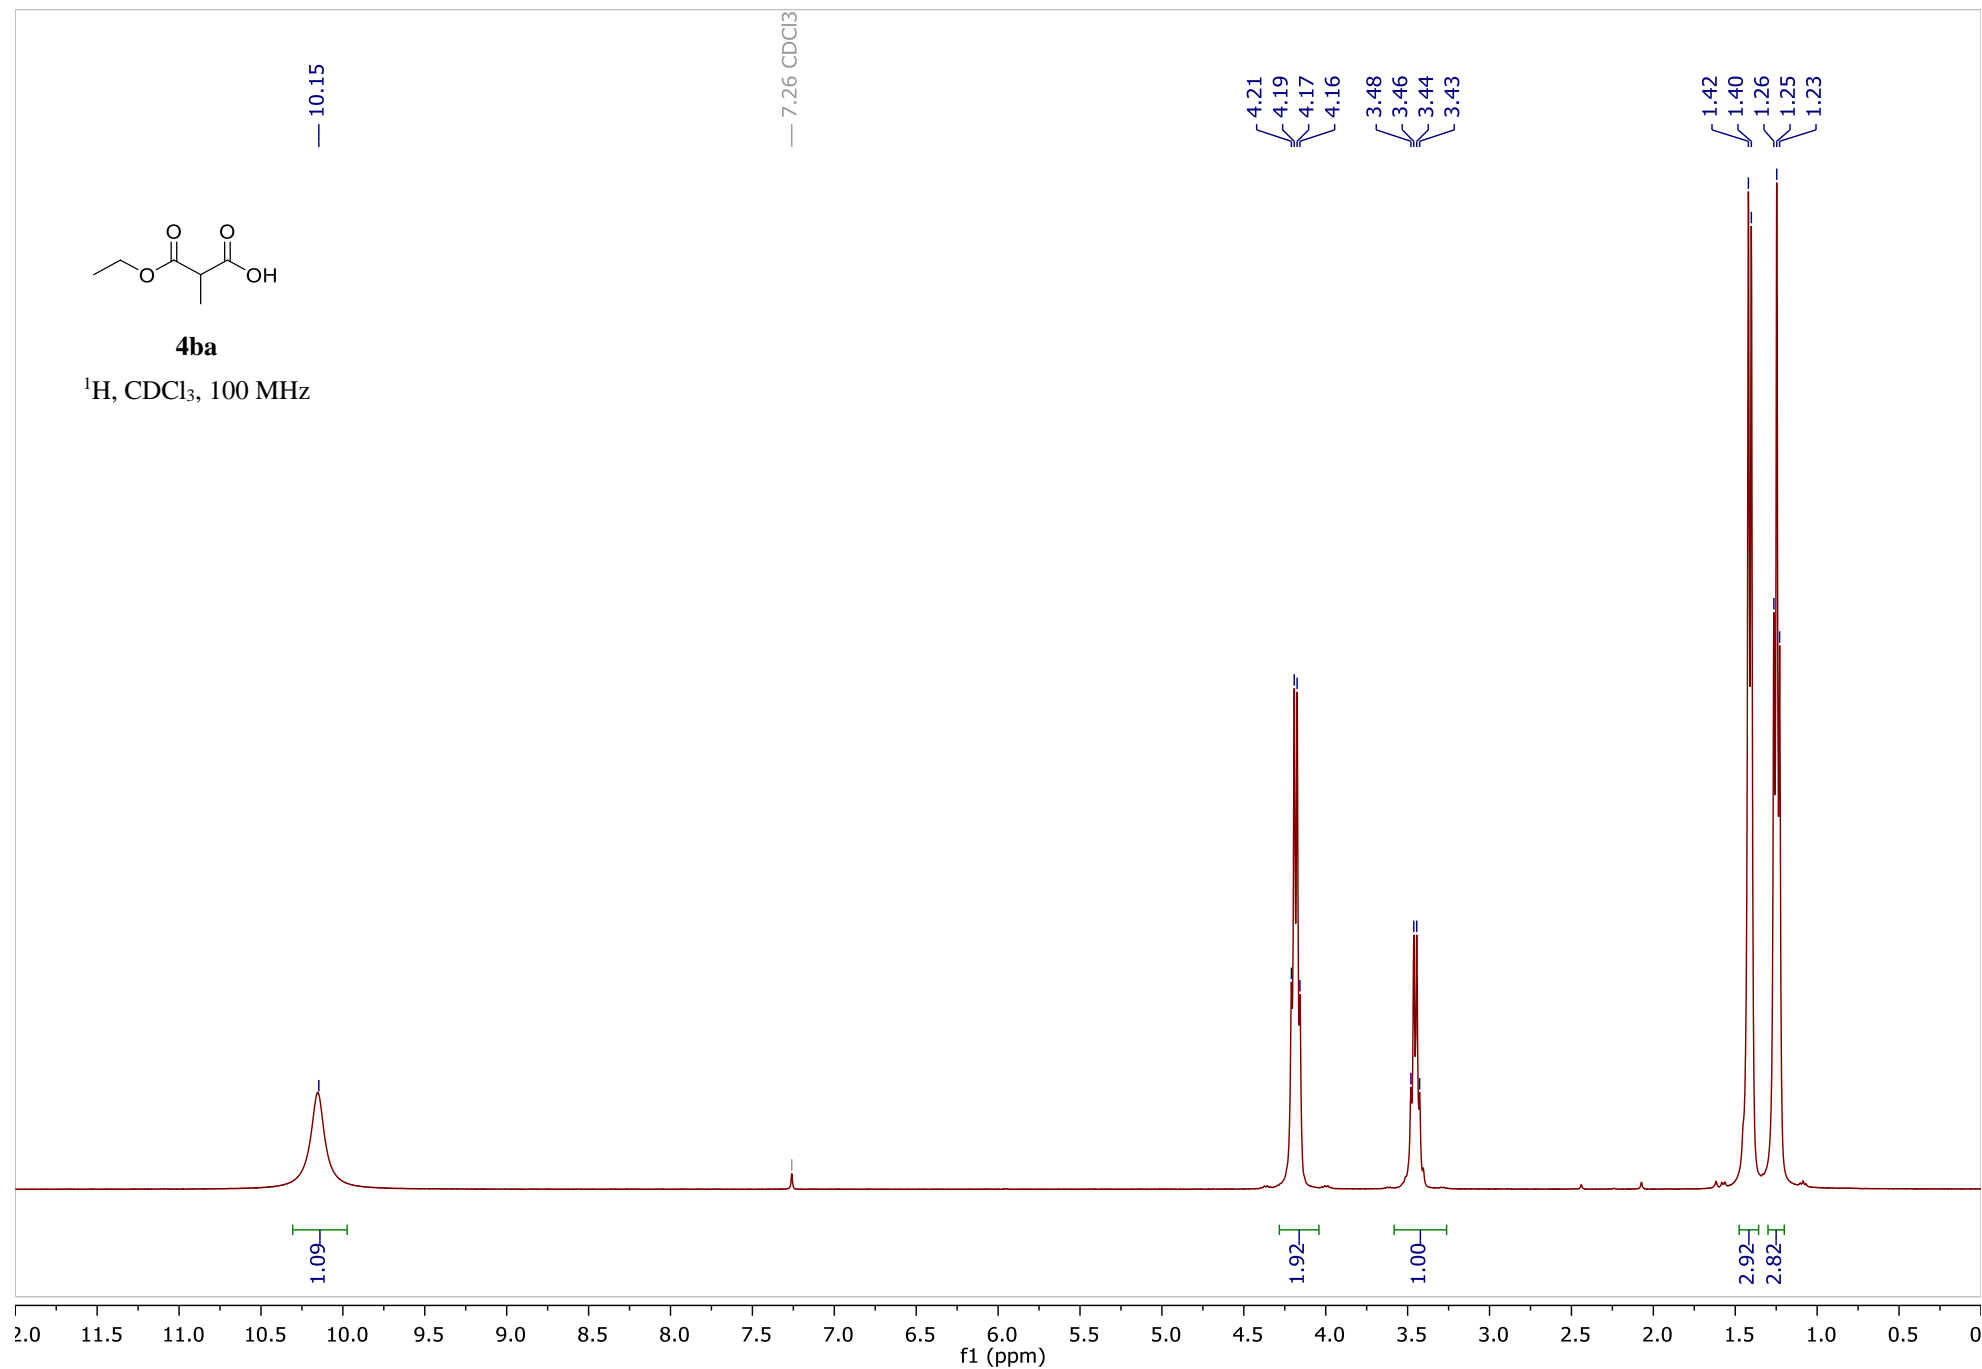

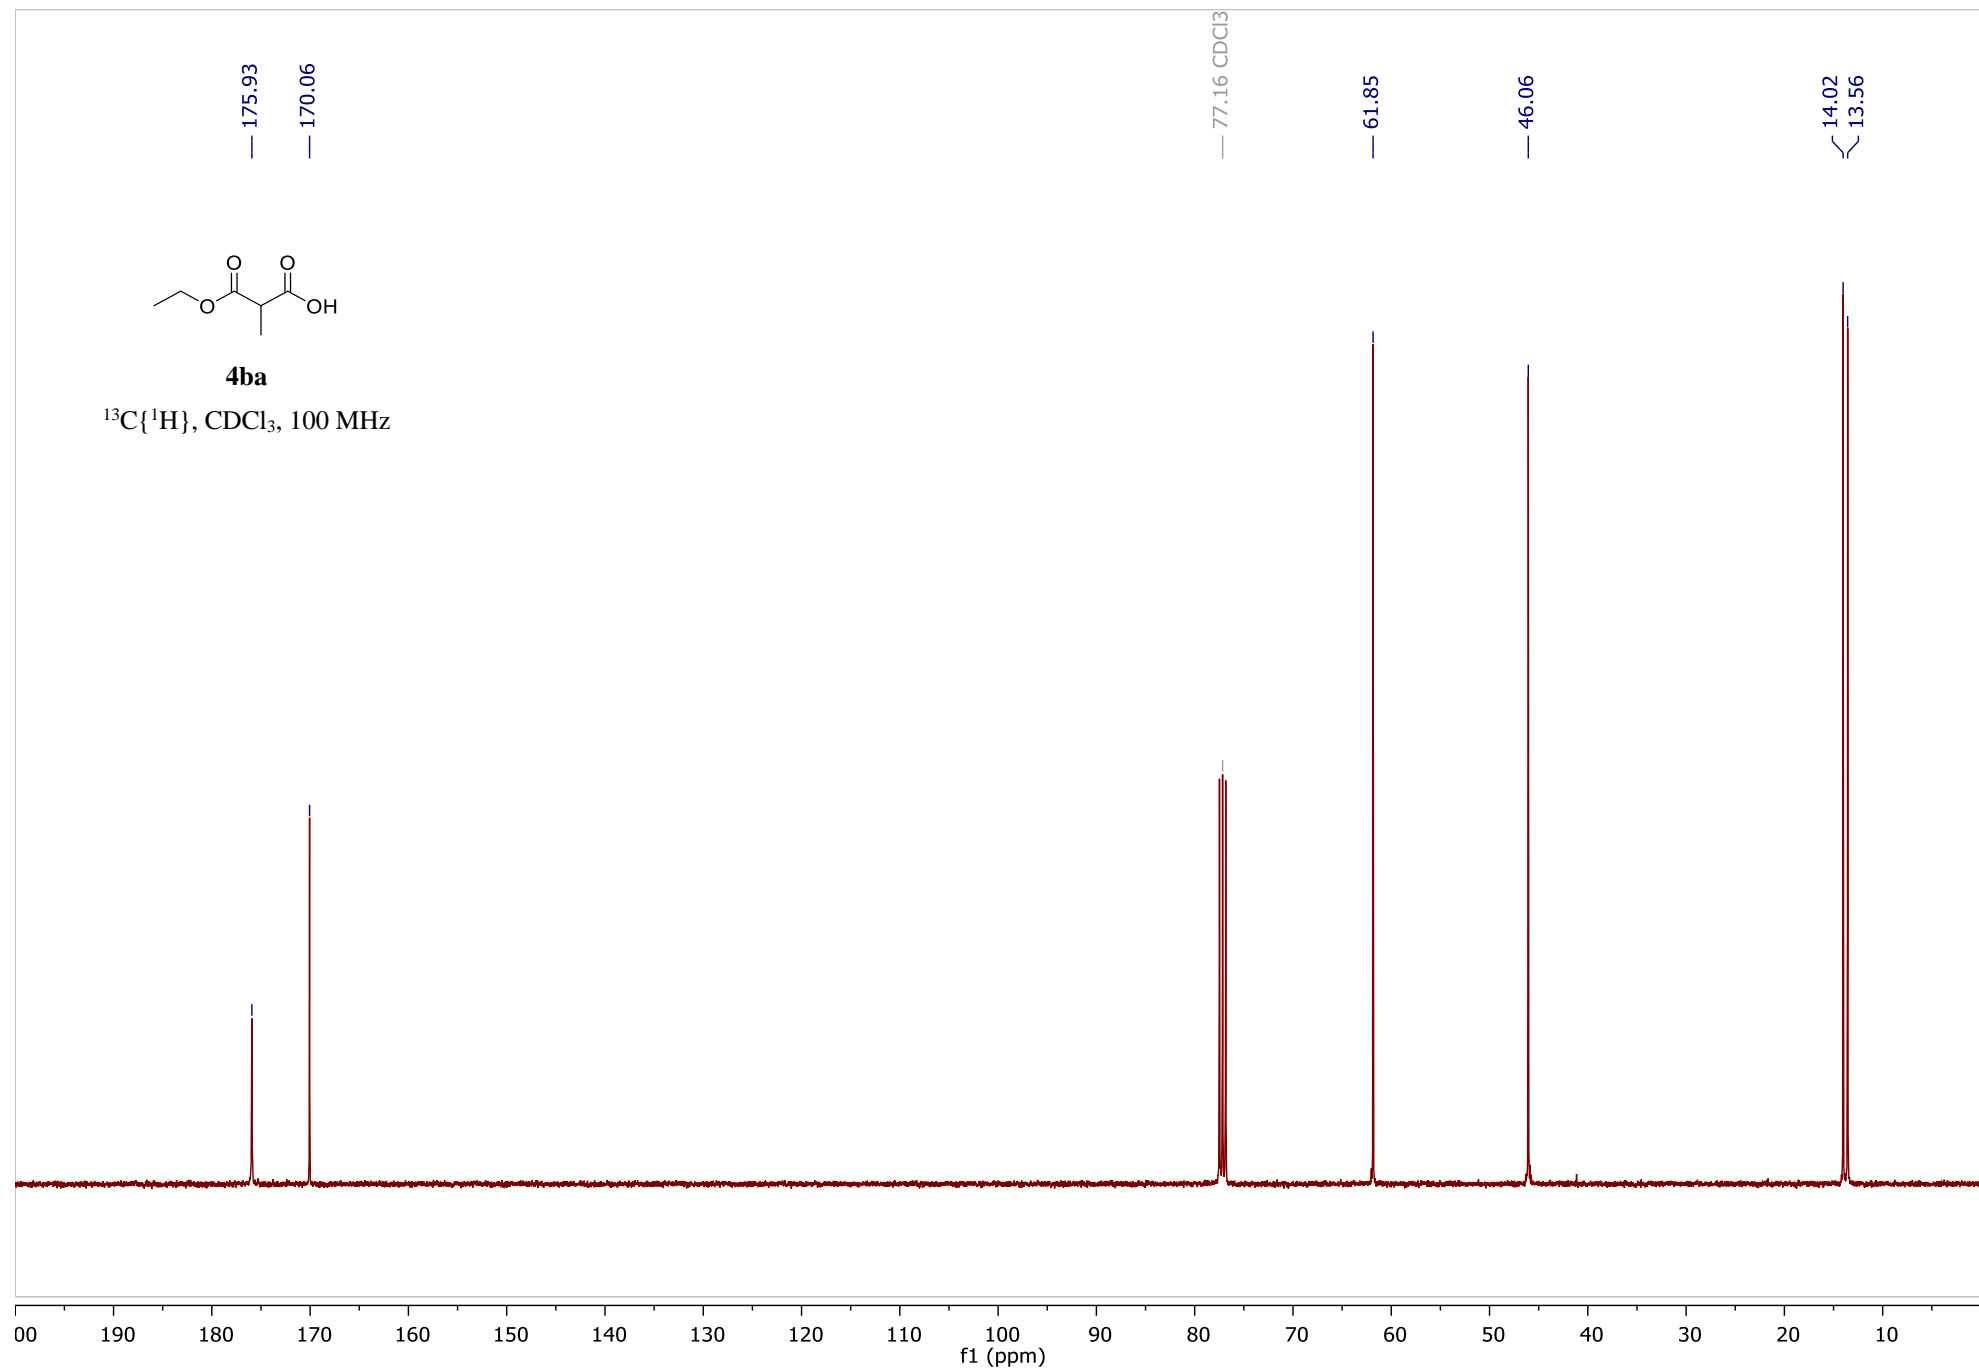

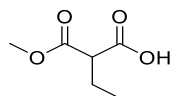

**4ab**

$^1\text{H}$ ,  $\text{CDCl}_3$ , 100 MHz

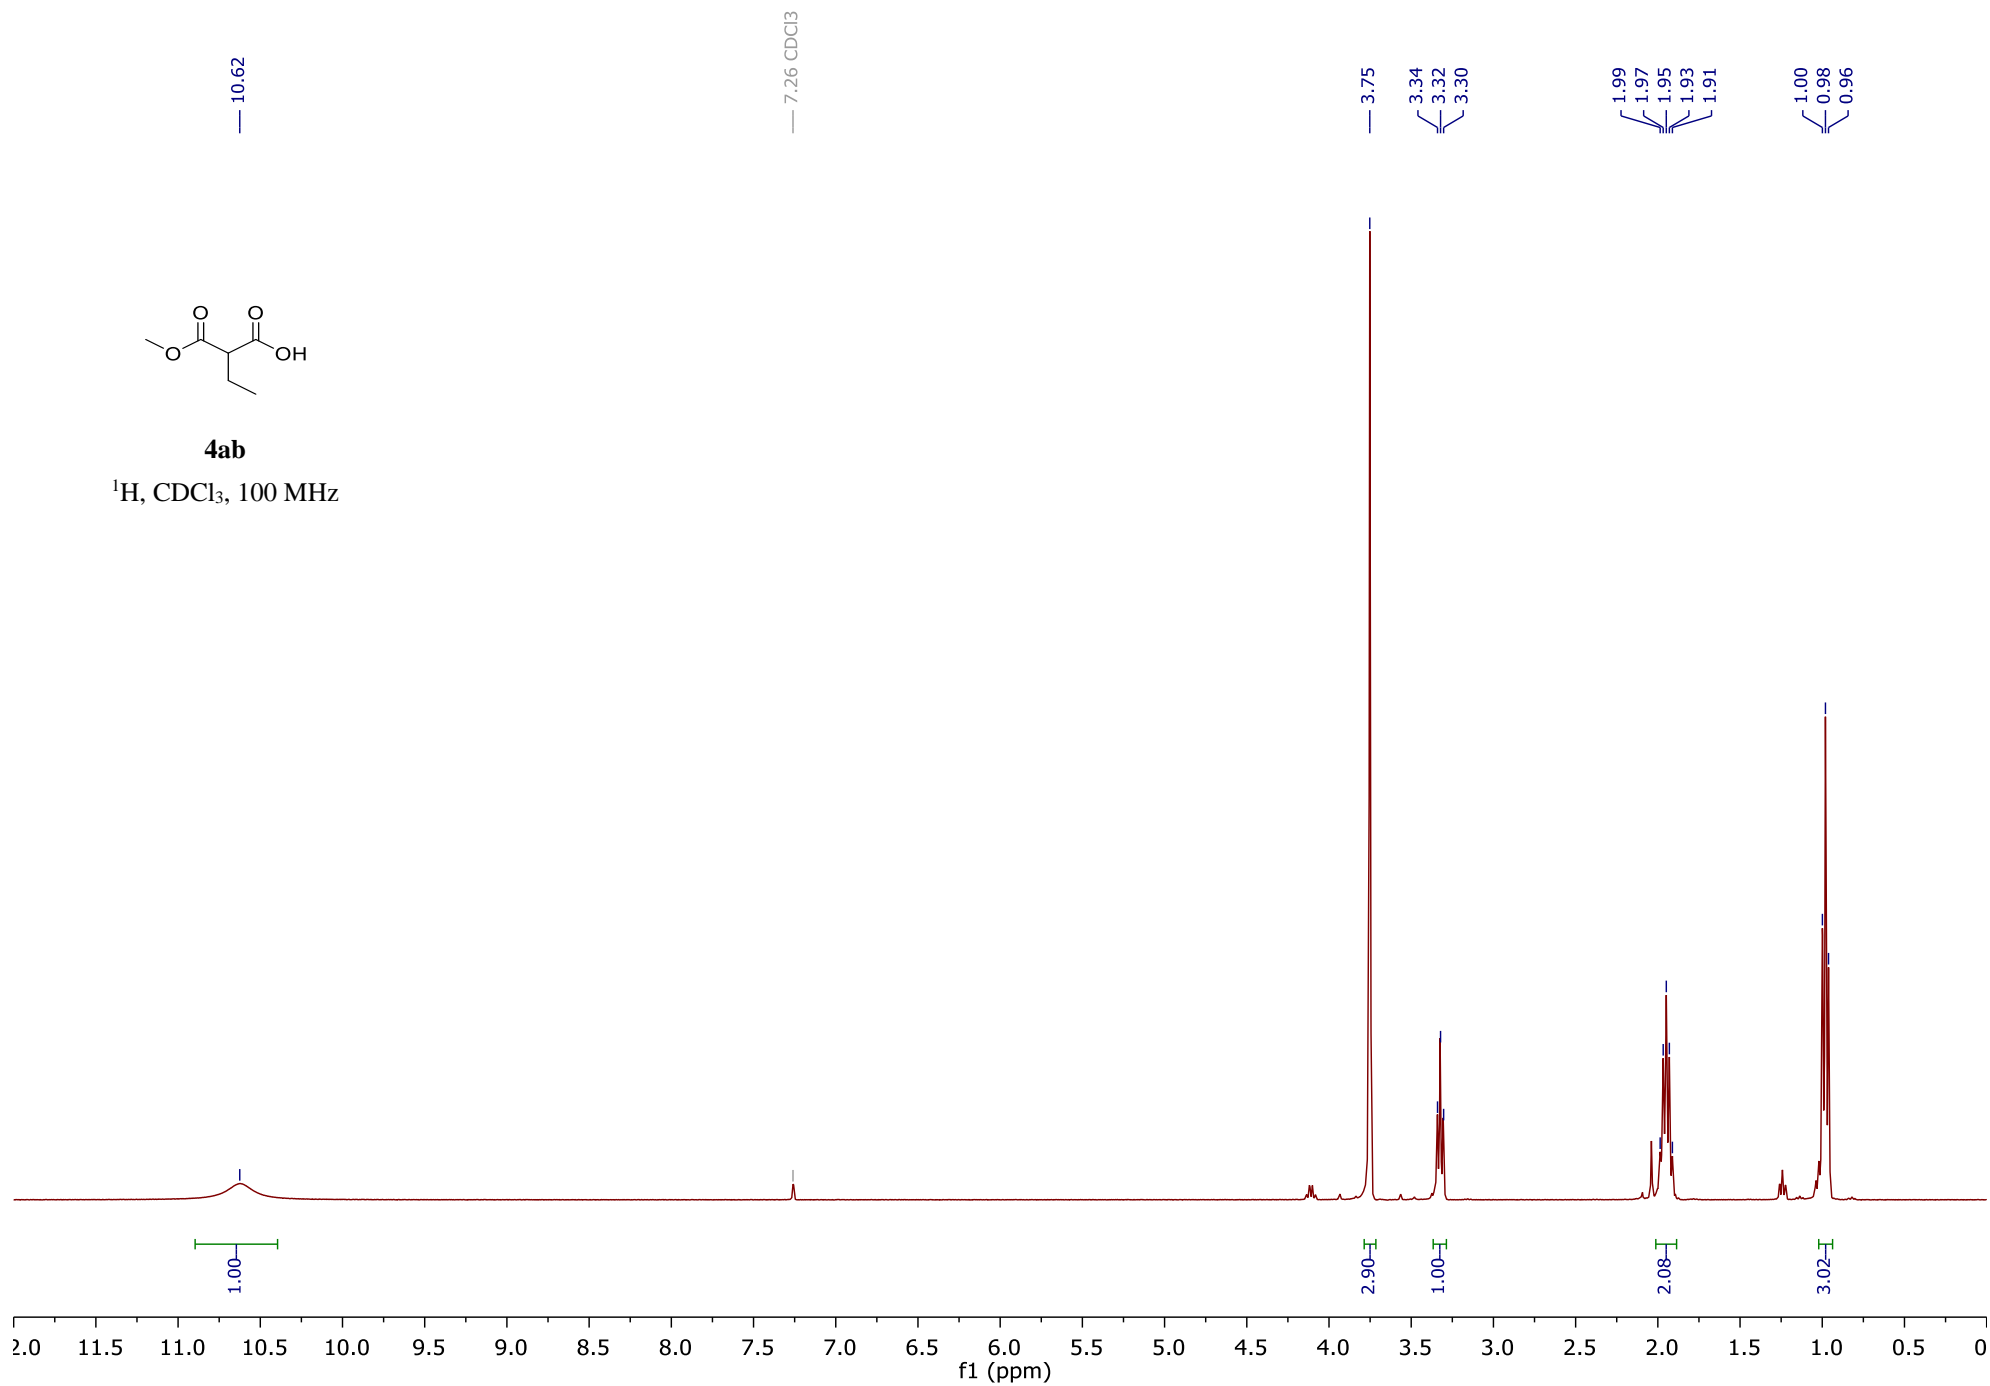

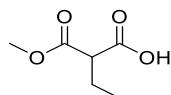

**4ab**

$^{13}\text{C}\{^1\text{H}\}$ ,  $\text{CDCl}_3$ , 100 MHz

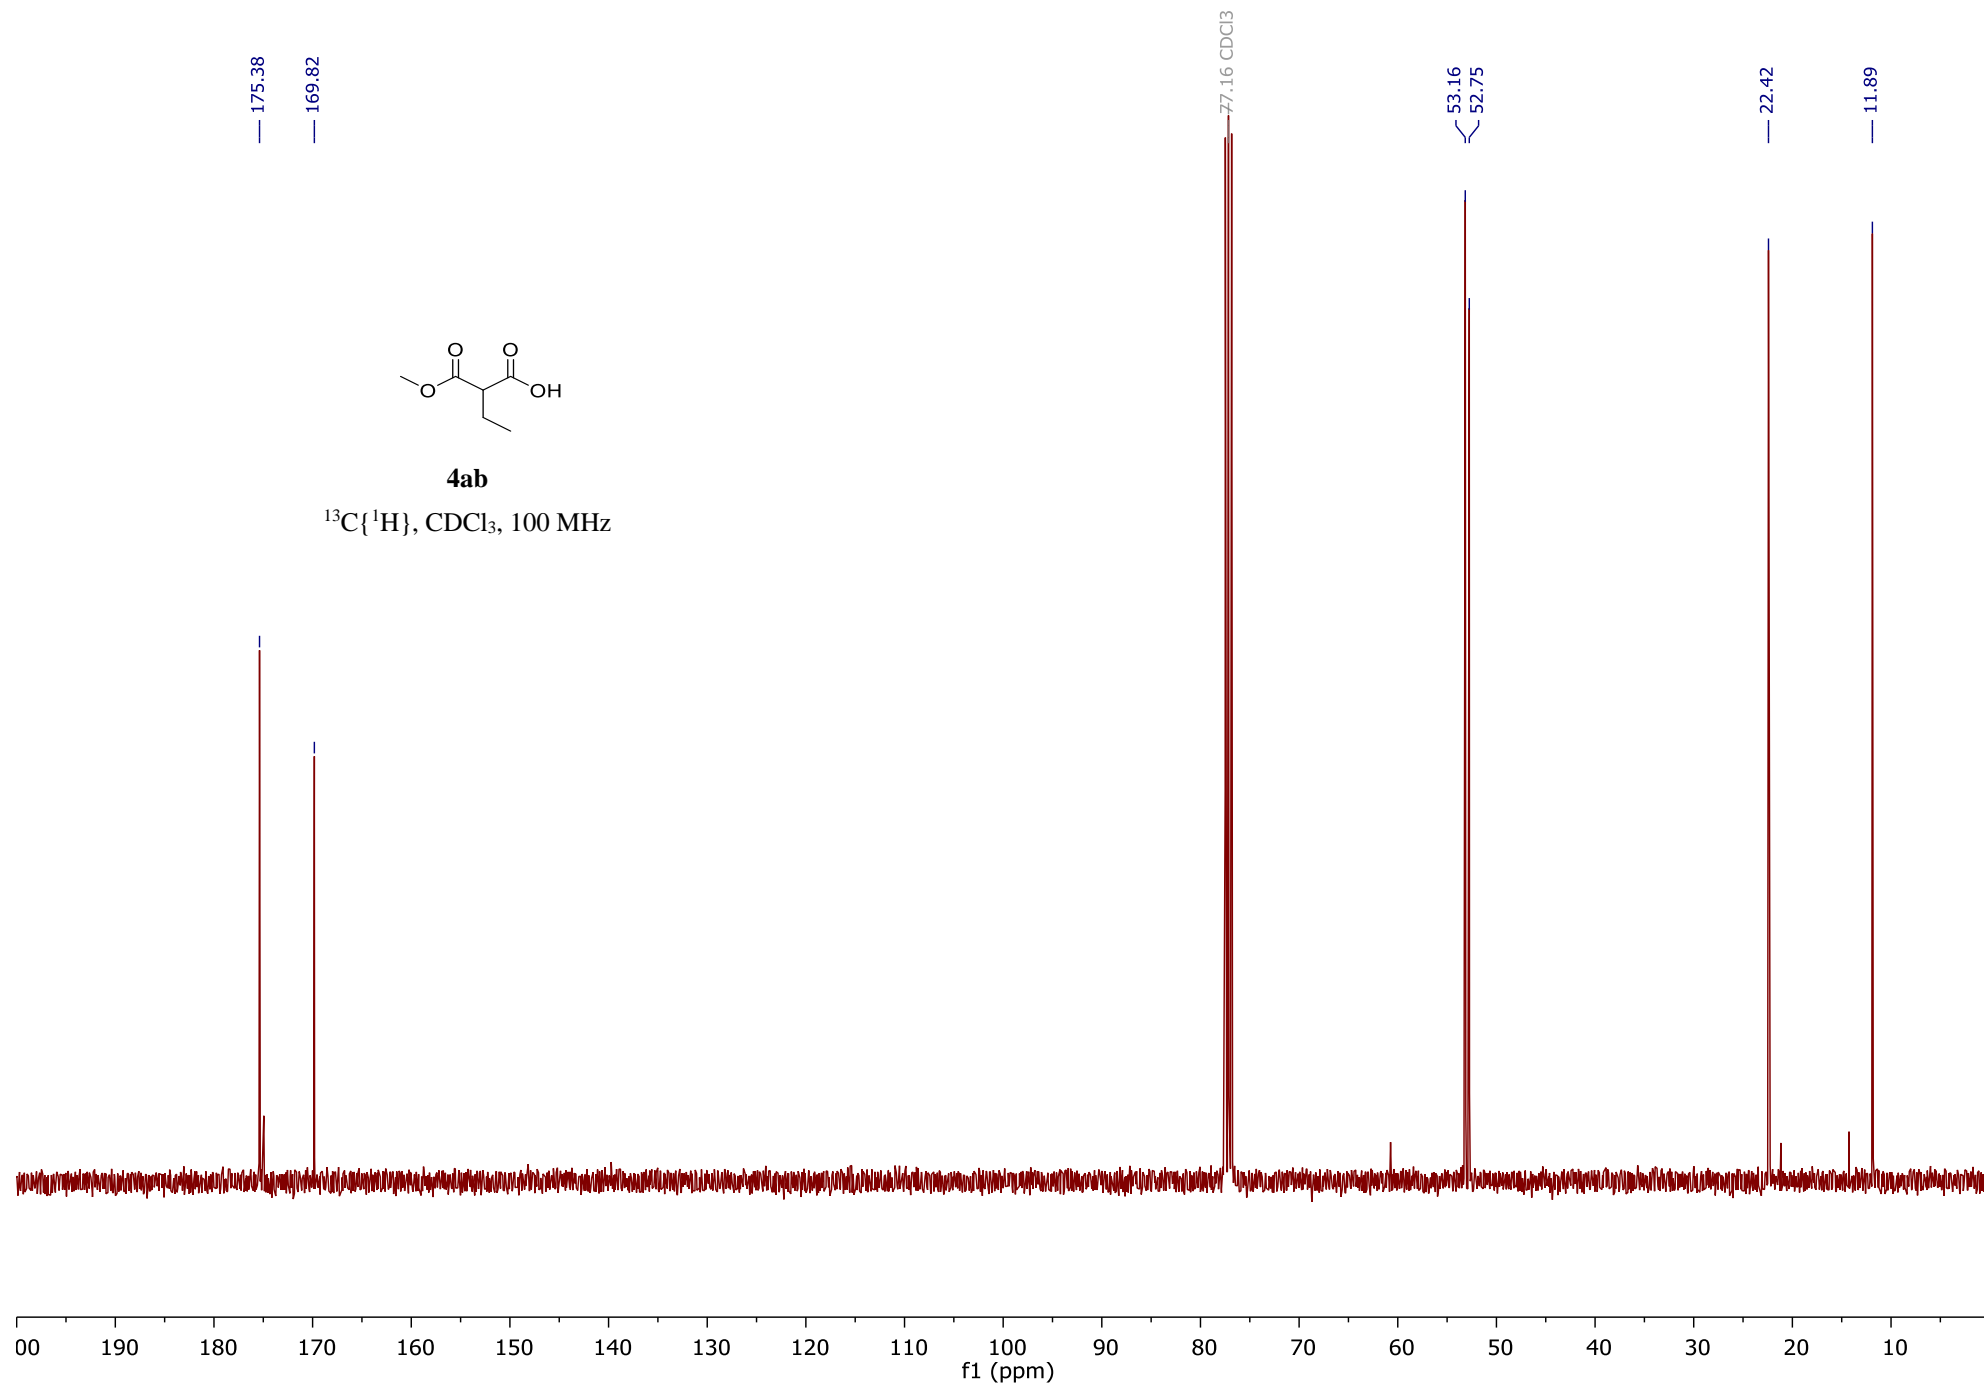

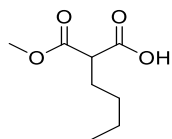

**4ac**

$^1\text{H}$ ,  $\text{CDCl}_3$ , 400 MHz

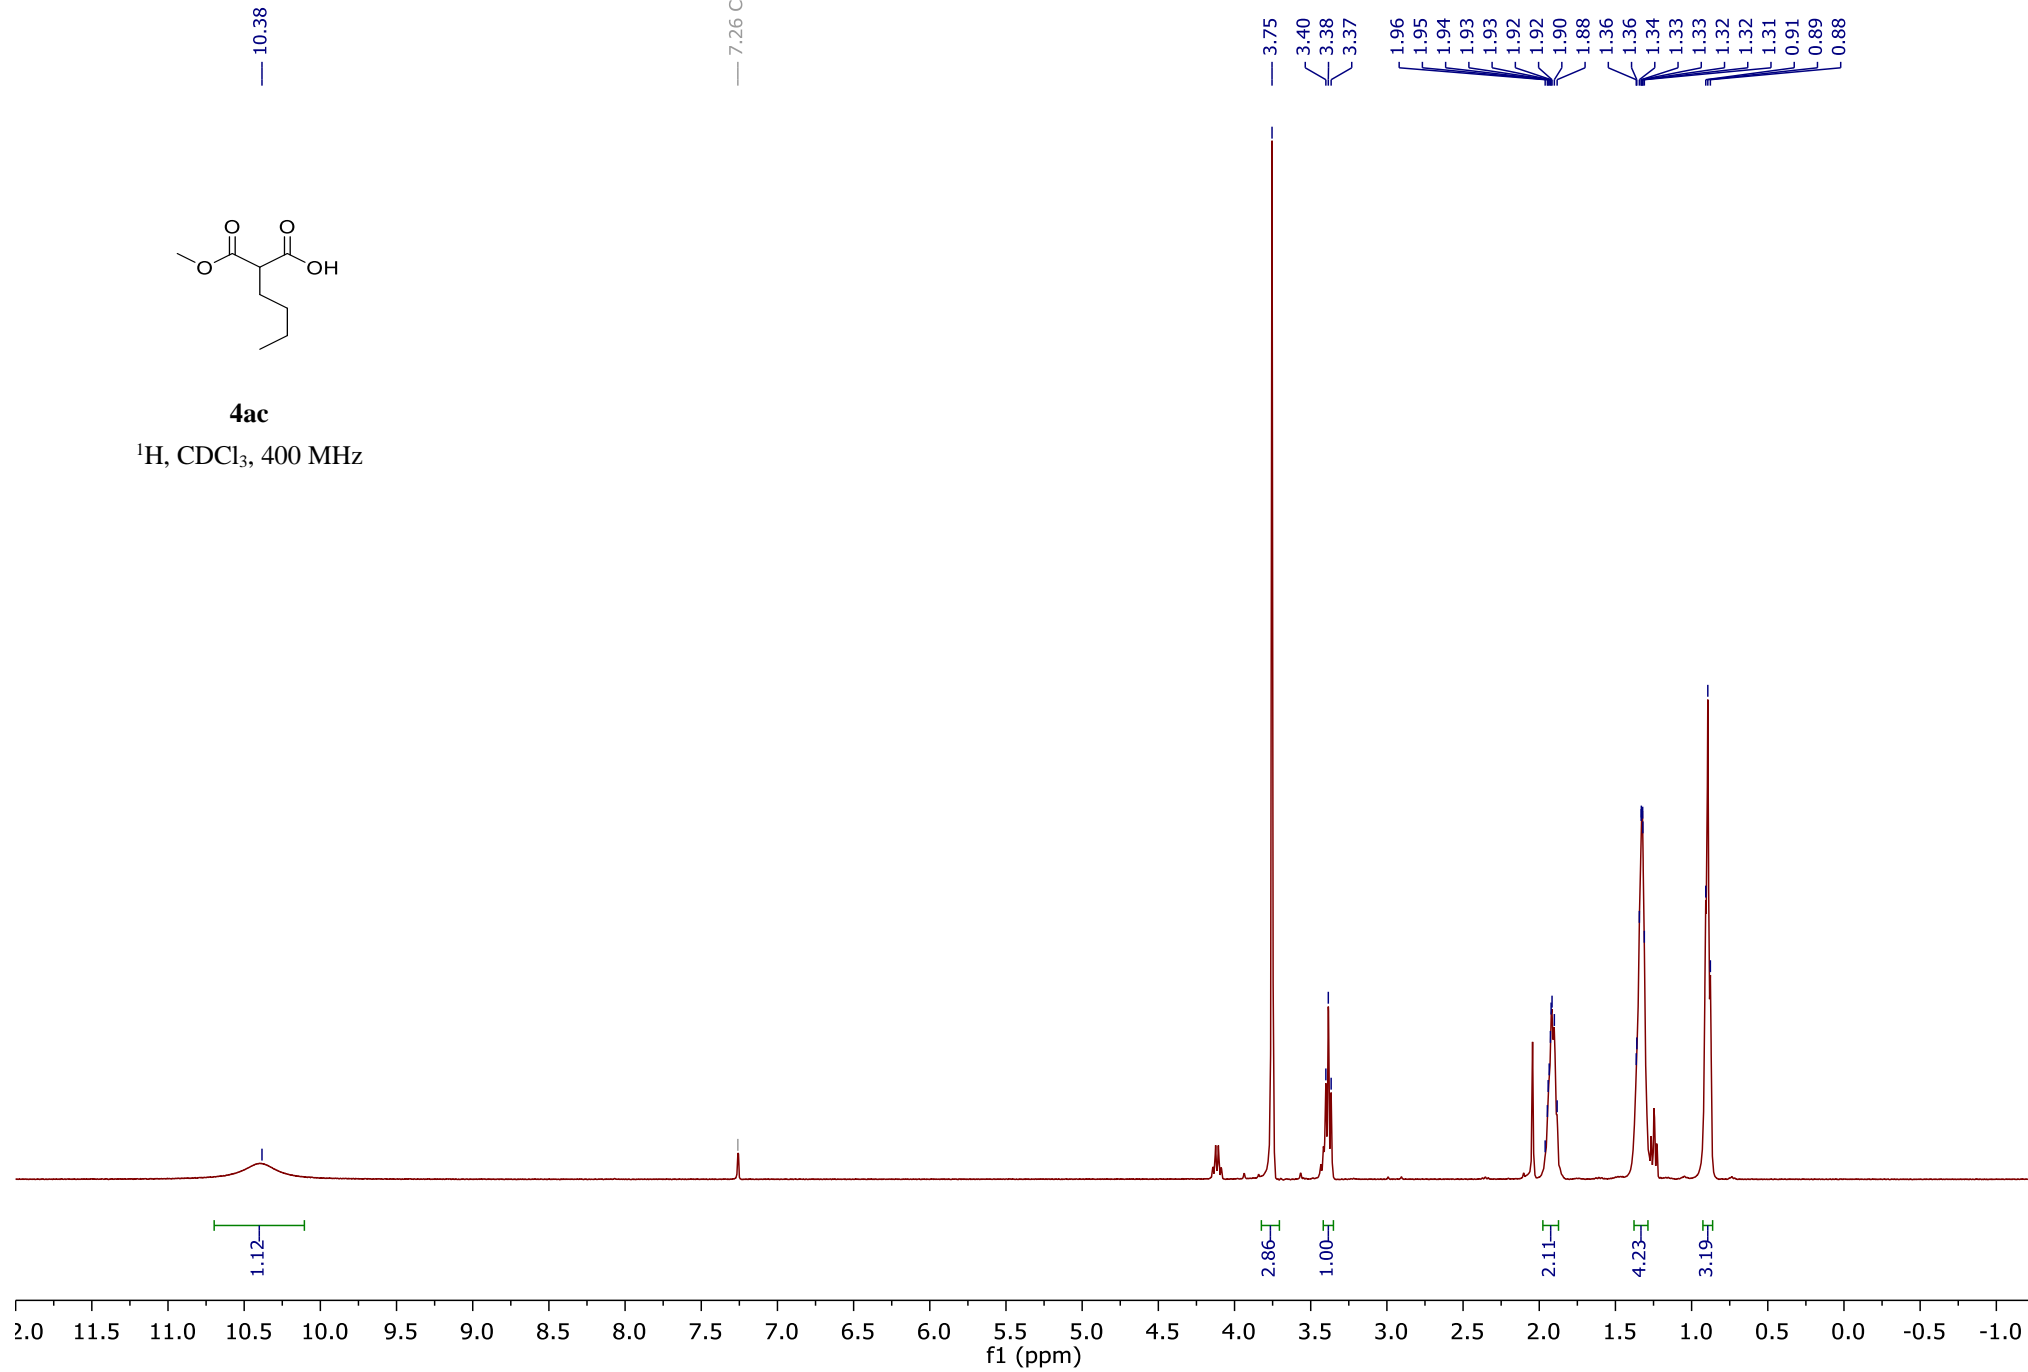



— 175.54  
— 169.96

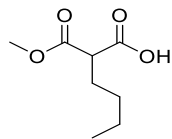

**4ac**

$^{13}\text{C}\{^1\text{H}\}$ ,  $\text{CDCl}_3$ , 100 MHz

— 52.79  
— 51.70

— 29.50  
— 28.67

— 22.40

— 13.88

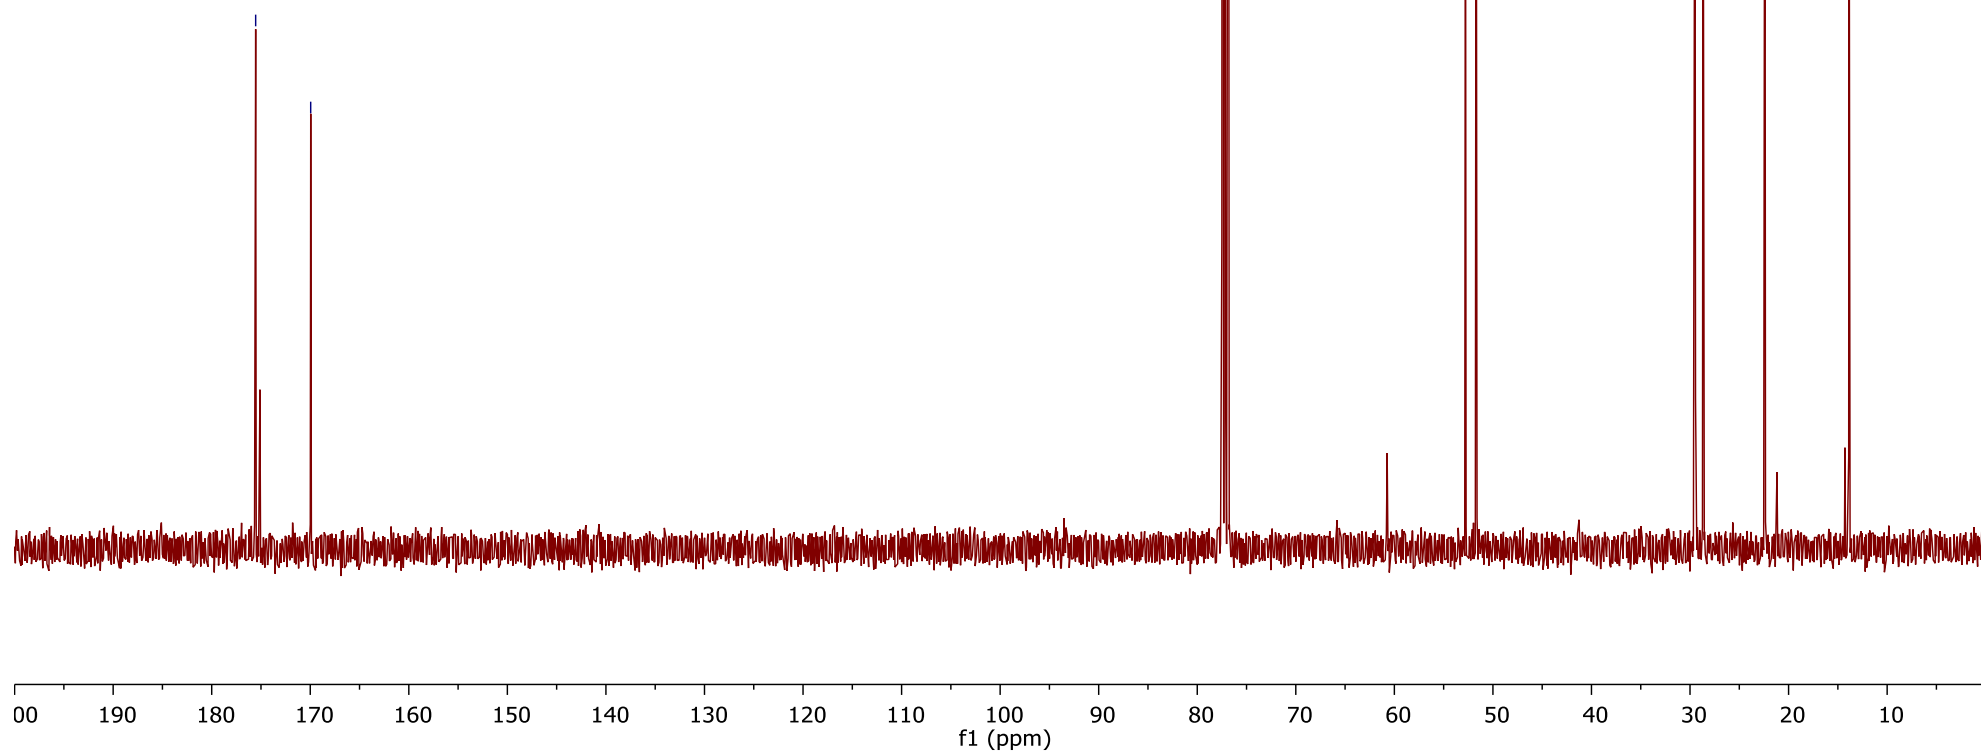

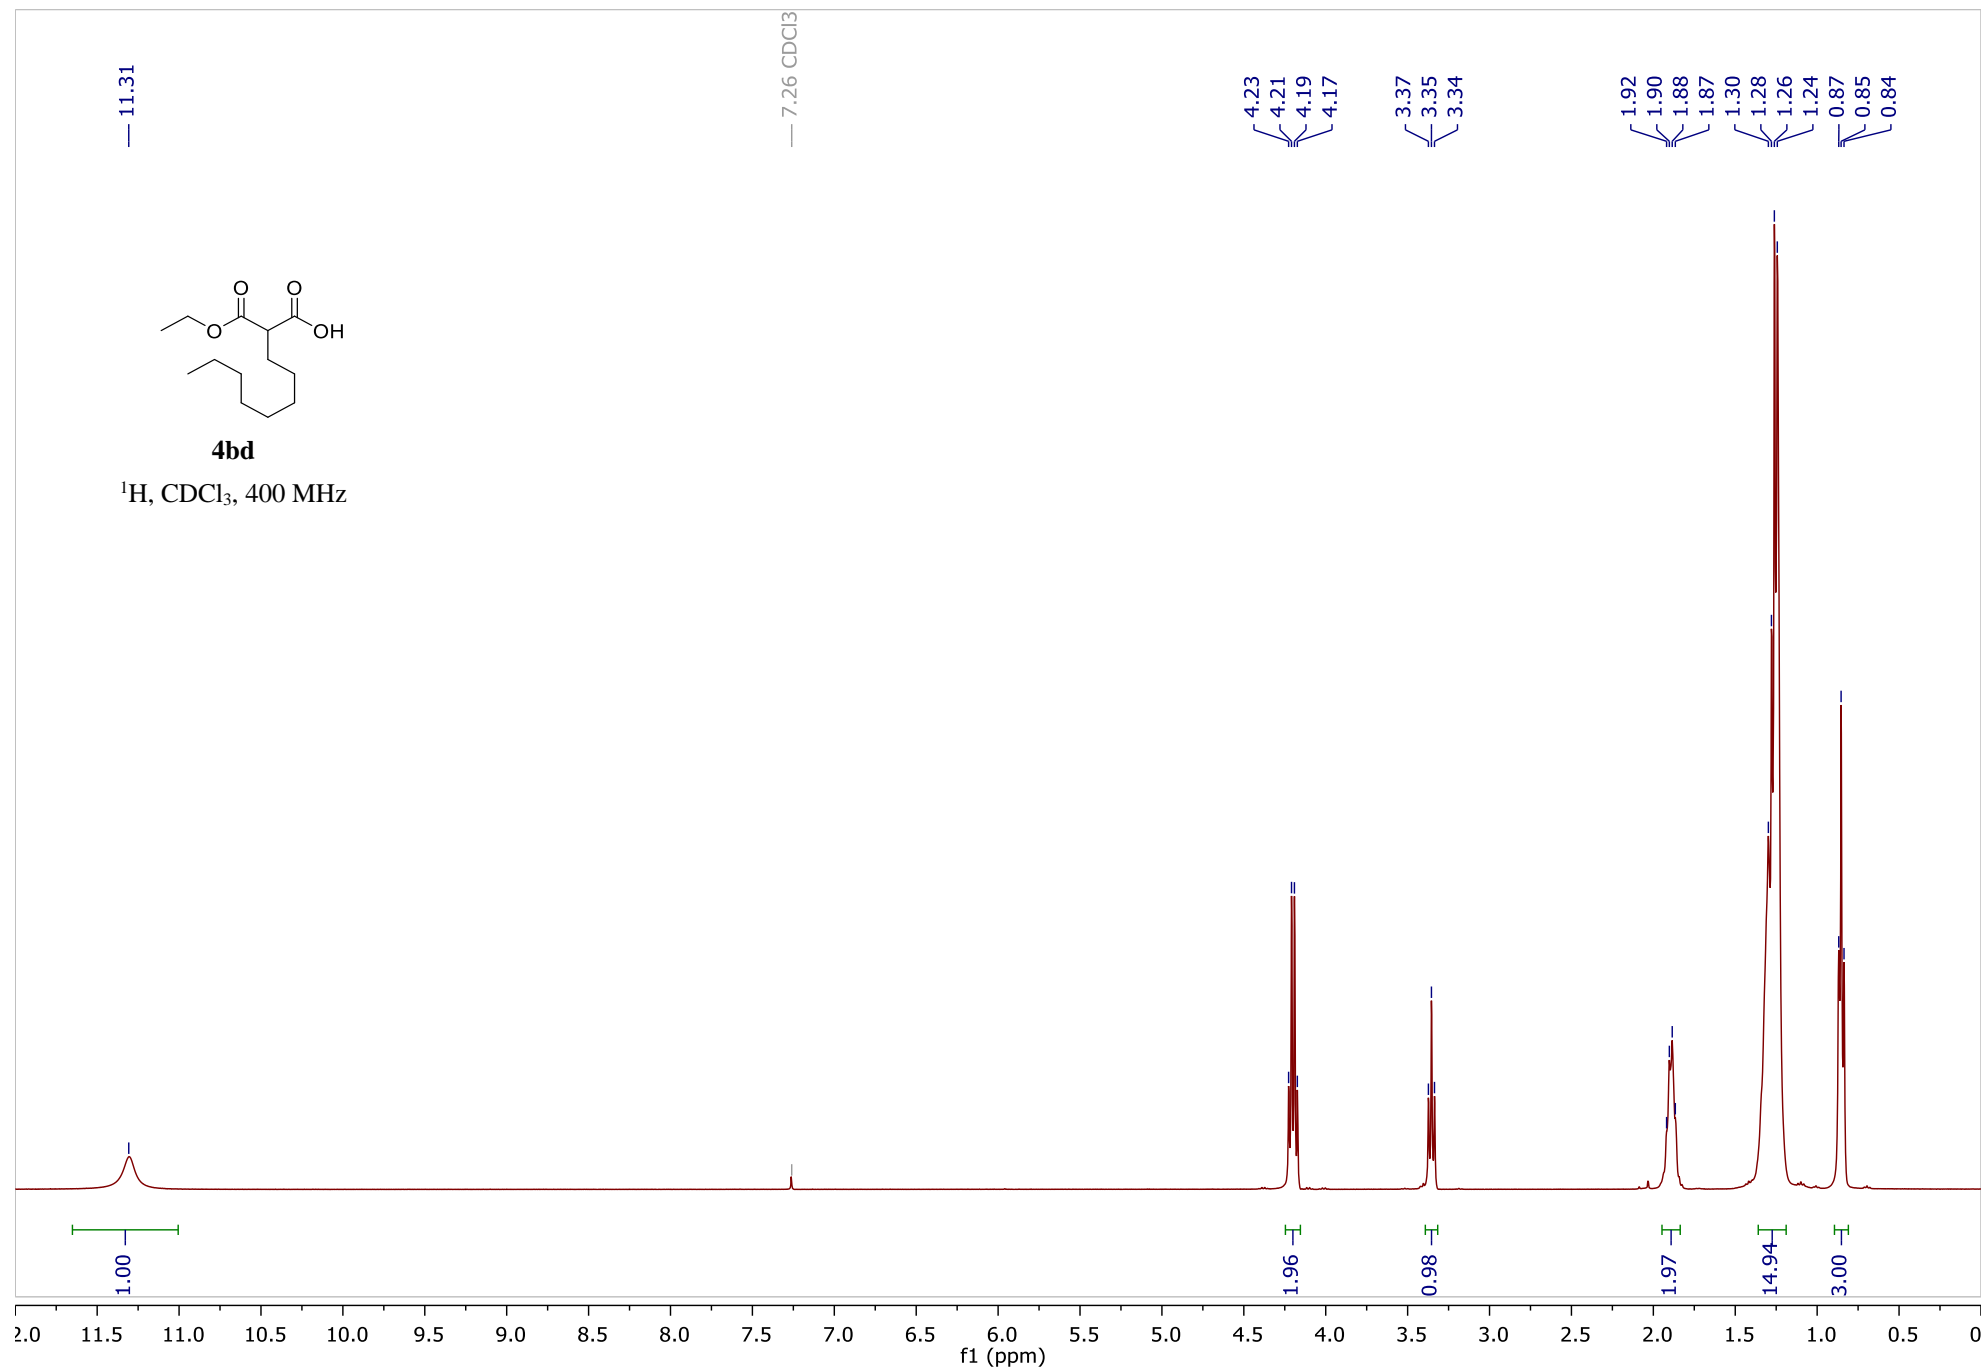

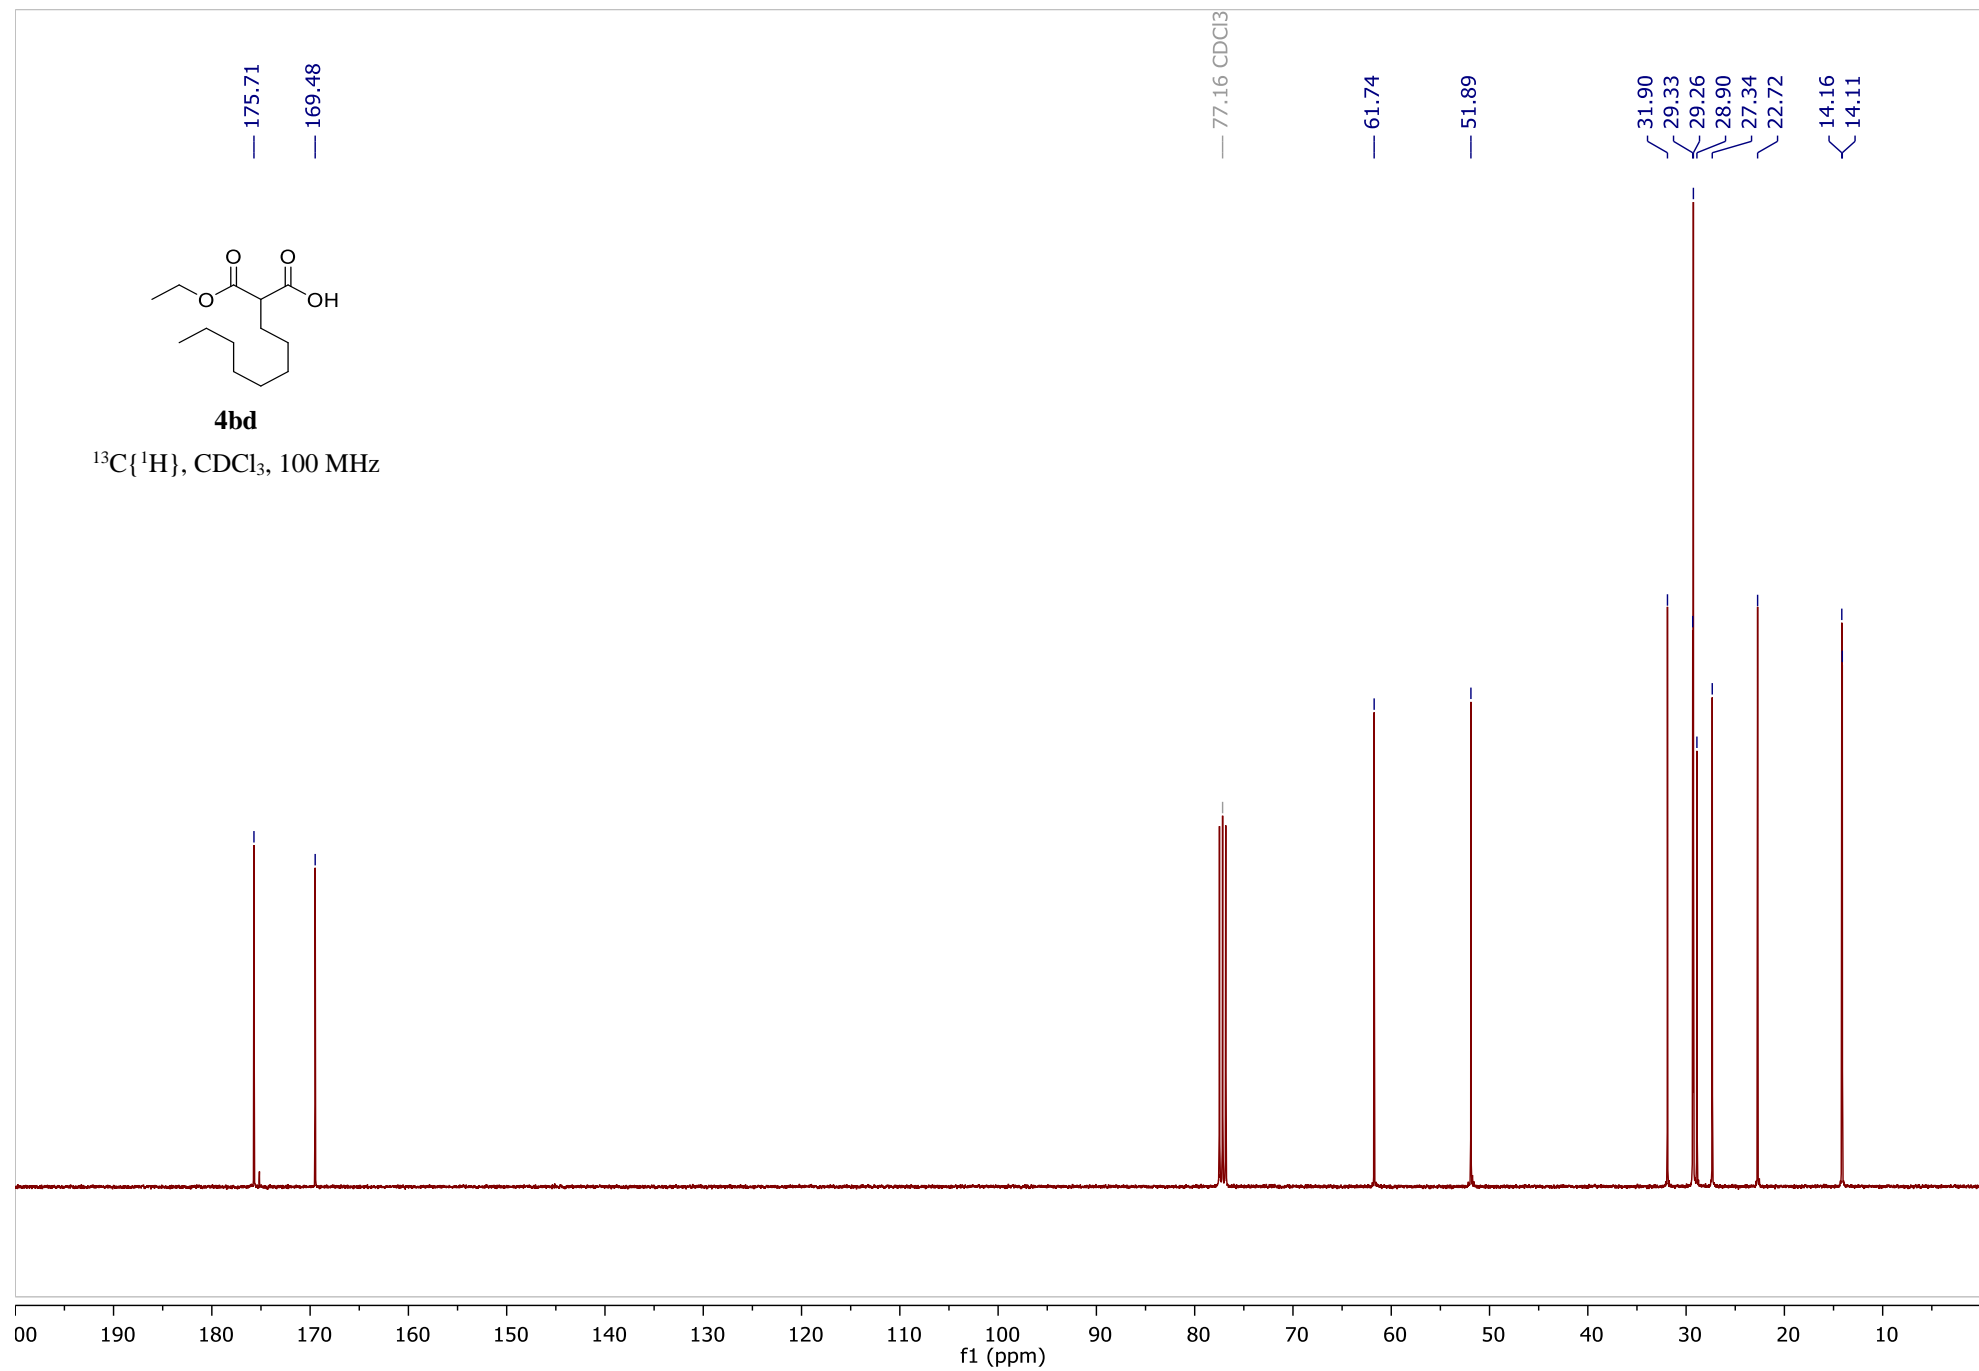

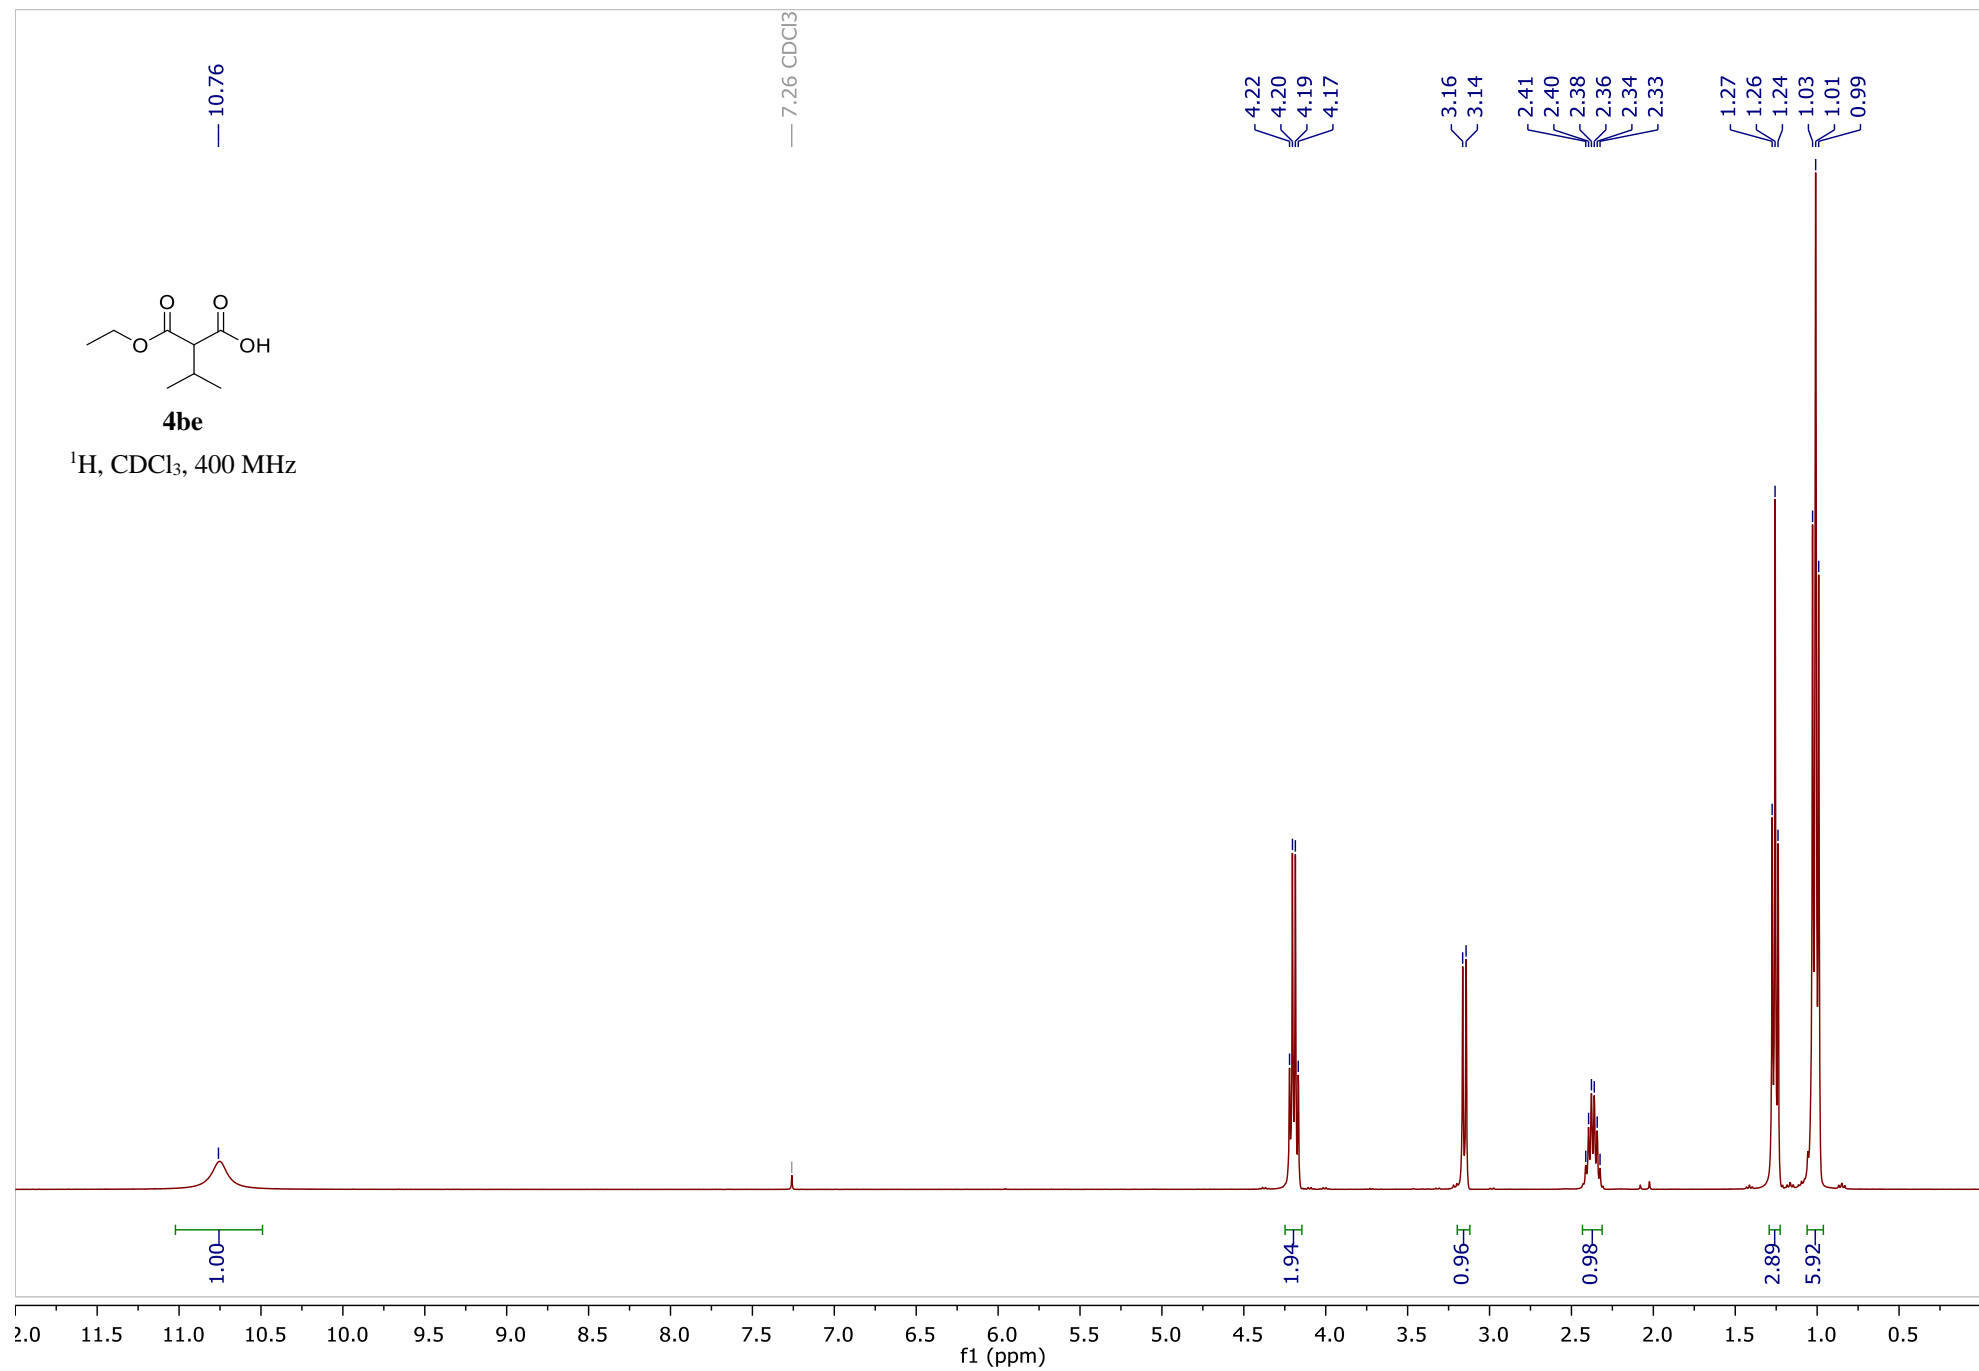

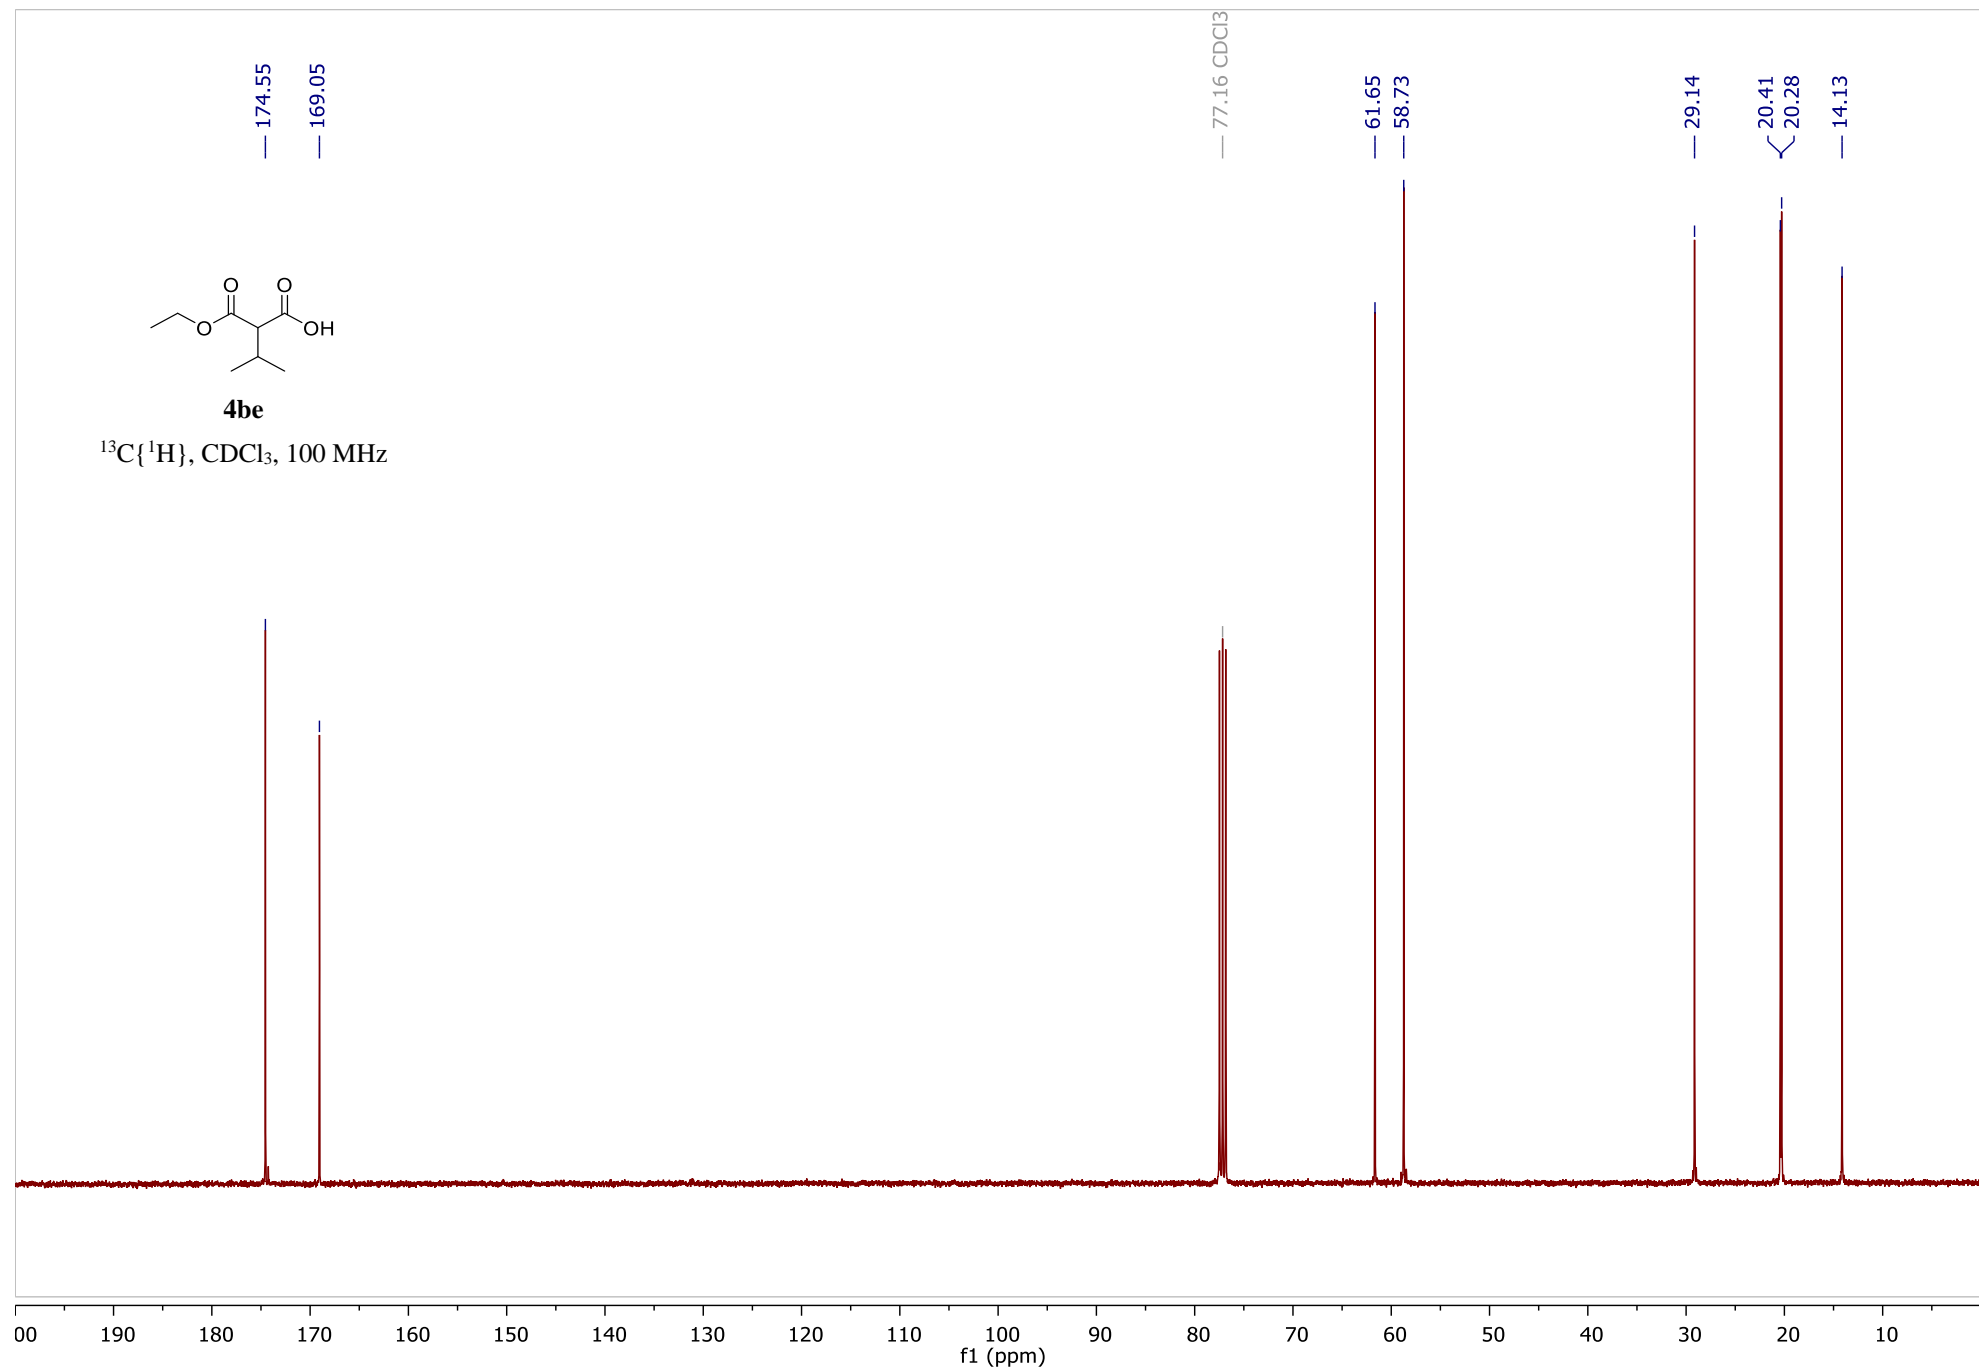

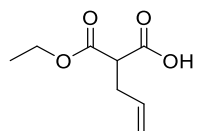

**4bf**

$^1\text{H}$ ,  $\text{CDCl}_3$ , 400 MHz

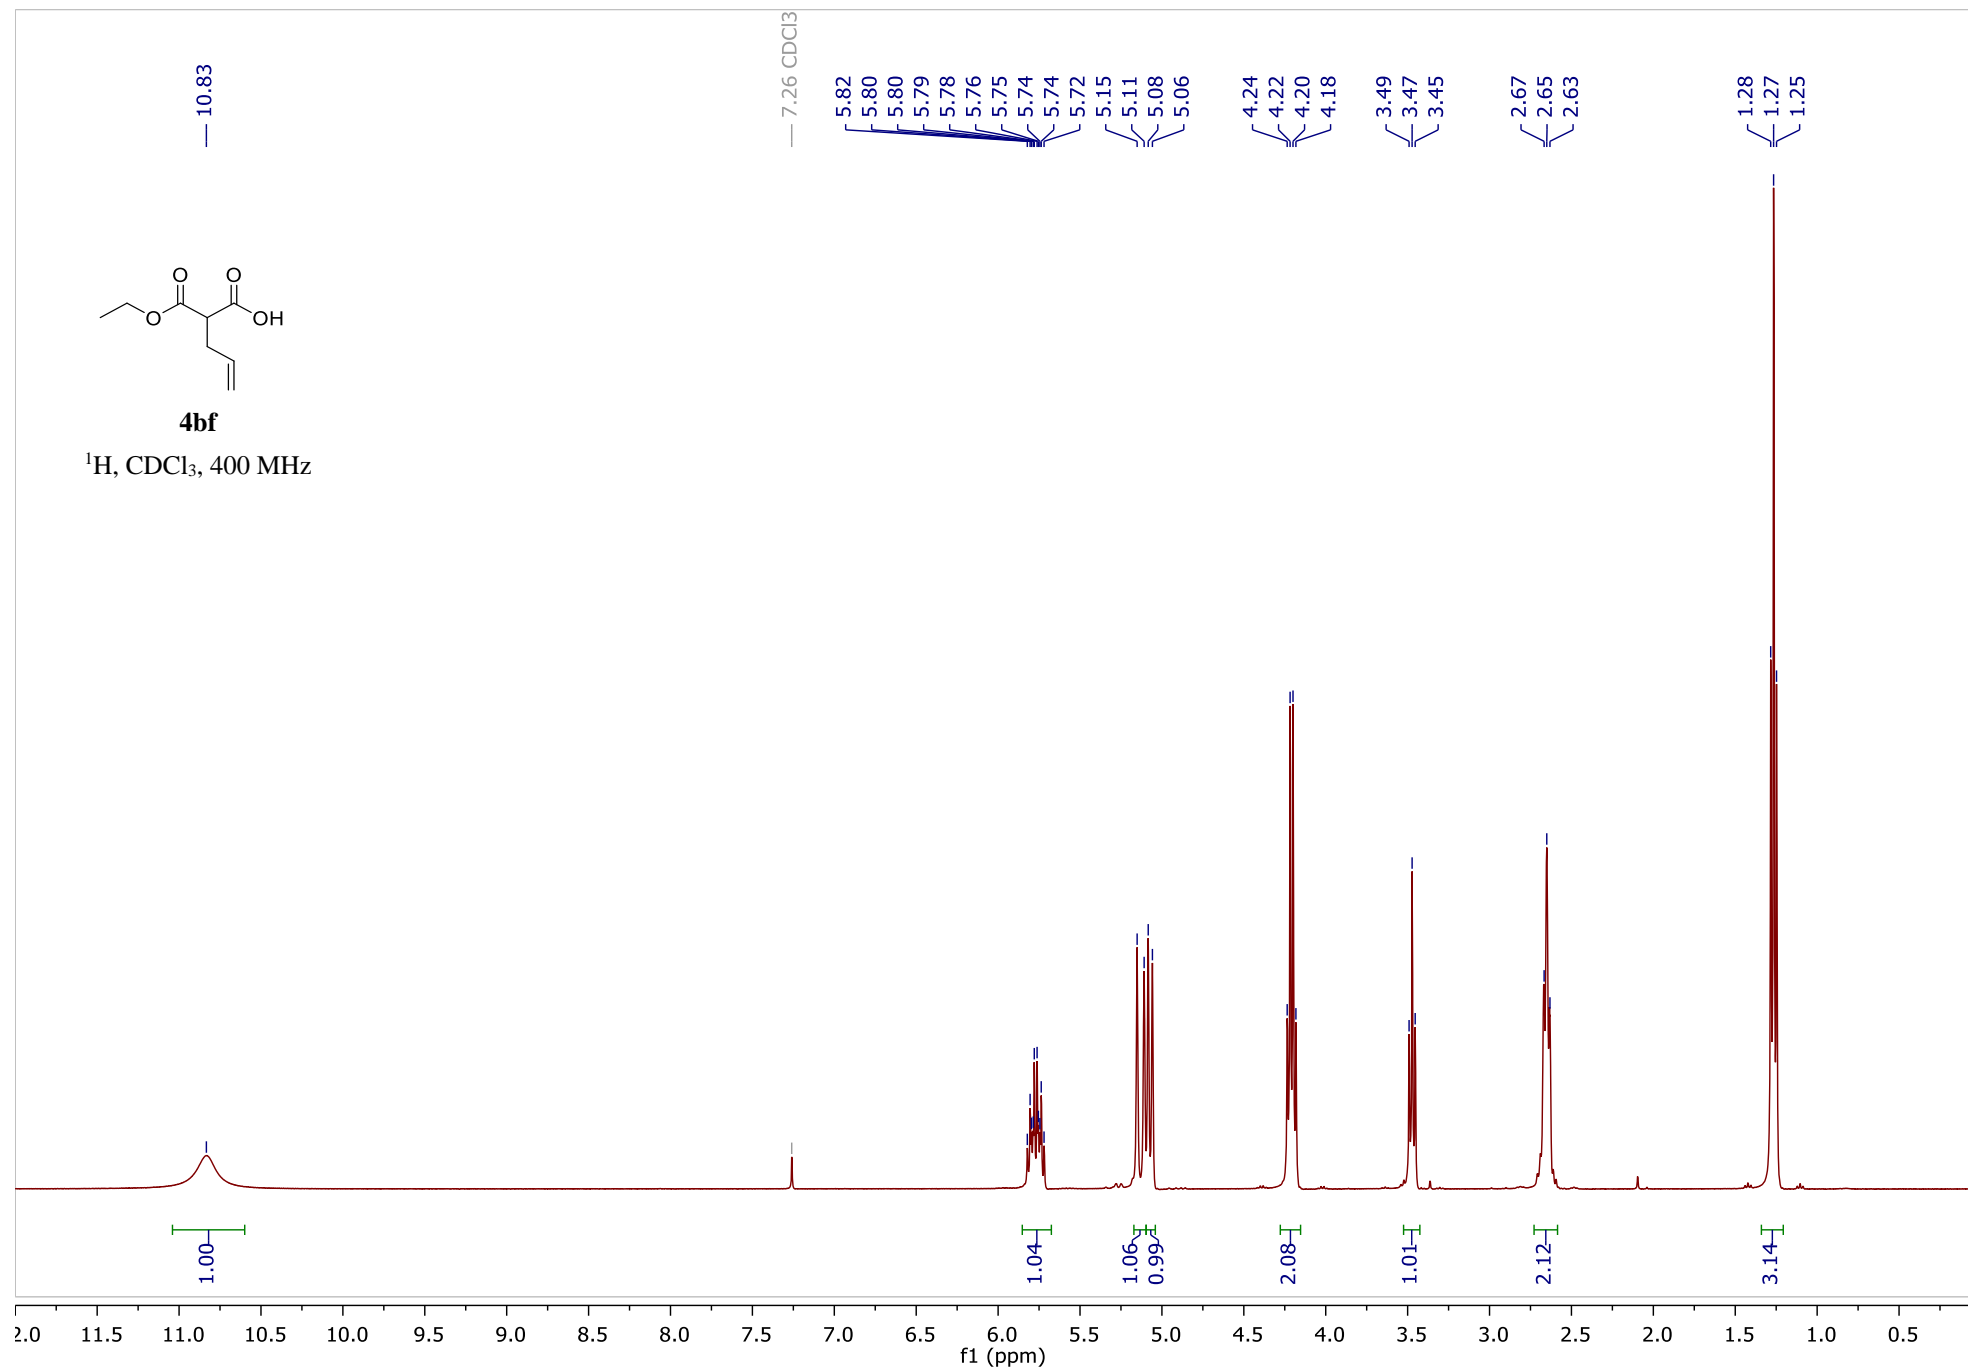

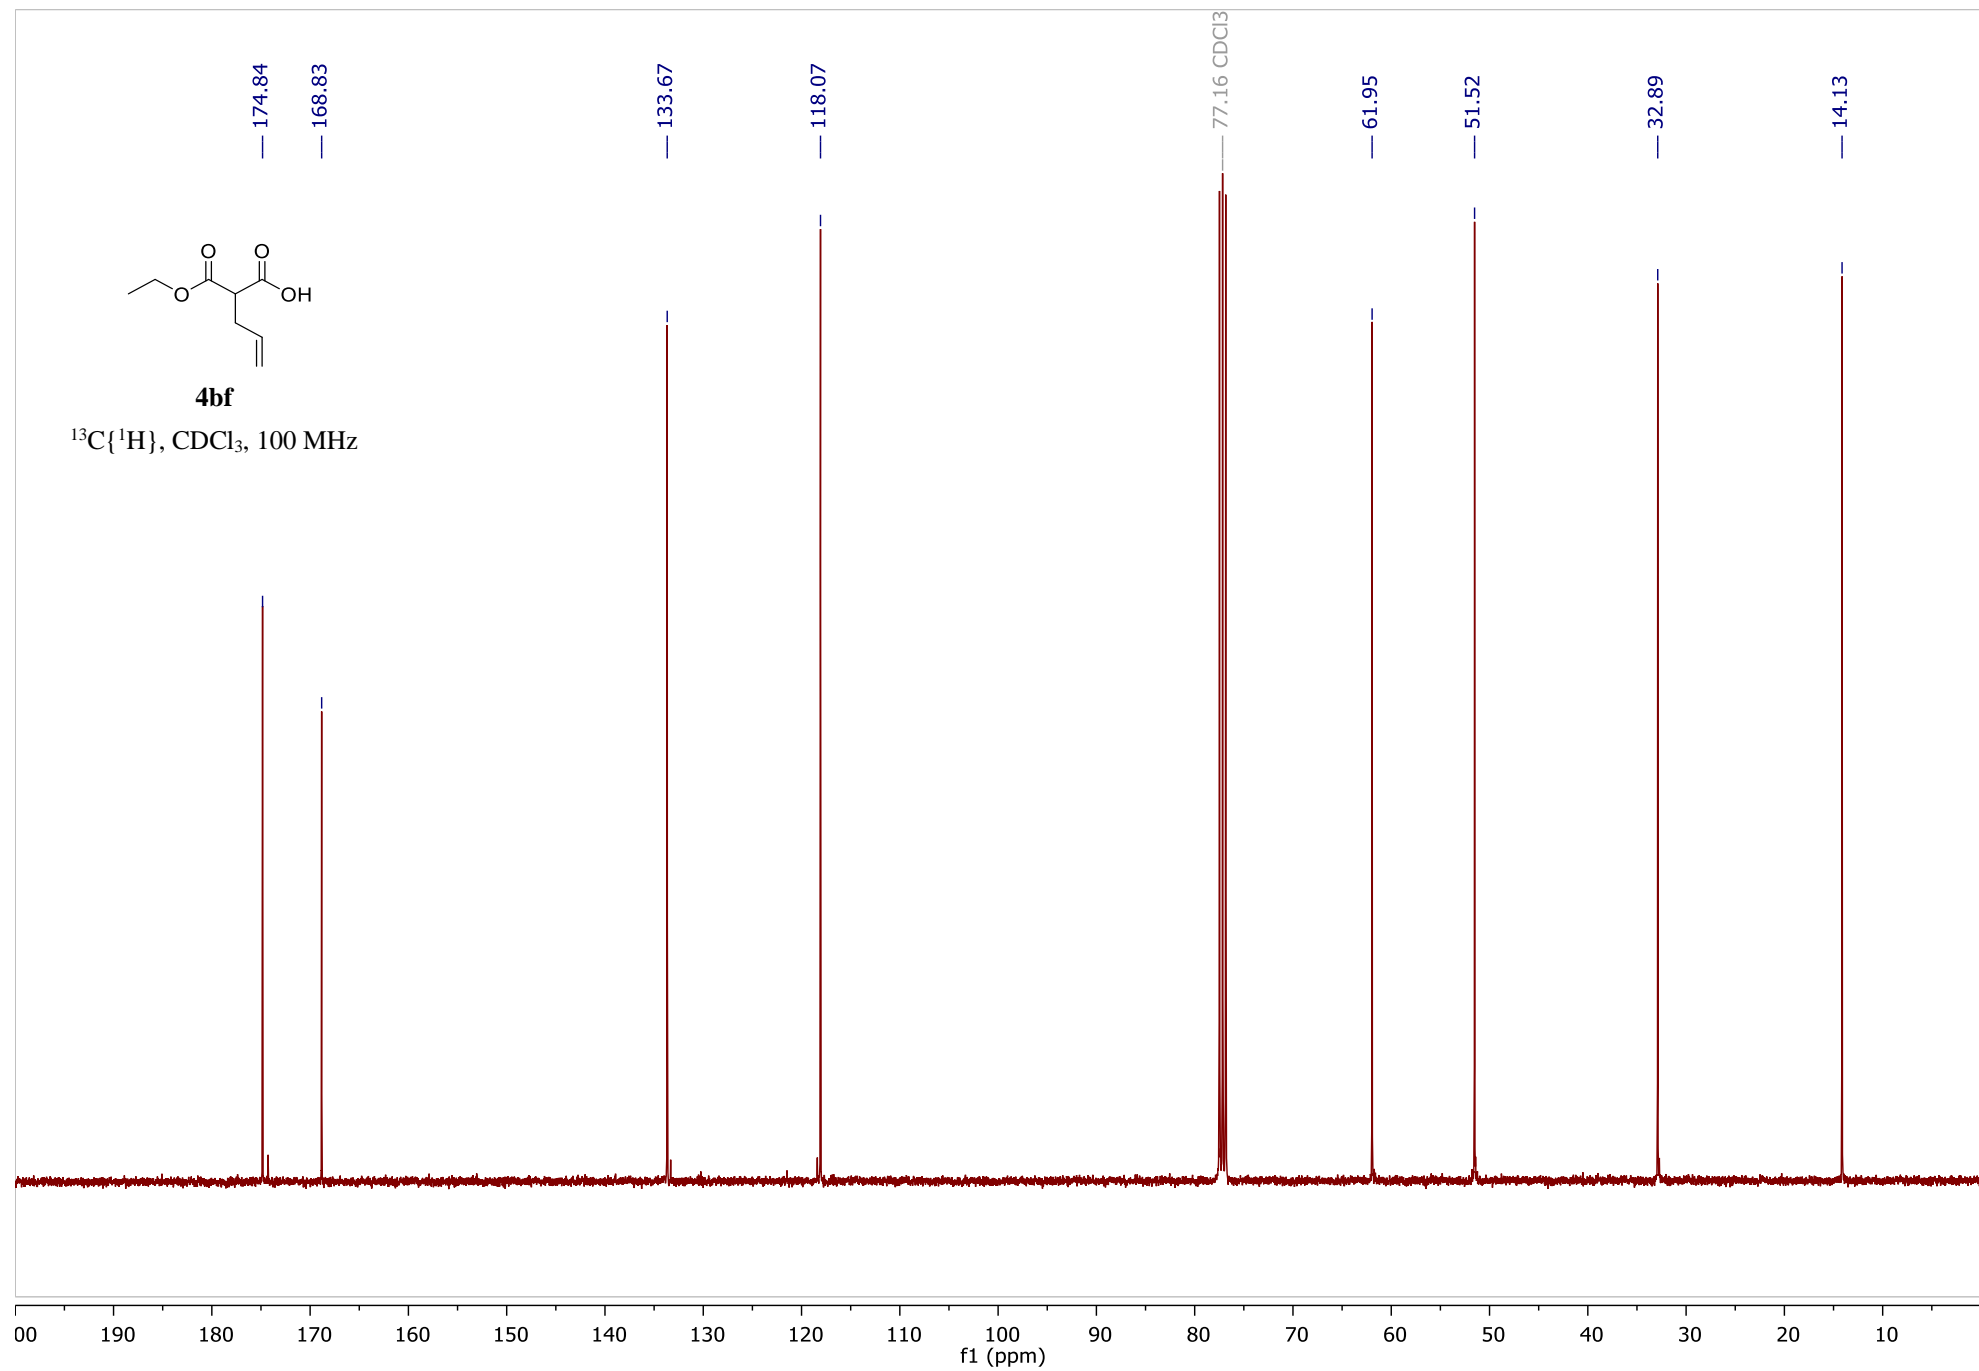

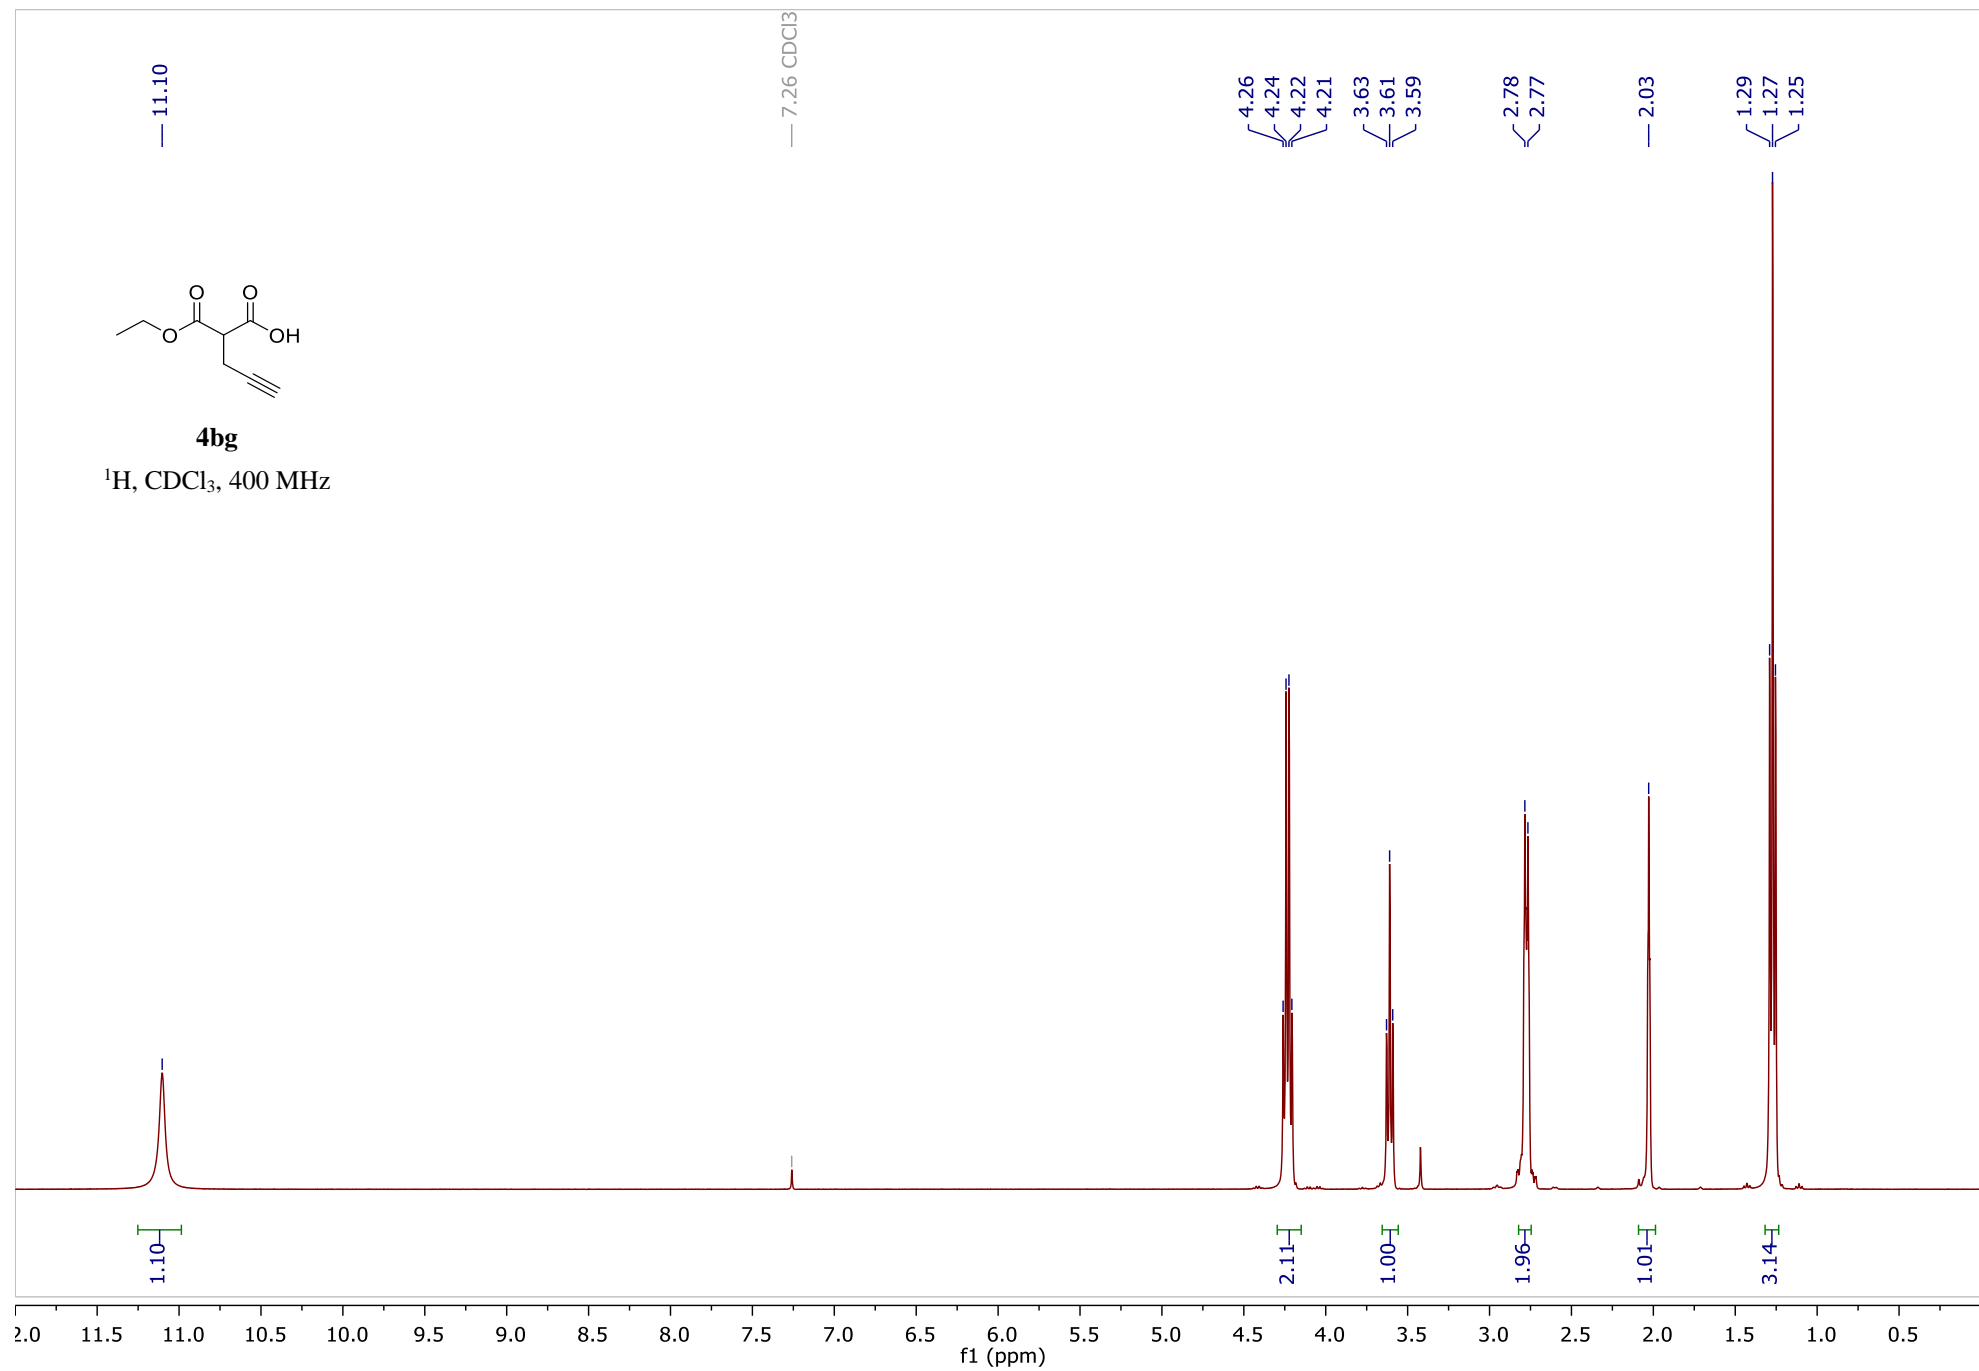



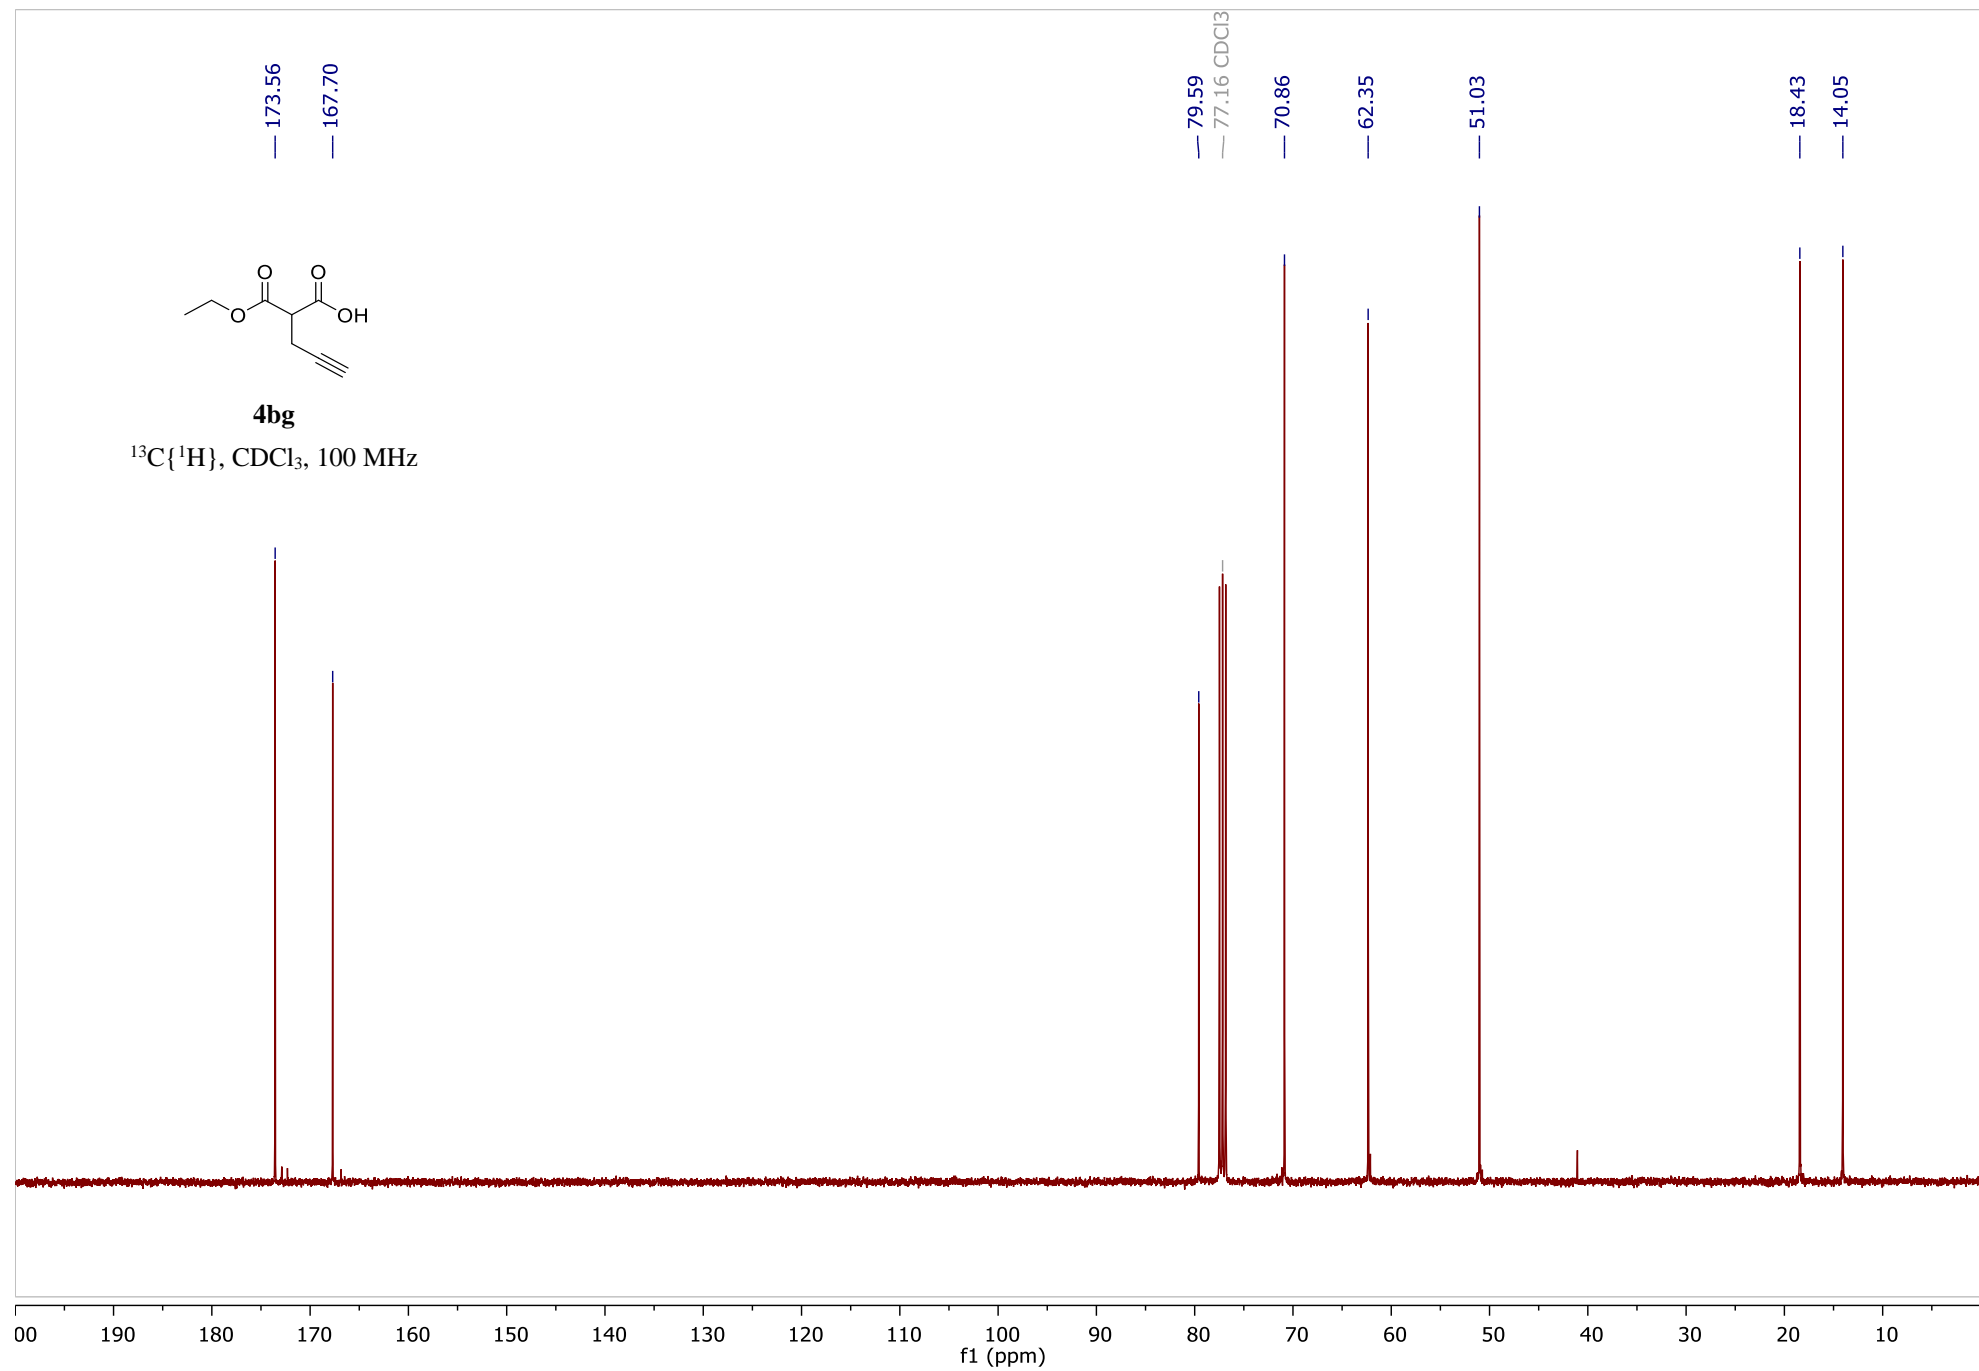

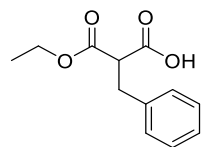

**4bh**

$^1\text{H}$ ,  $\text{CDCl}_3$ , 400 MHz

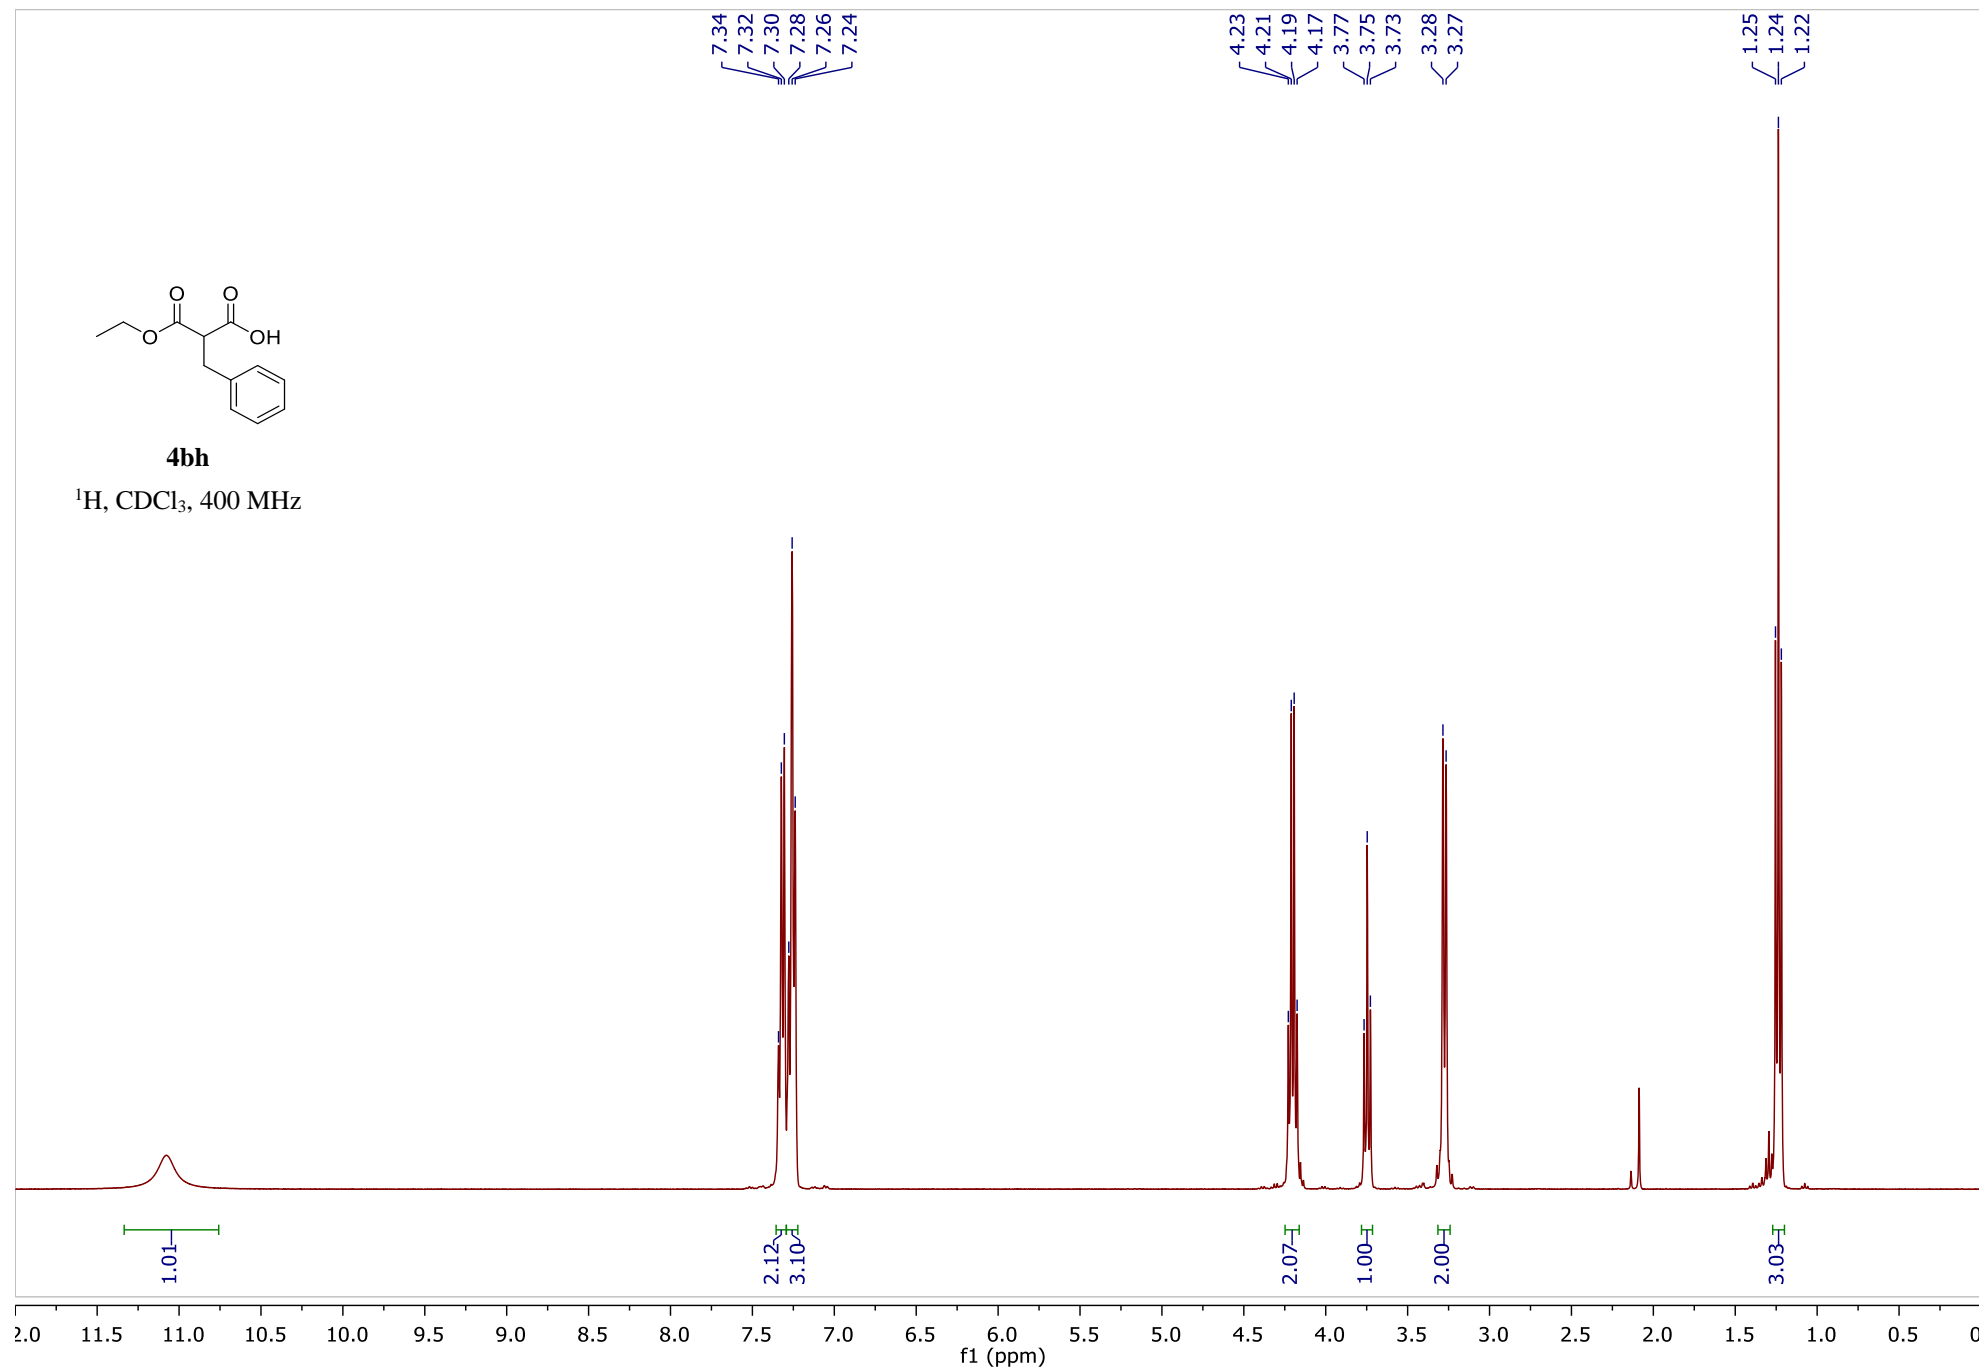

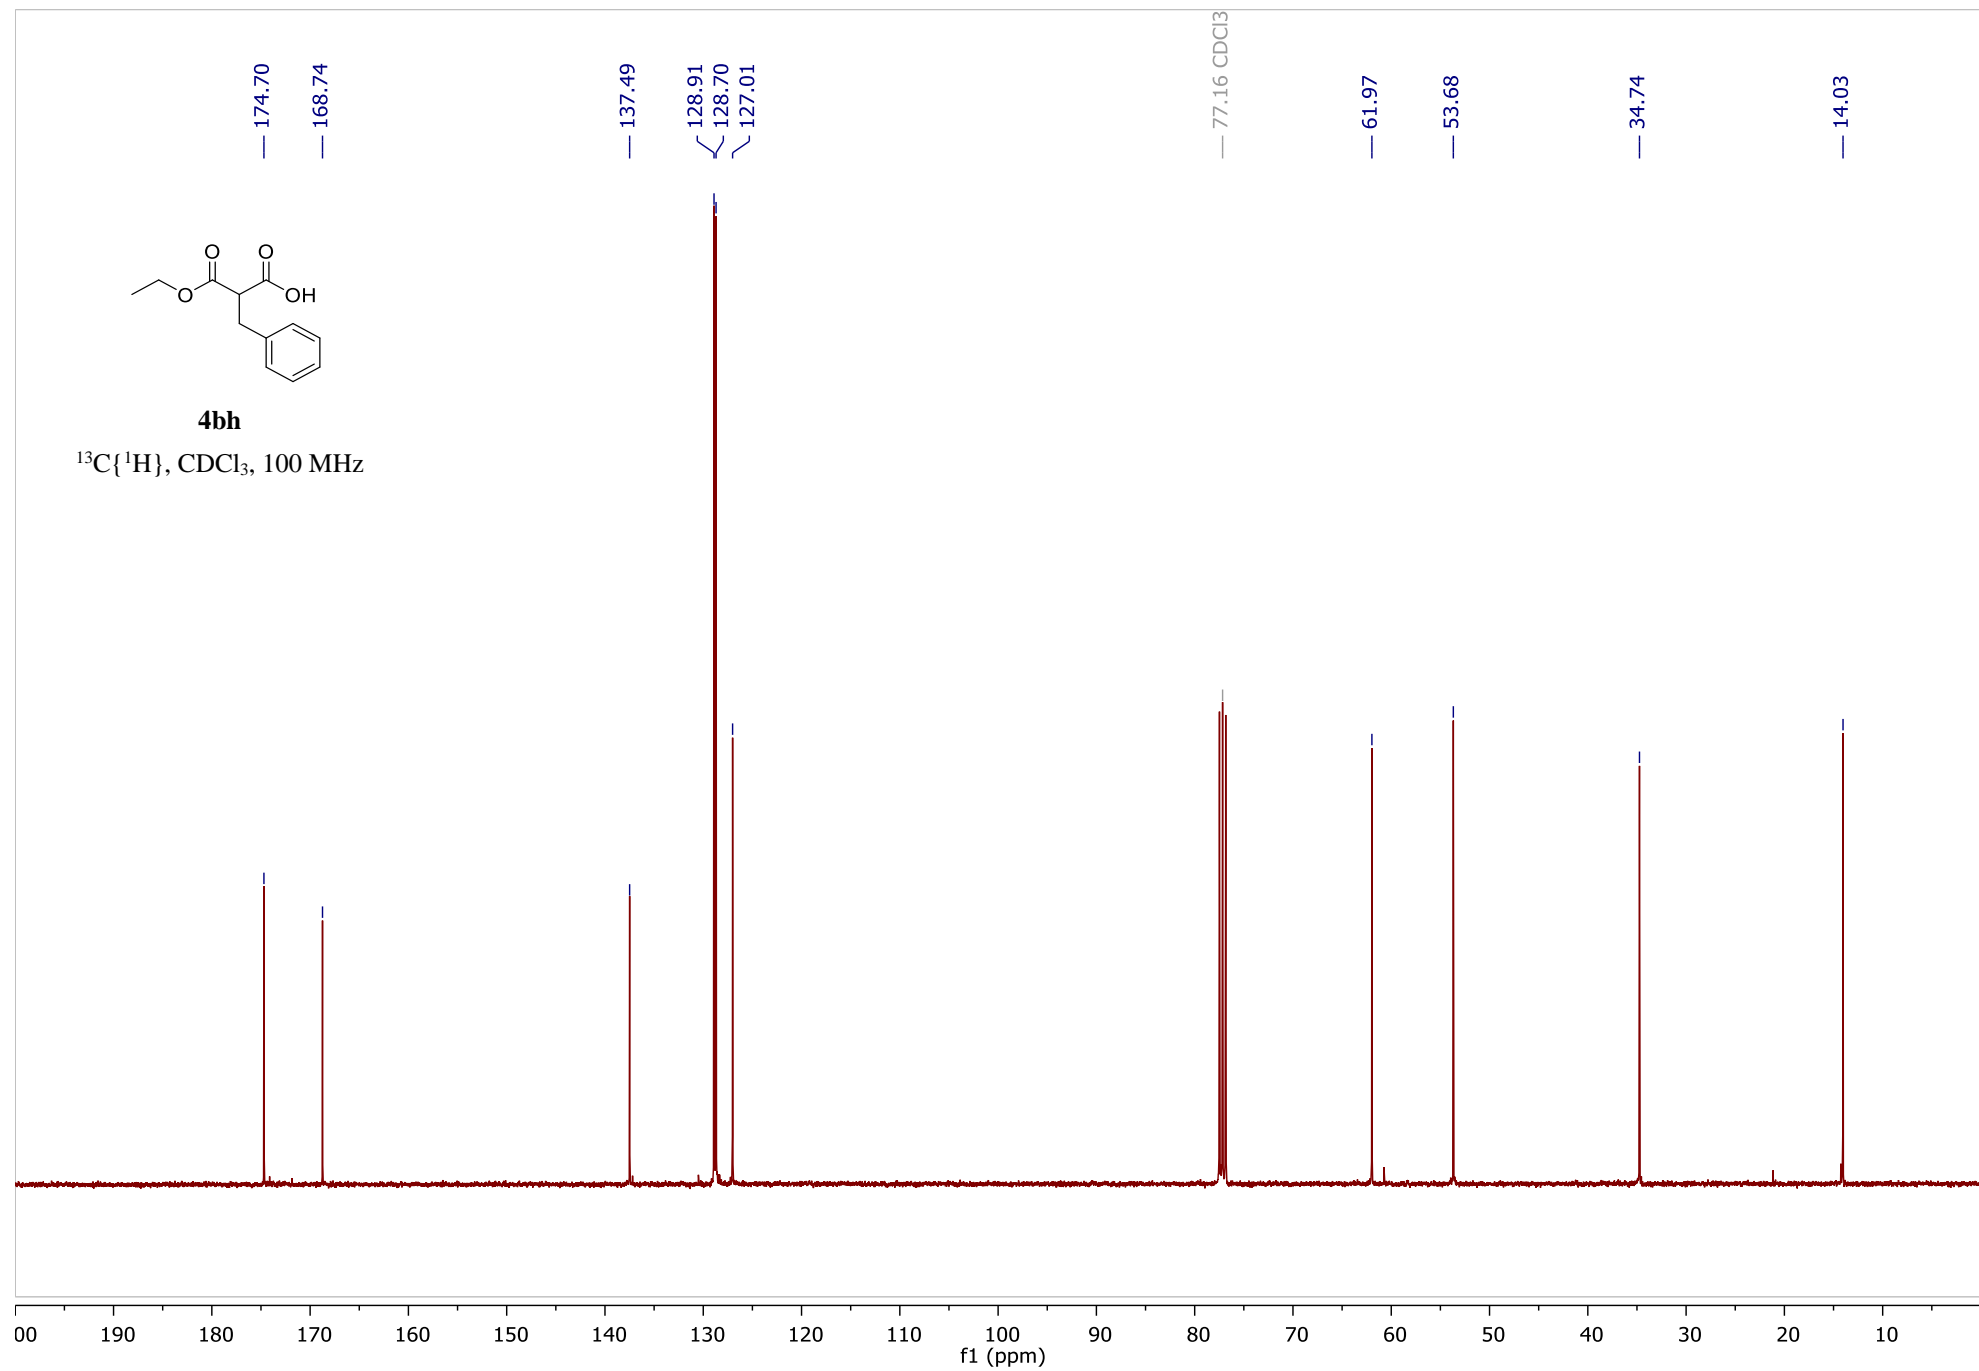

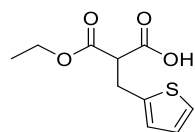

**4bi**

$^1\text{H}$ ,  $\text{CDCl}_3$ , 400 MHz

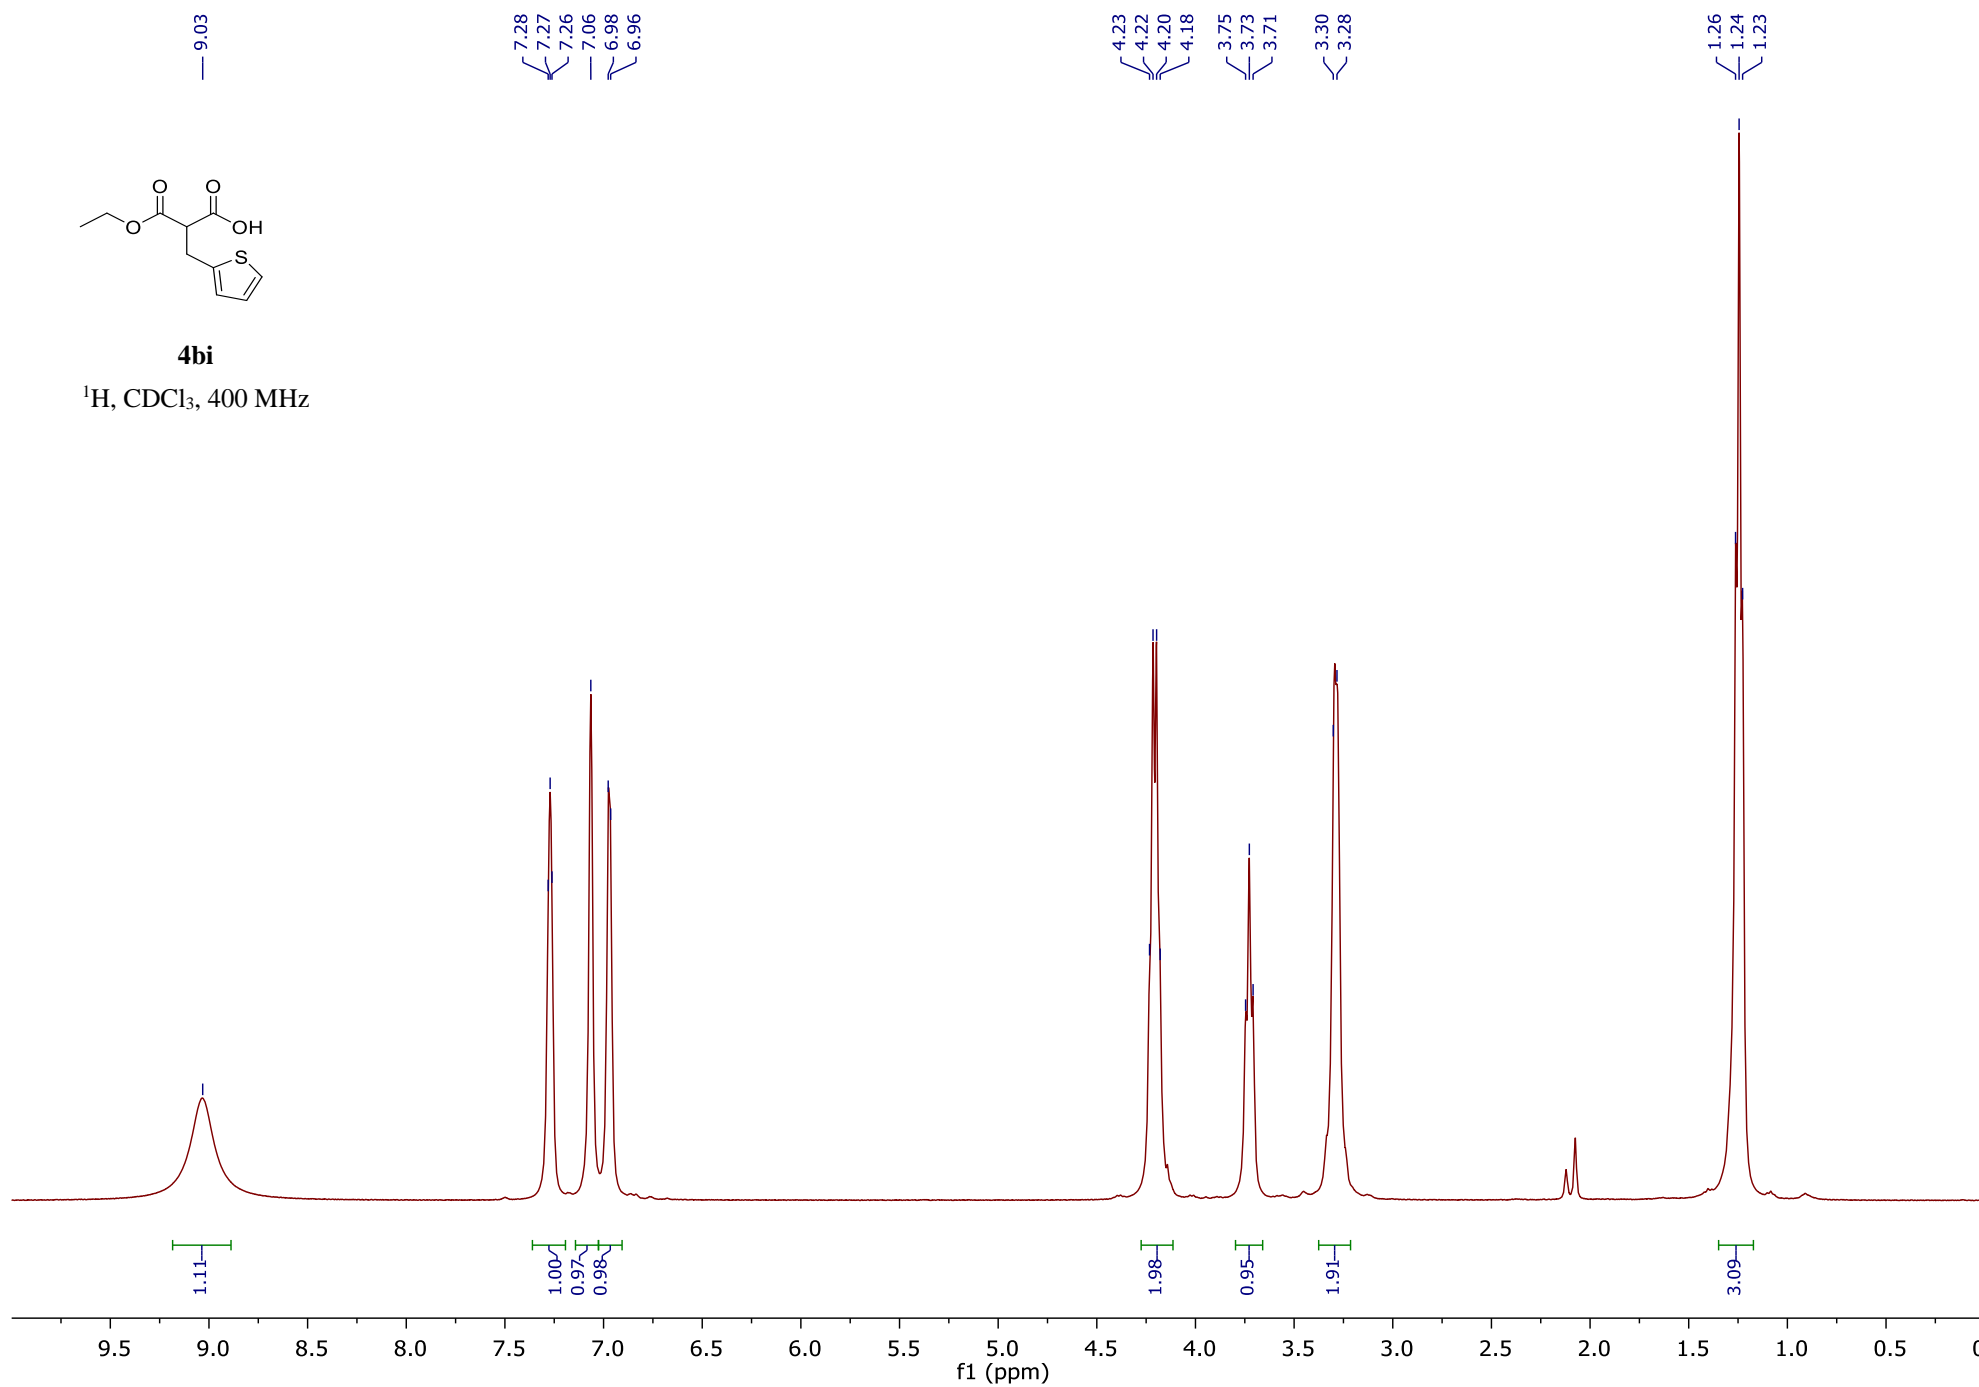

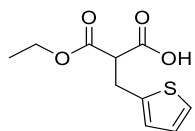

**4bi**

$^{13}\text{C}\{^1\text{H}\}$ ,  $\text{CDCl}_3$ , 100 MHz

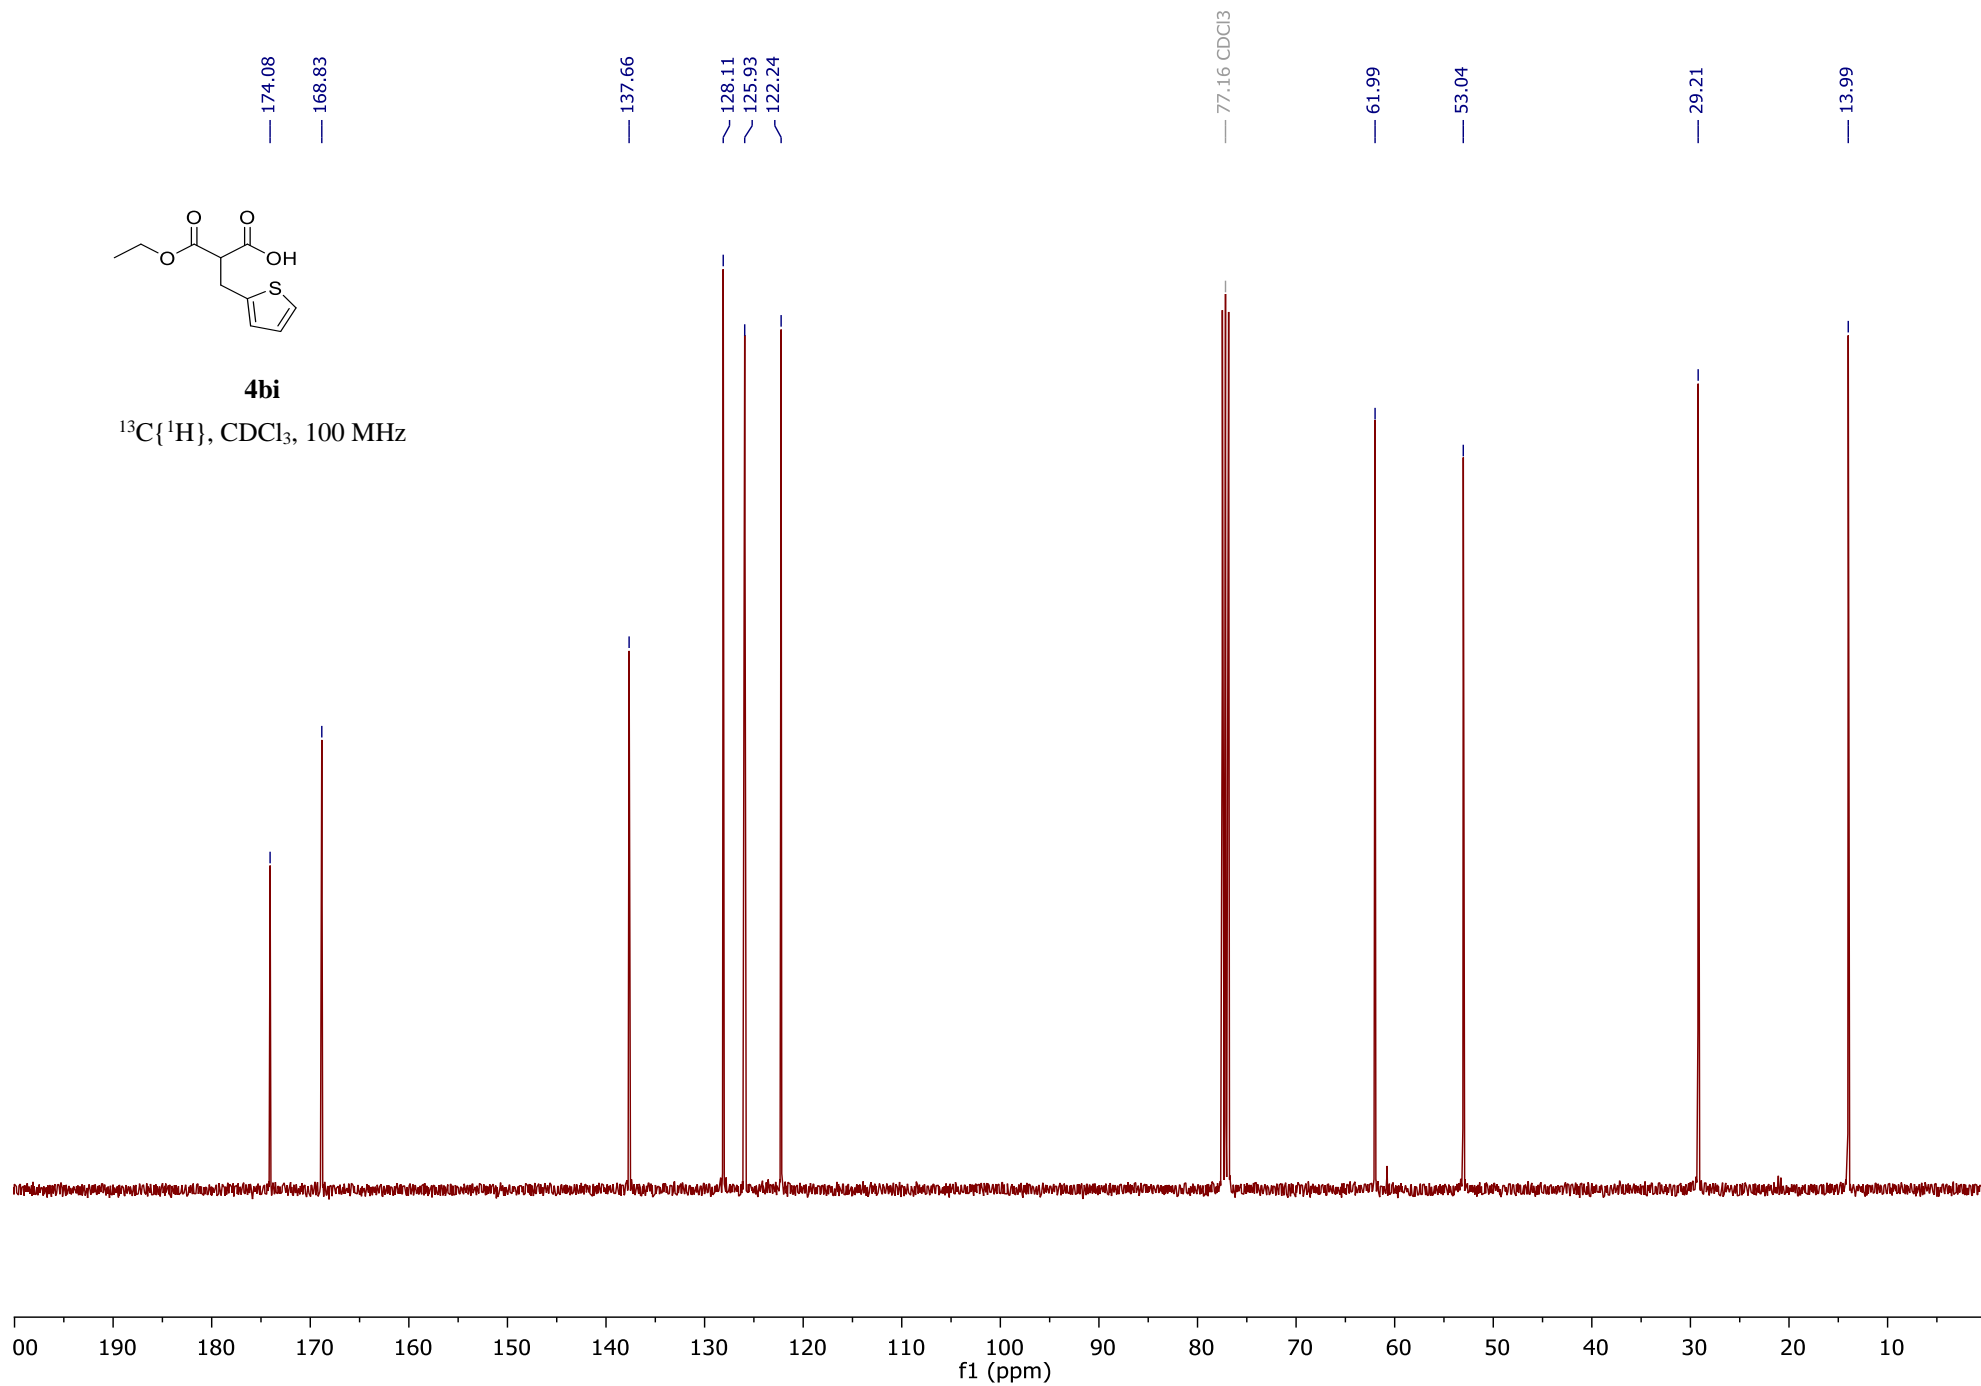

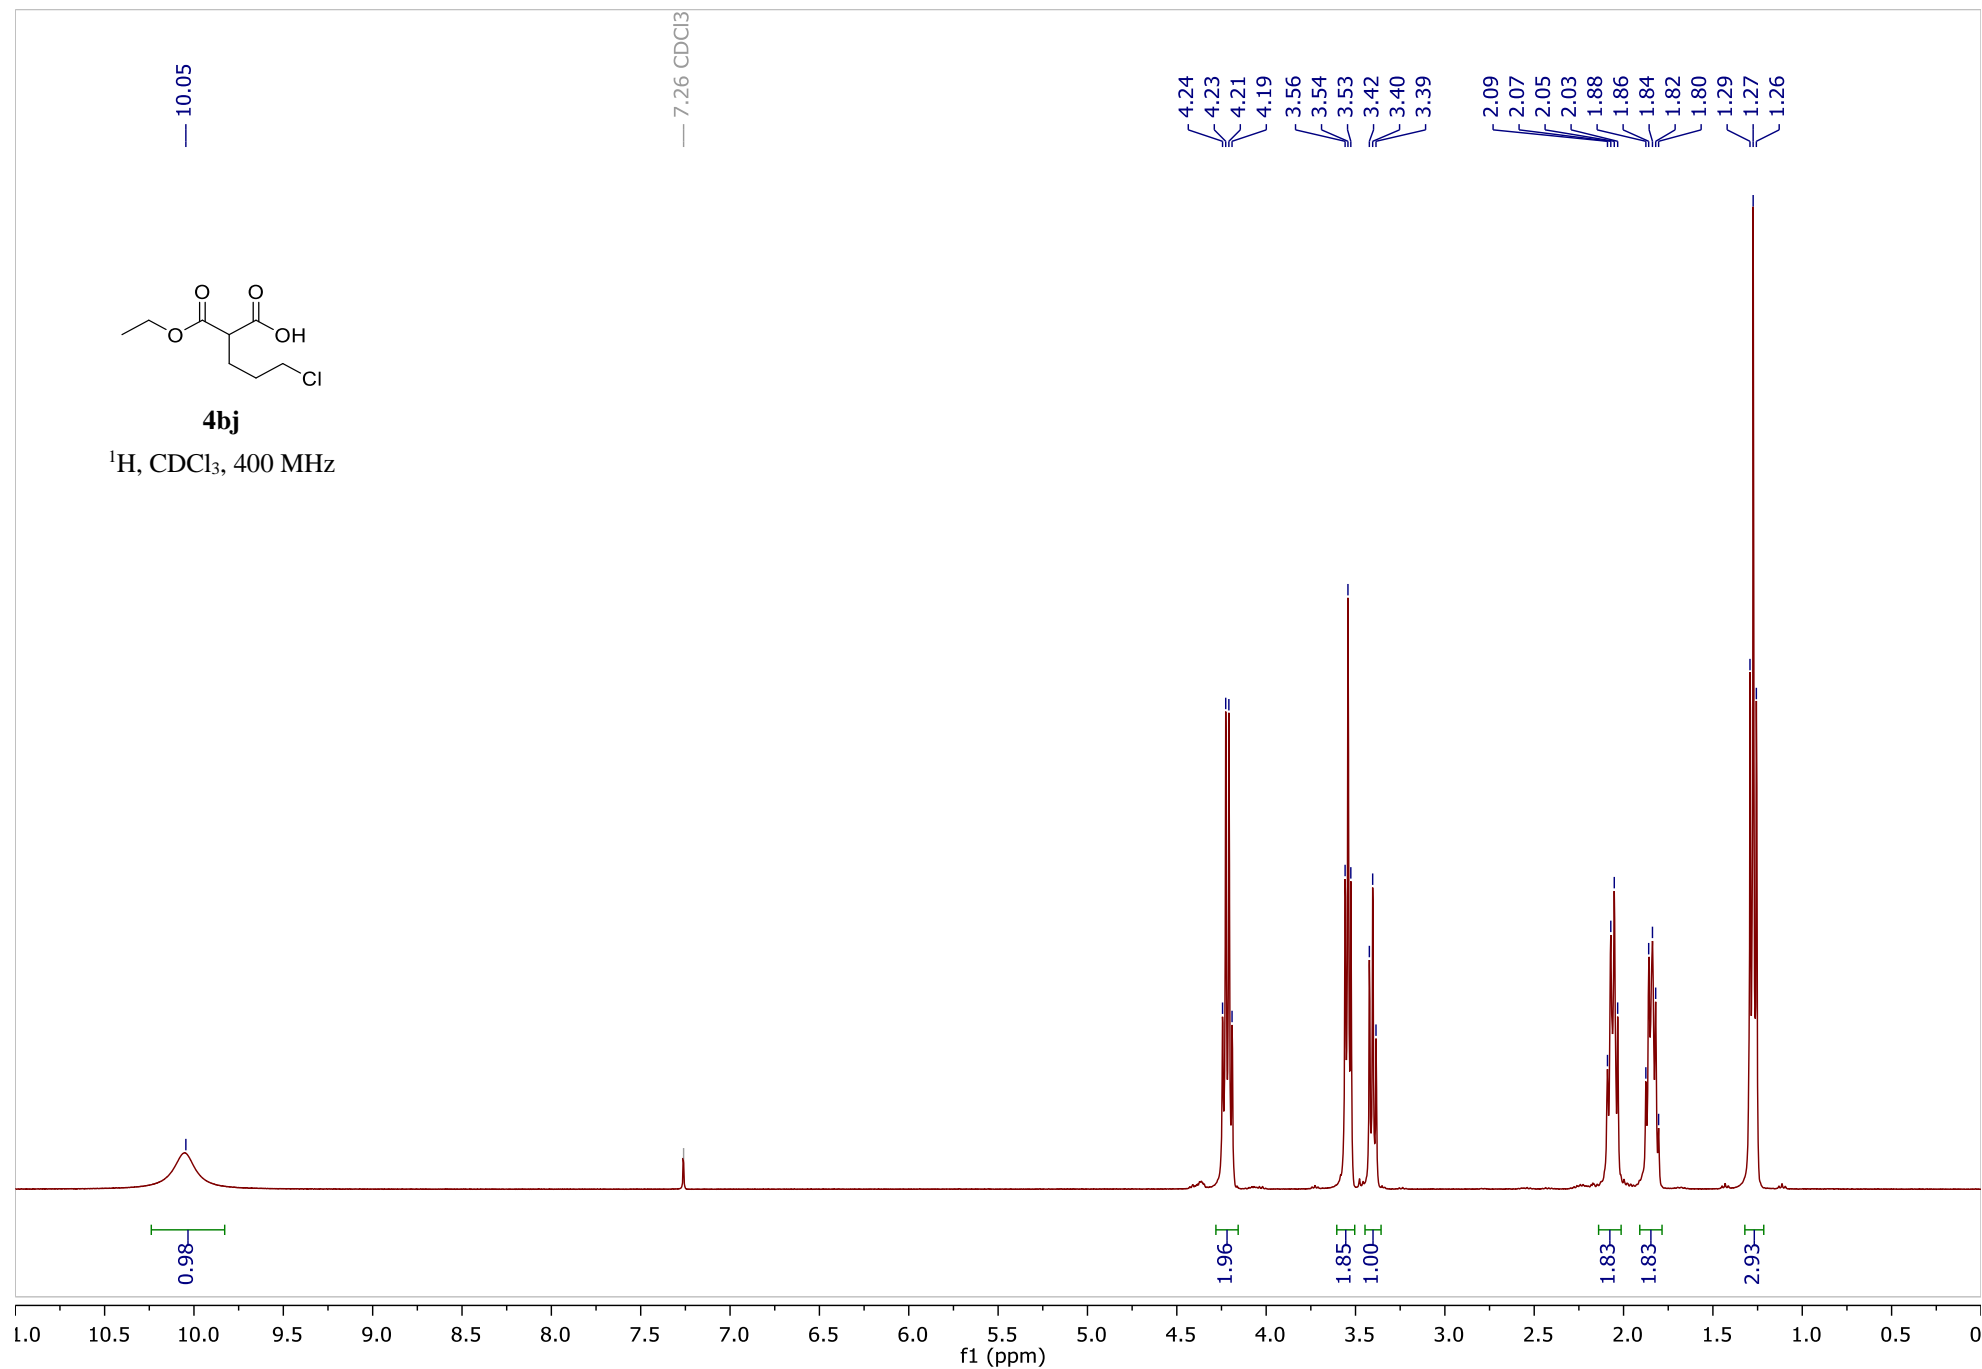

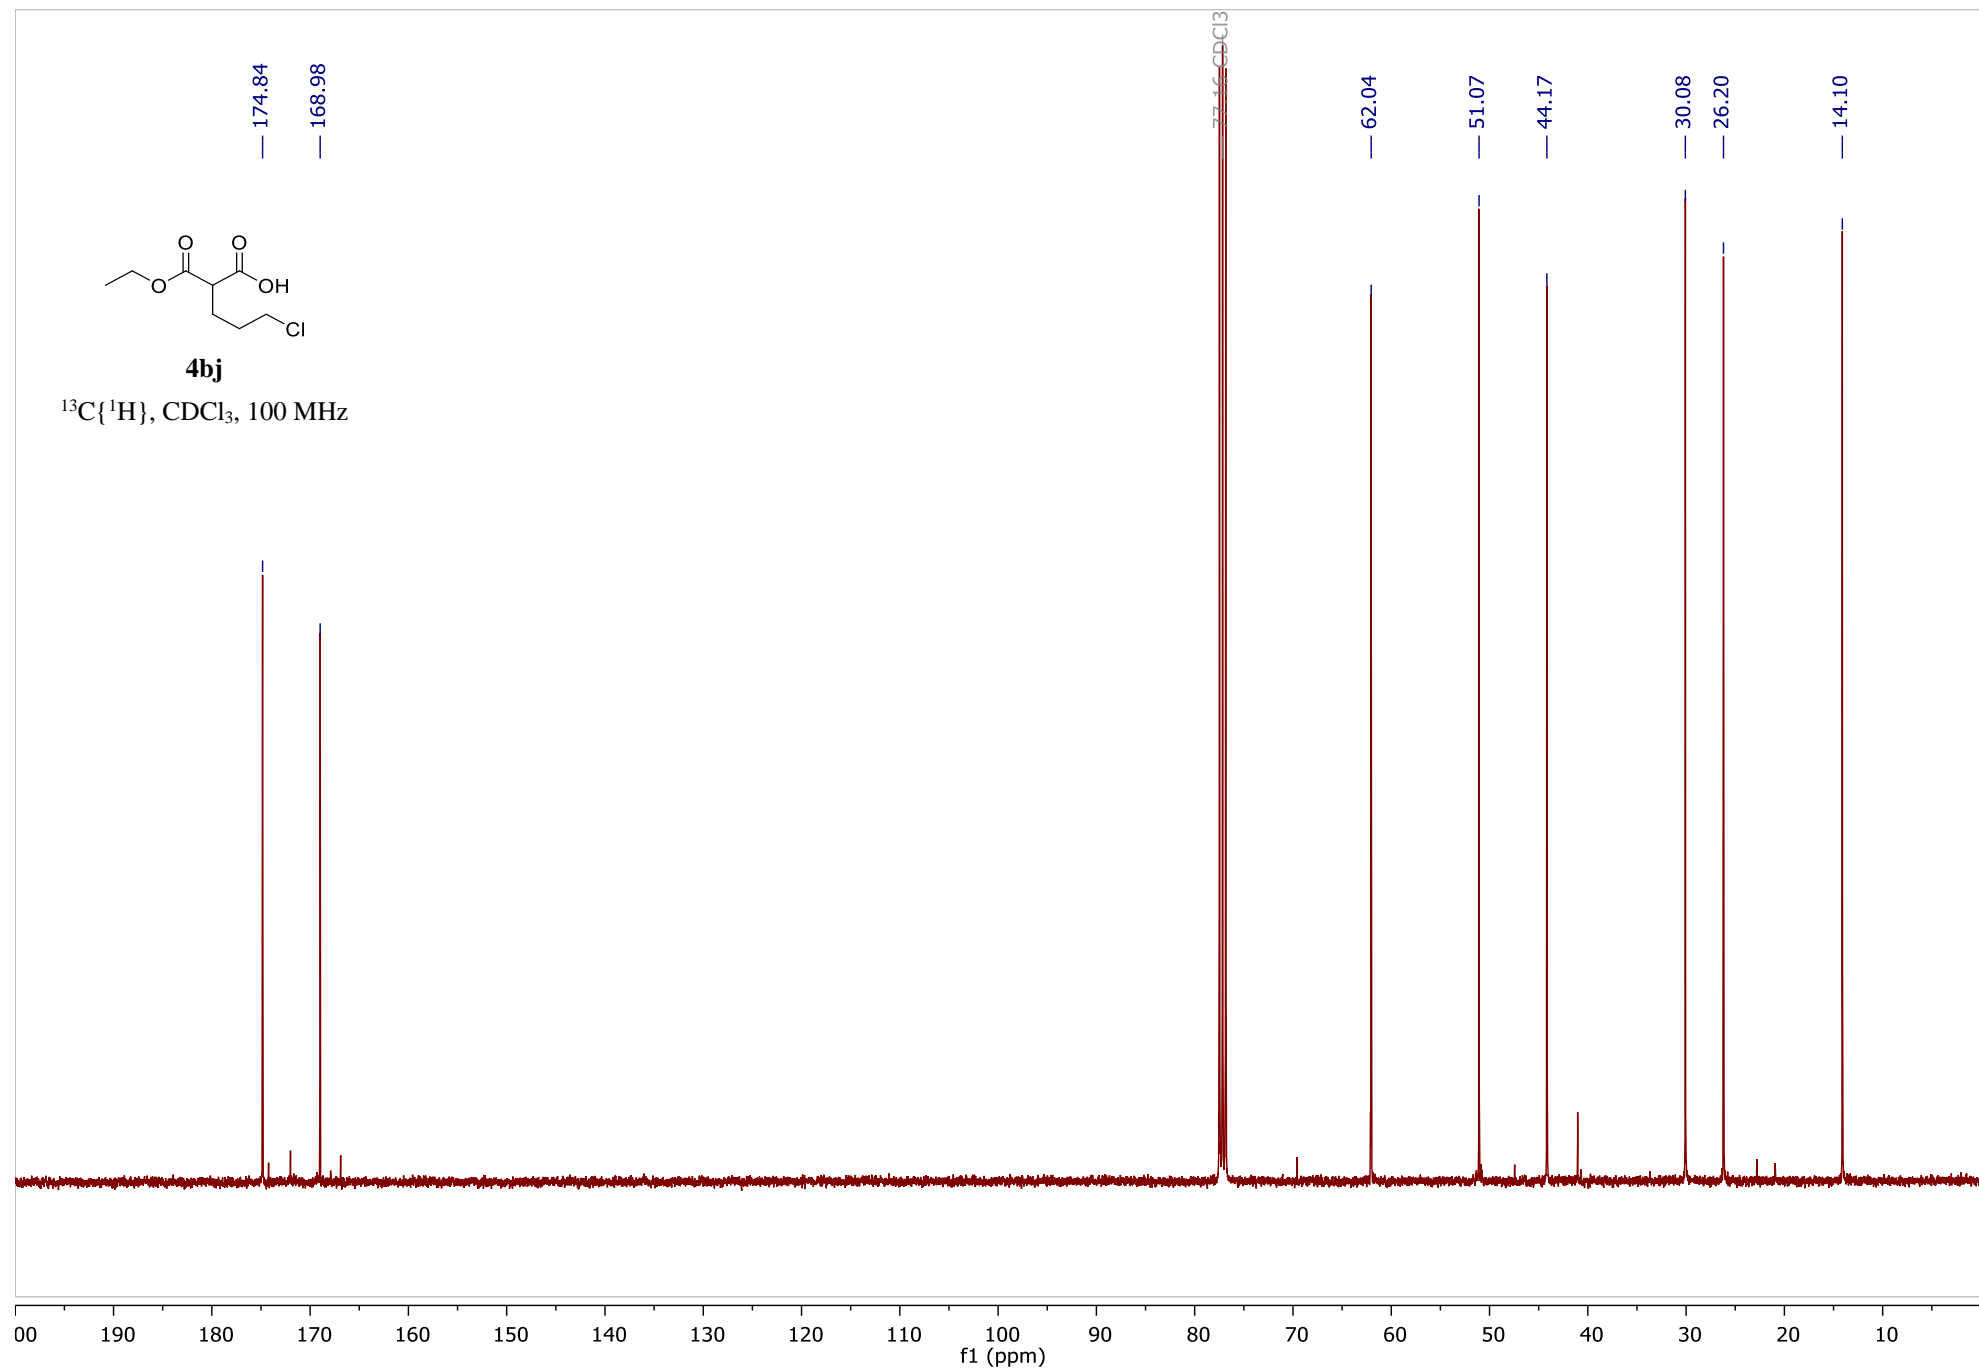

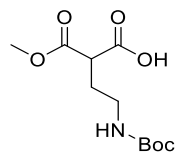

**4ak**

$^1\text{H}$ ,  $\text{CD}_3\text{COCD}_3$ , 400 MHz

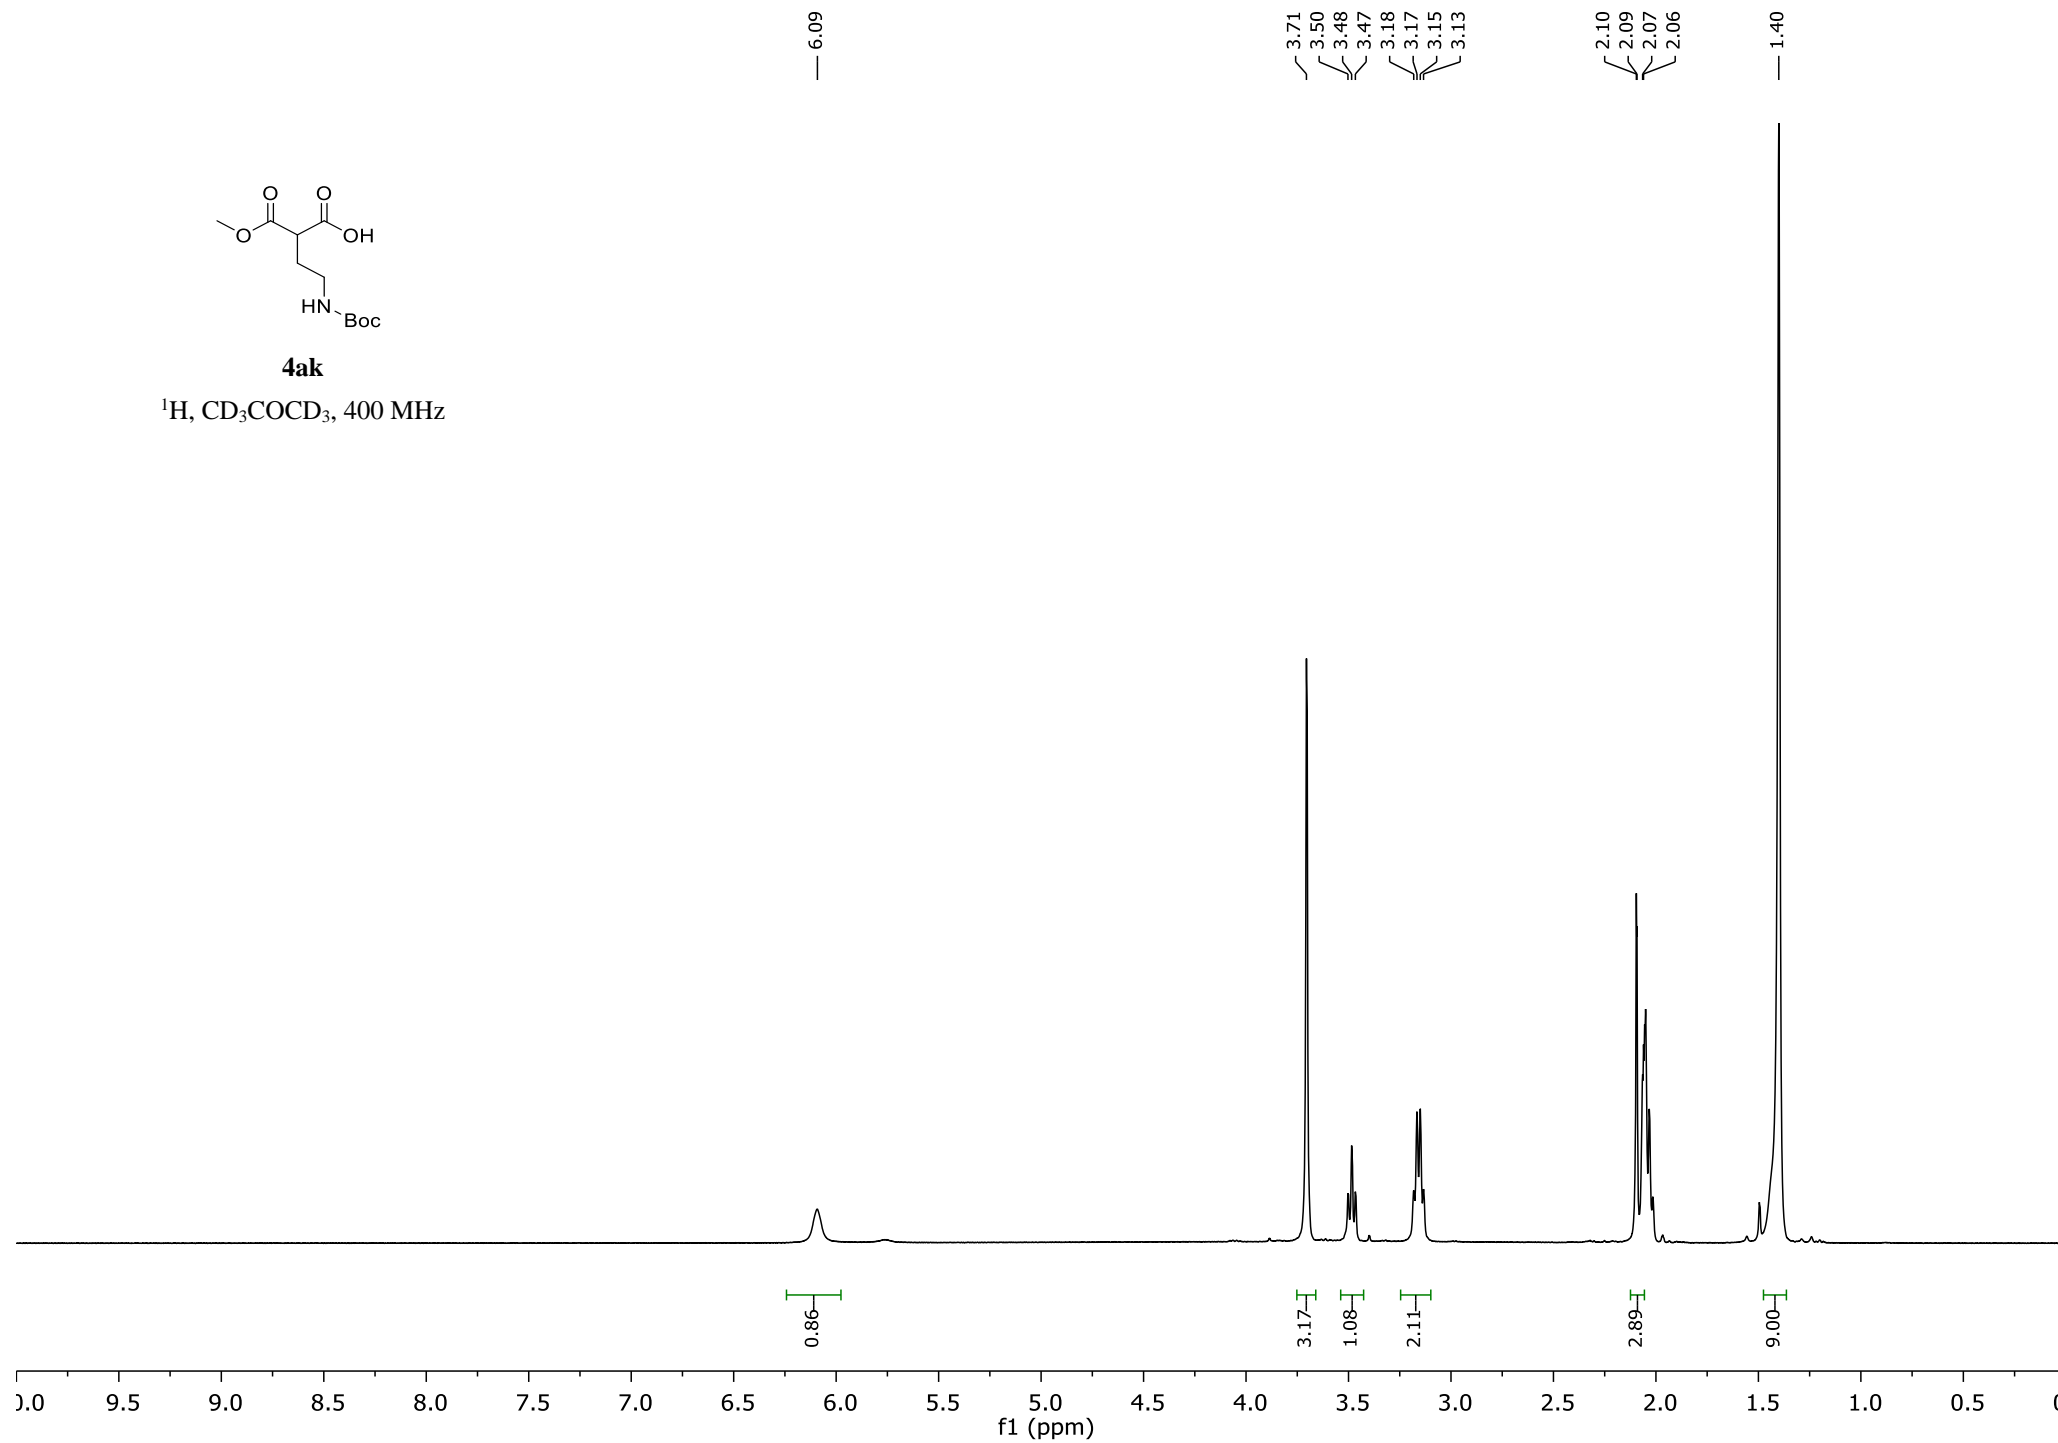



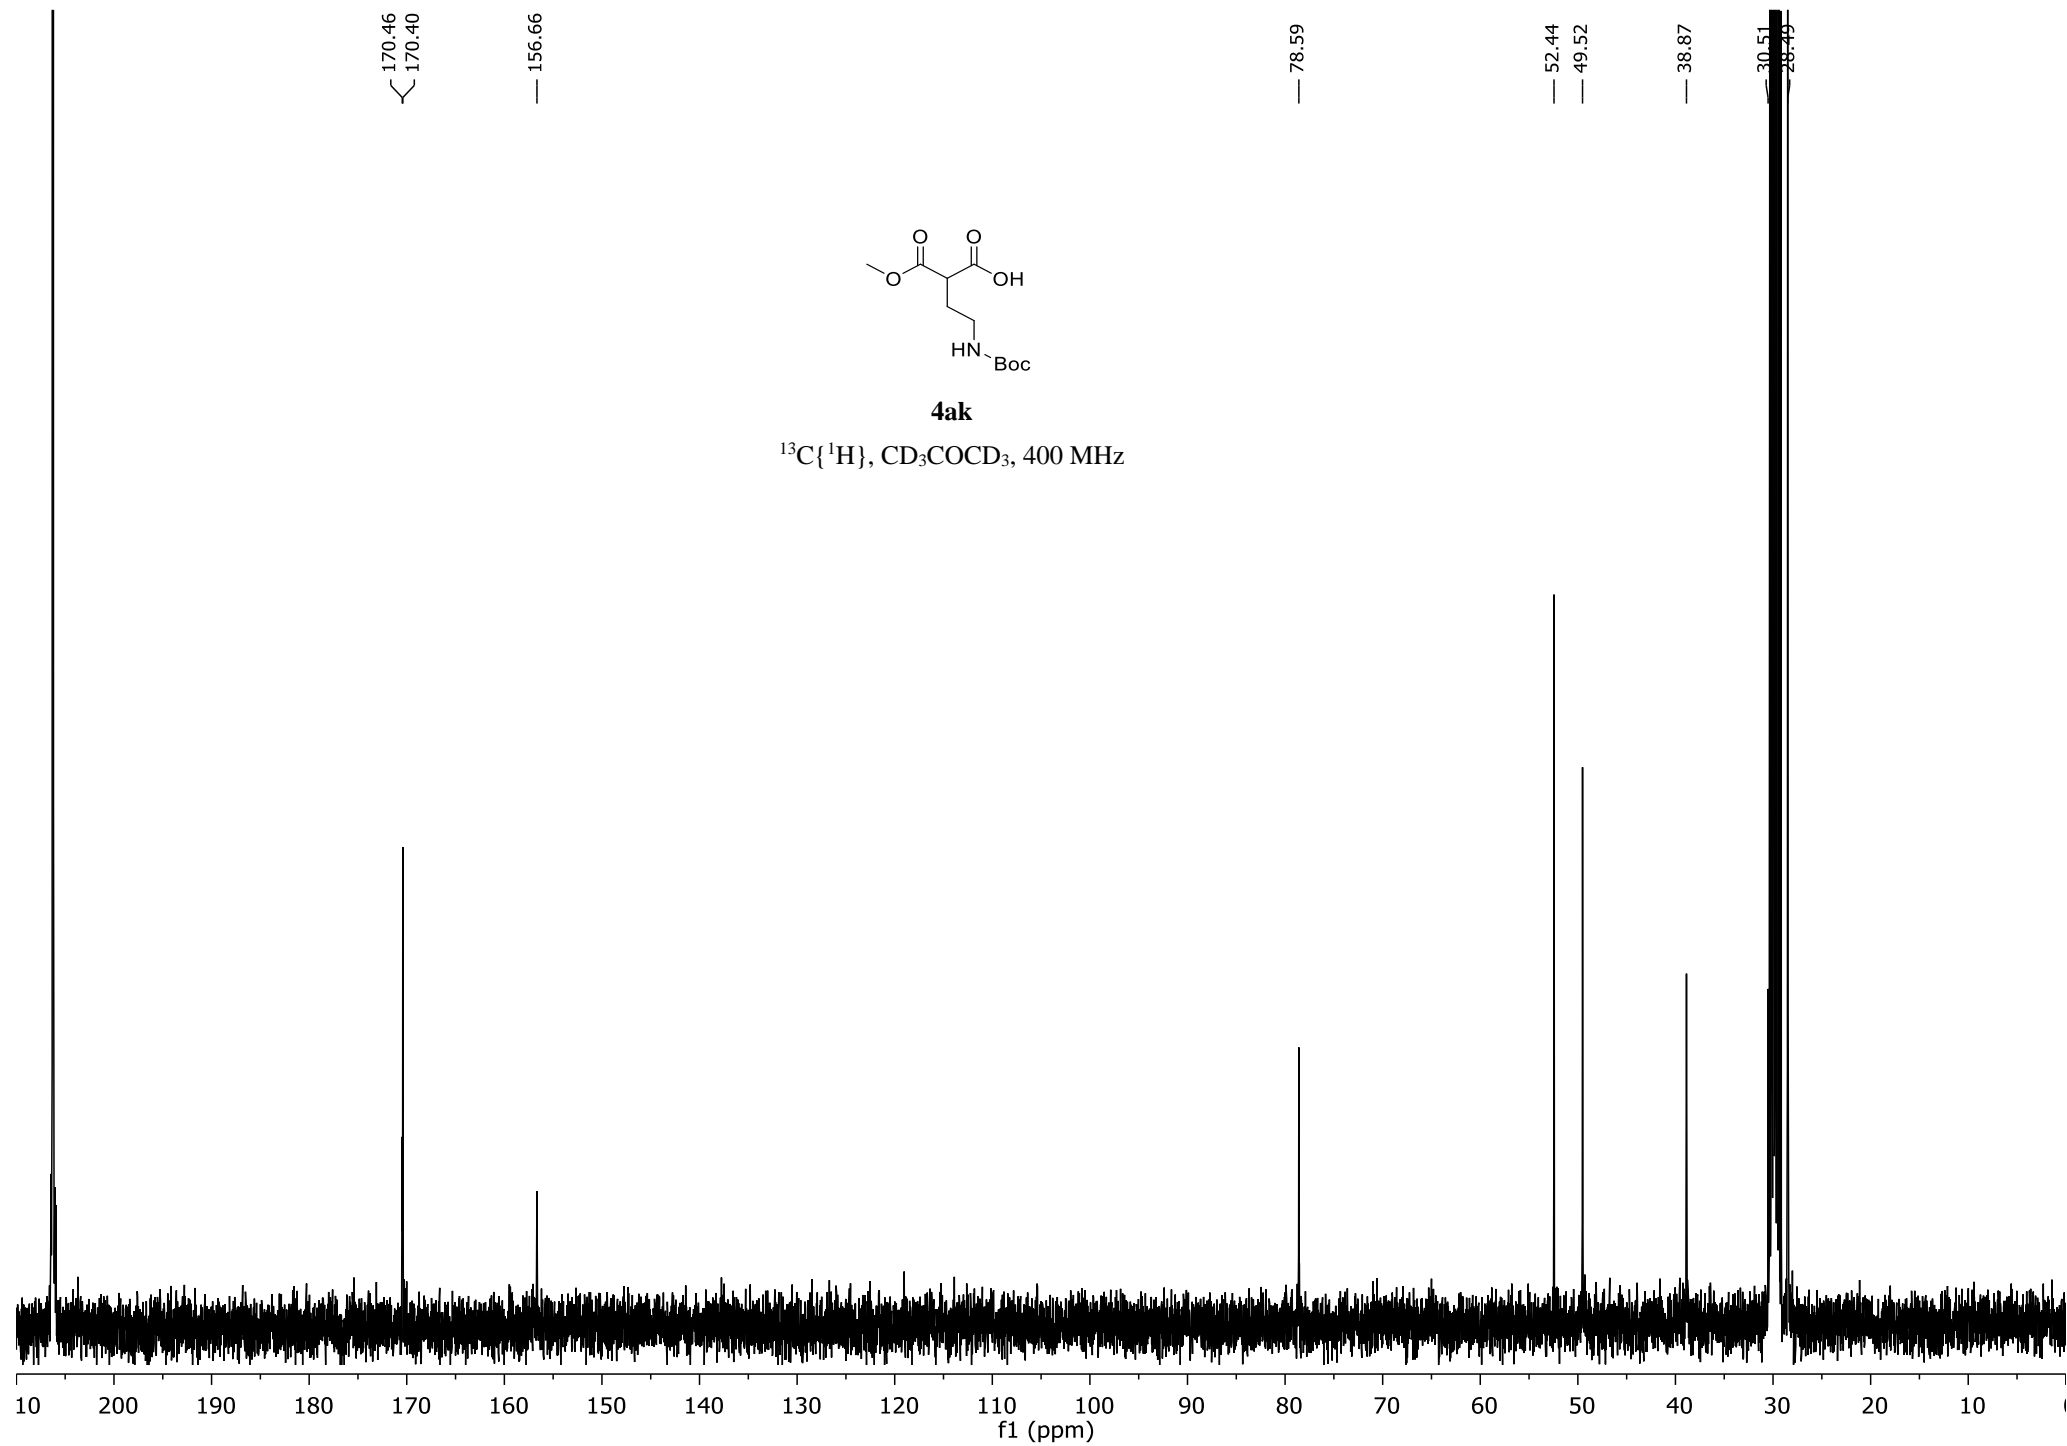

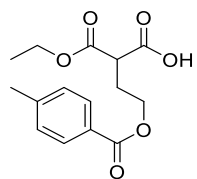

**4bl**

$^1\text{H}$ ,  $\text{CDCl}_3$ , 400 MHz

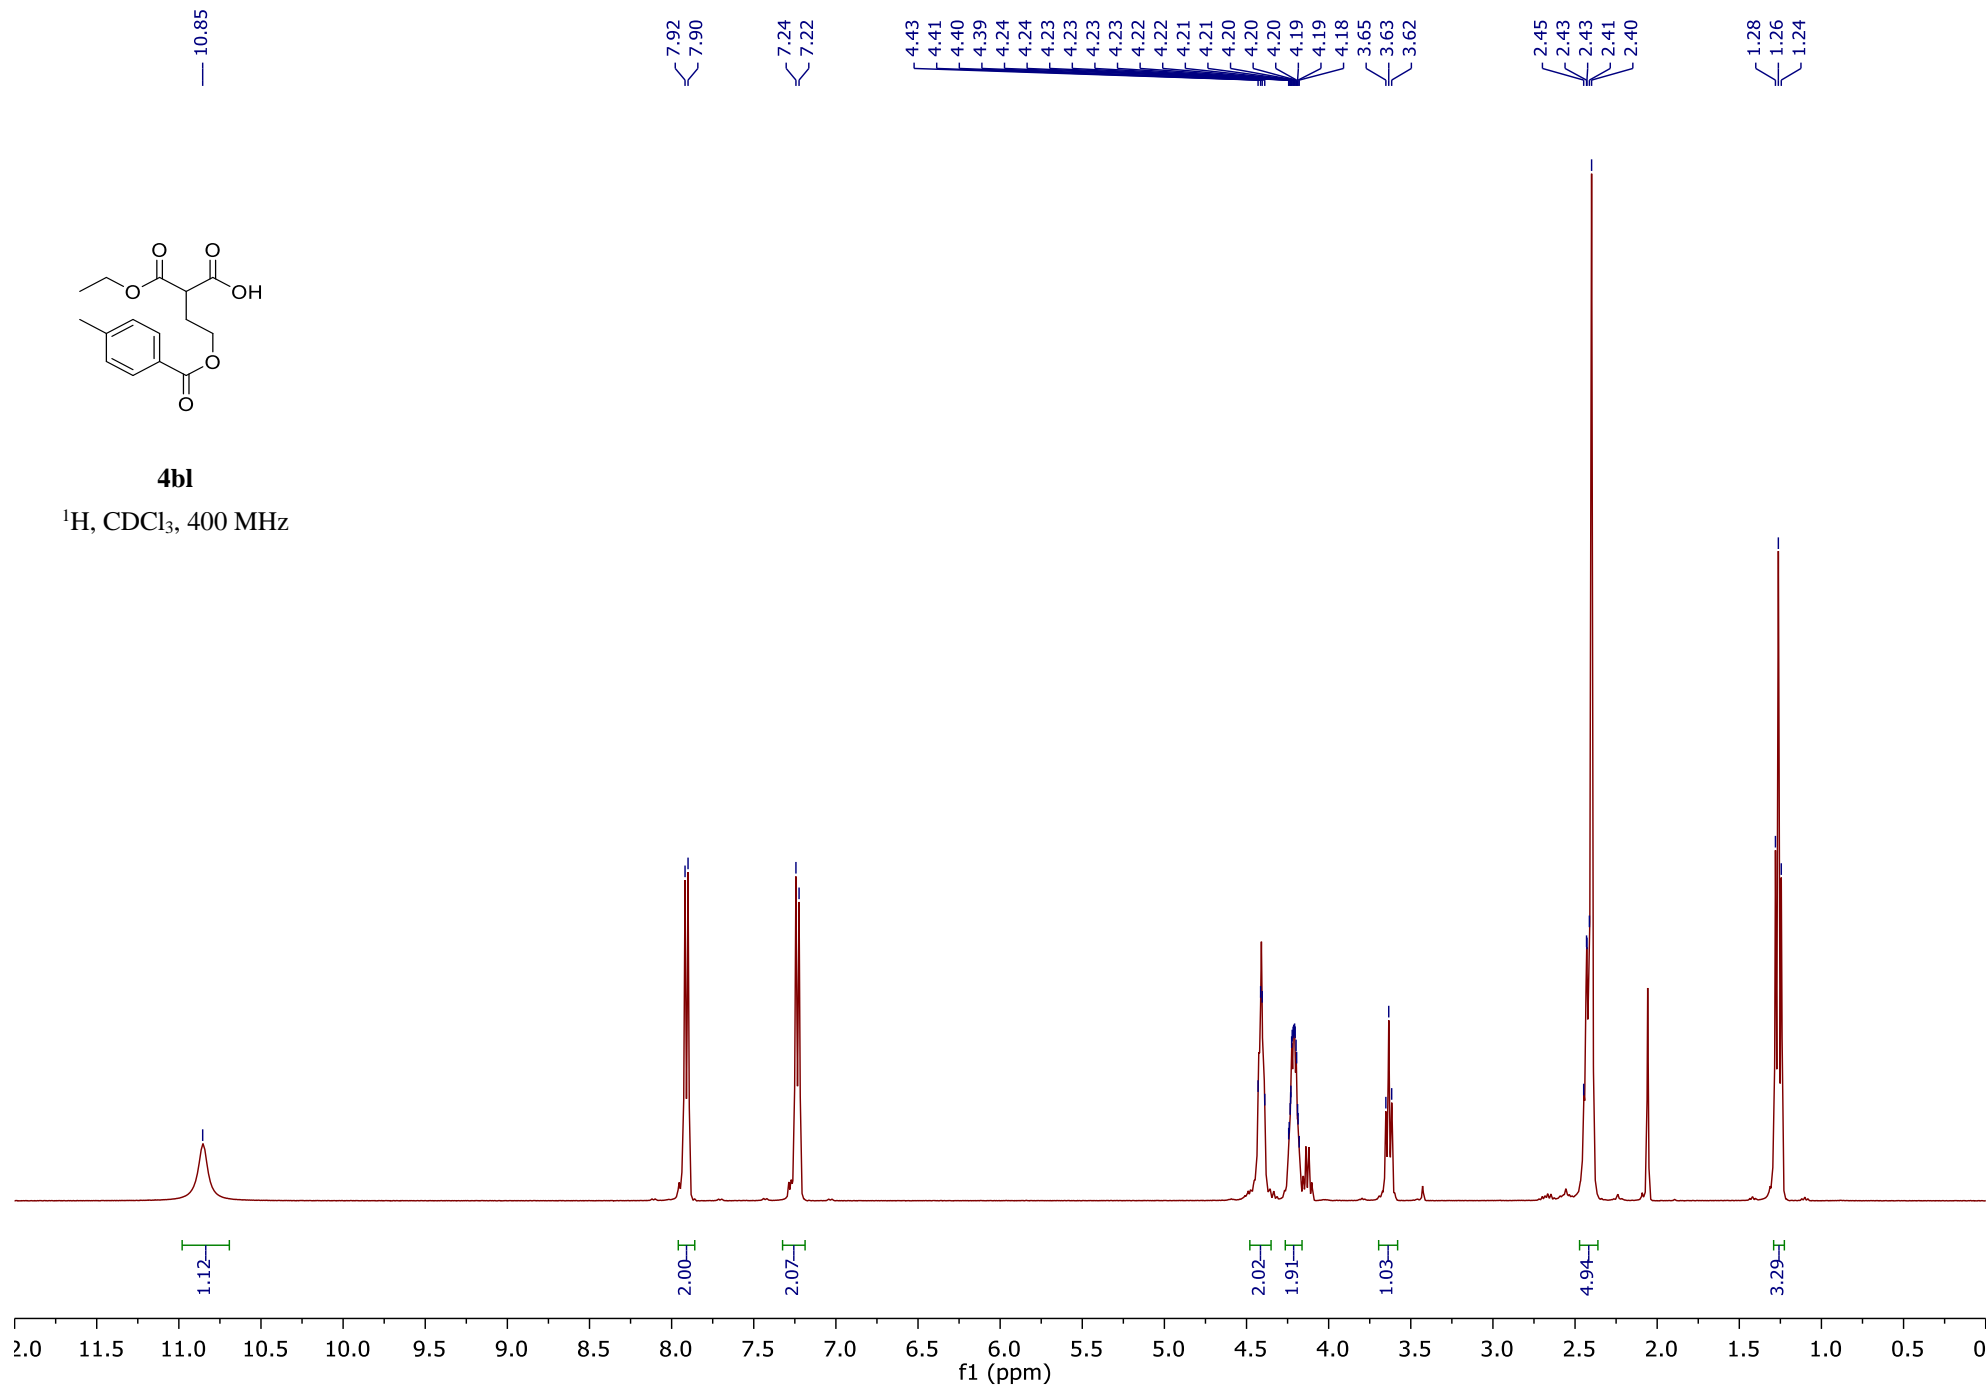

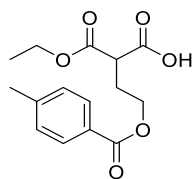

**4bl**

$^{13}\text{C}\{^1\text{H}\}$ ,  $\text{CDCl}_3$ , 100 MHz

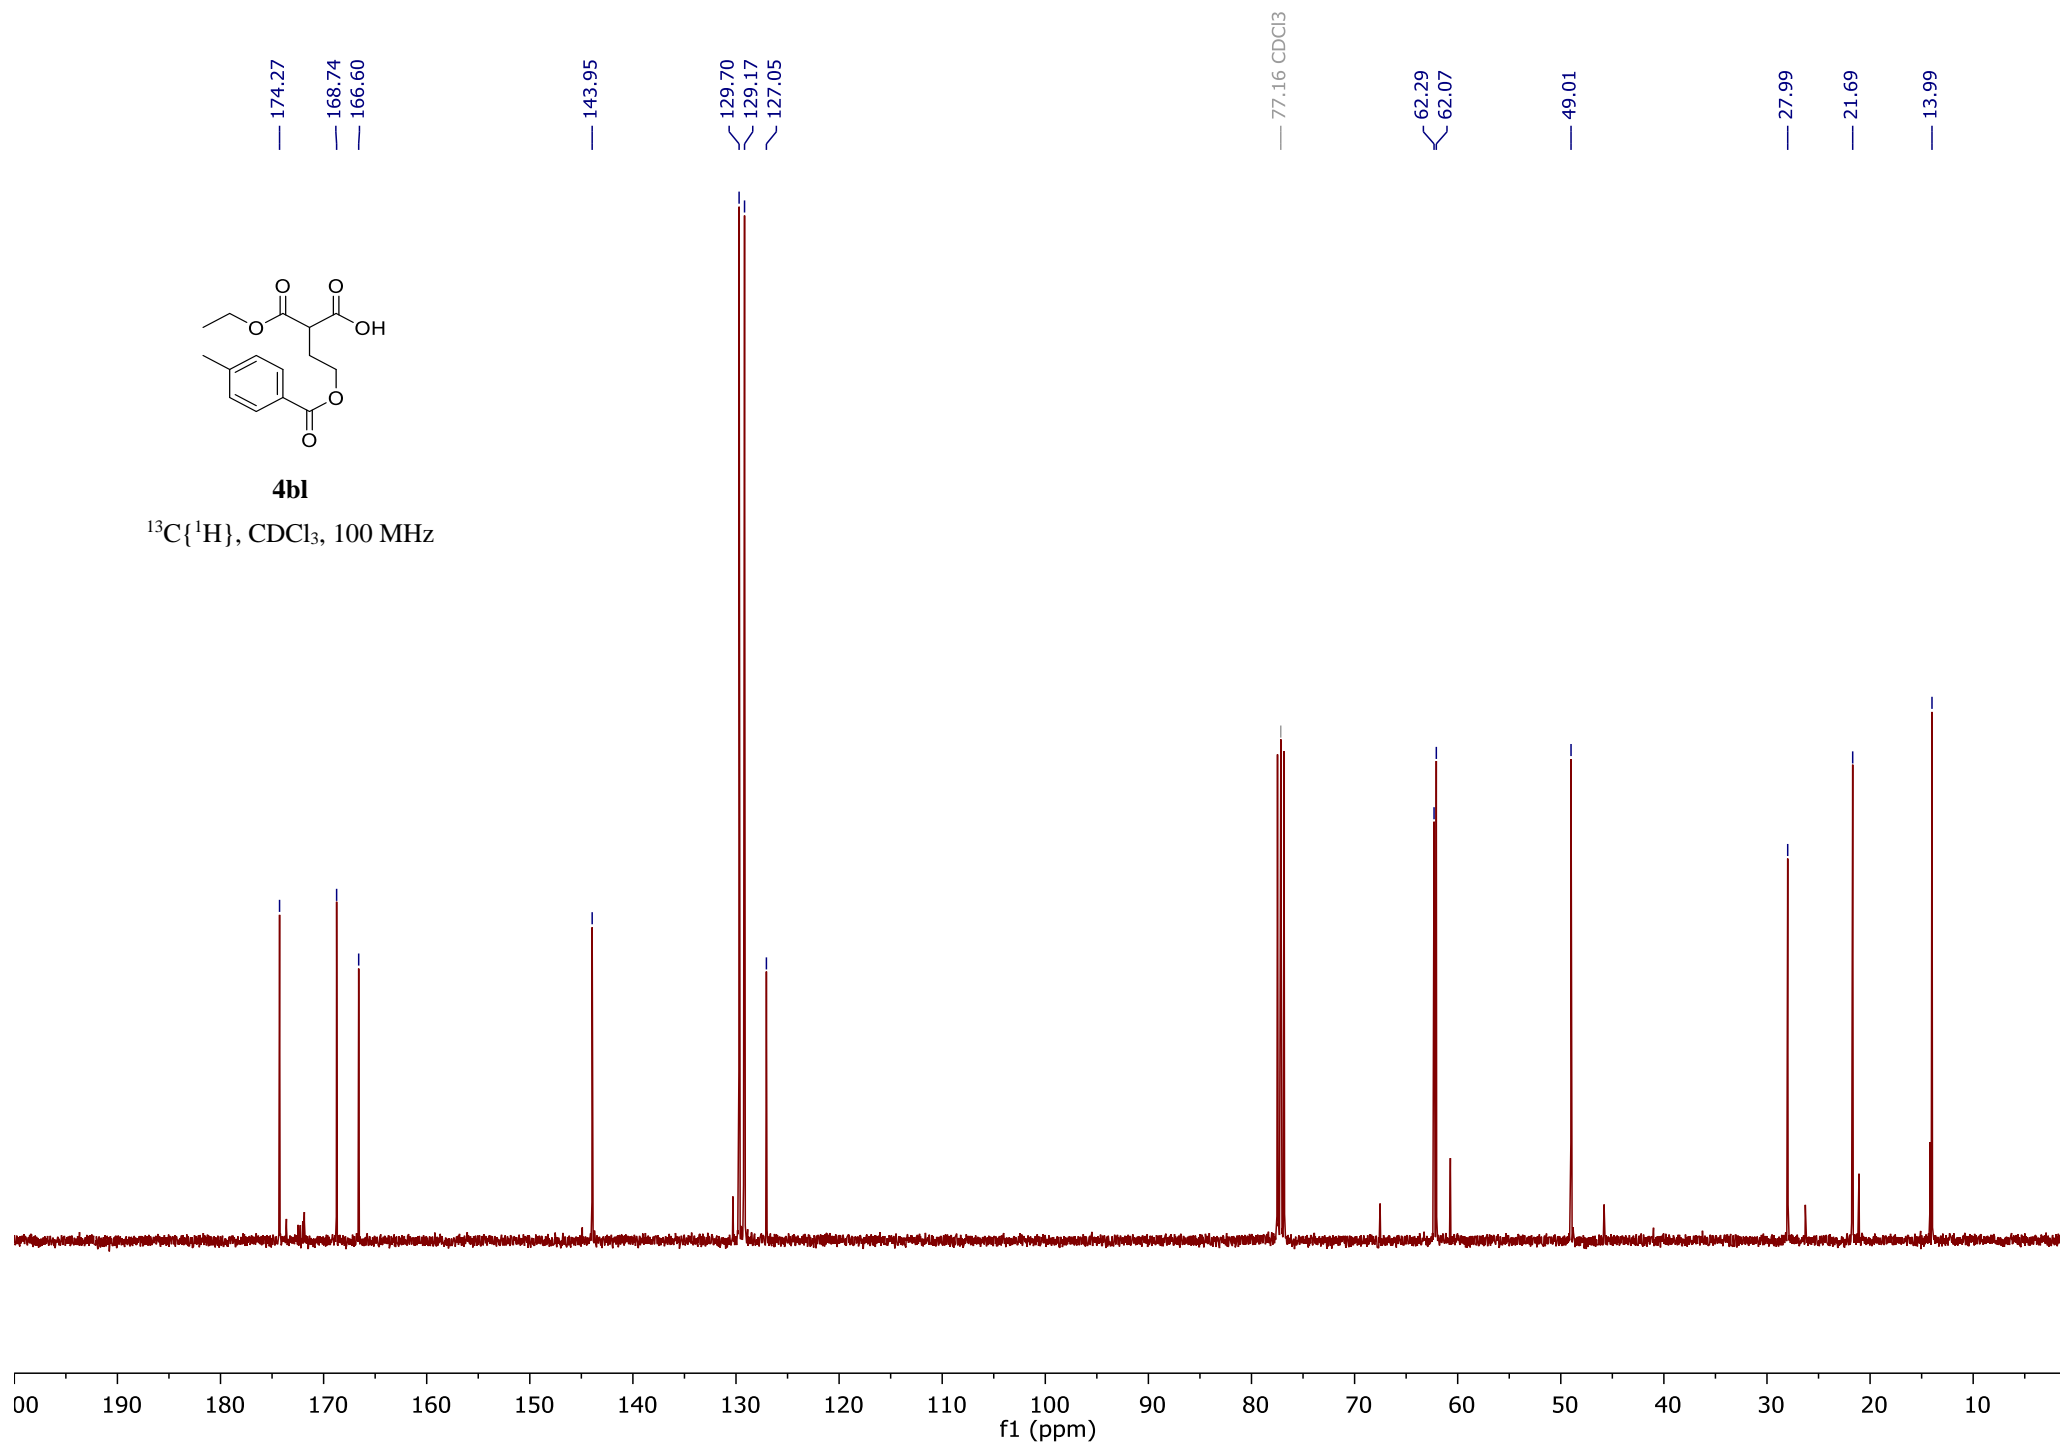

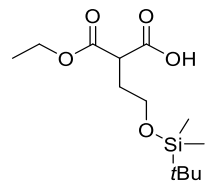

**4bm**

$^1\text{H}$ ,  $\text{CDCl}_3$ , 400 MHz

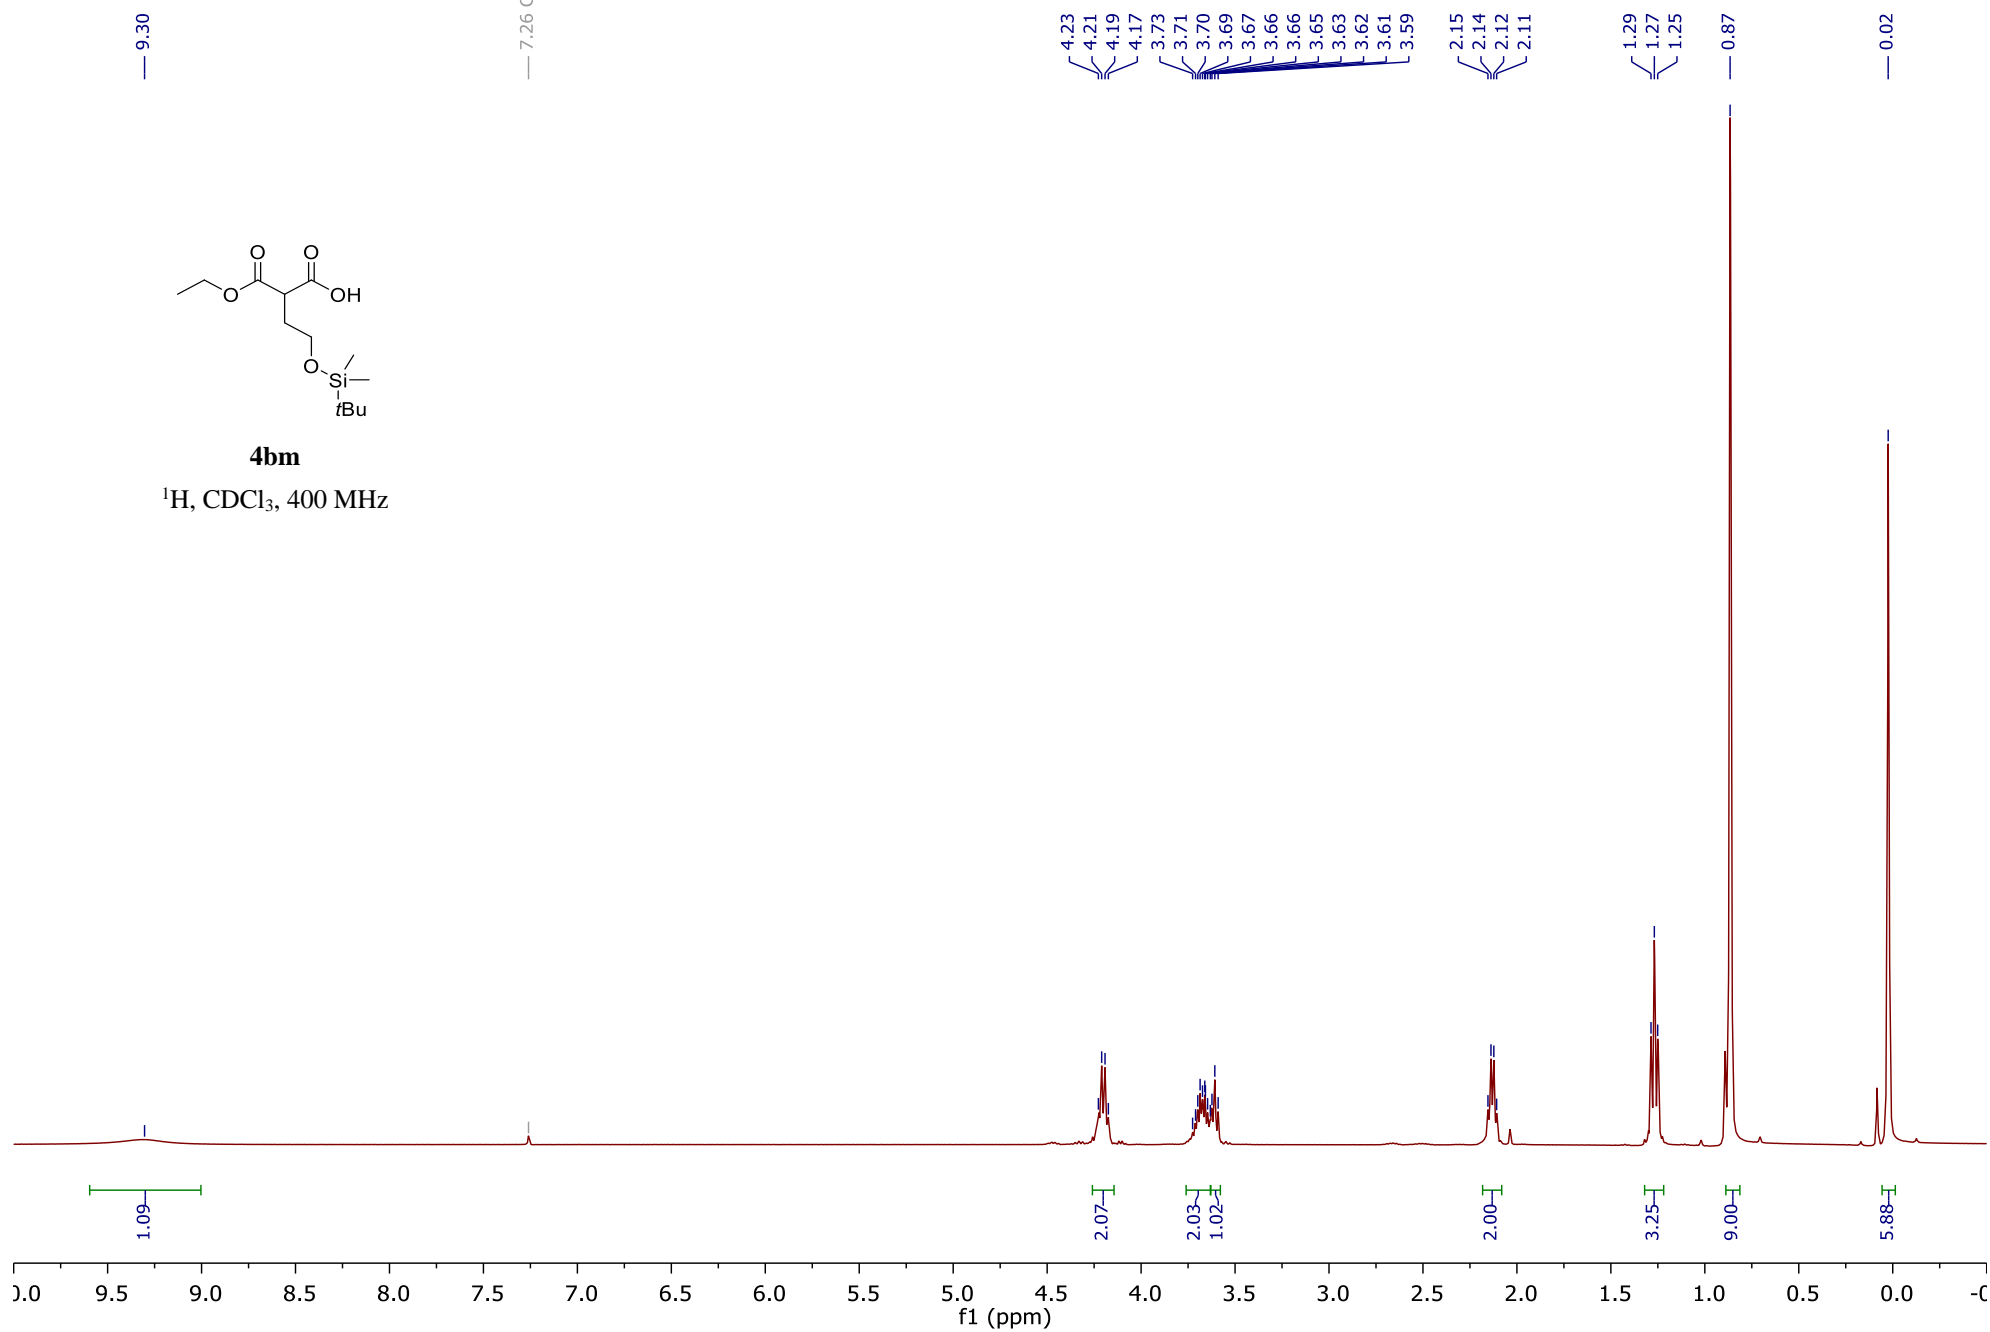

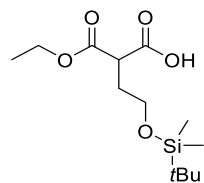

**4bm**

$^{13}\text{C}\{^1\text{H}\}$ ,  $\text{CDCl}_3$ , 100 MHz

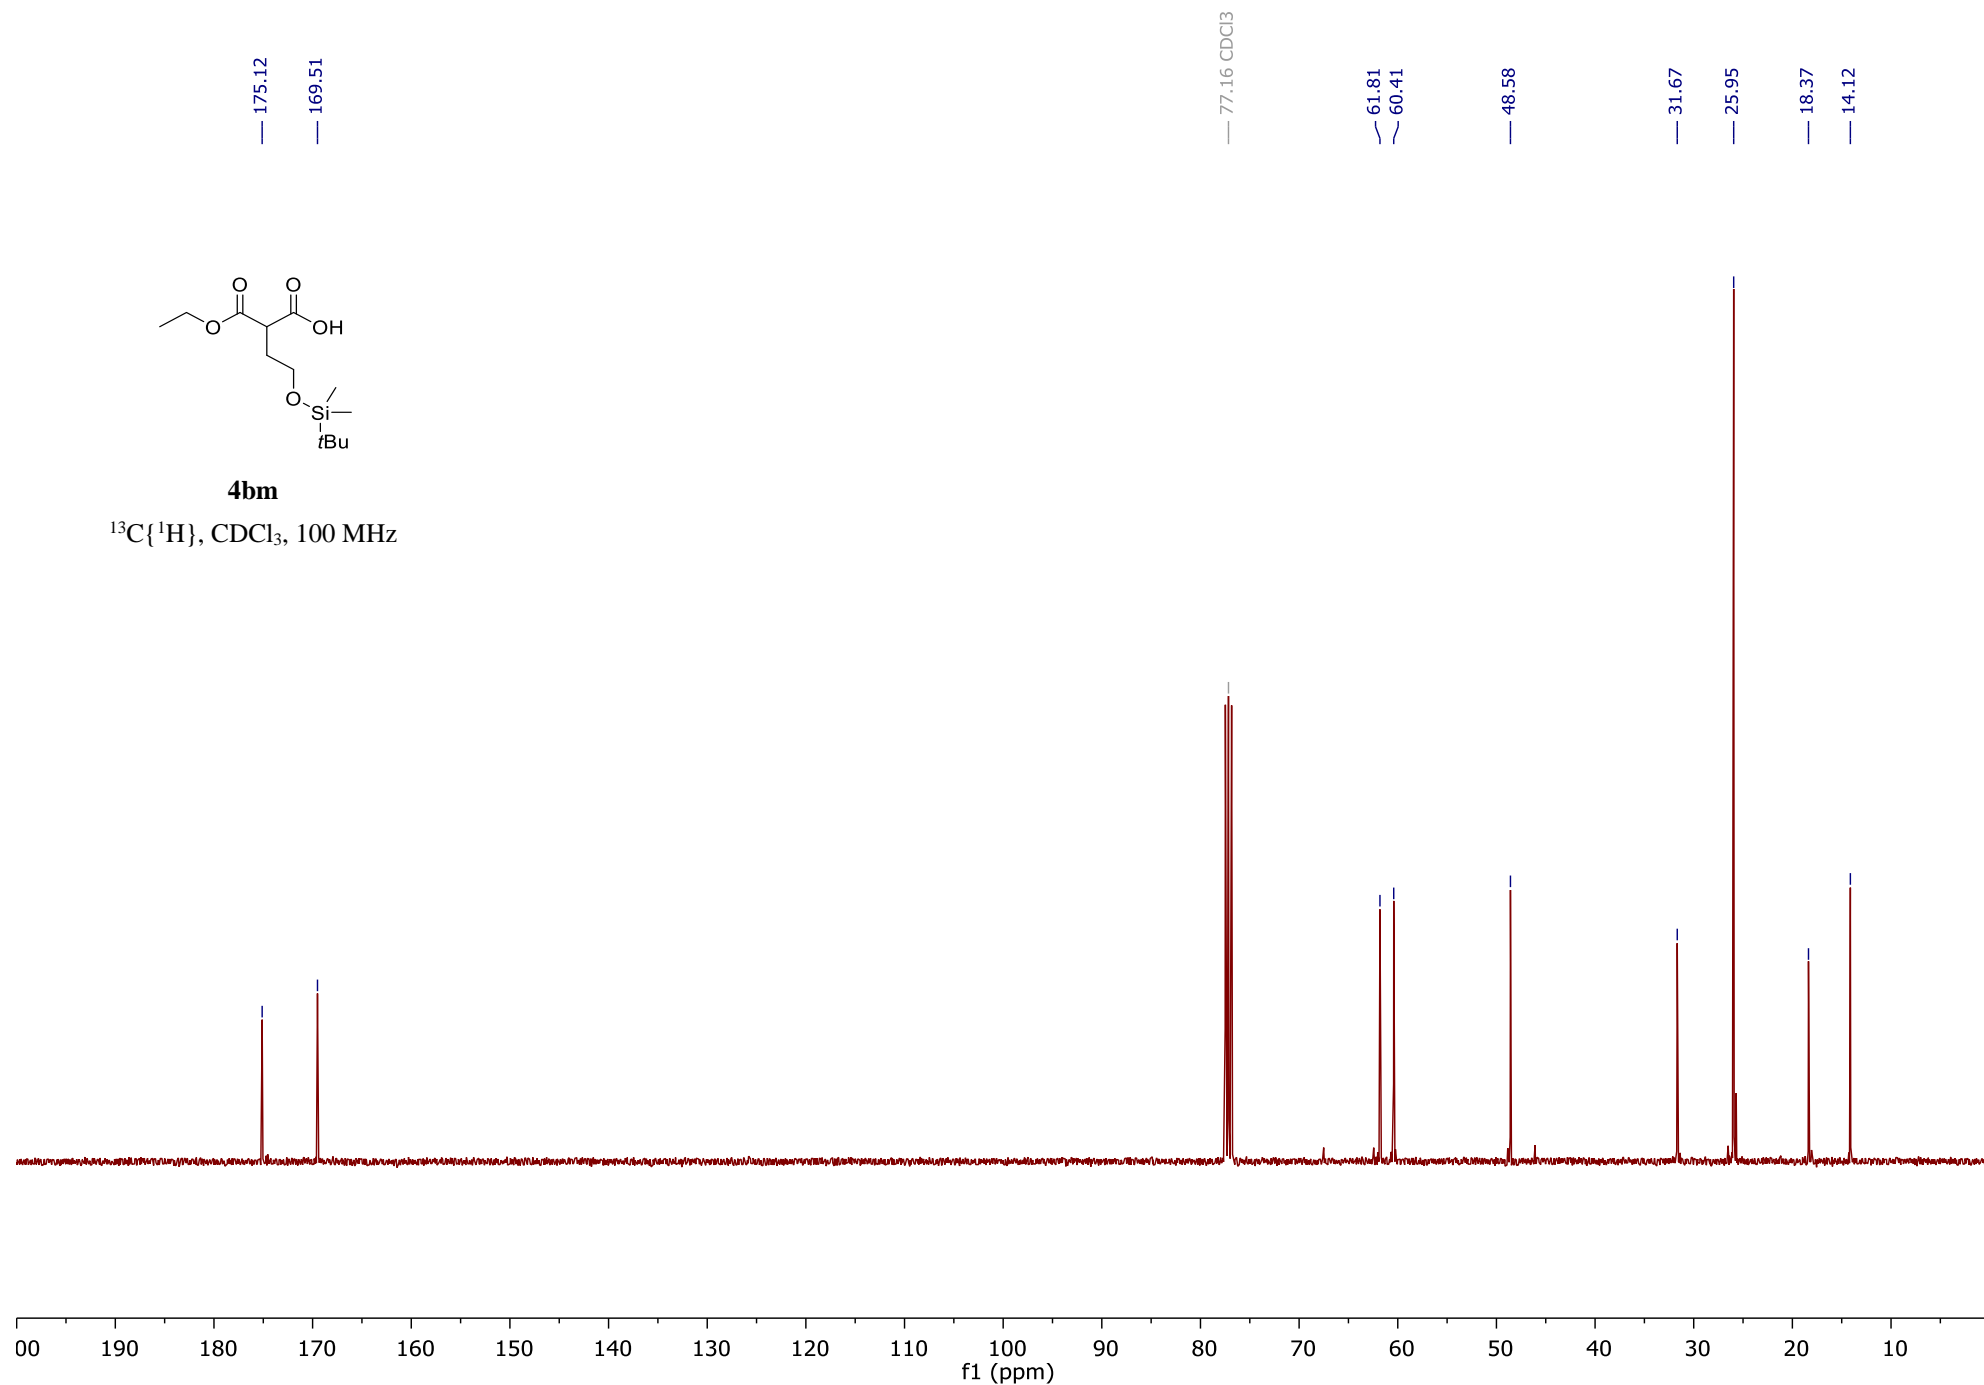

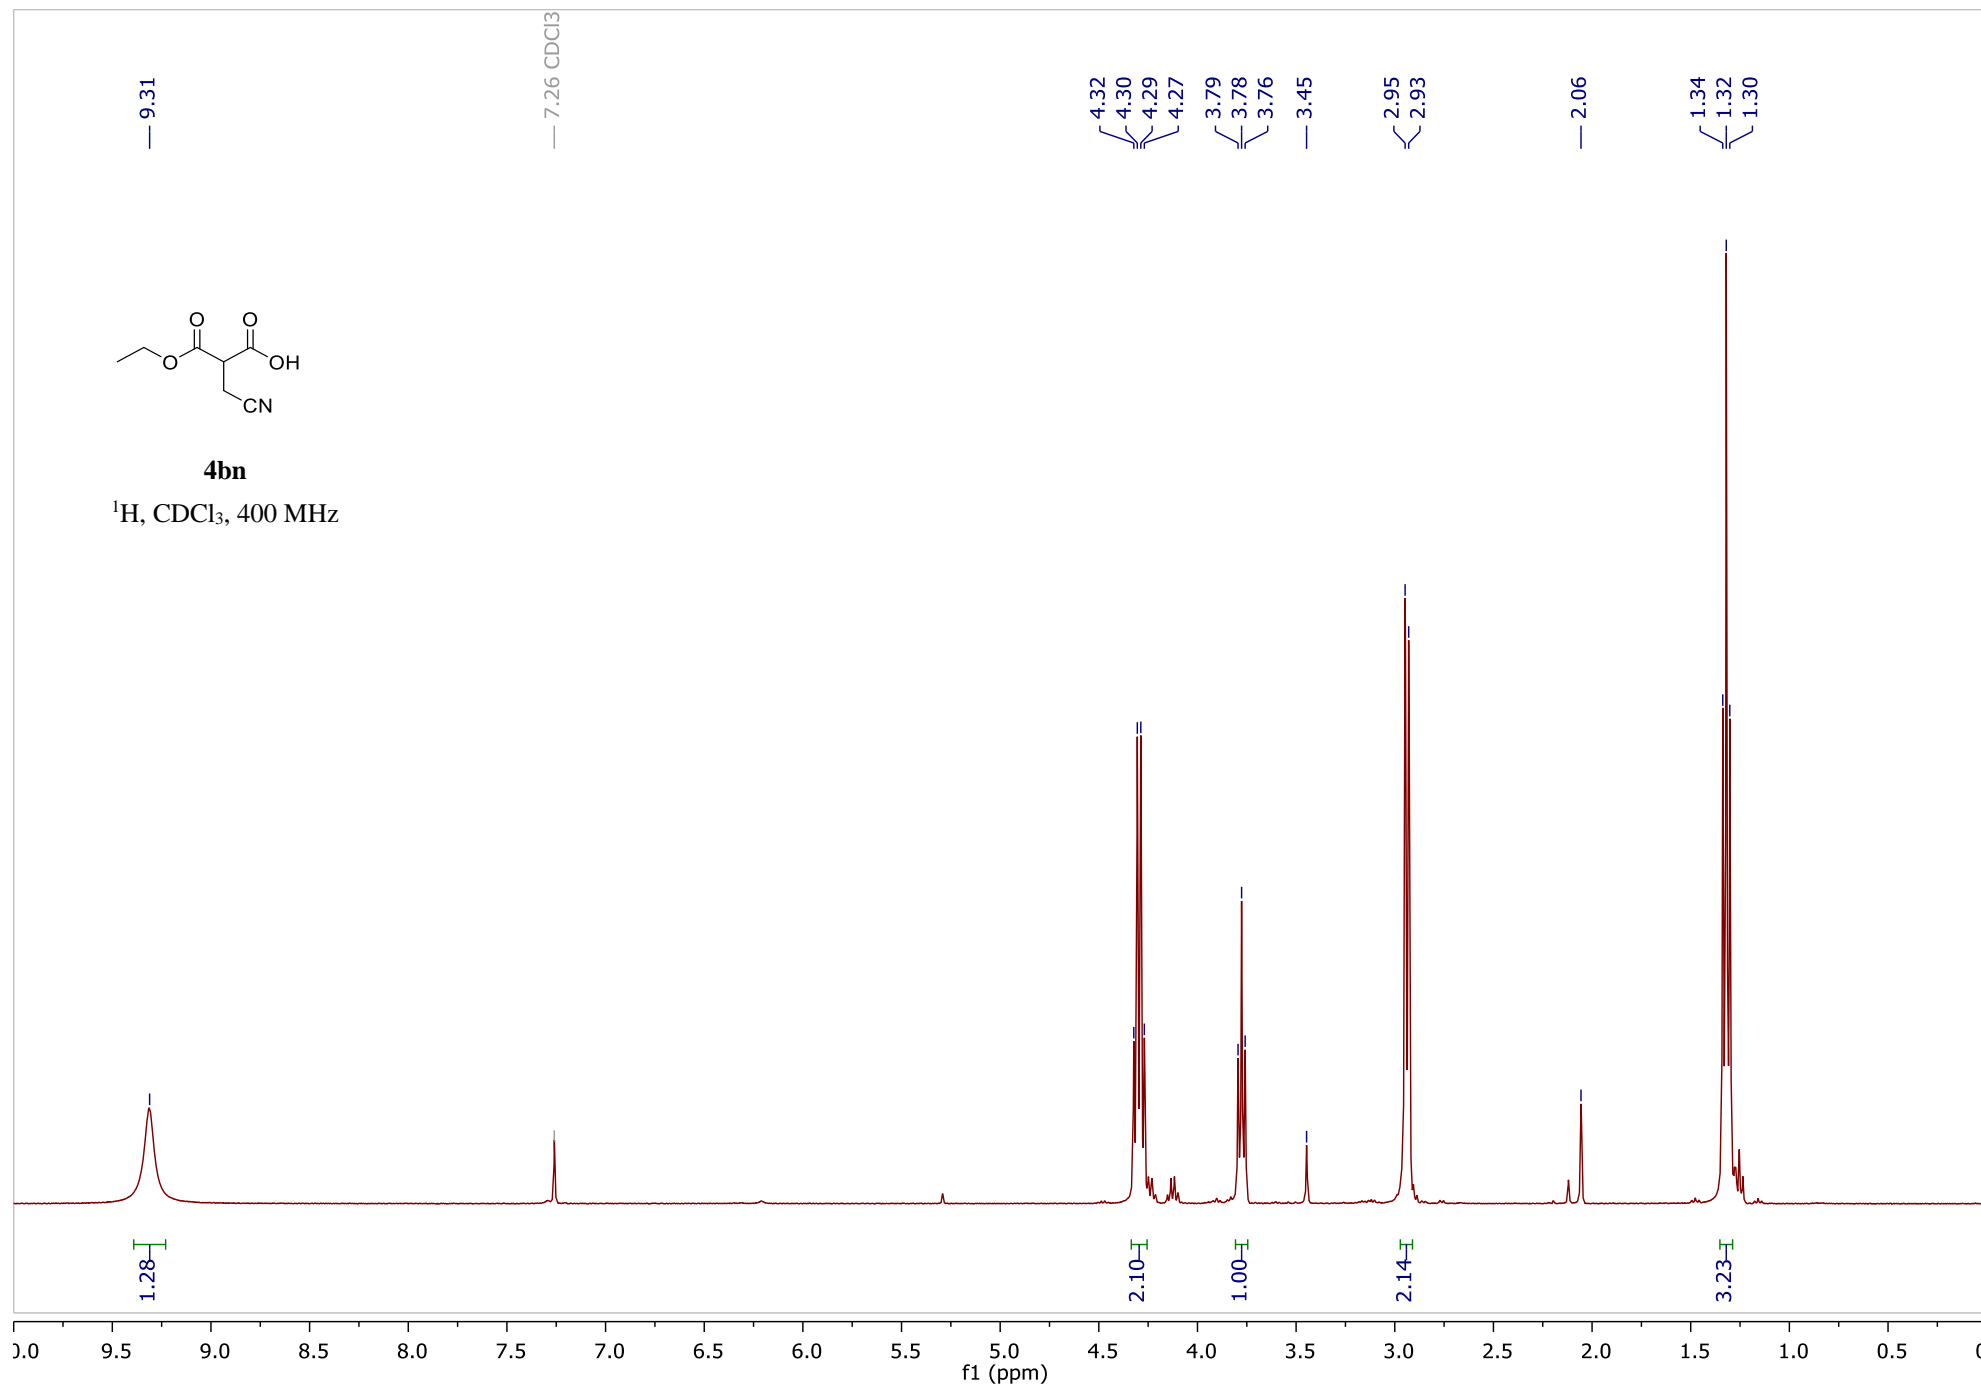

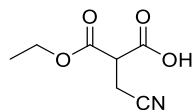

**4bn**

$^{13}\text{C}\{^1\text{H}\}$ ,  $\text{CDCl}_3$ , 100 MHz

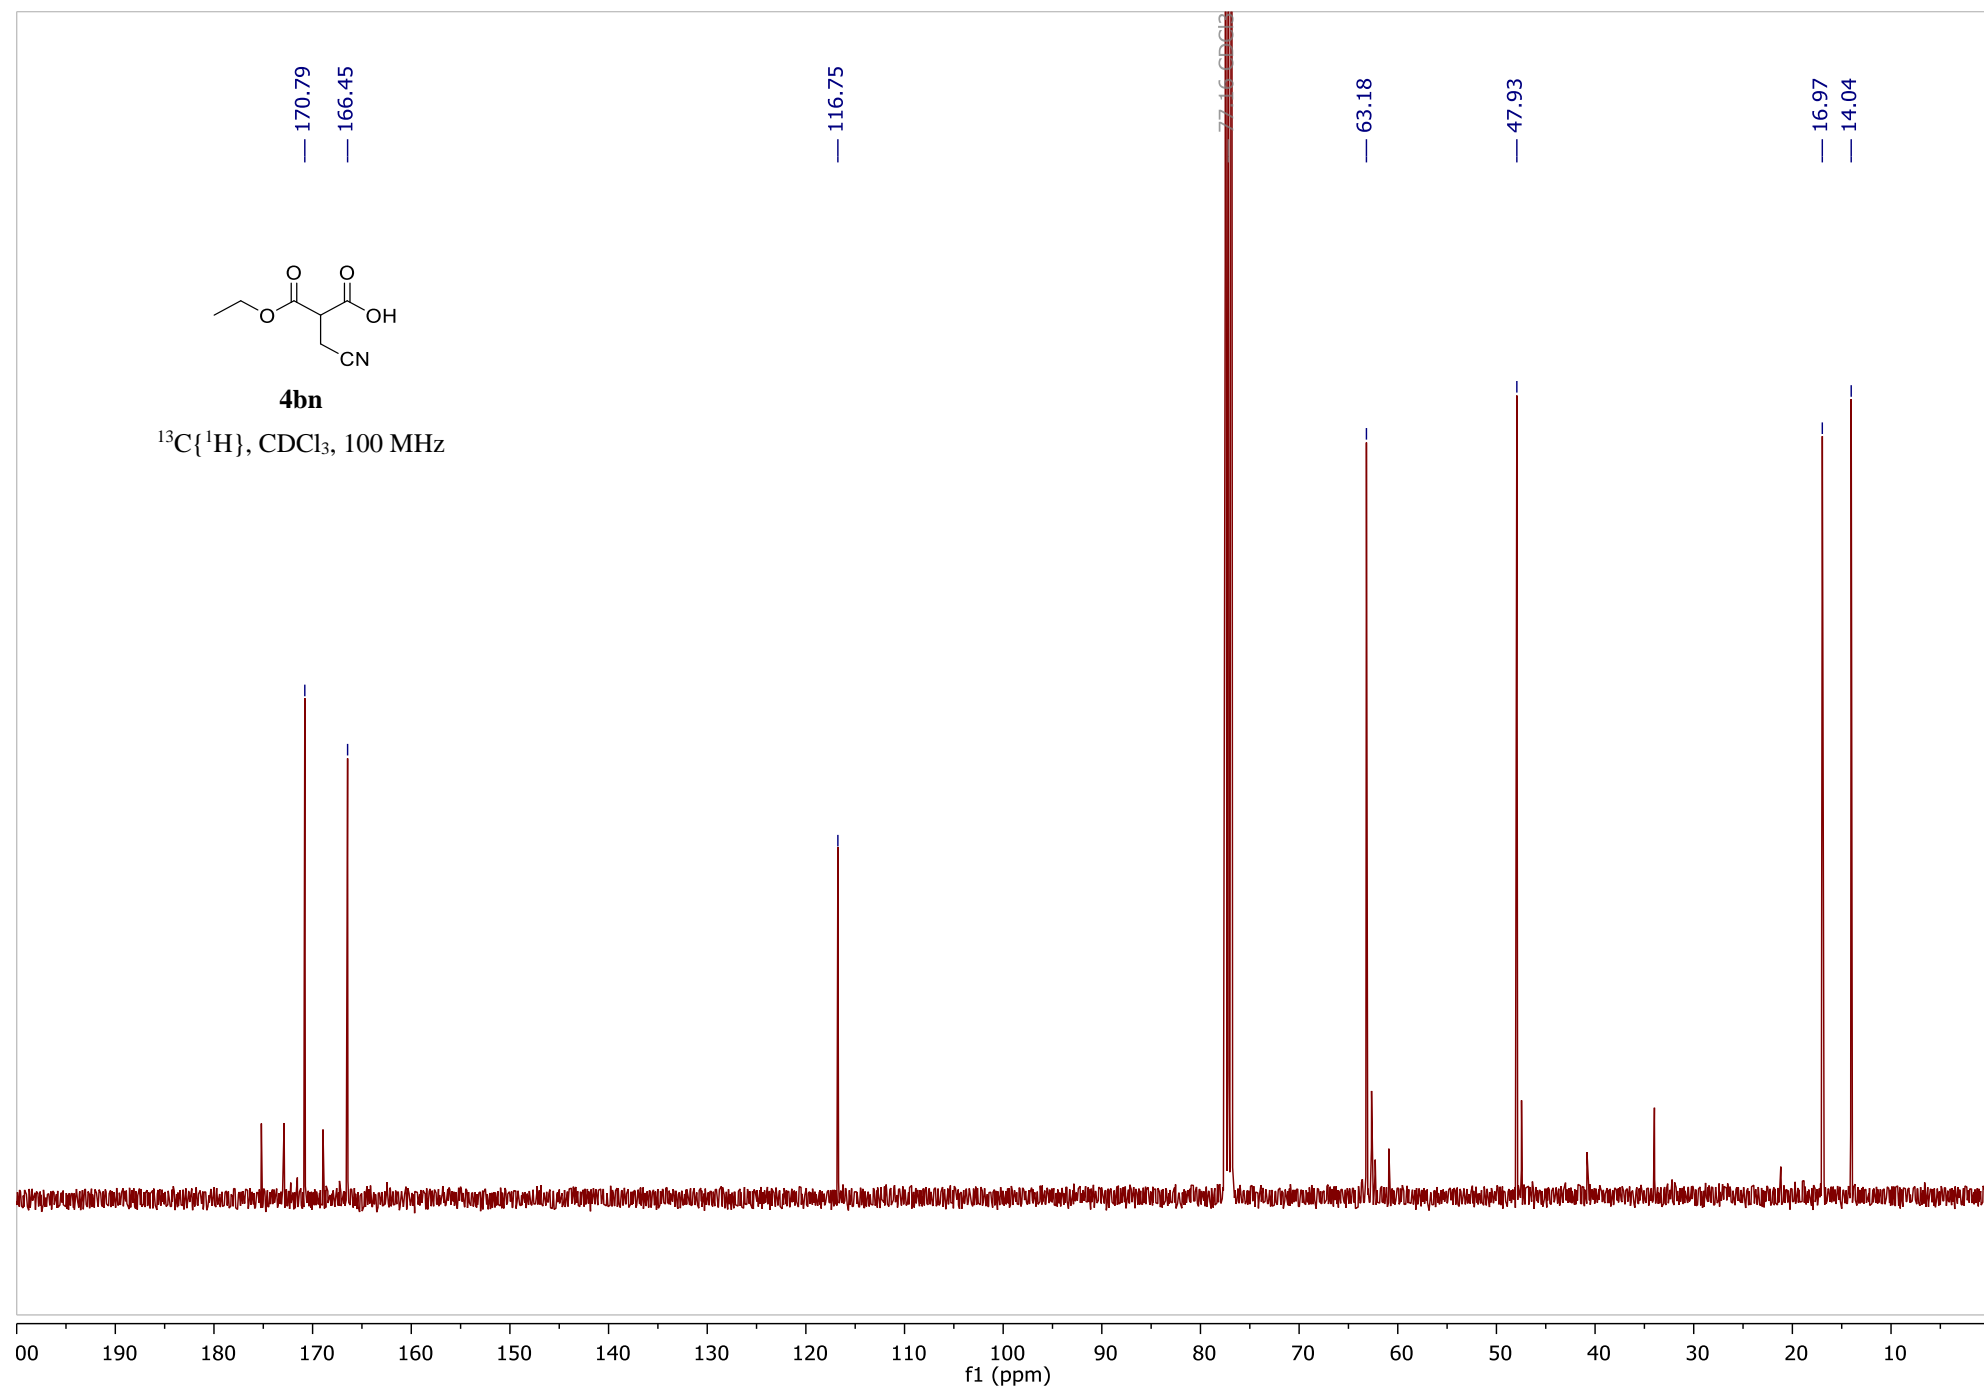

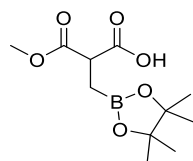

**4ao**

$^1\text{H}$ ,  $\text{CDCl}_3$ , 400 MHz

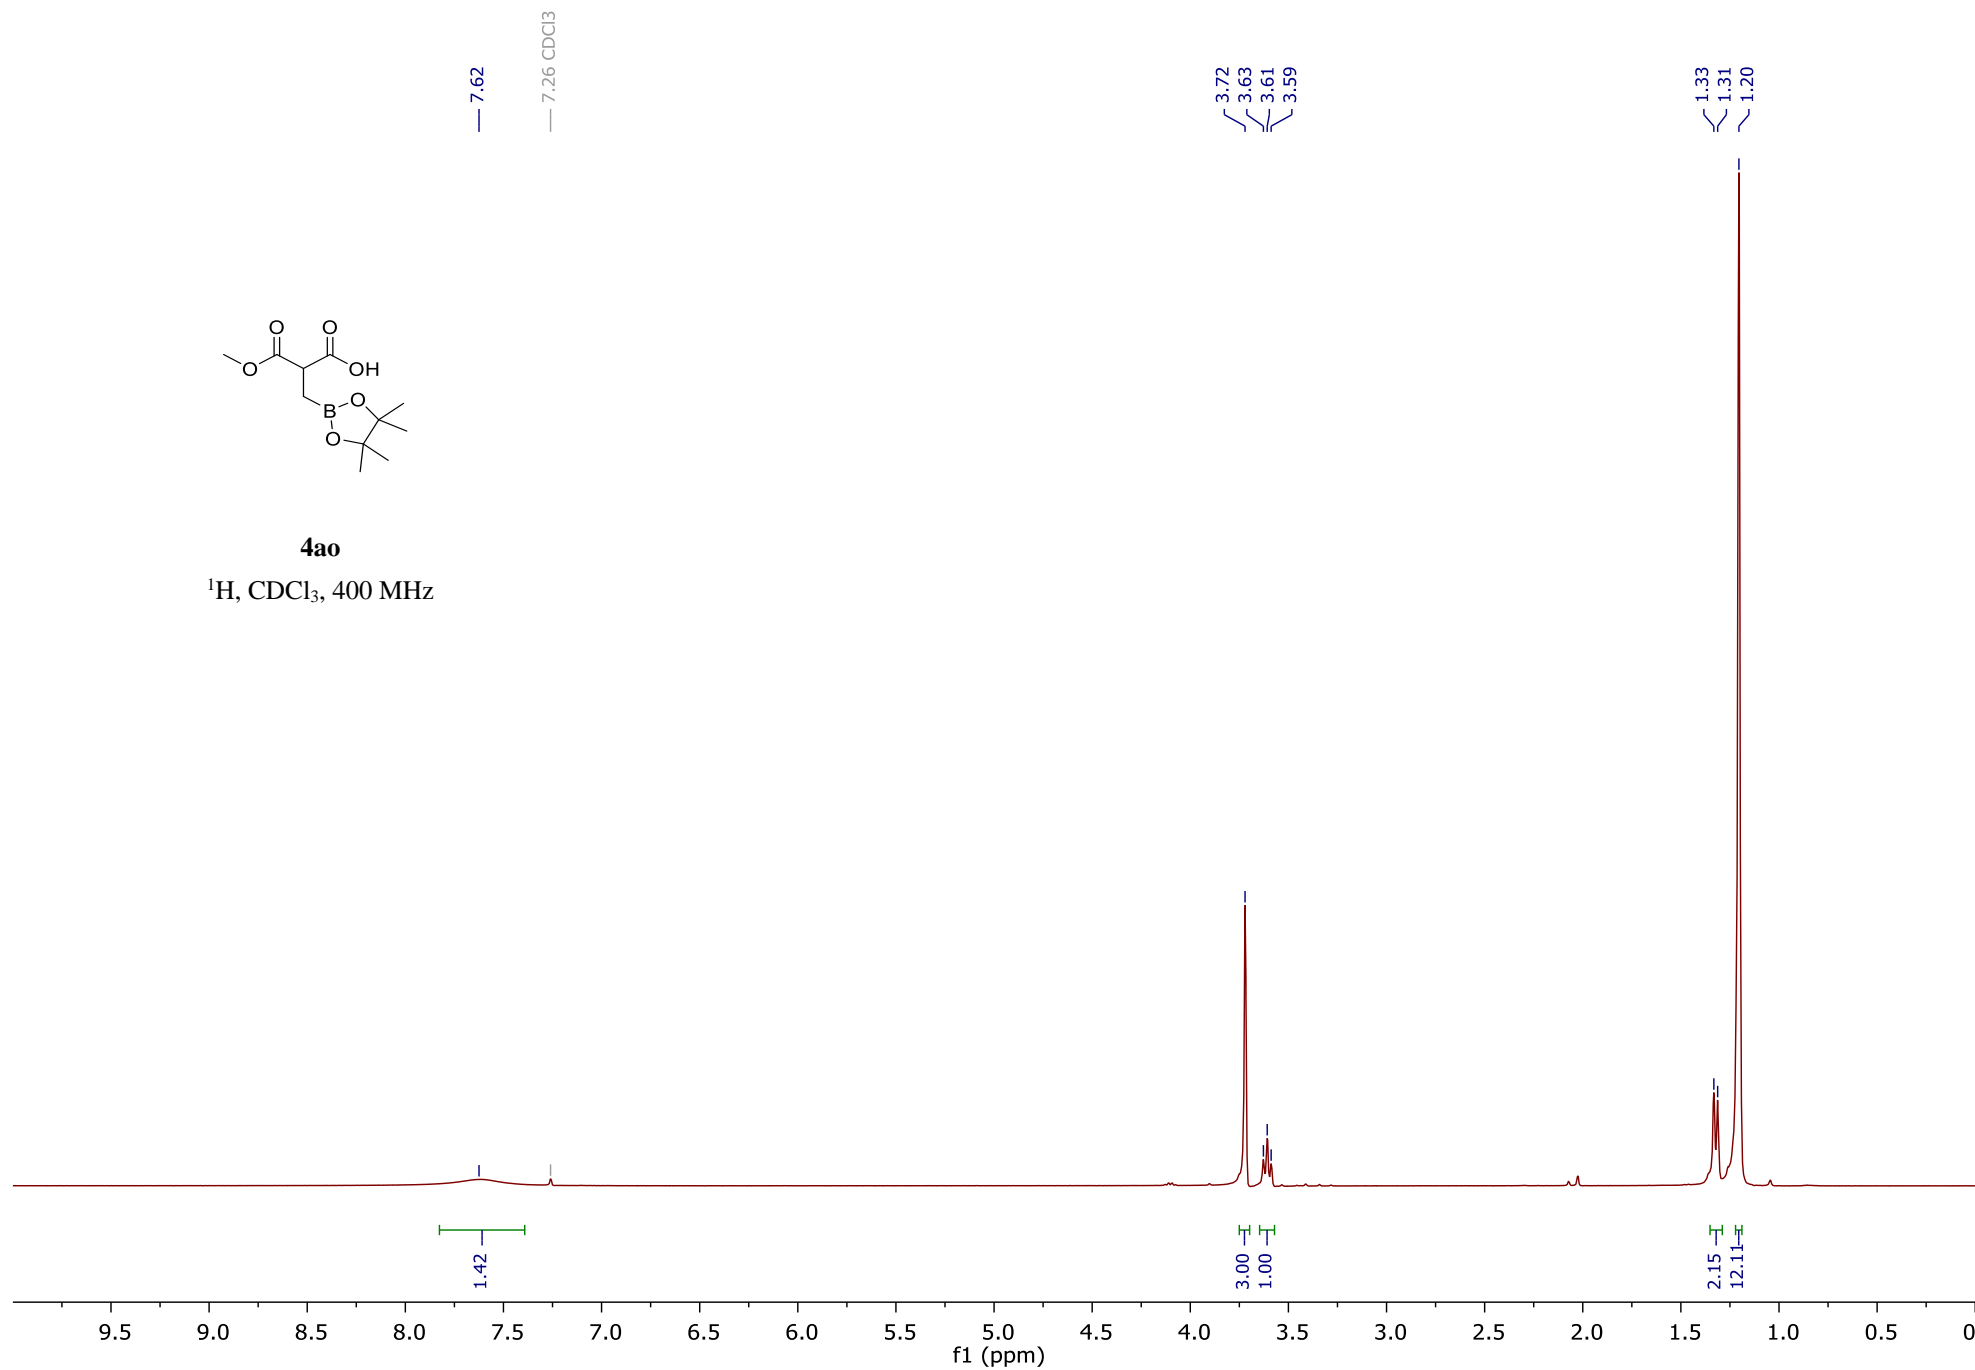



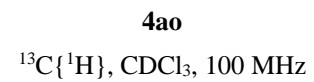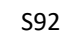

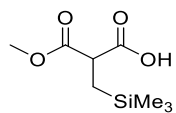

**4ap**

$^1\text{H}$ ,  $\text{CDCl}_3$ , 400 MHz

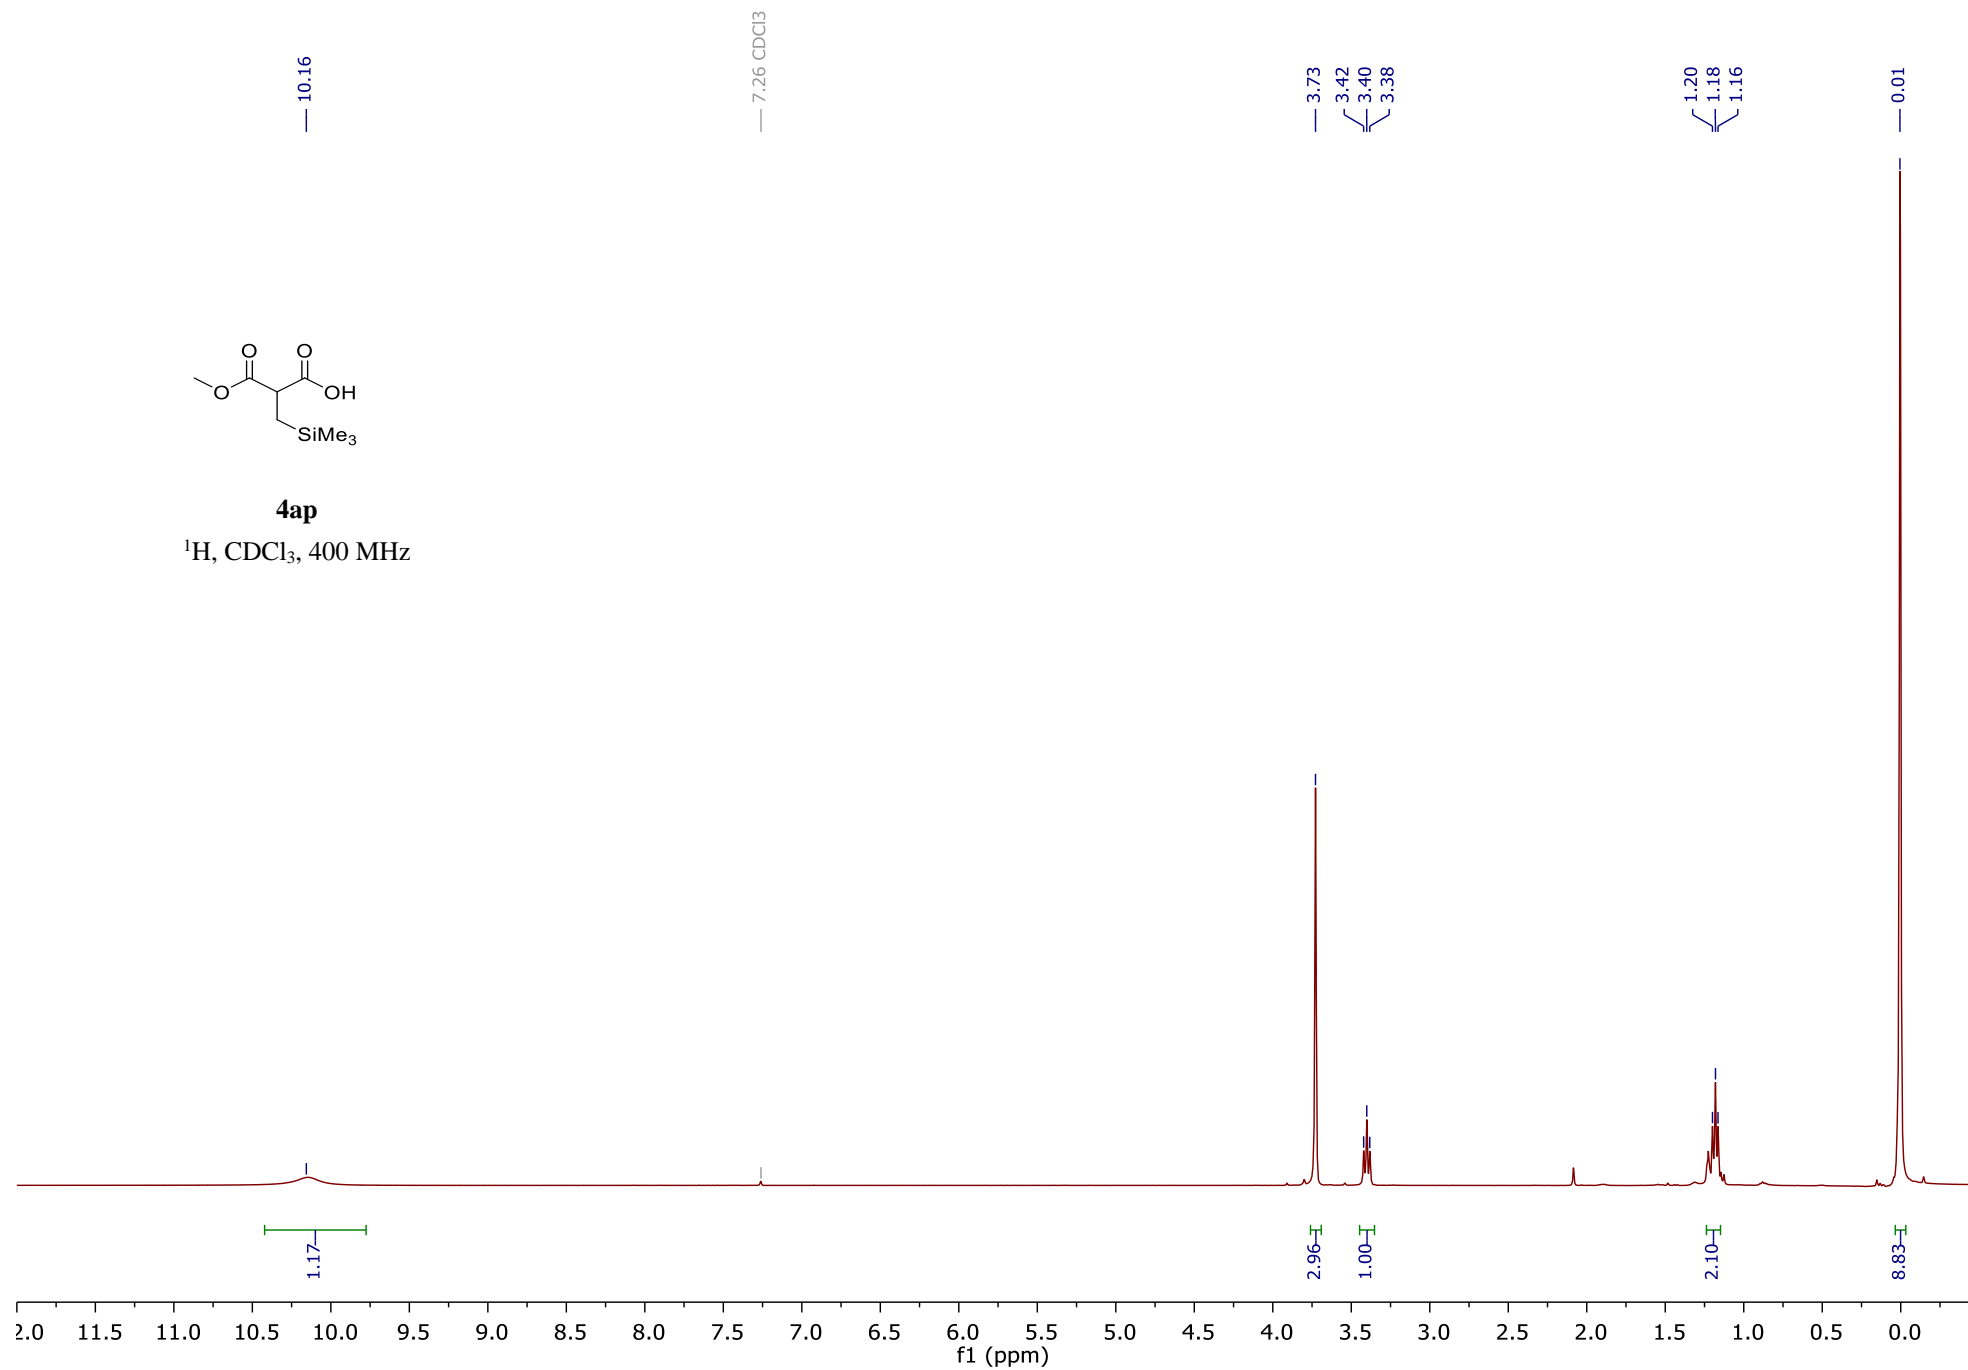

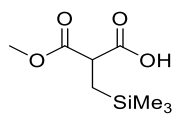

**4ap**

$^{13}\text{C}\{^1\text{H}\}$ ,  $\text{CDCl}_3$ , 100 MHz

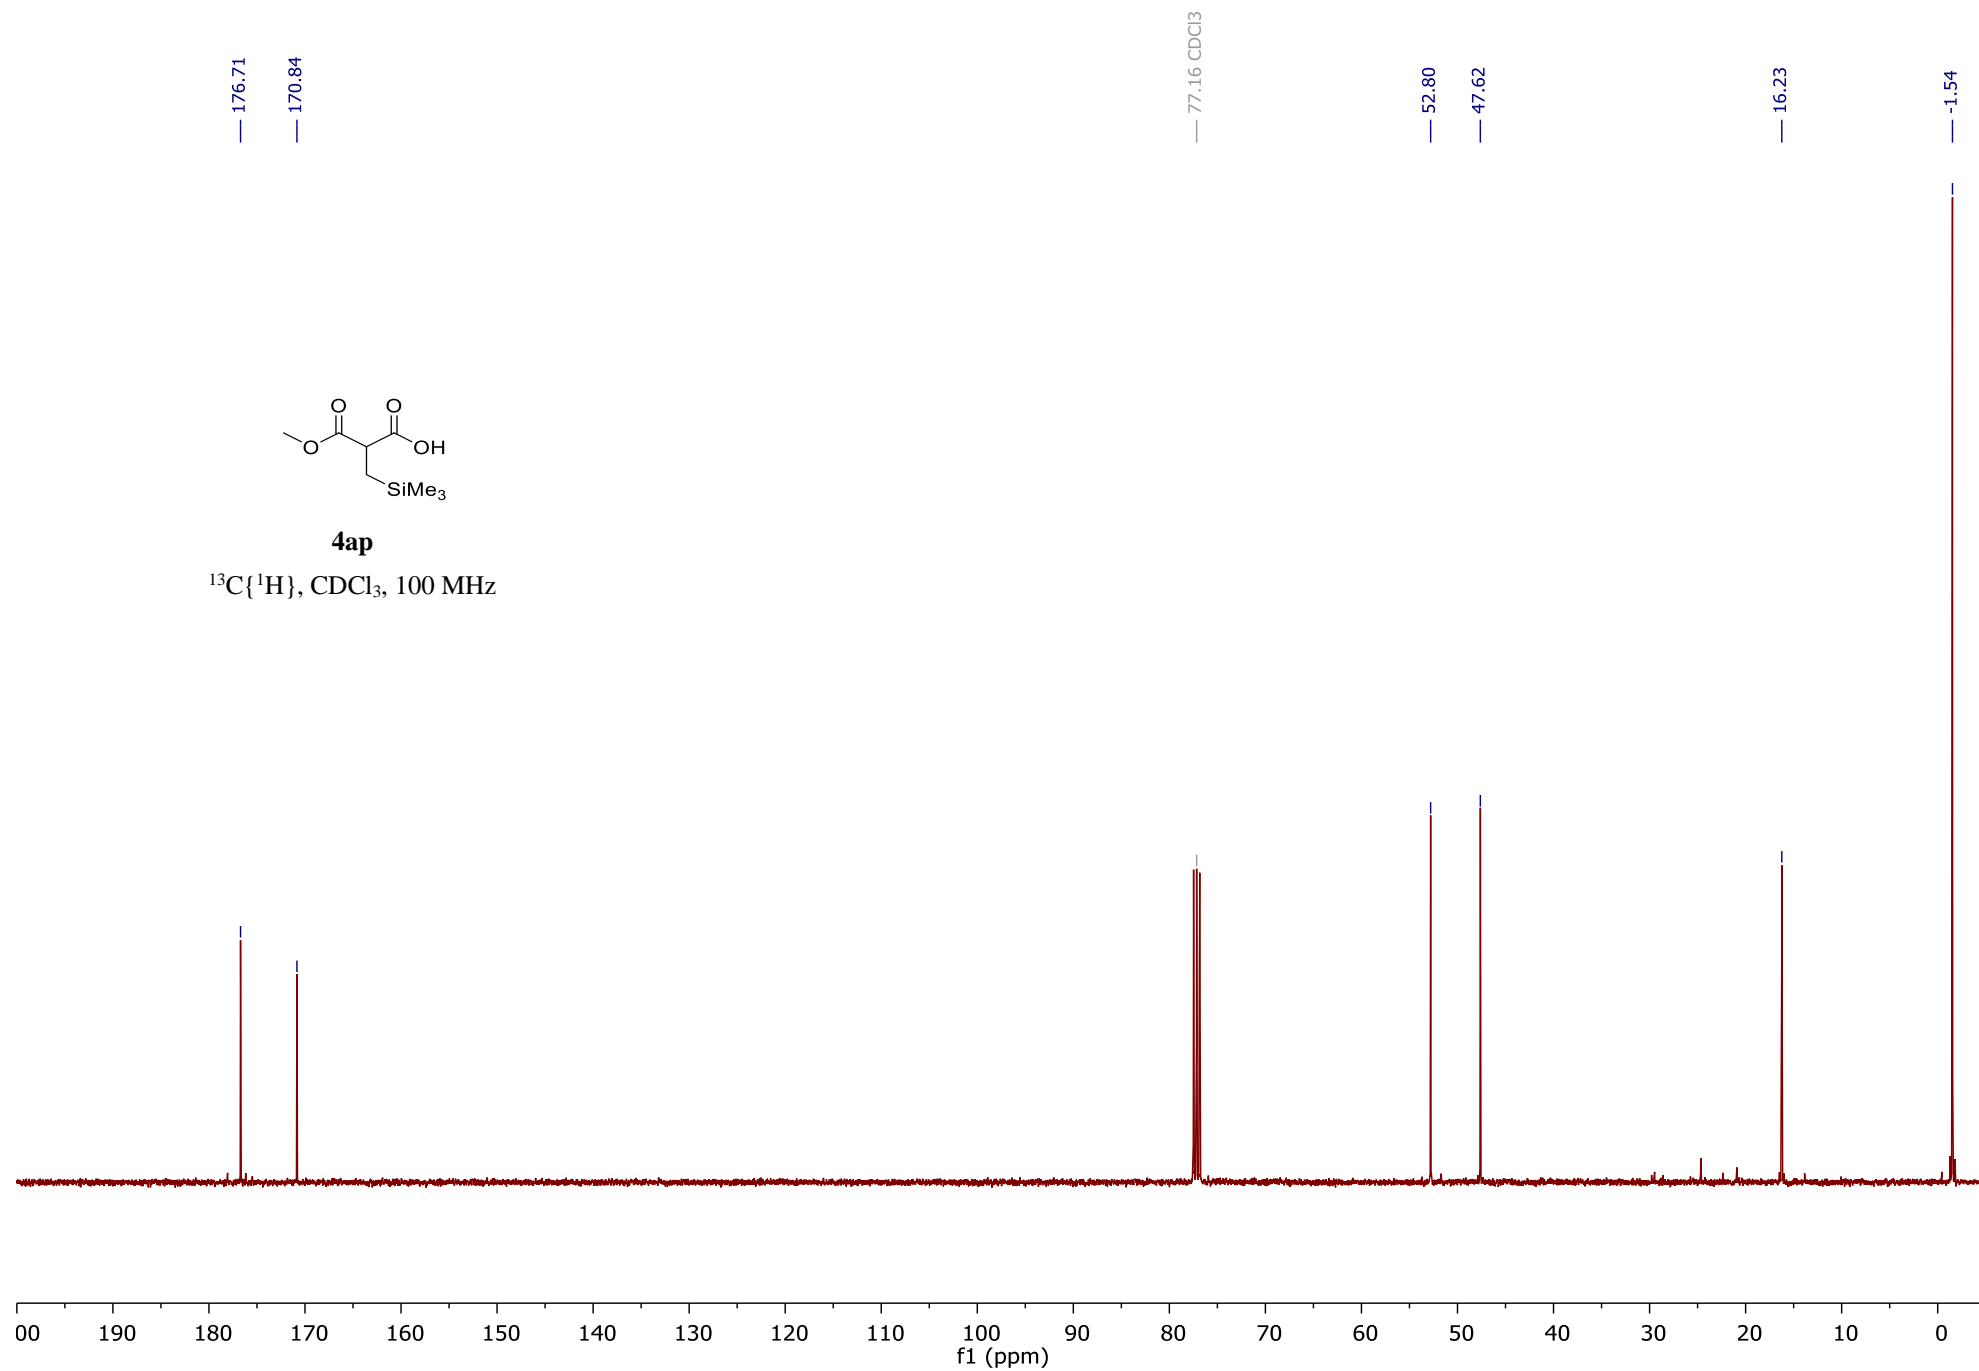

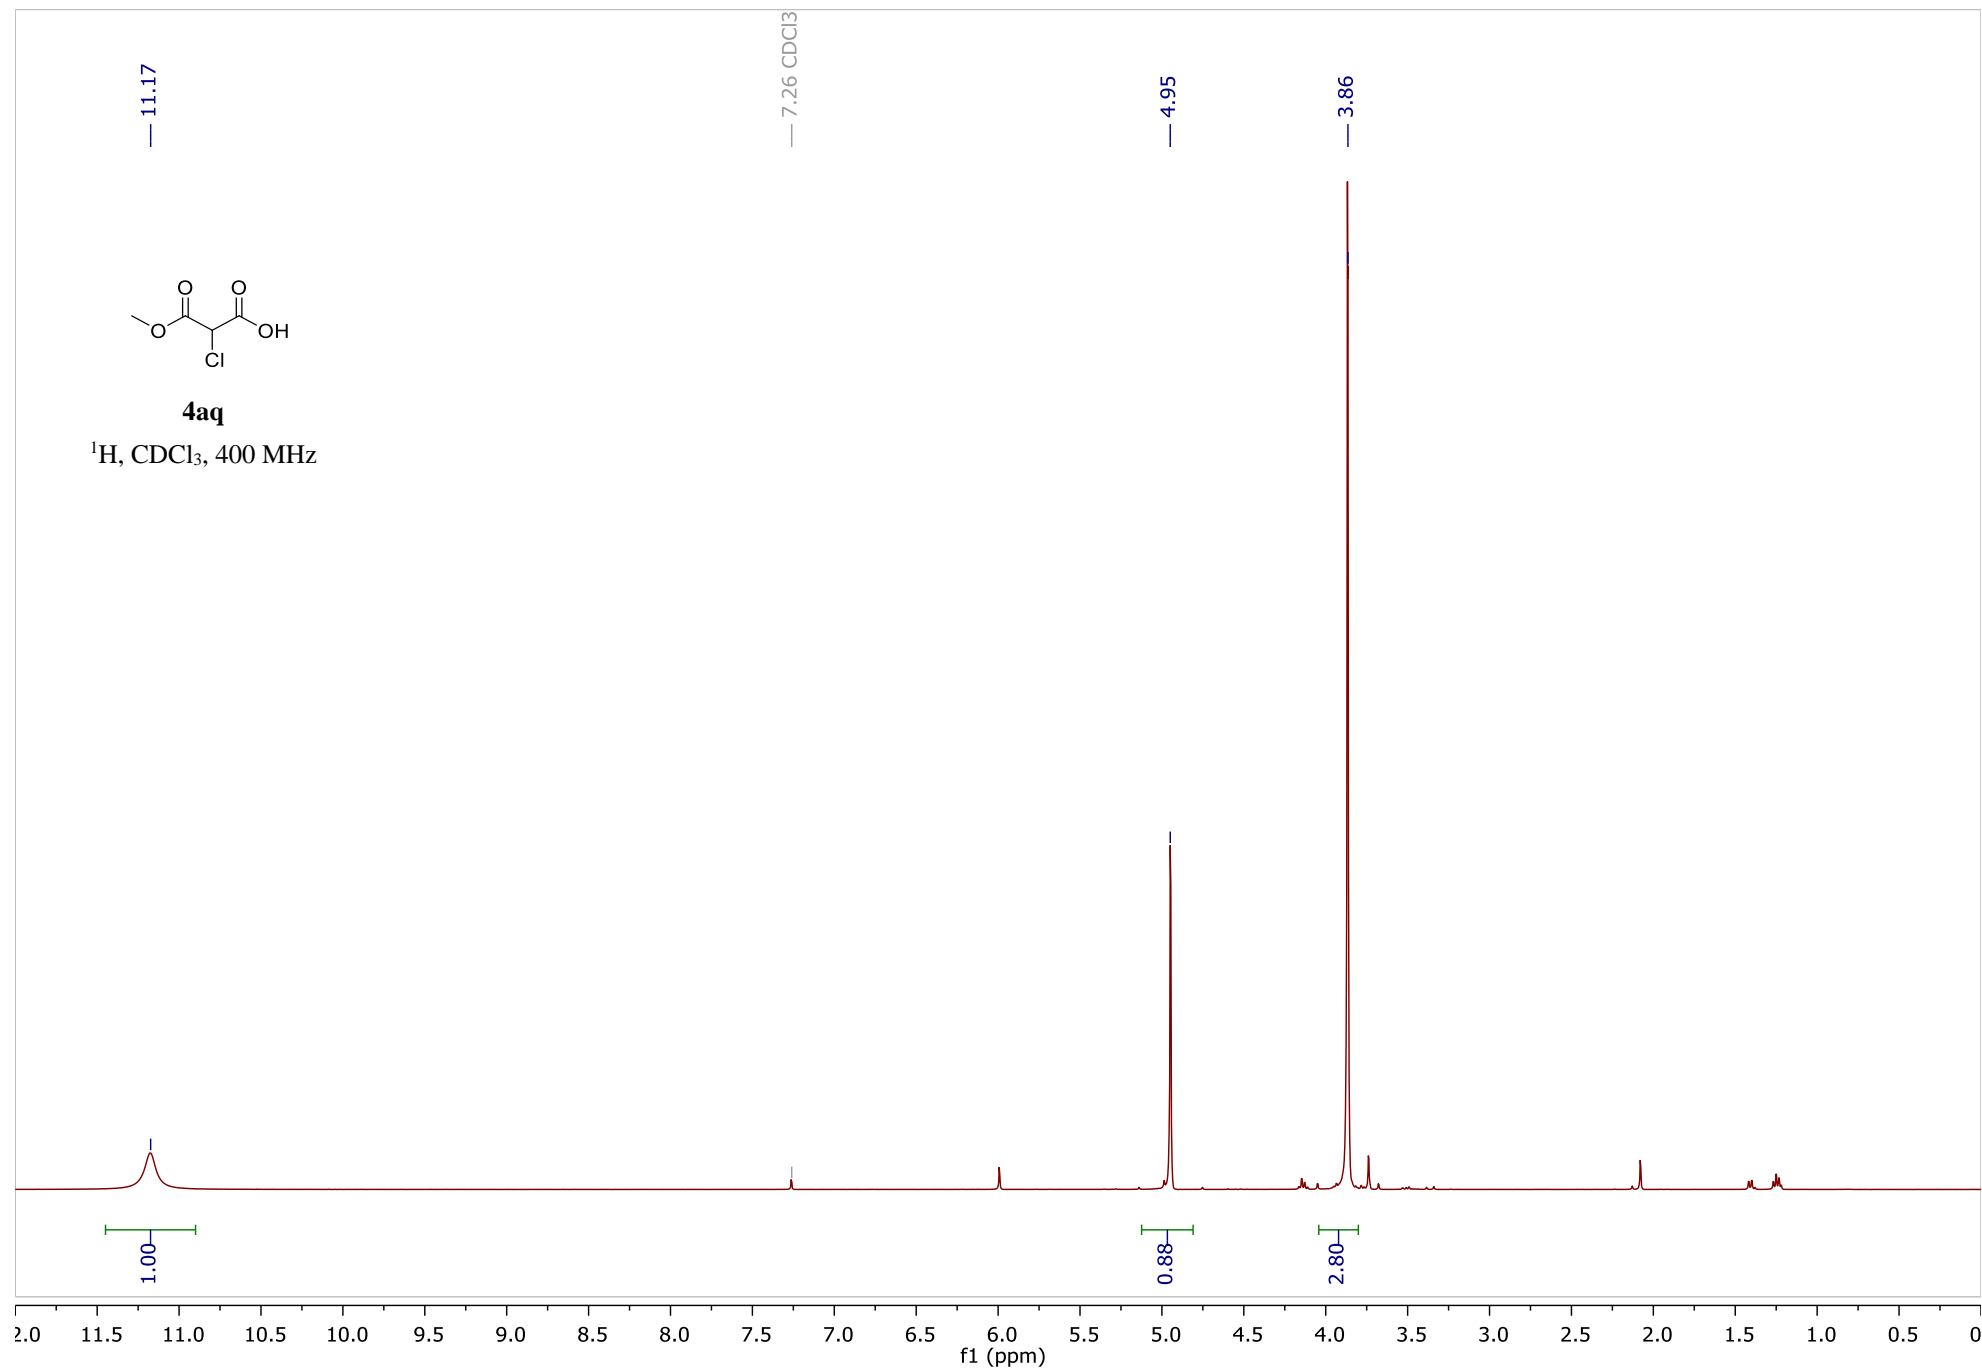

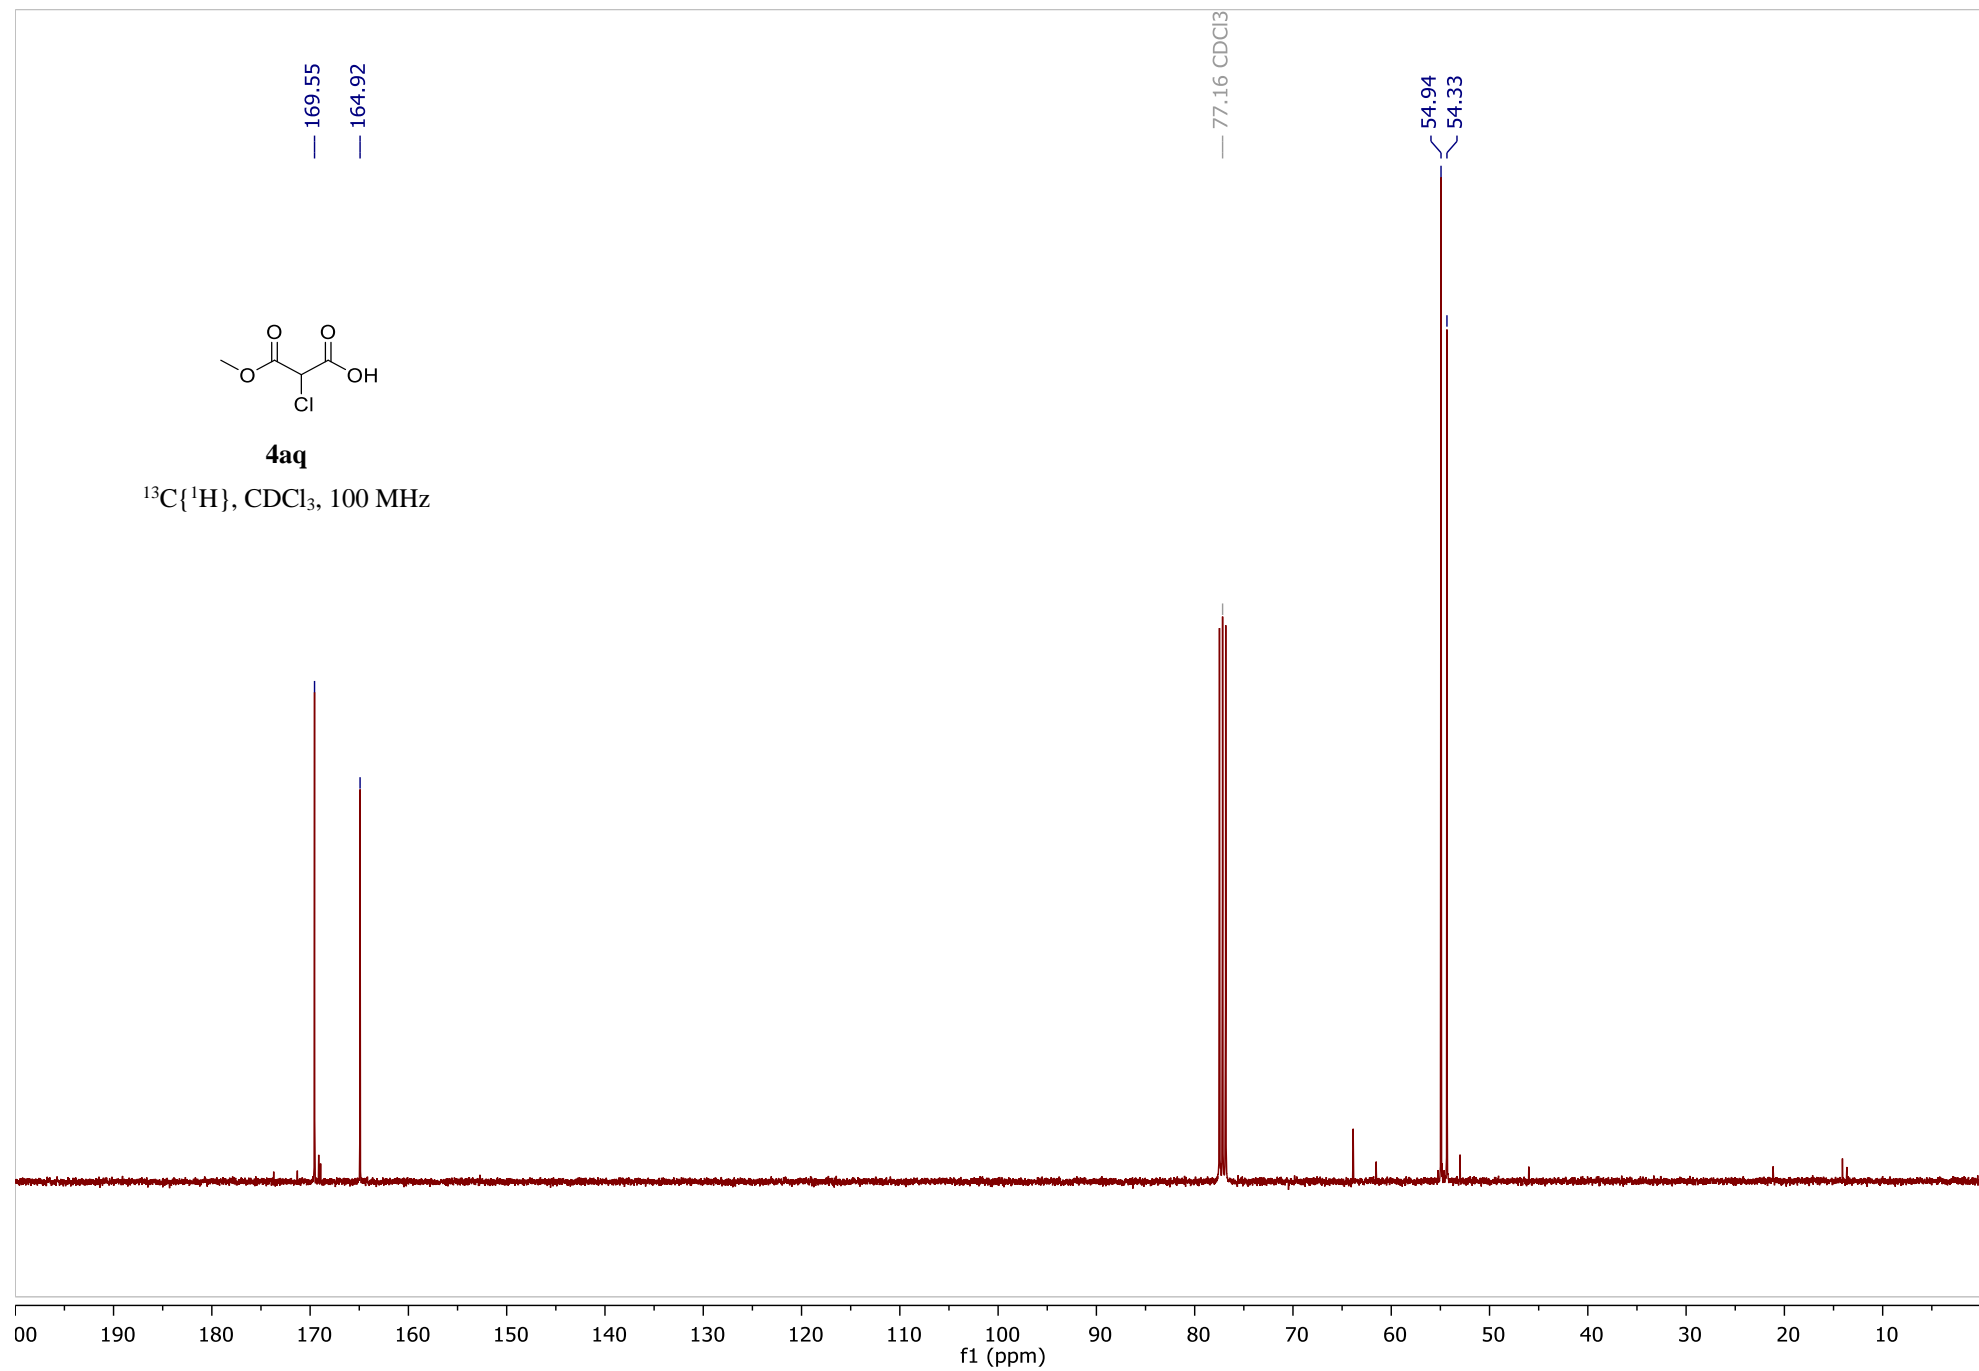

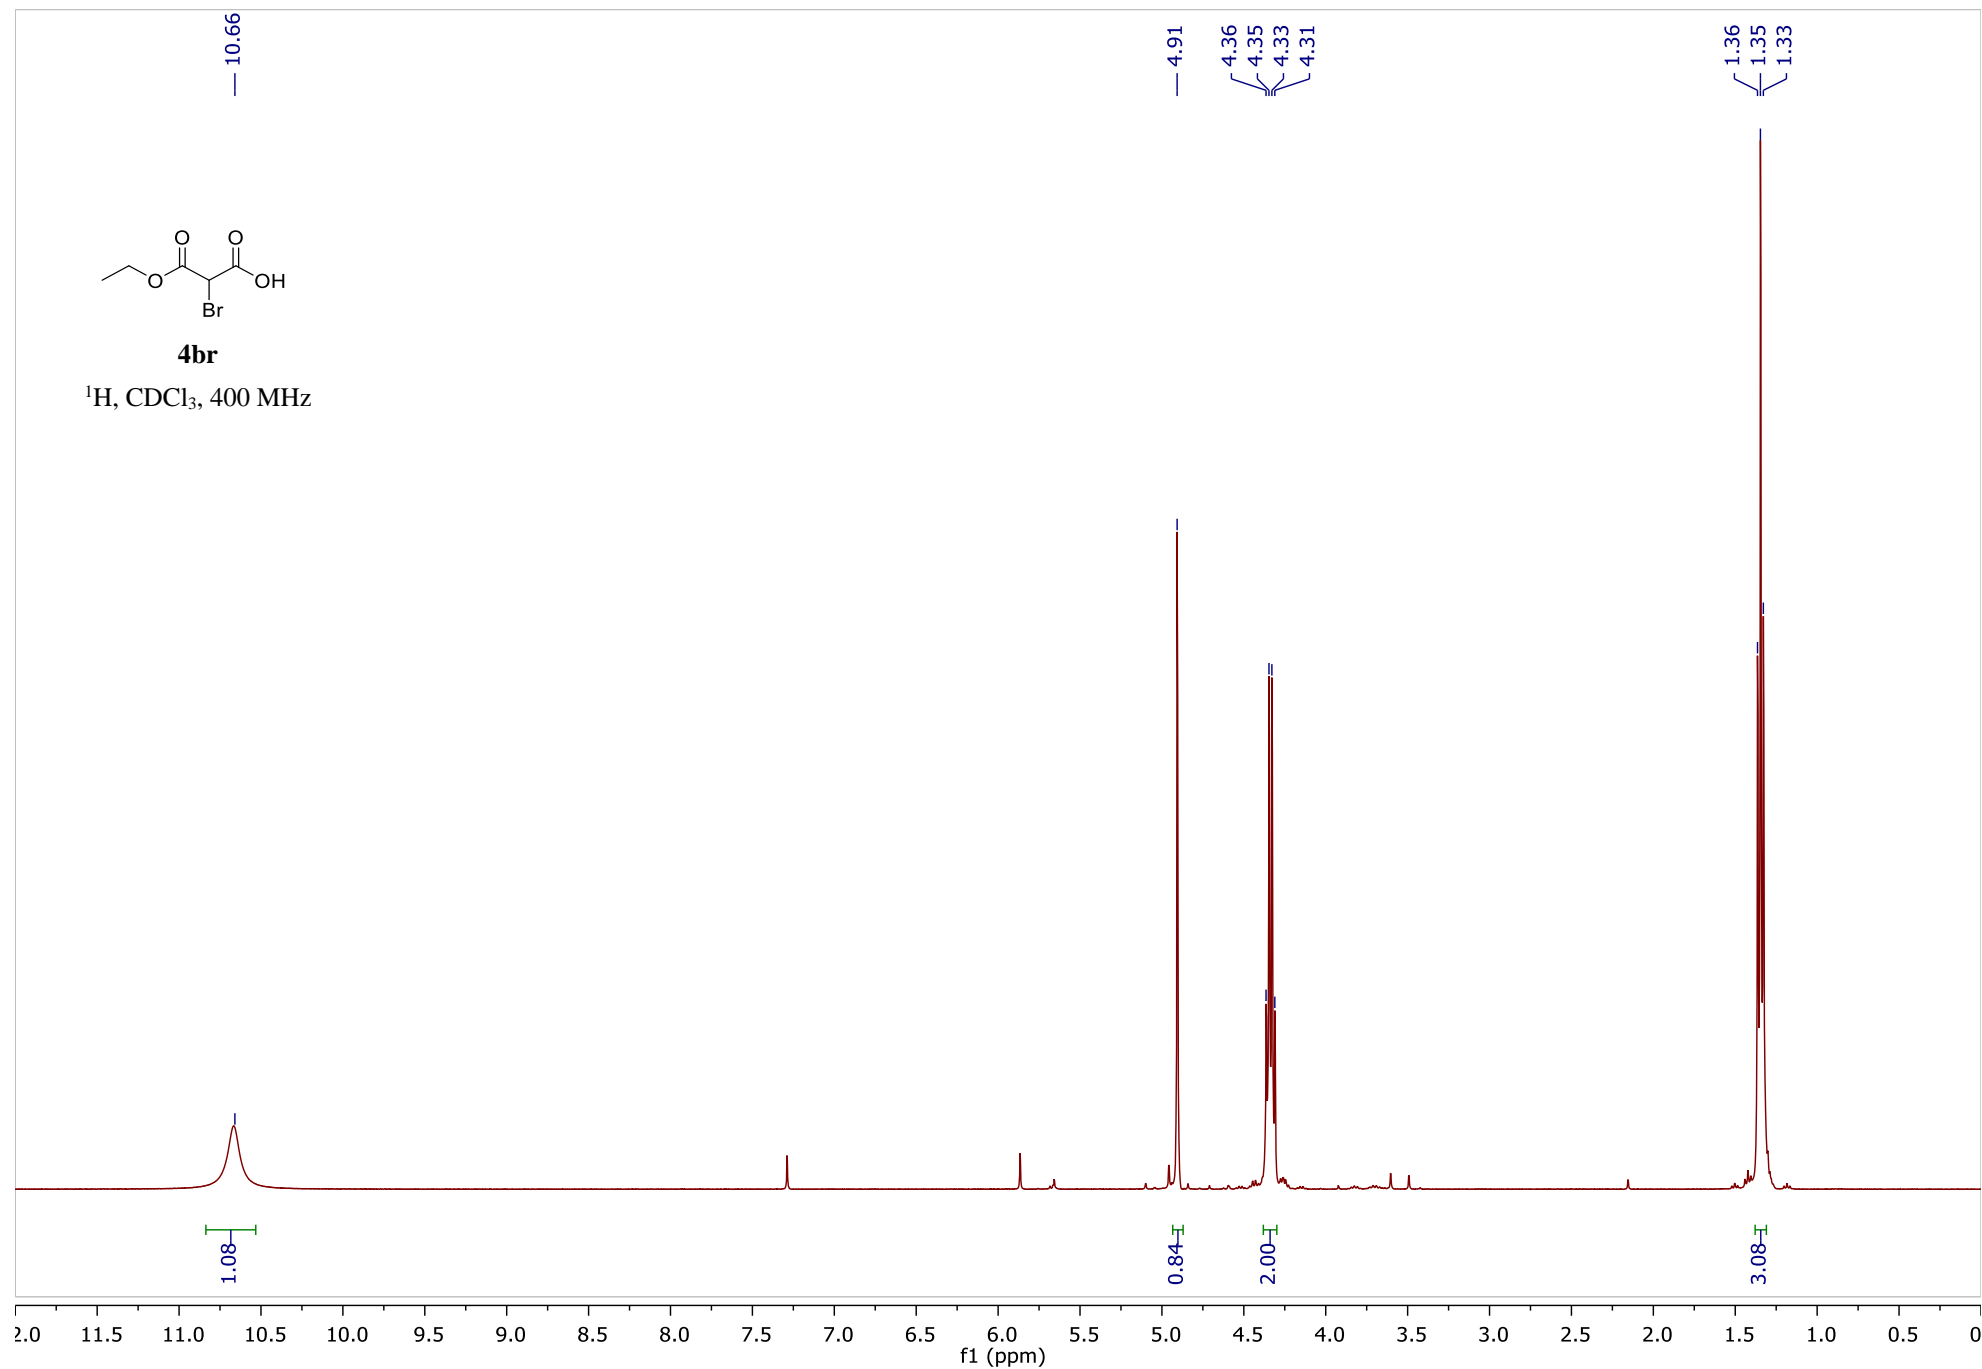

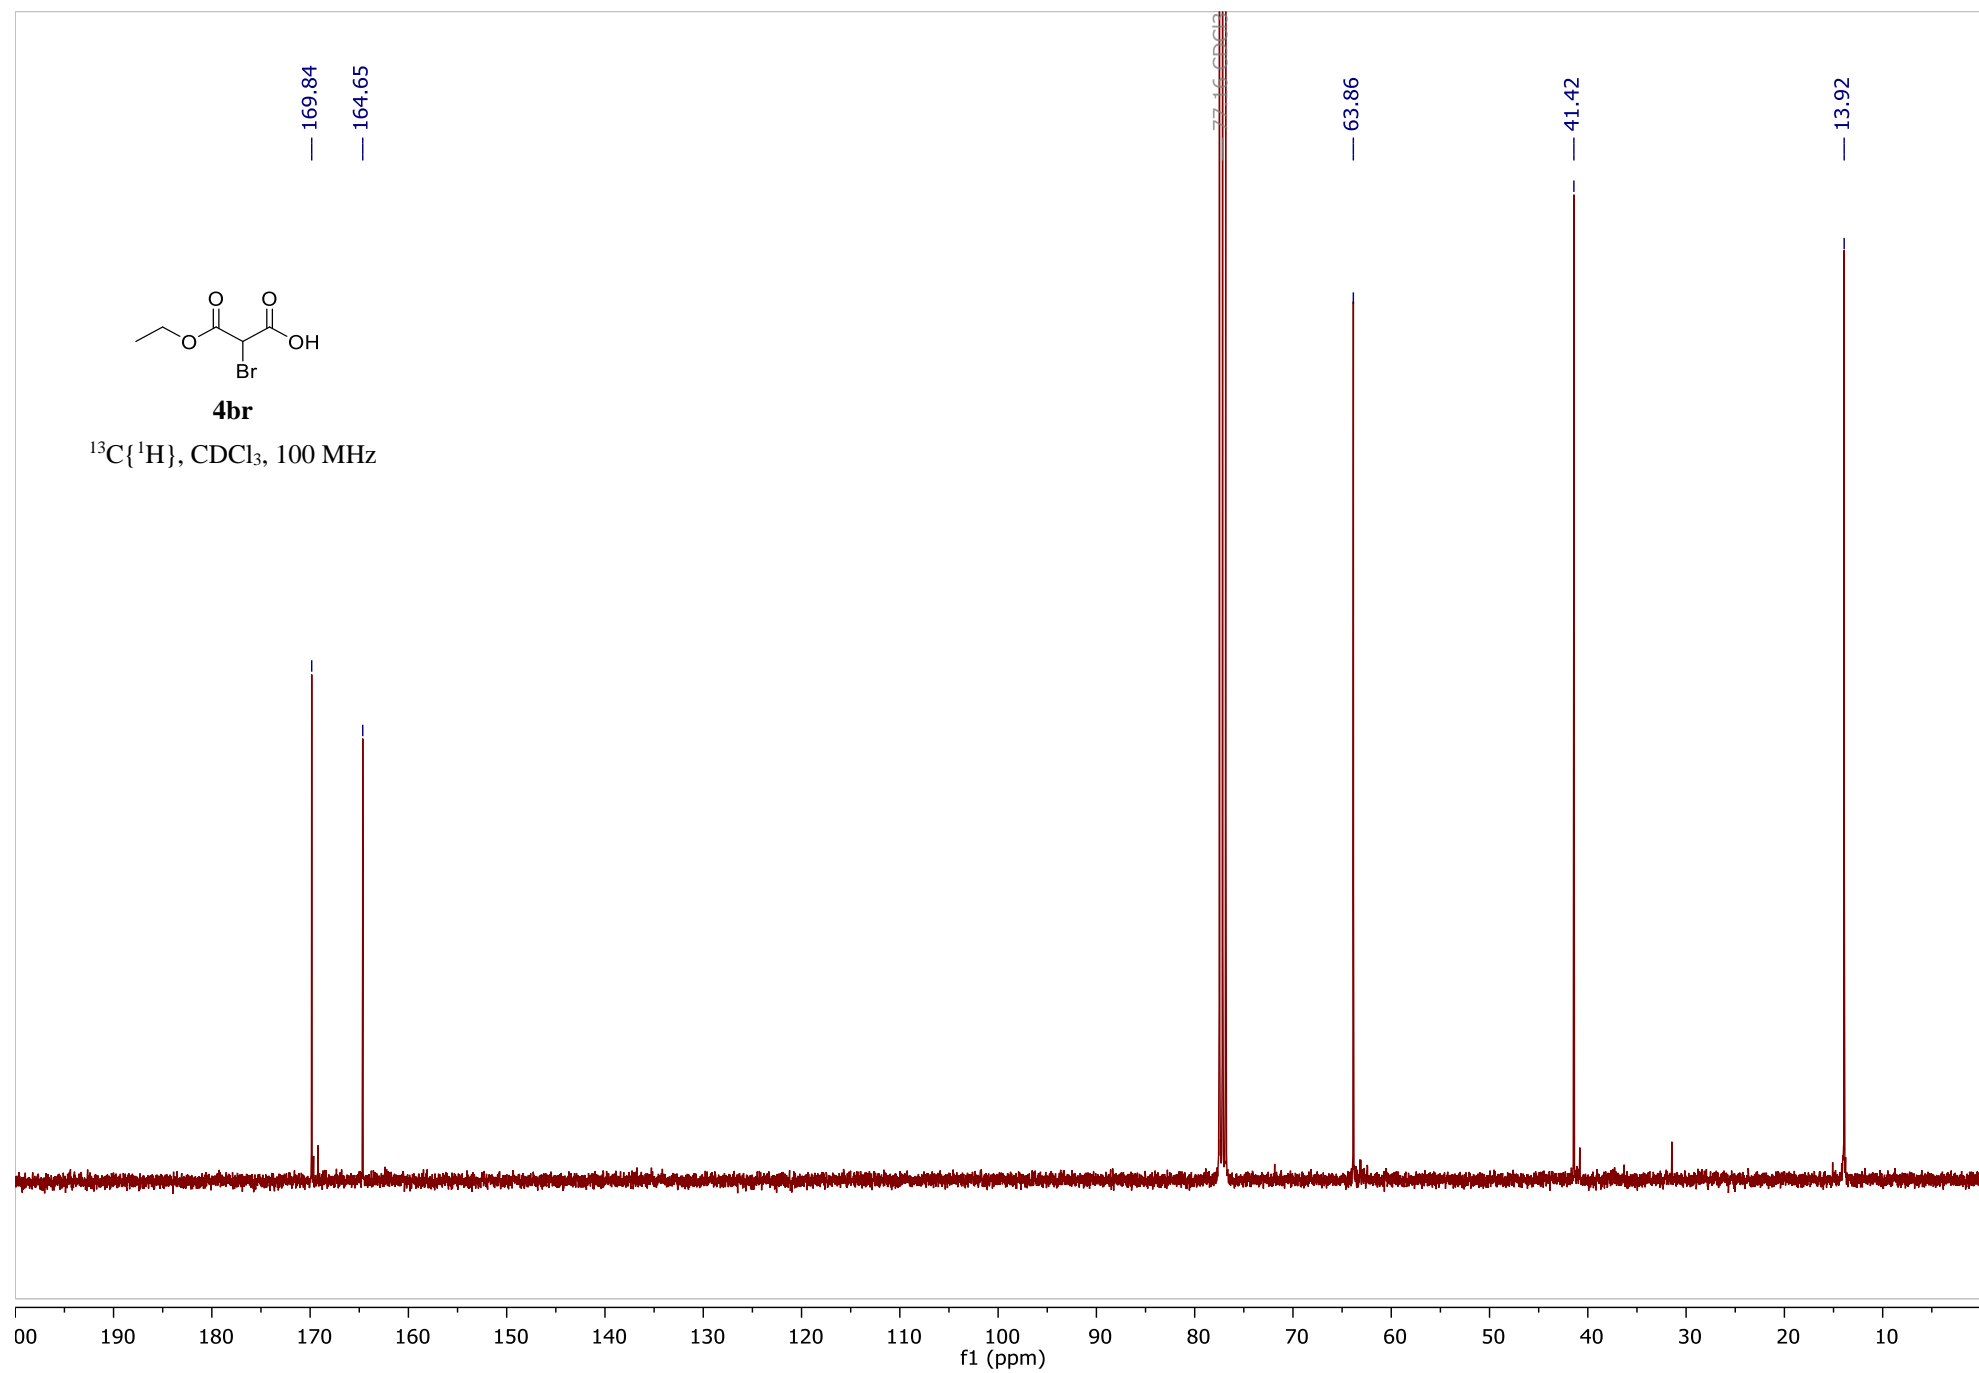

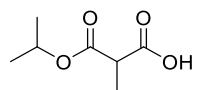

**4ca**

$^1\text{H}$ ,  $\text{CDCl}_3$ , 400 MHz

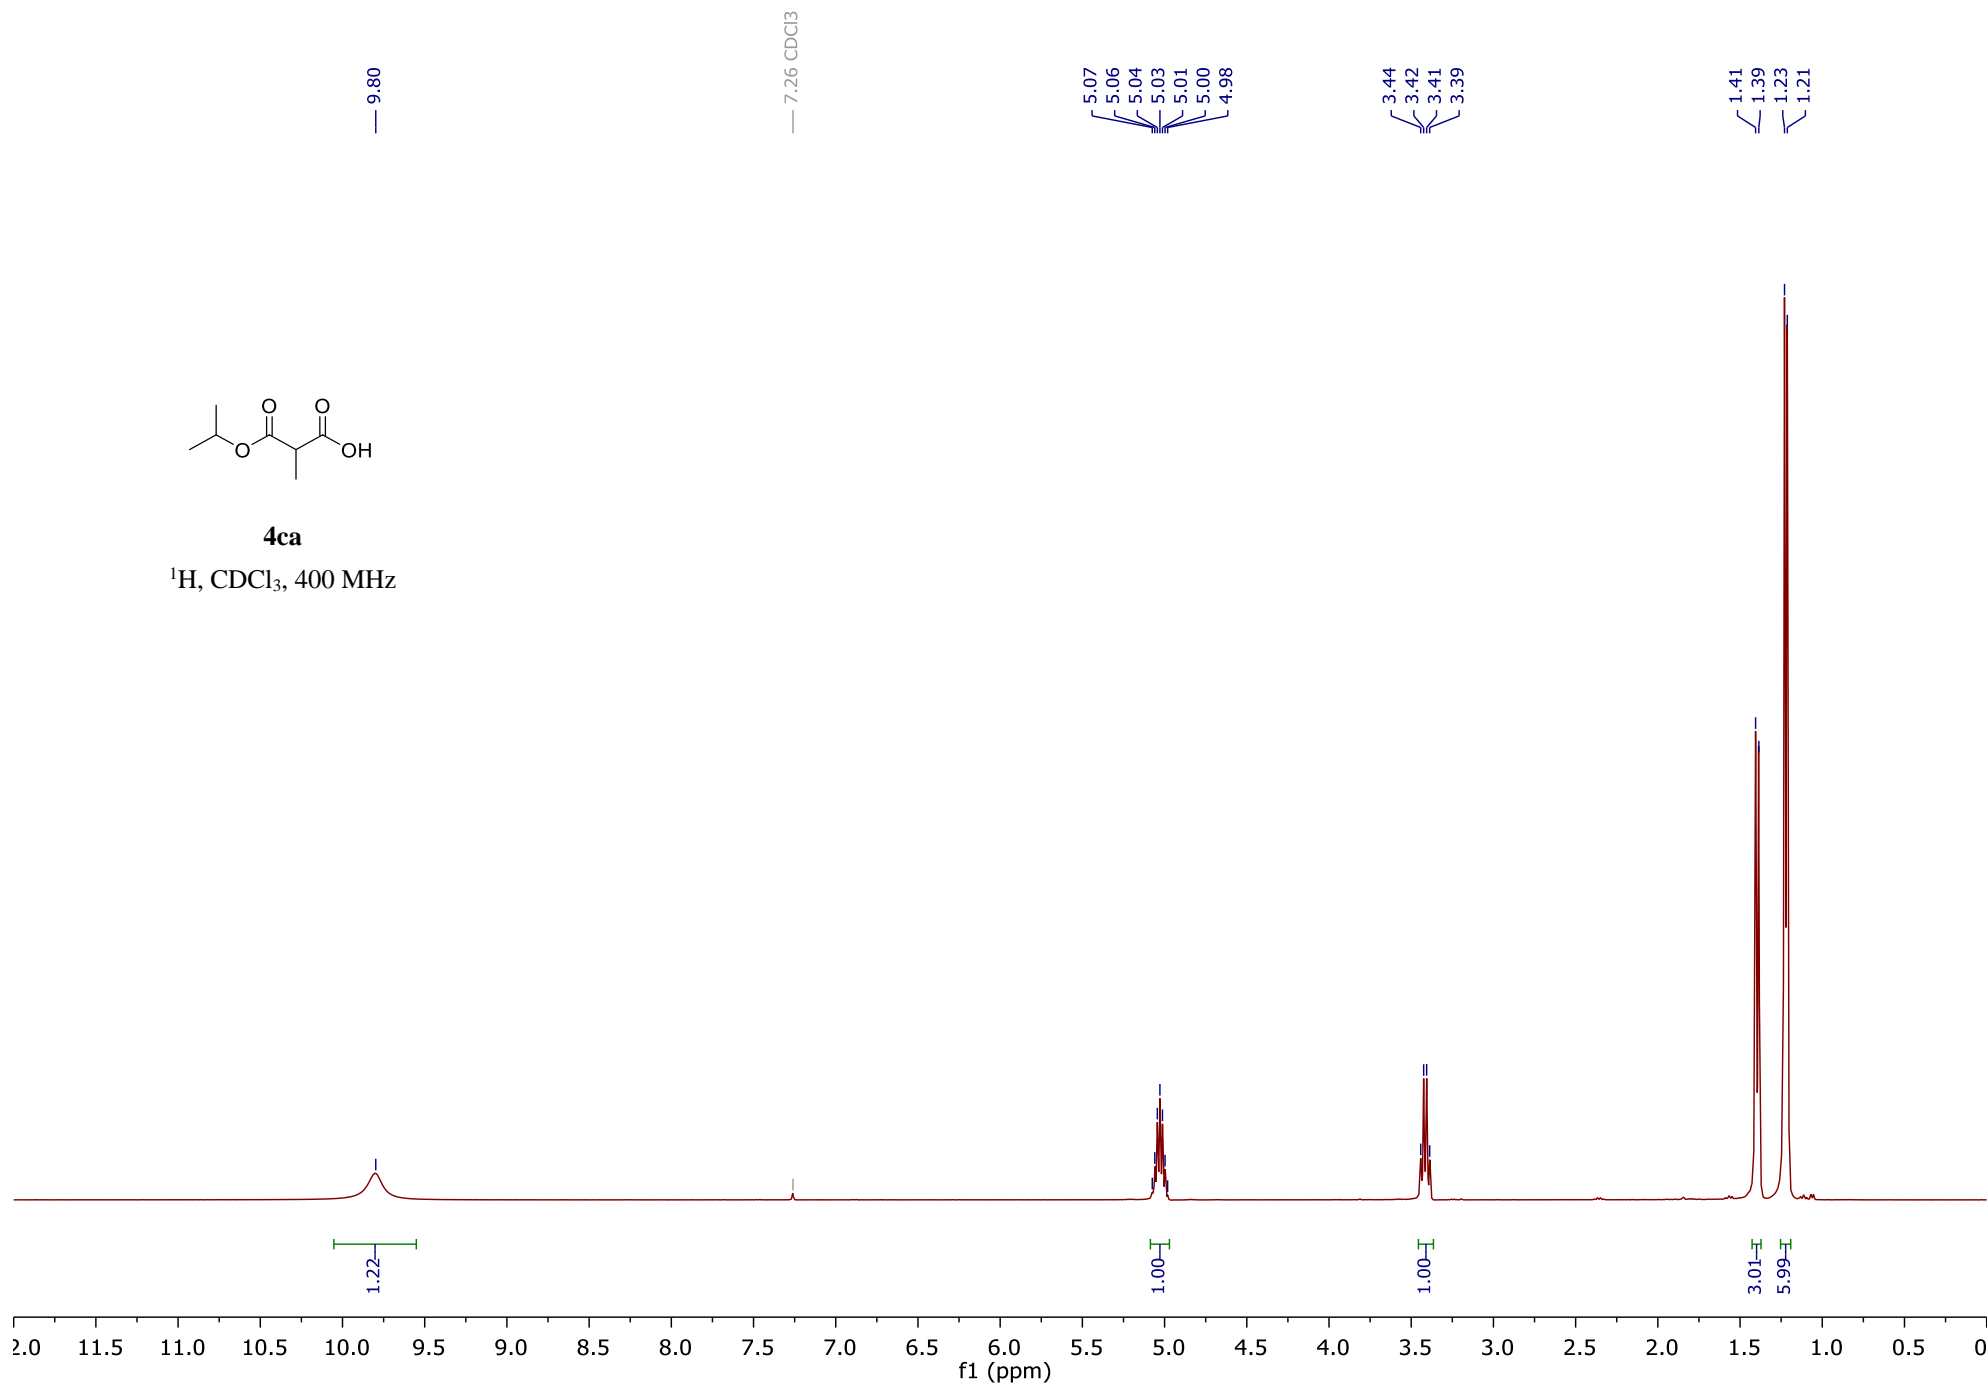



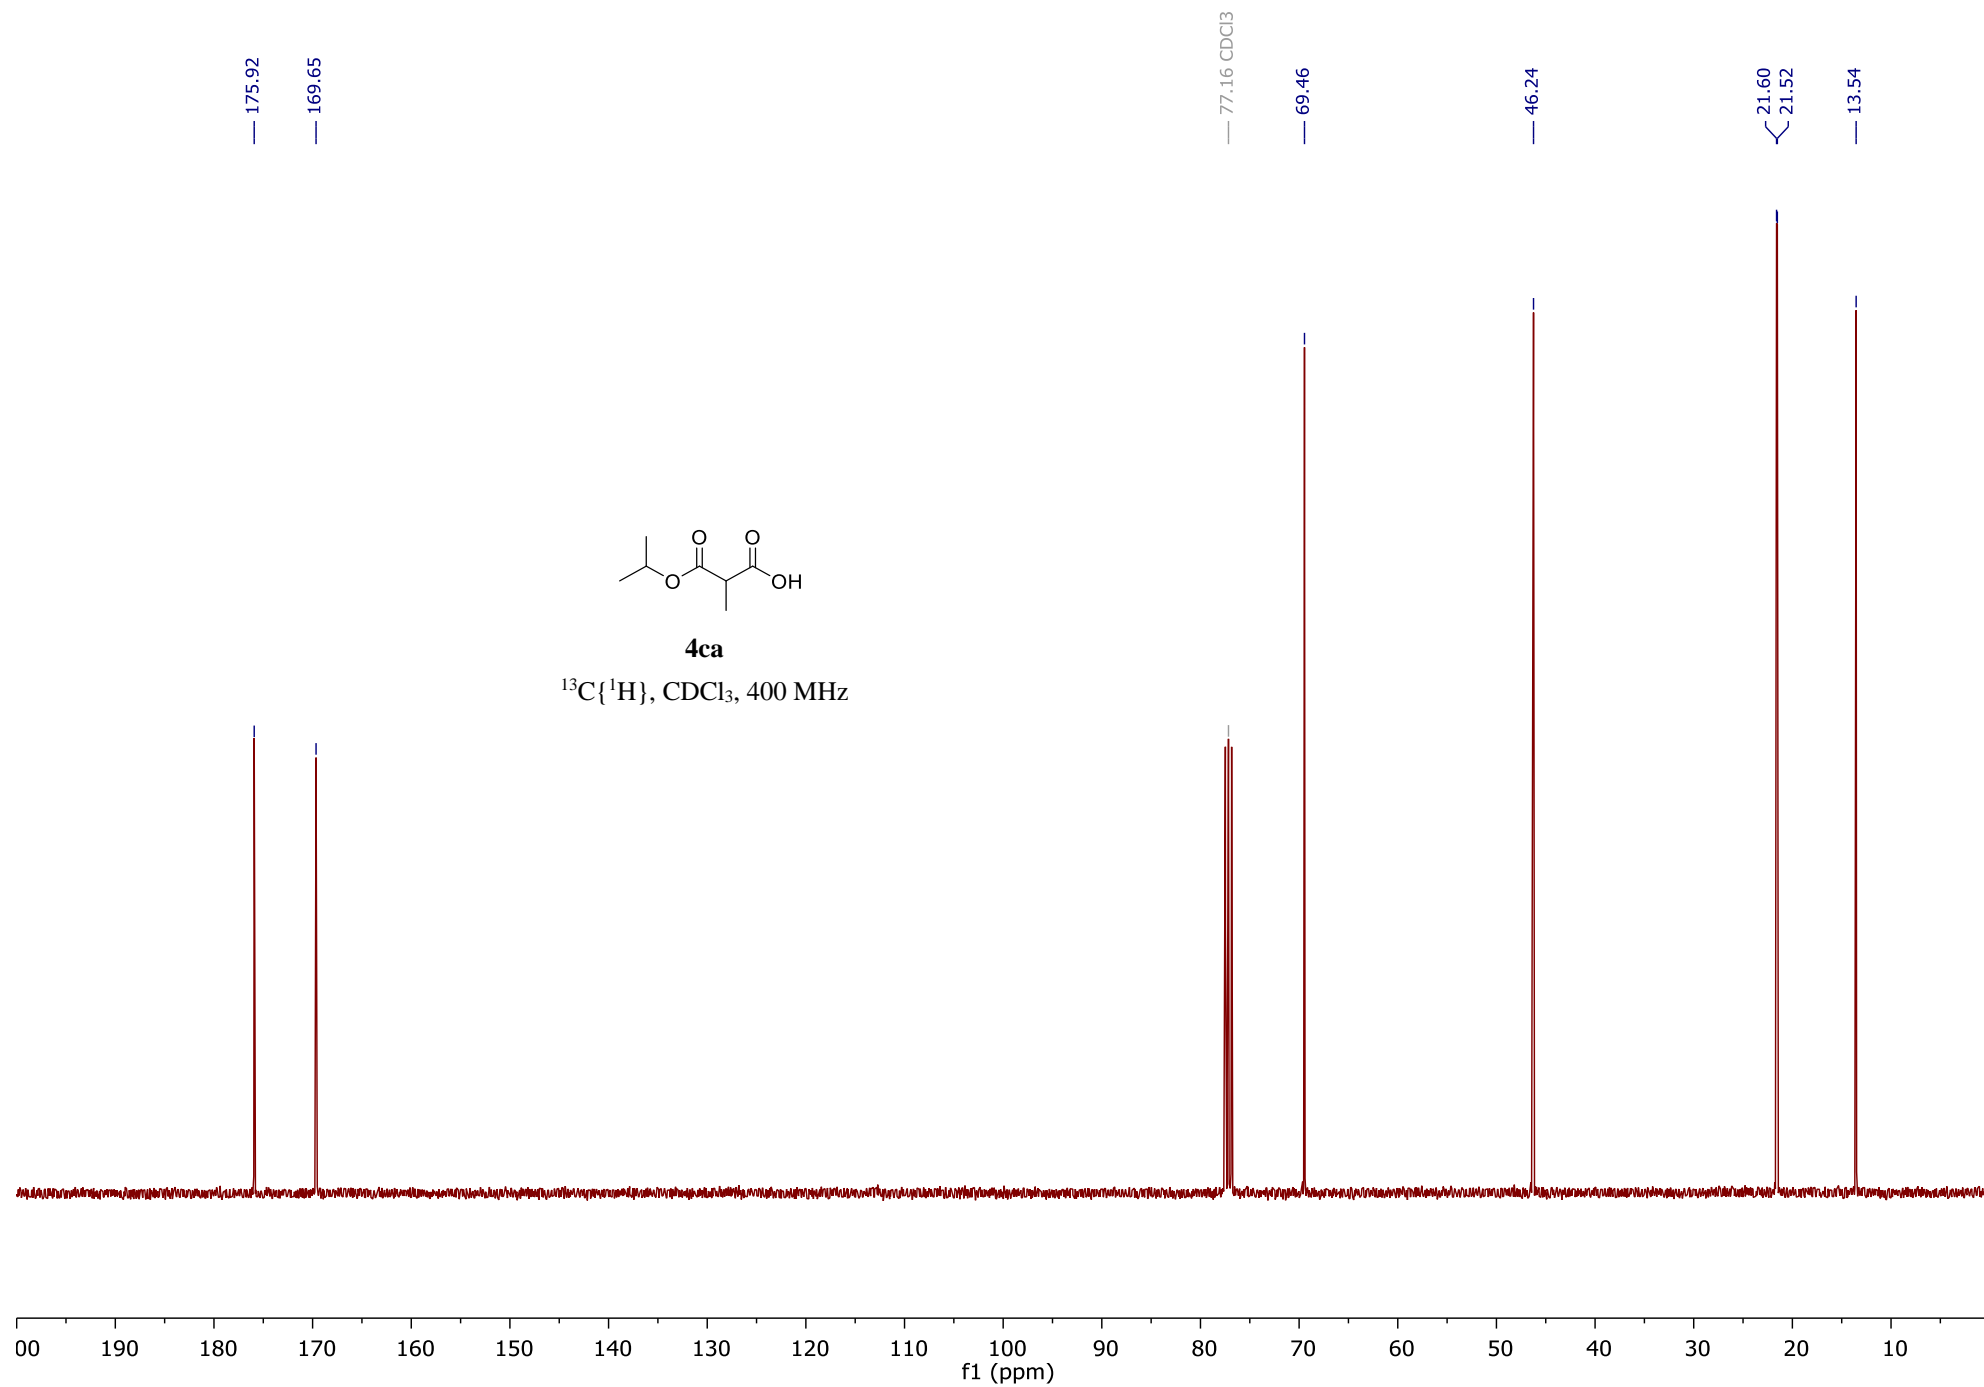

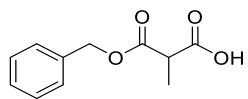

**4da**

<sup>1</sup>H, CDCl<sub>3</sub>, 400 MHz

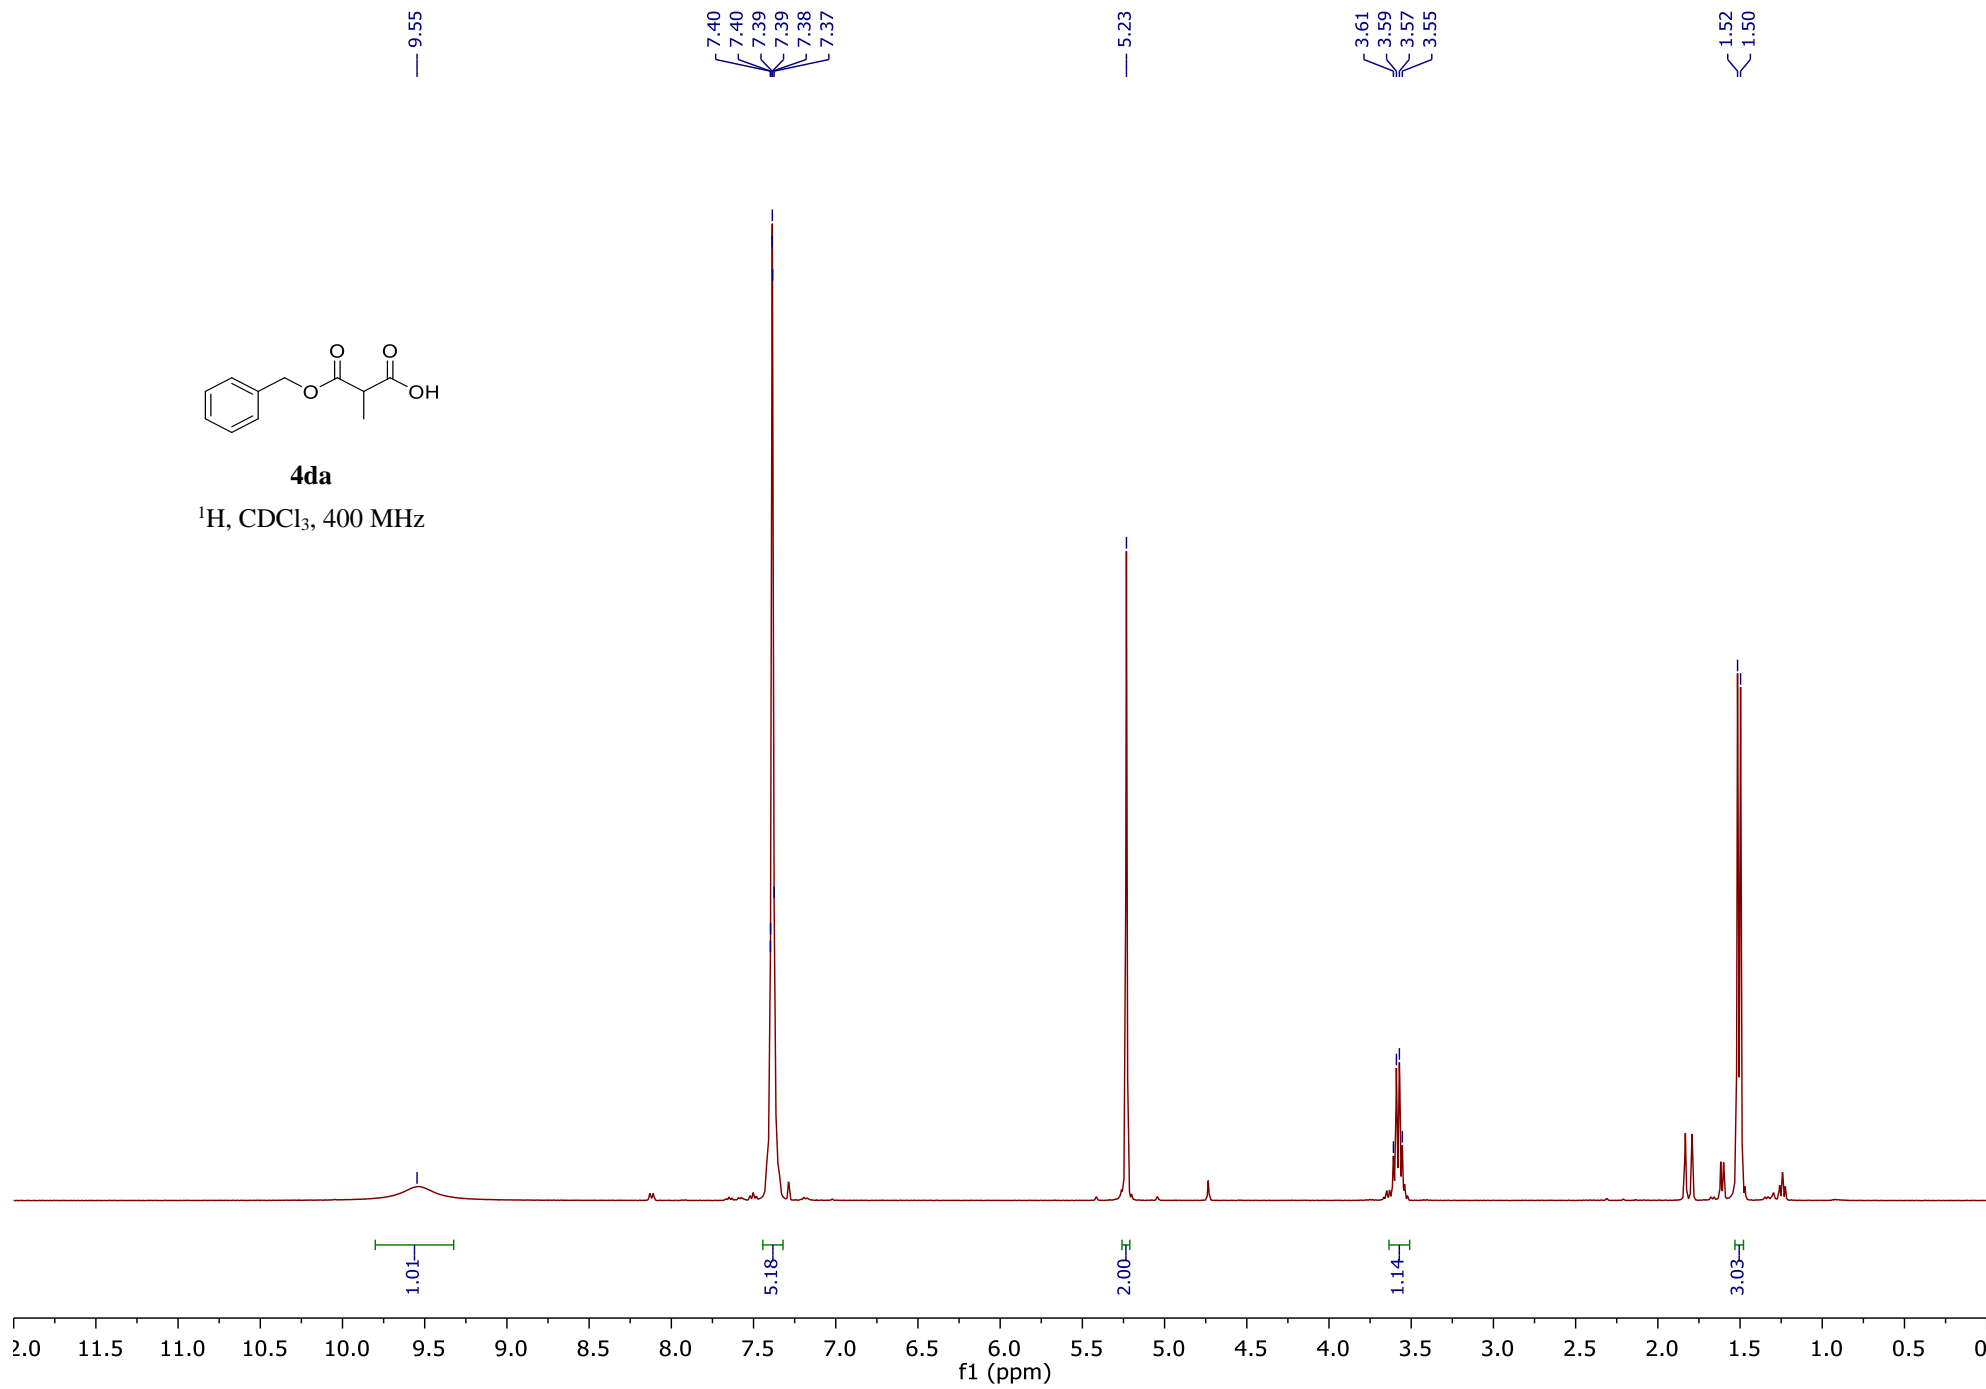

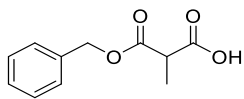

**4da**

$^{13}\text{C}\{^1\text{H}\}$ ,  $\text{CDCl}_3$ , 100 MHz

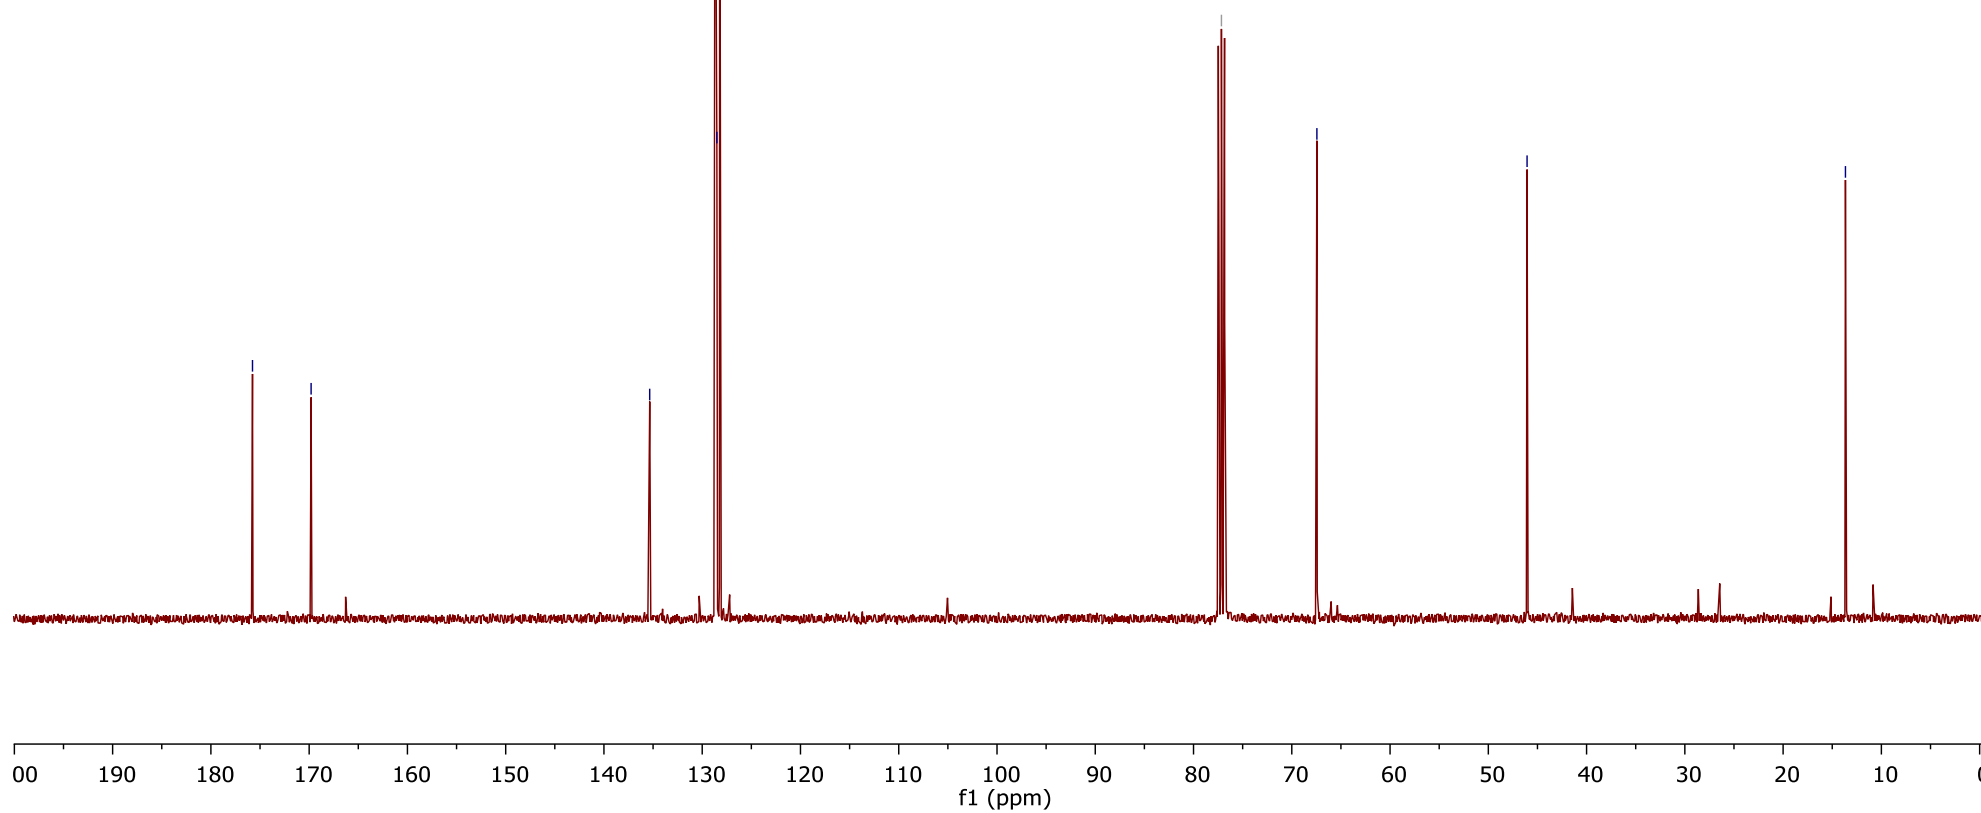

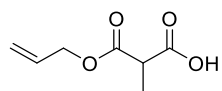

**4fa**

$^1\text{H}$ ,  $\text{CDCl}_3$ , 400 MHz

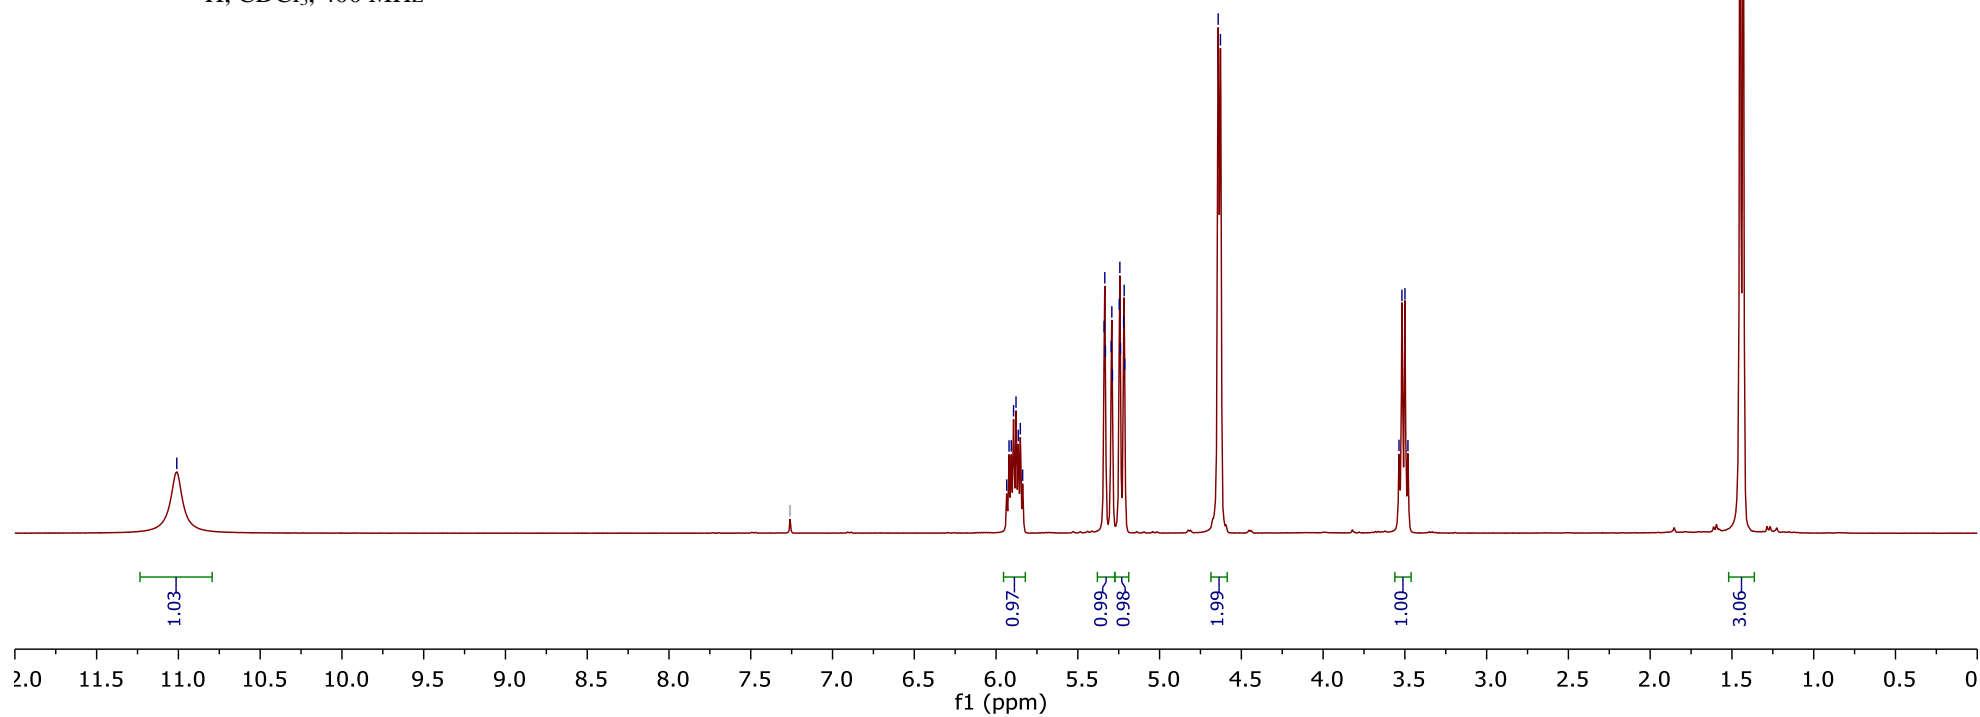

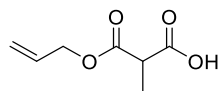

**4fa**

$^{13}\text{C}\{^1\text{H}\}$ ,  $\text{CDCl}_3$ , 400 MHz

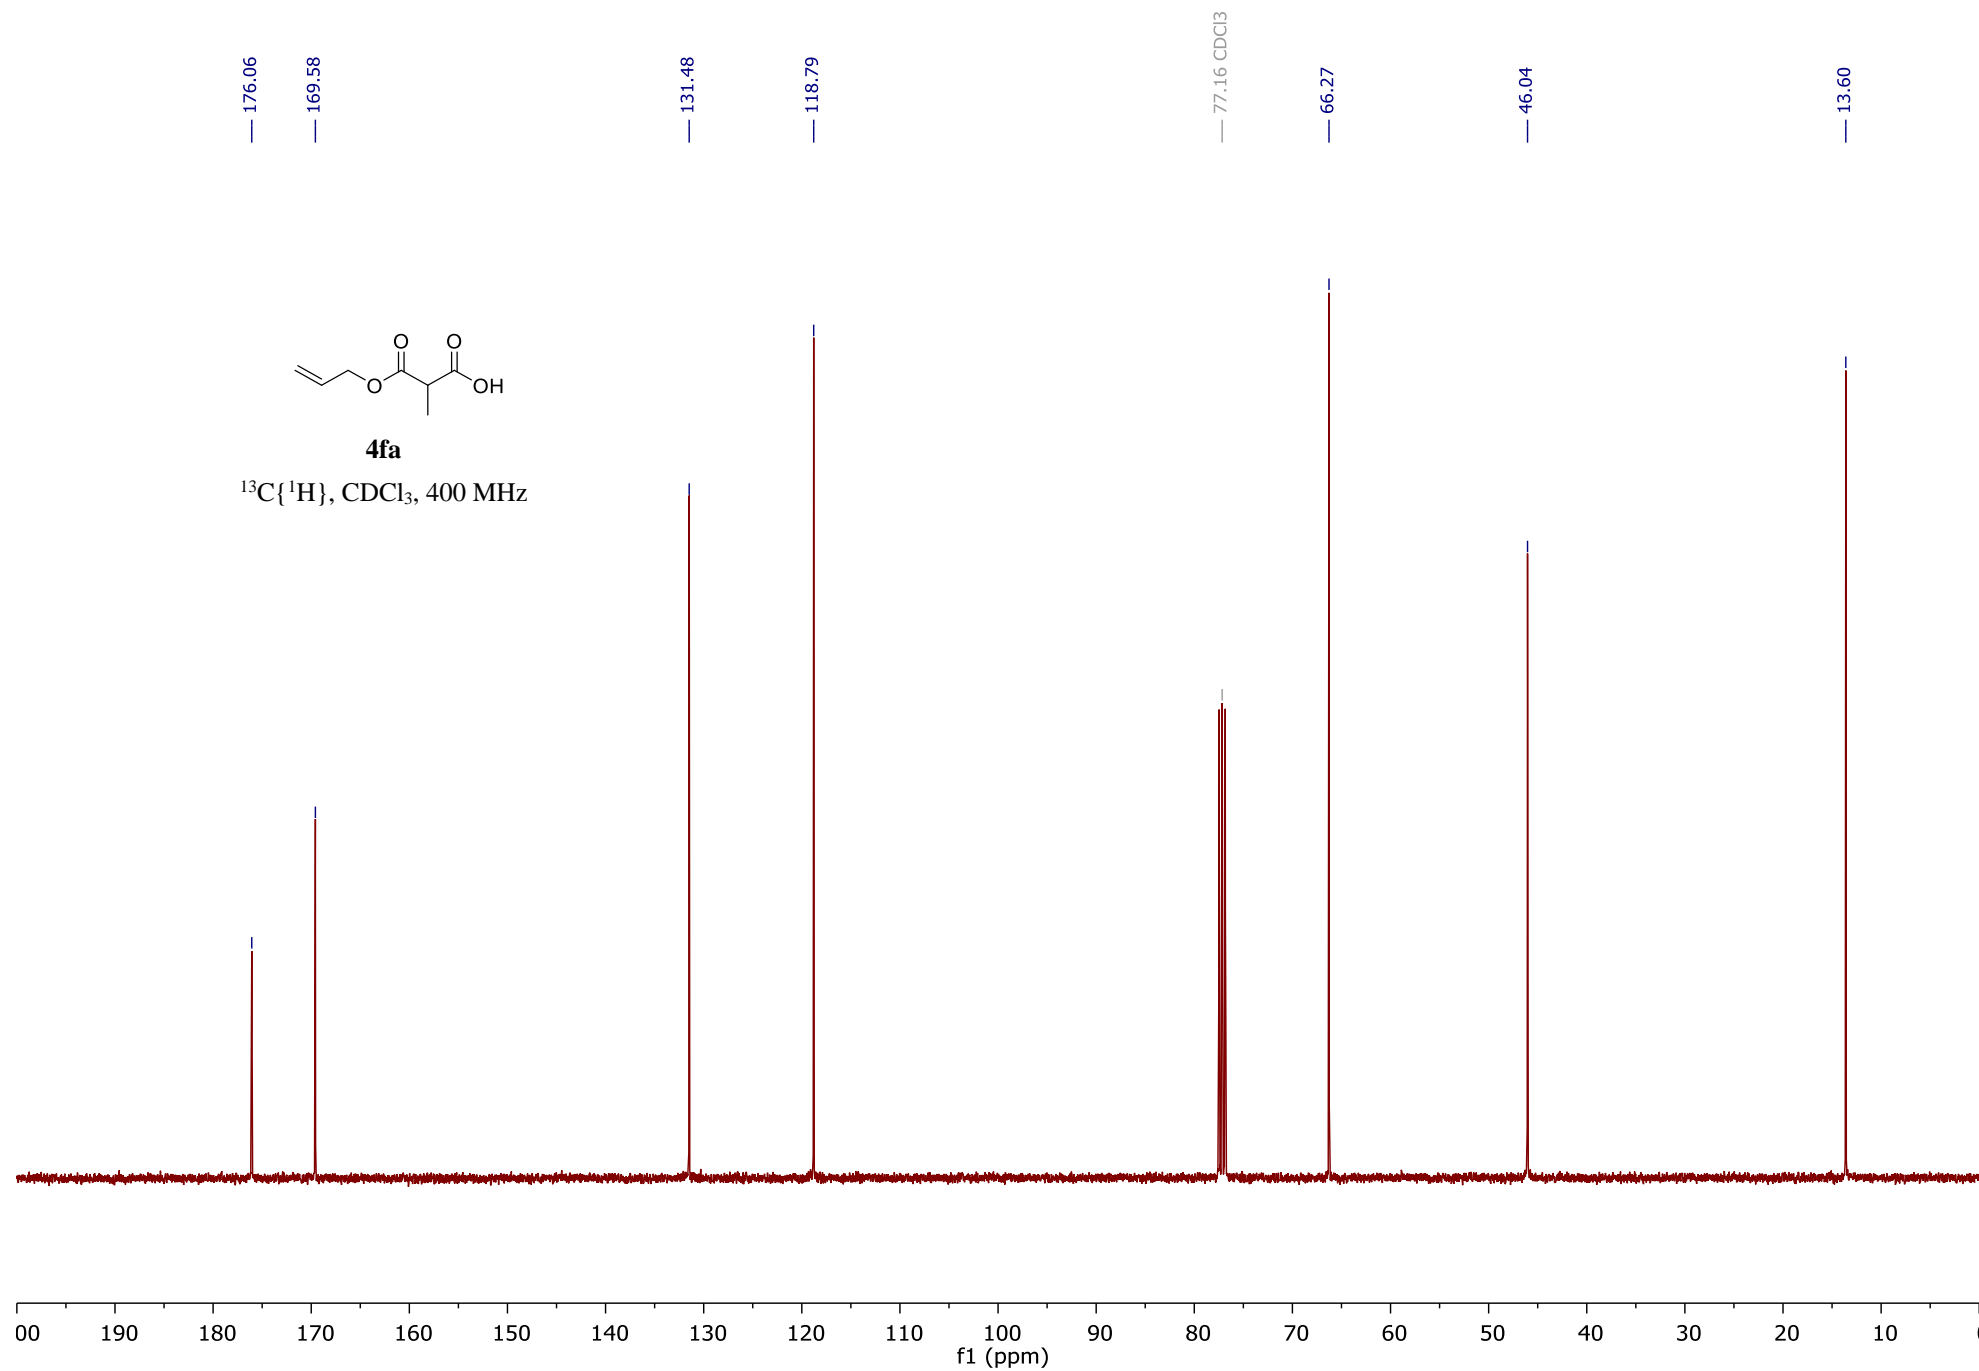

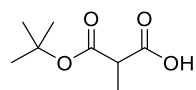

**4ga**

$^1\text{H}$ ,  $\text{CDCl}_3$ , 400 MHz

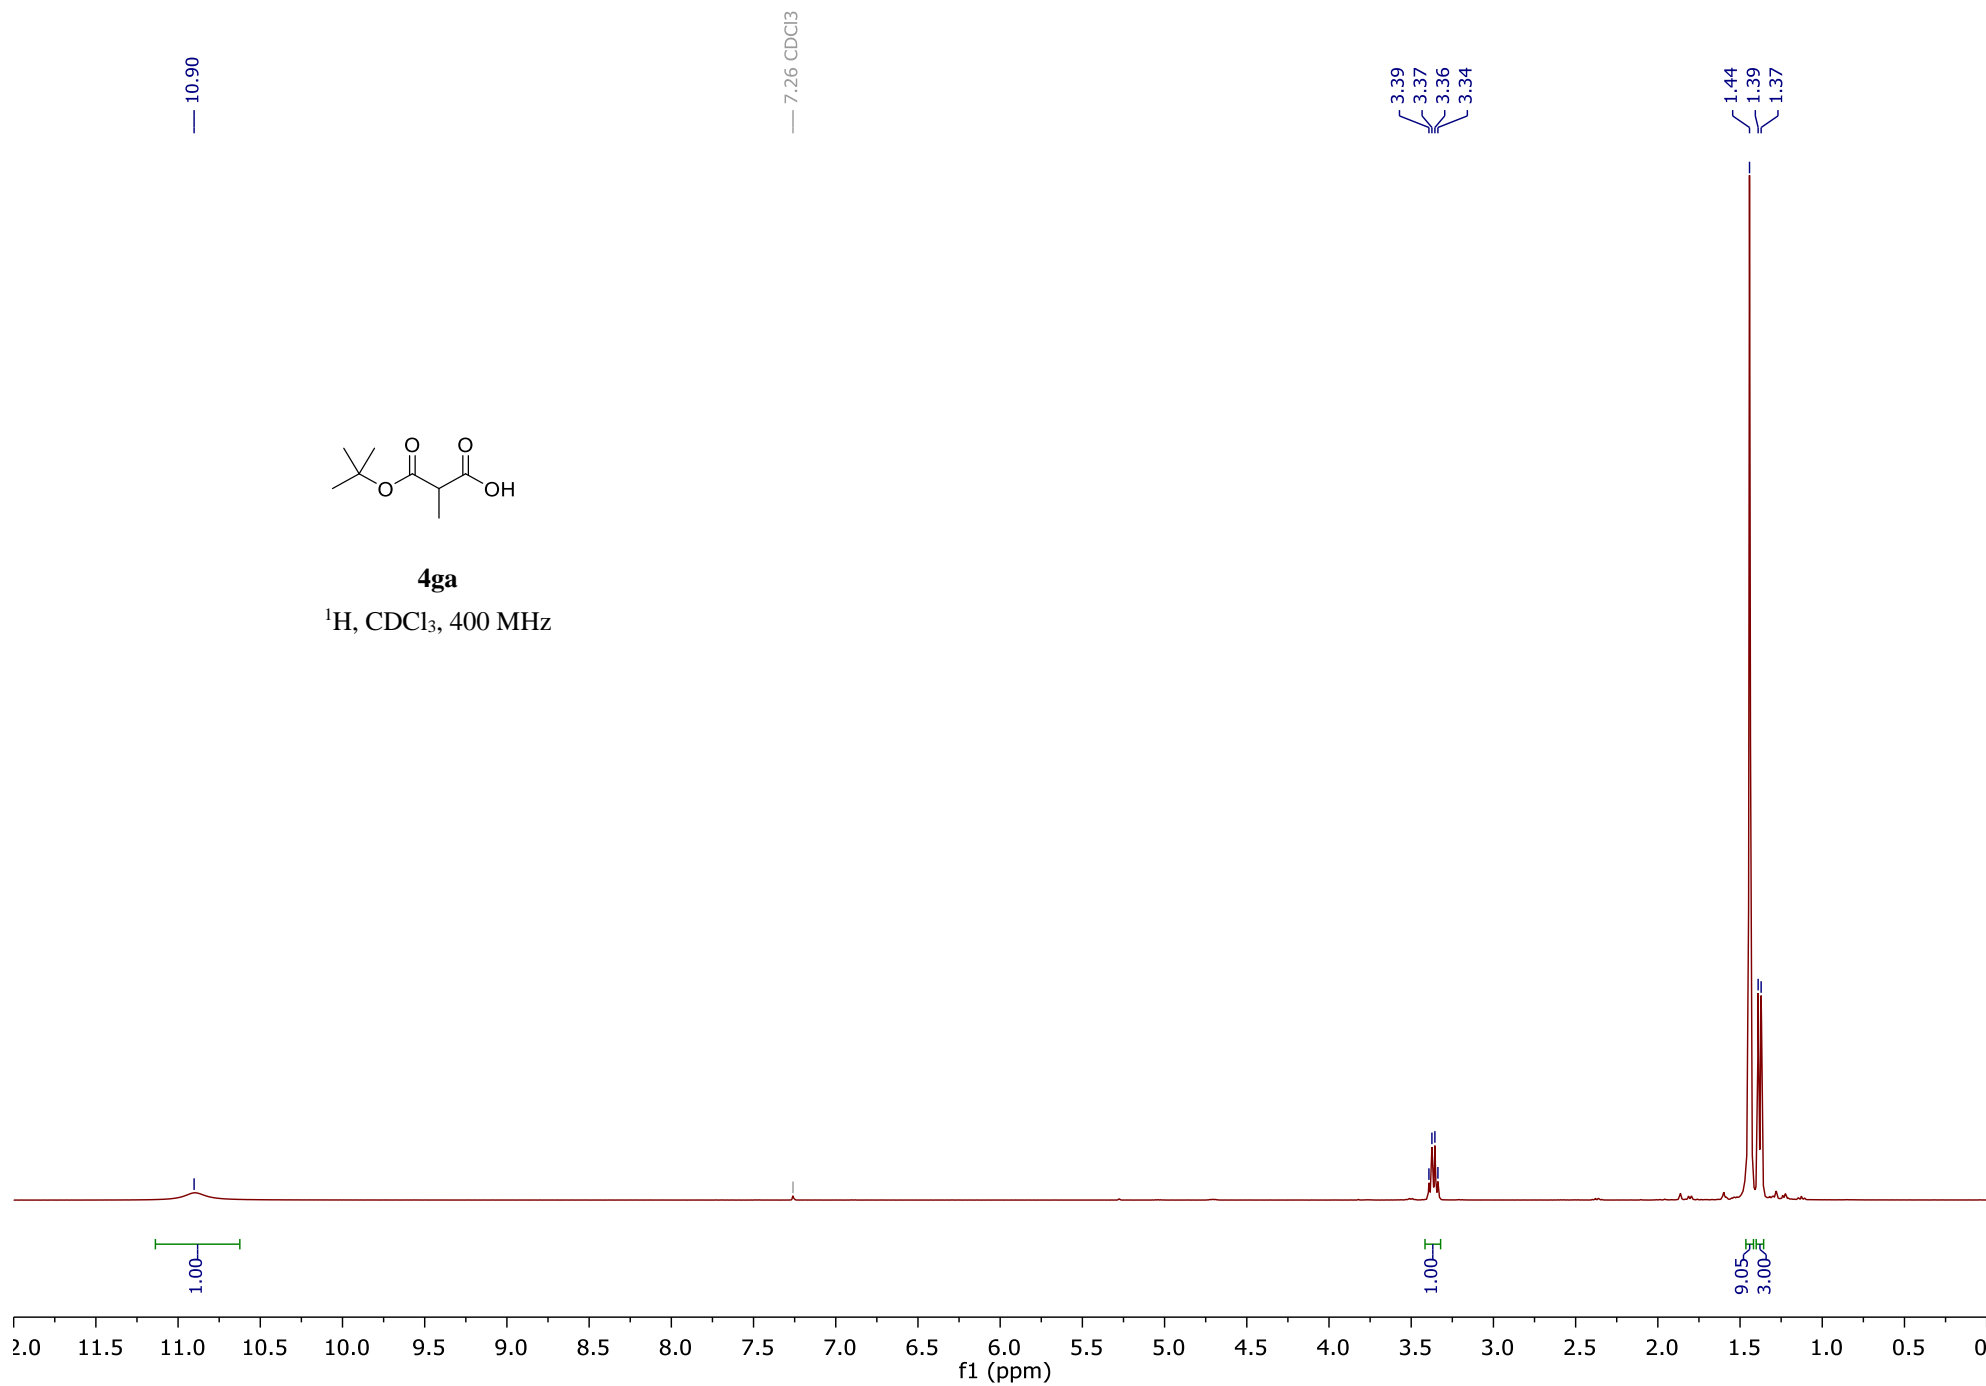

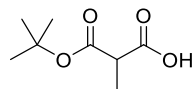

**4ga**

$^{13}\text{C}\{^1\text{H}\}$ ,  $\text{CDCl}_3$ , 400 MHz

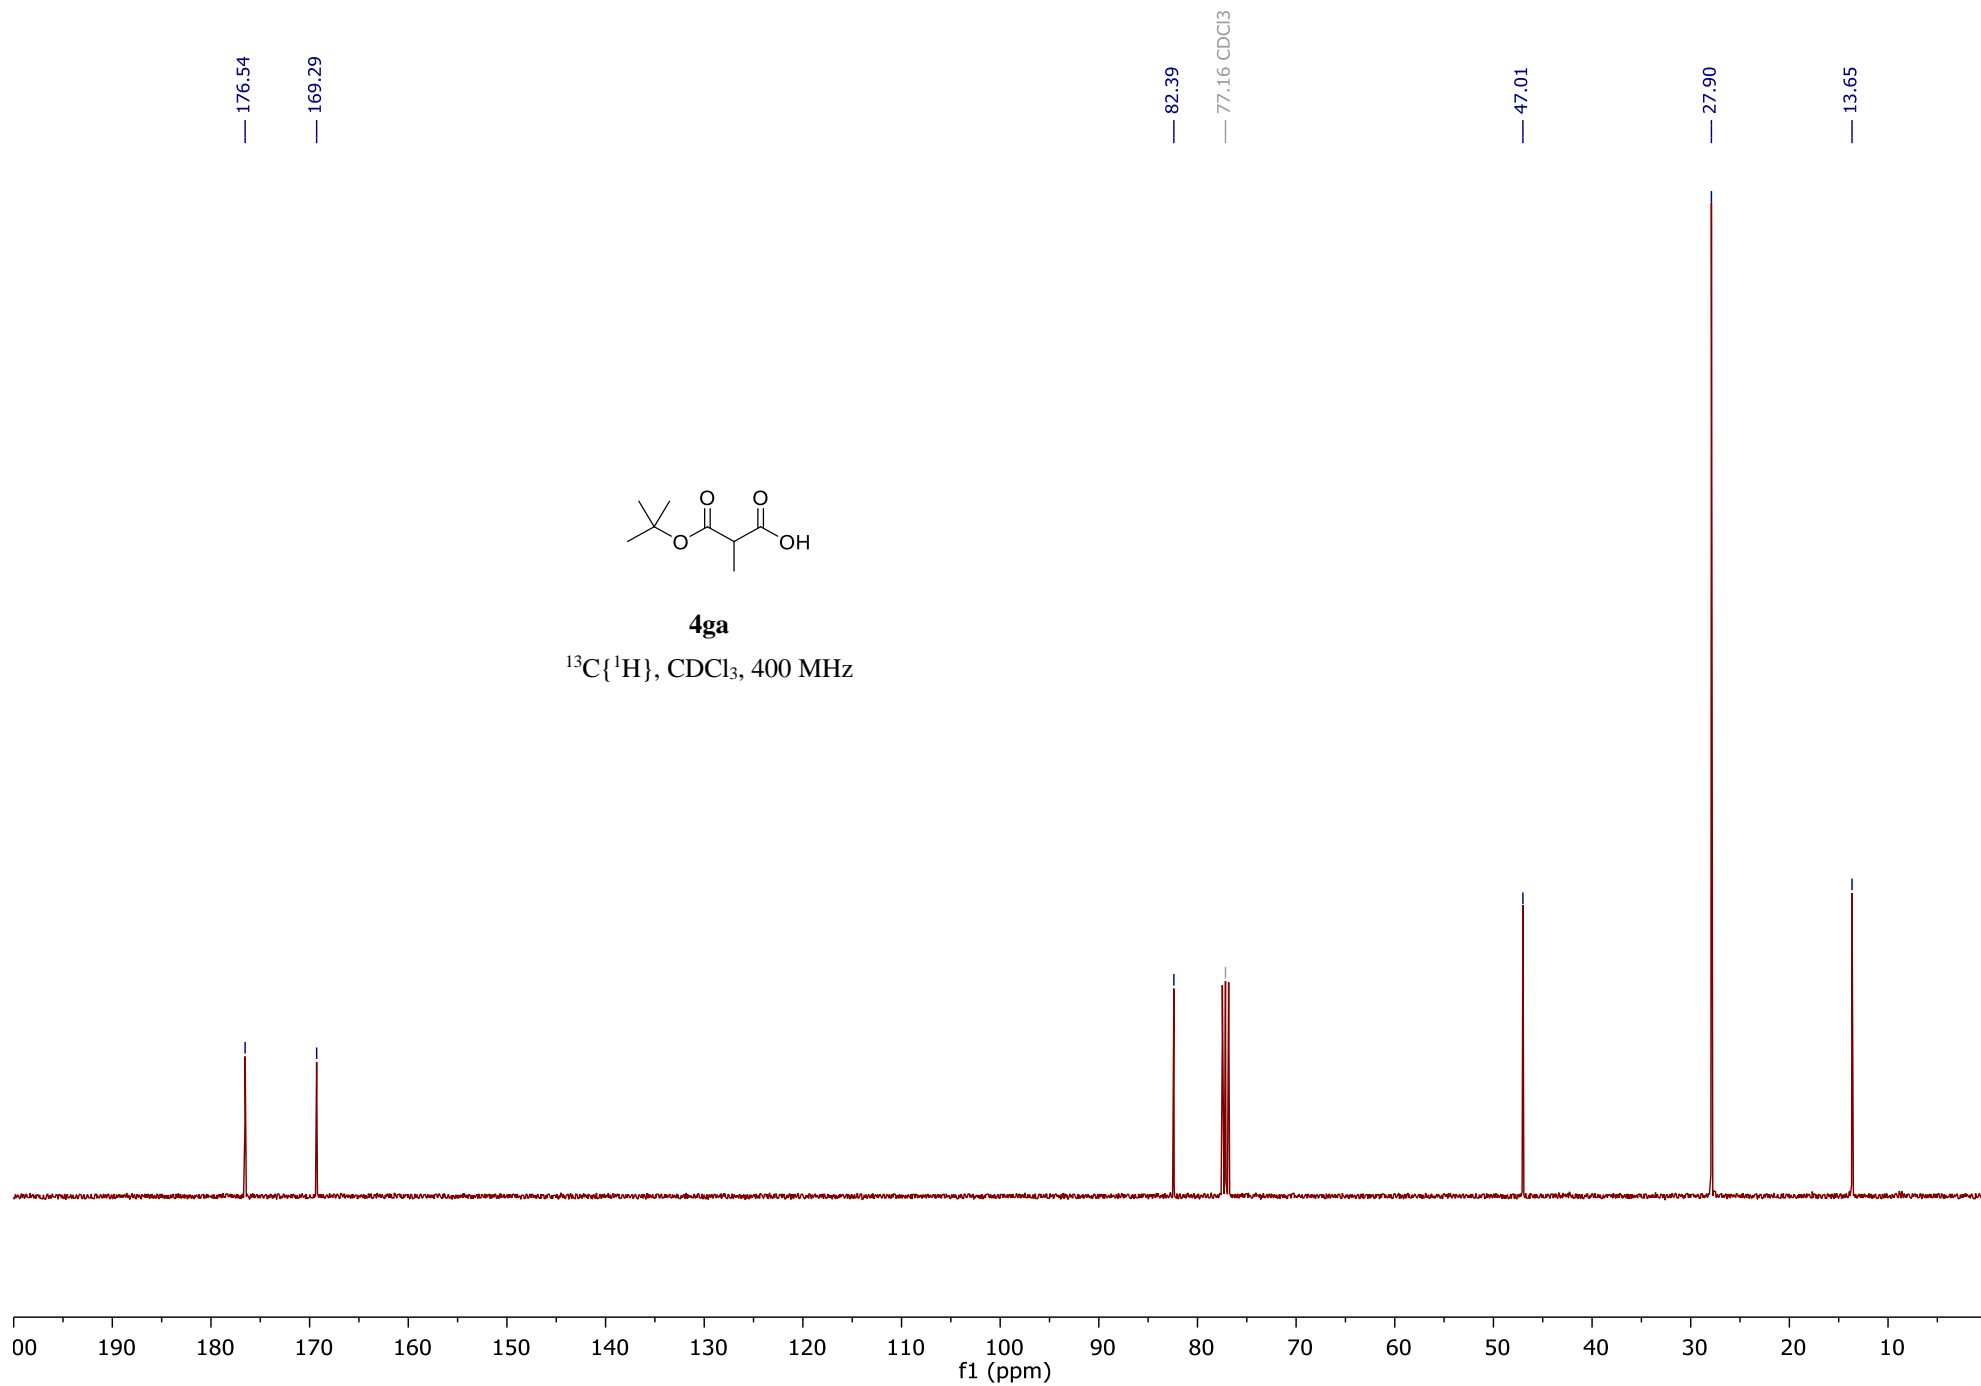

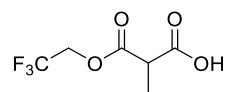

**4ha**

<sup>1</sup>H, CDCl<sub>3</sub>, 400 MHz

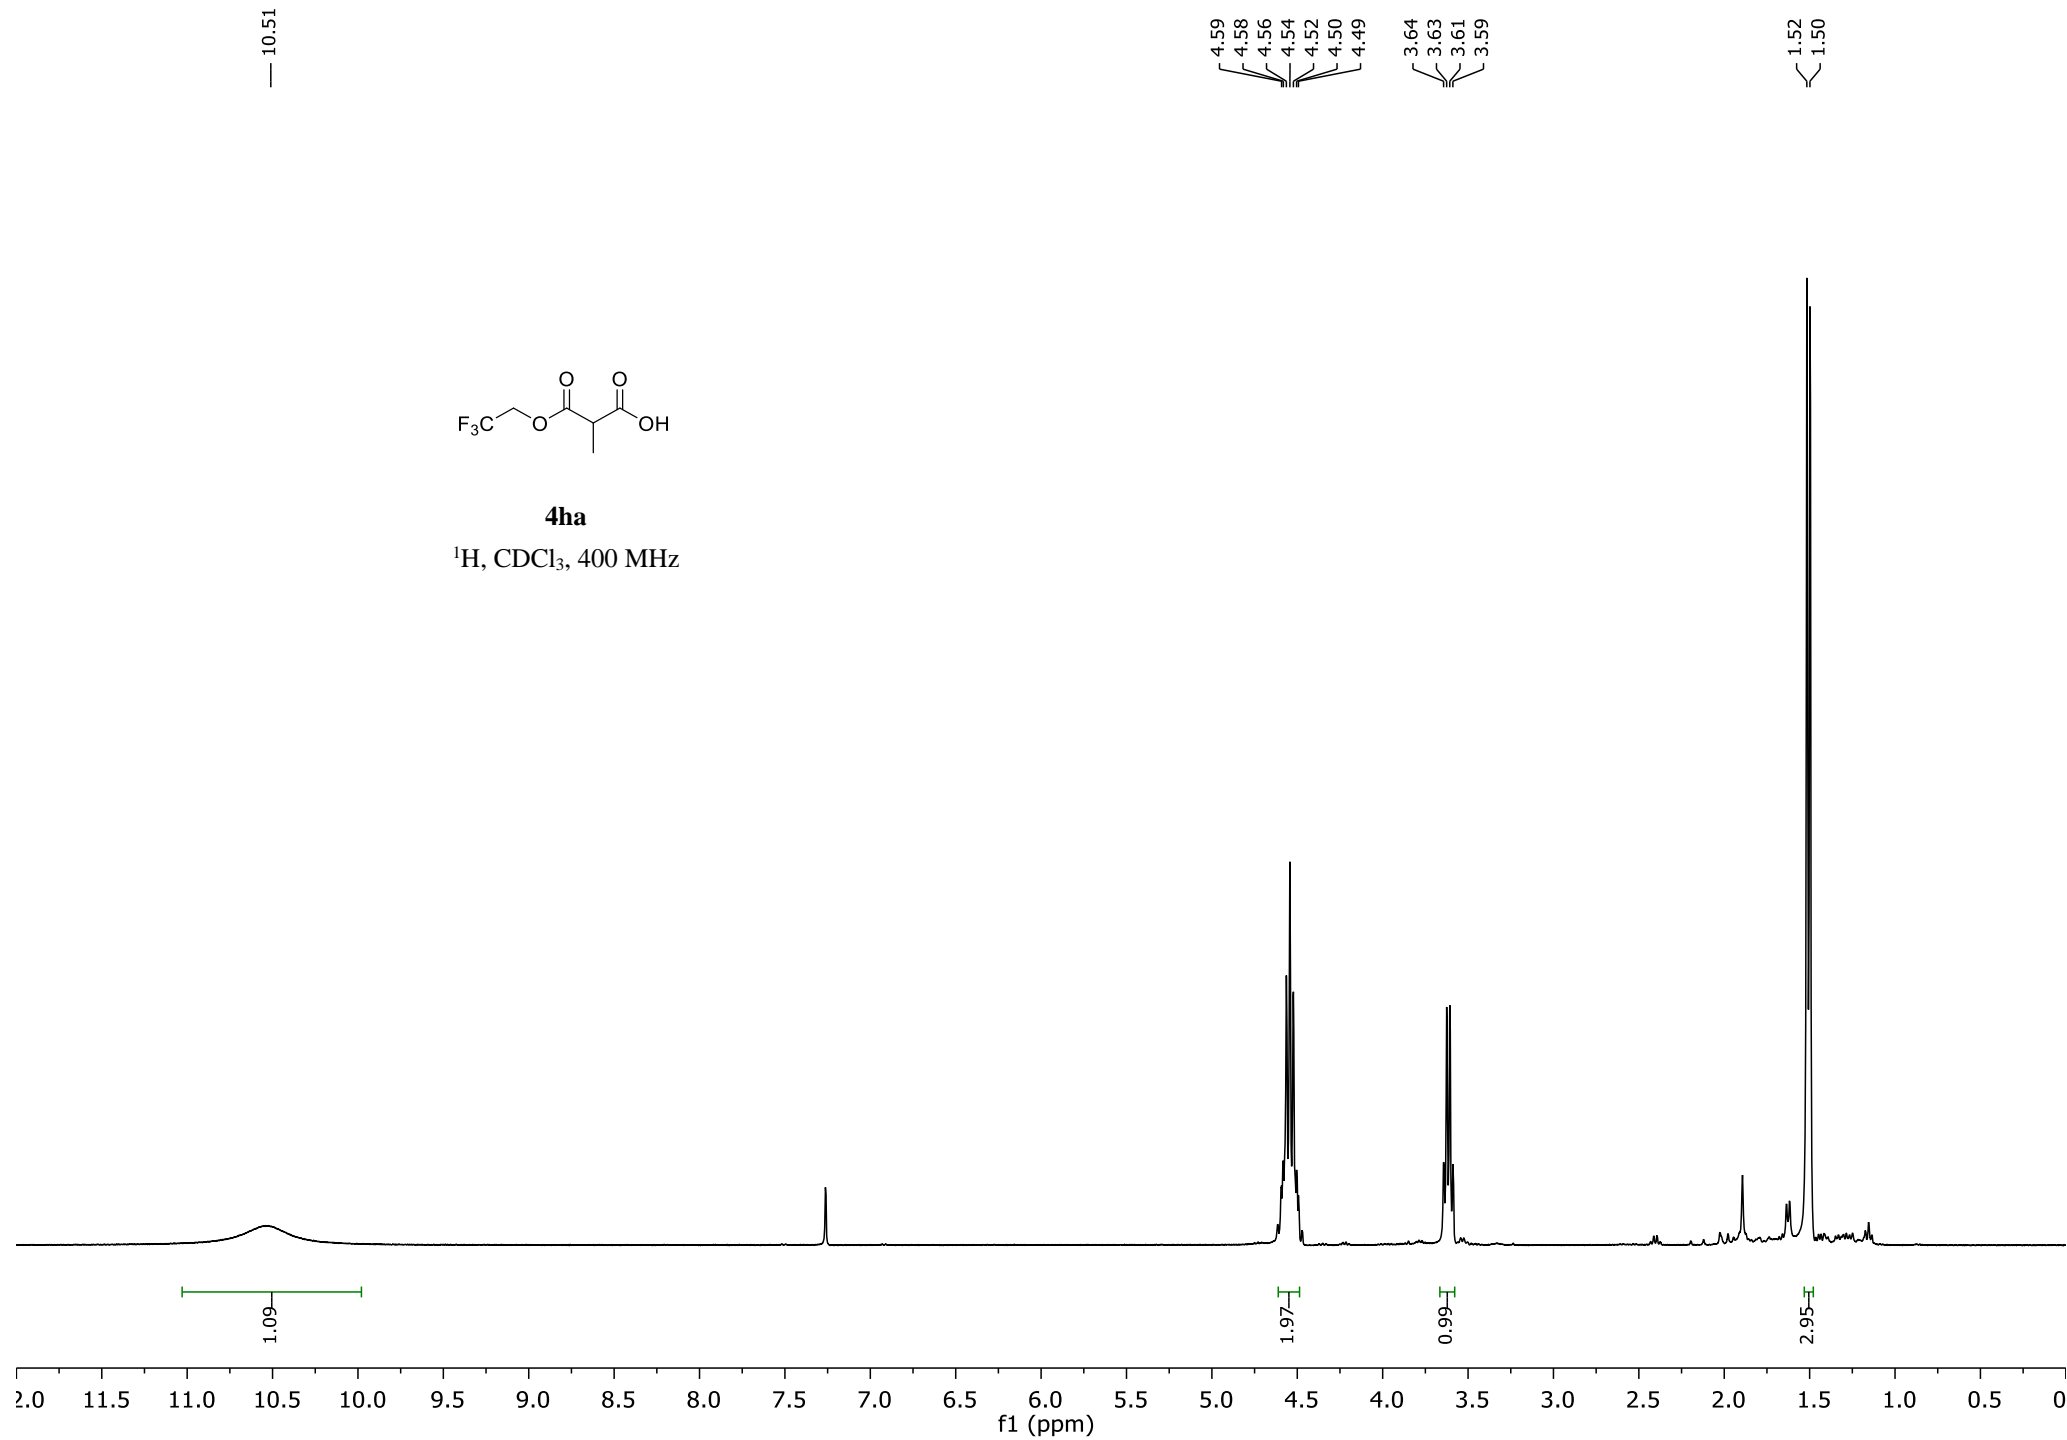



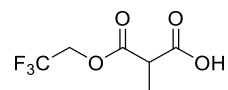

**4ha**

$^{13}\text{C}\{^1\text{H}\}$ ,  $\text{CDCl}_3$ , 400 MHz

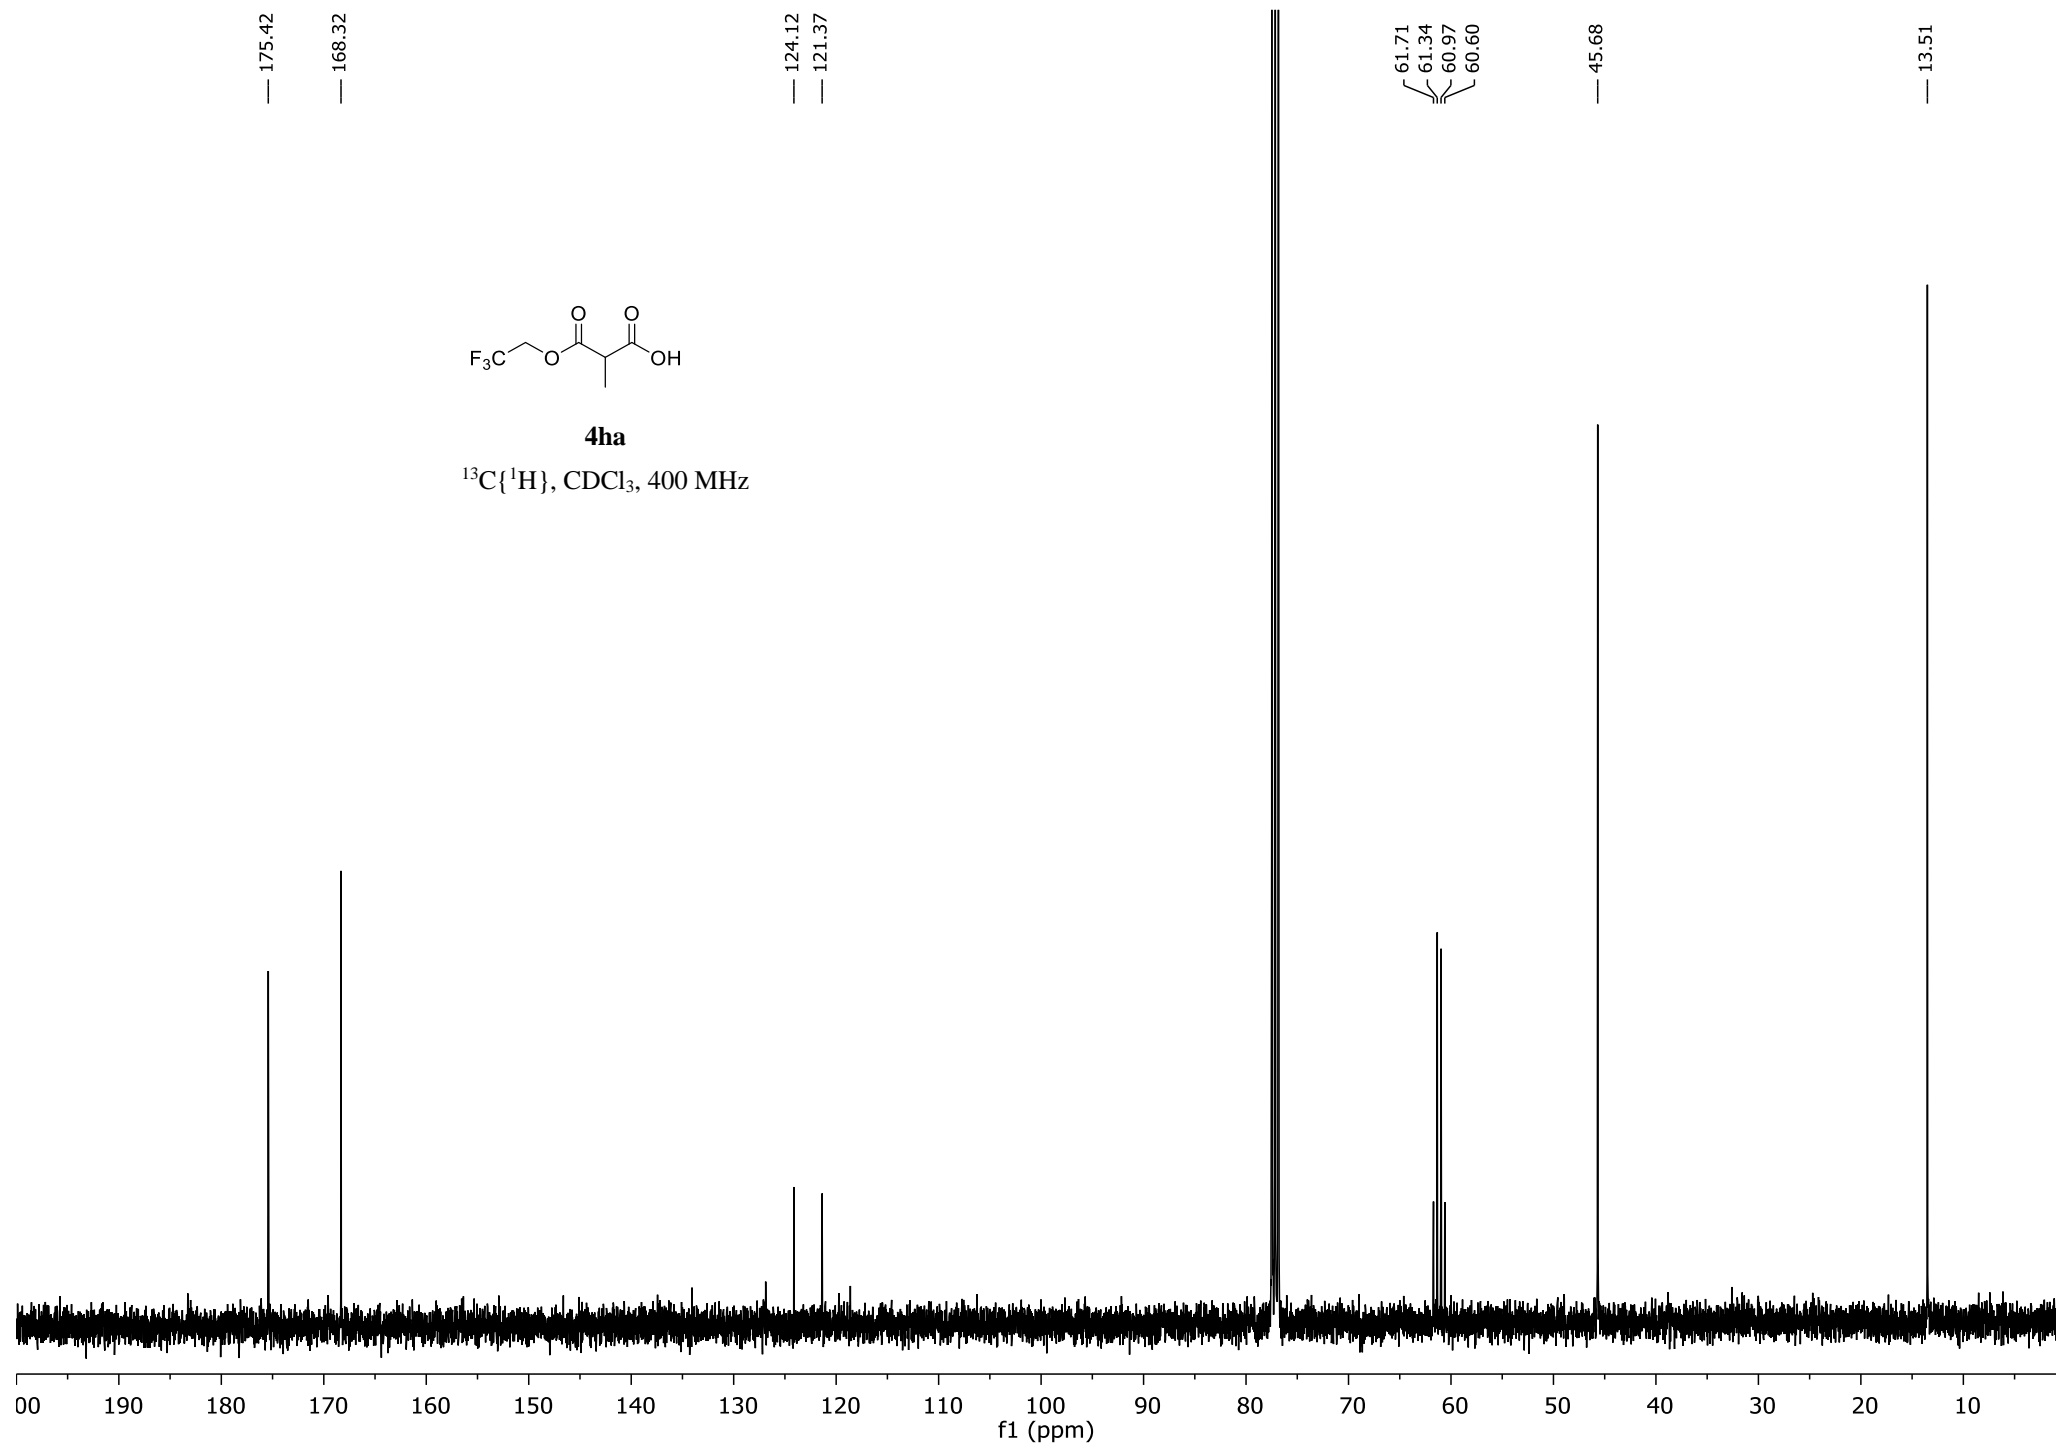

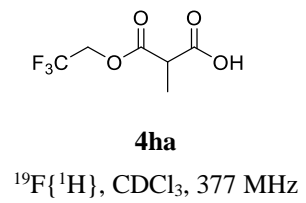

— -73.84

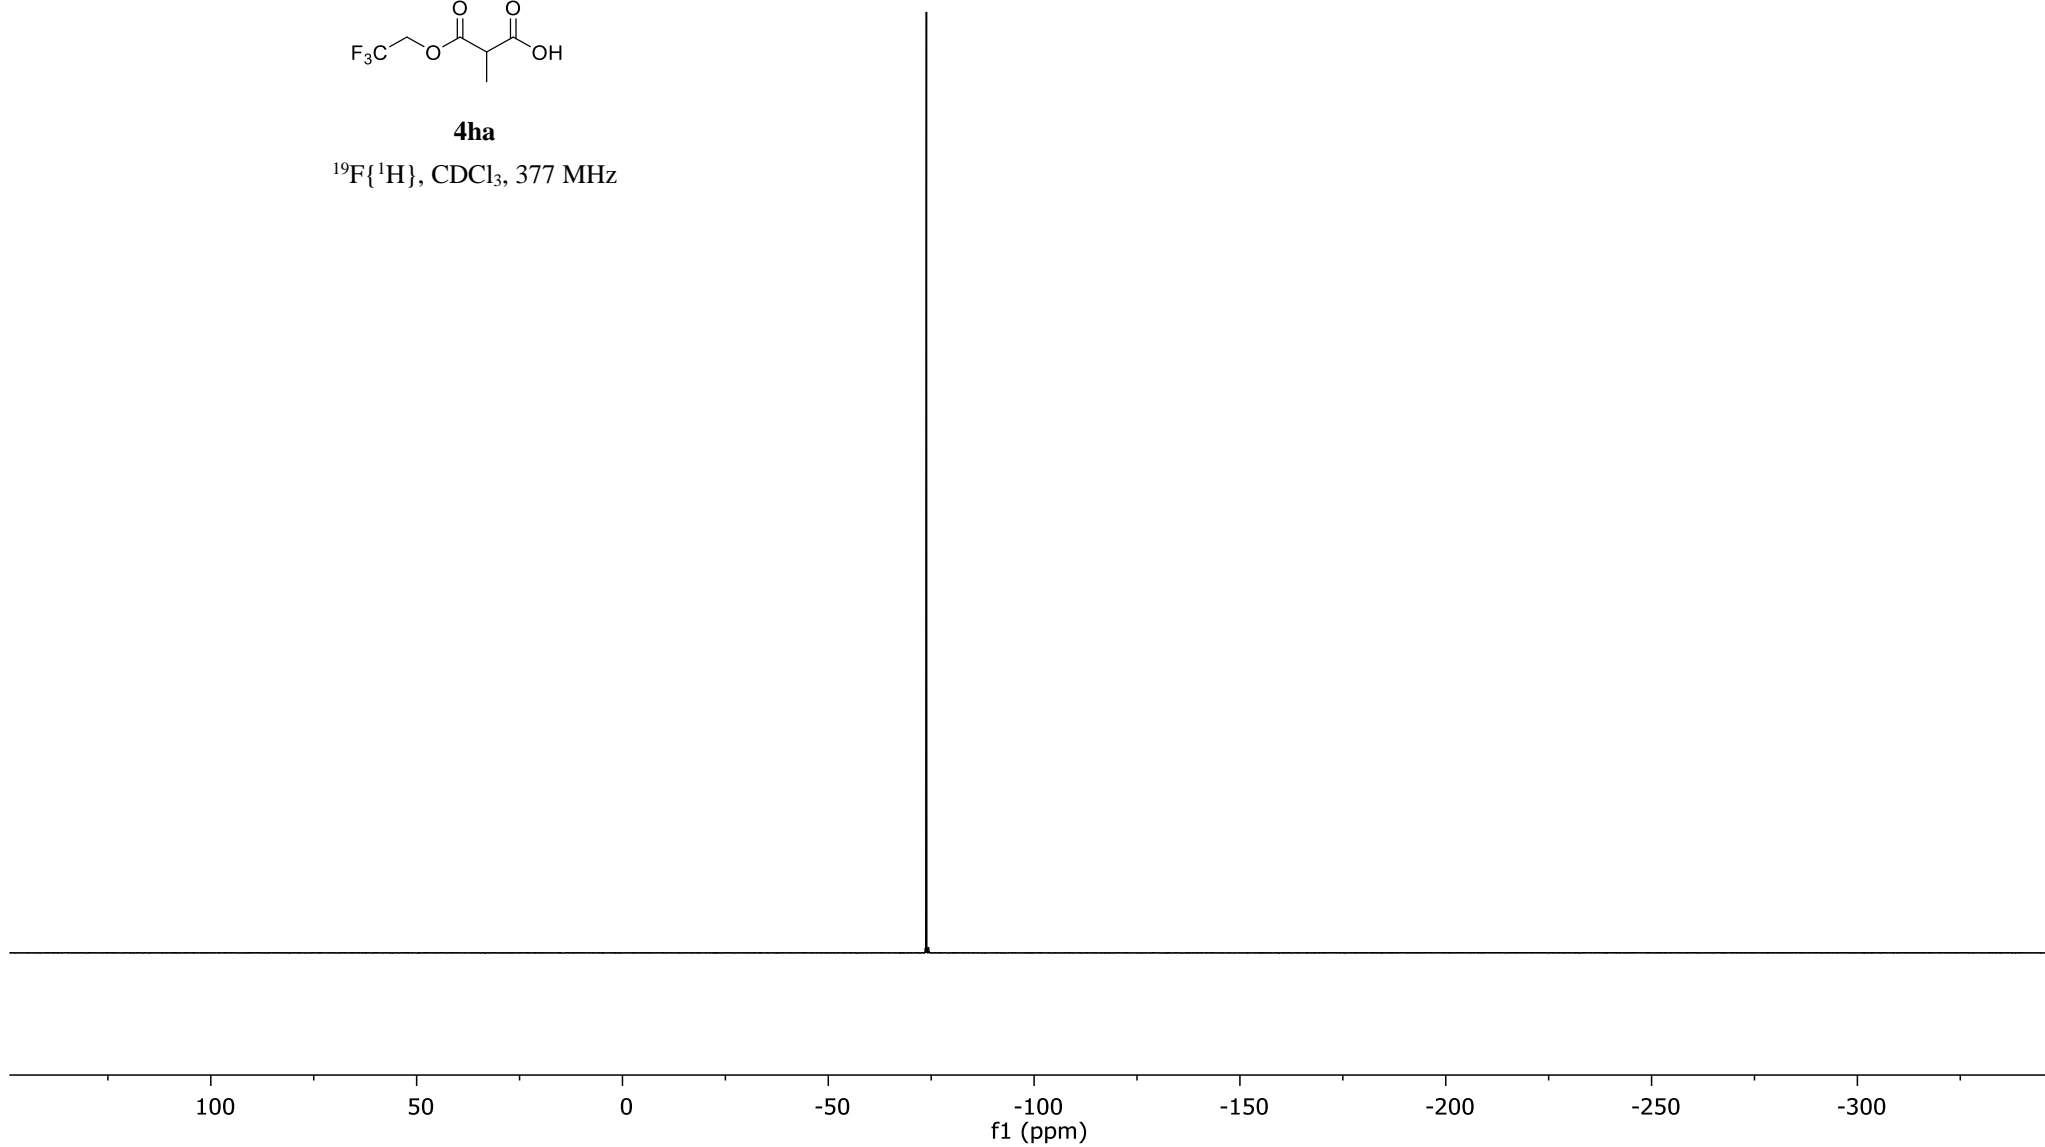

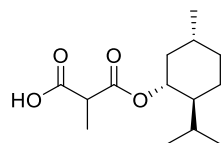

**4ea** (d.r. = 1:1)

<sup>1</sup>H, CDCl<sub>3</sub>, 400 MHz

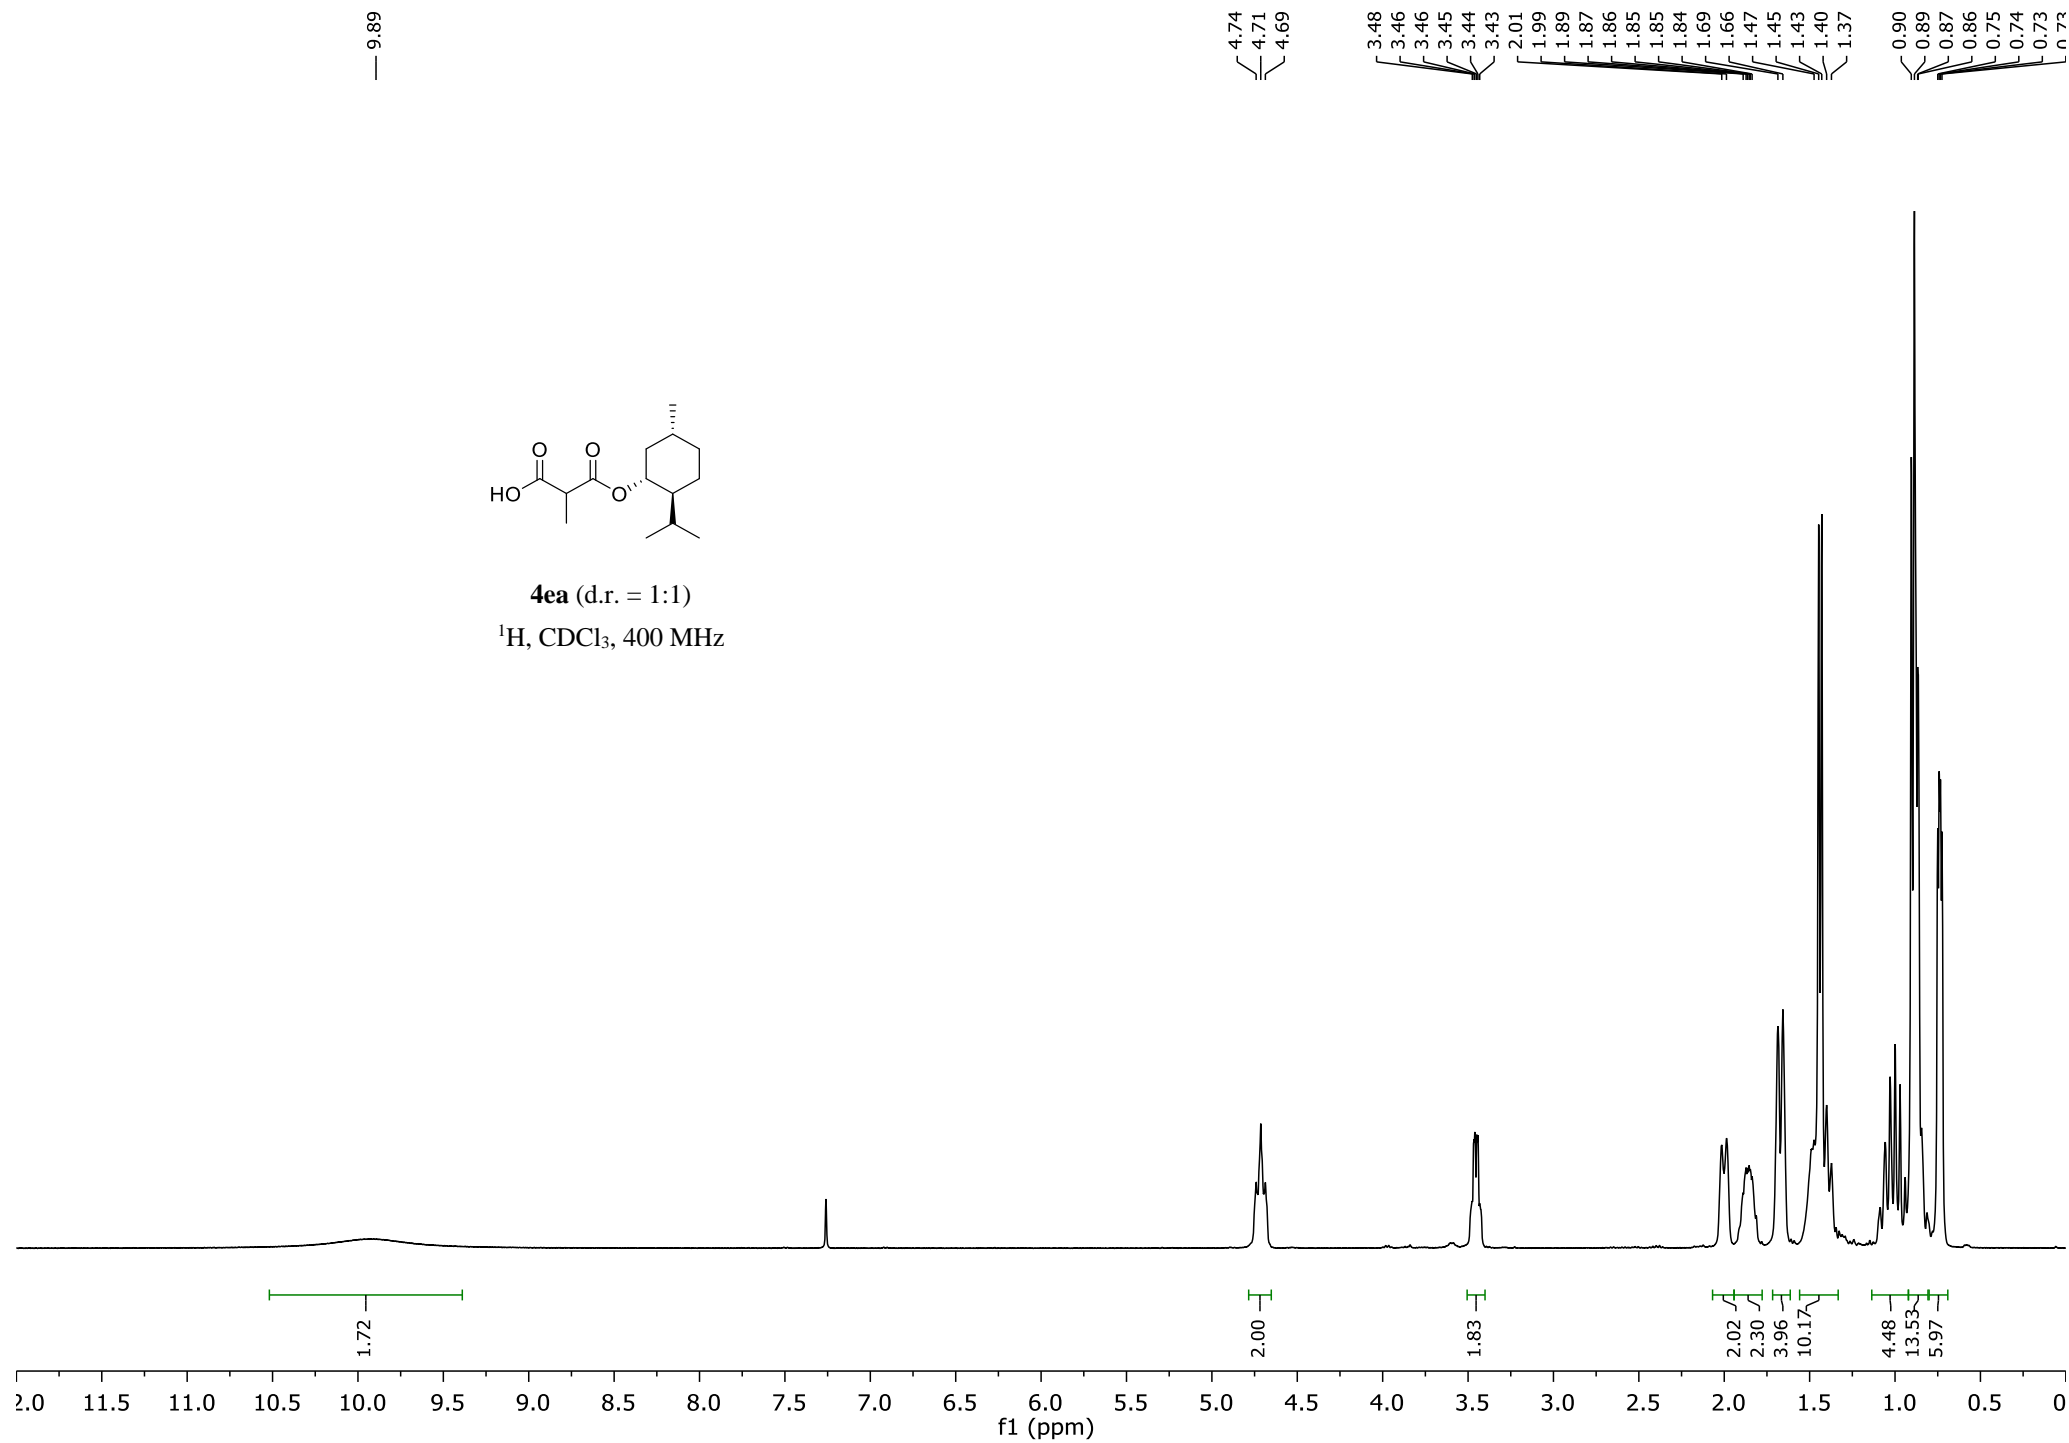

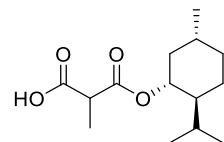

**4ea** (d.r. = 1:1)

$^{13}\text{C}\{^1\text{H}\}$ ,  $\text{CDCl}_3$ , 400 MHz

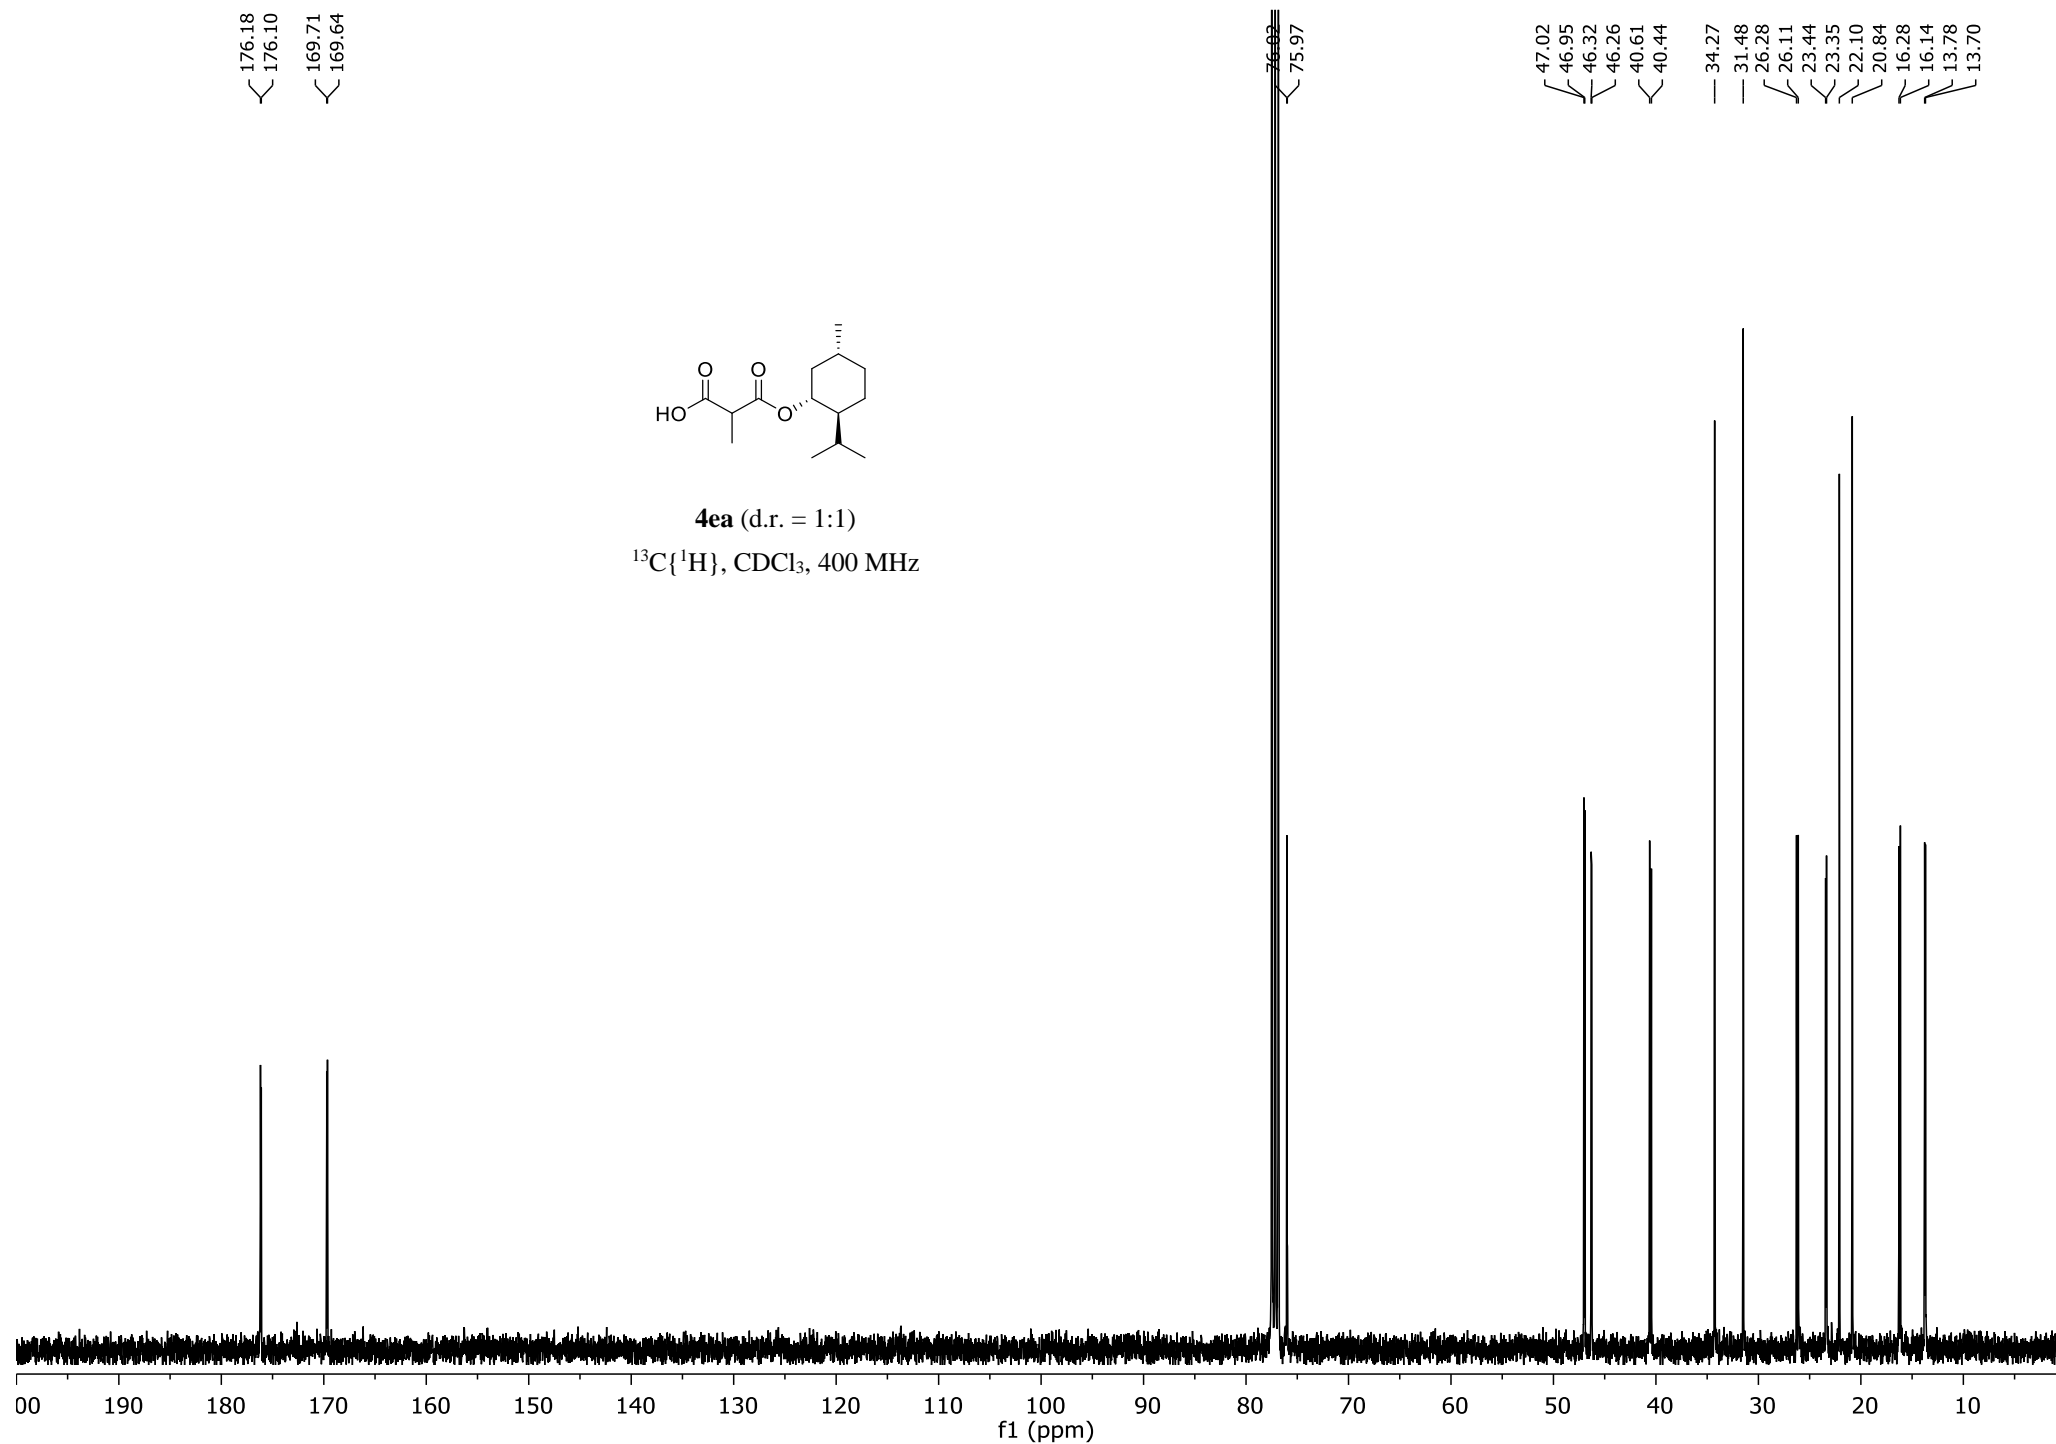

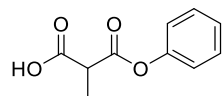

**4ia**

$^1\text{H}$ ,  $\text{CDCl}_3$ , 400 MHz

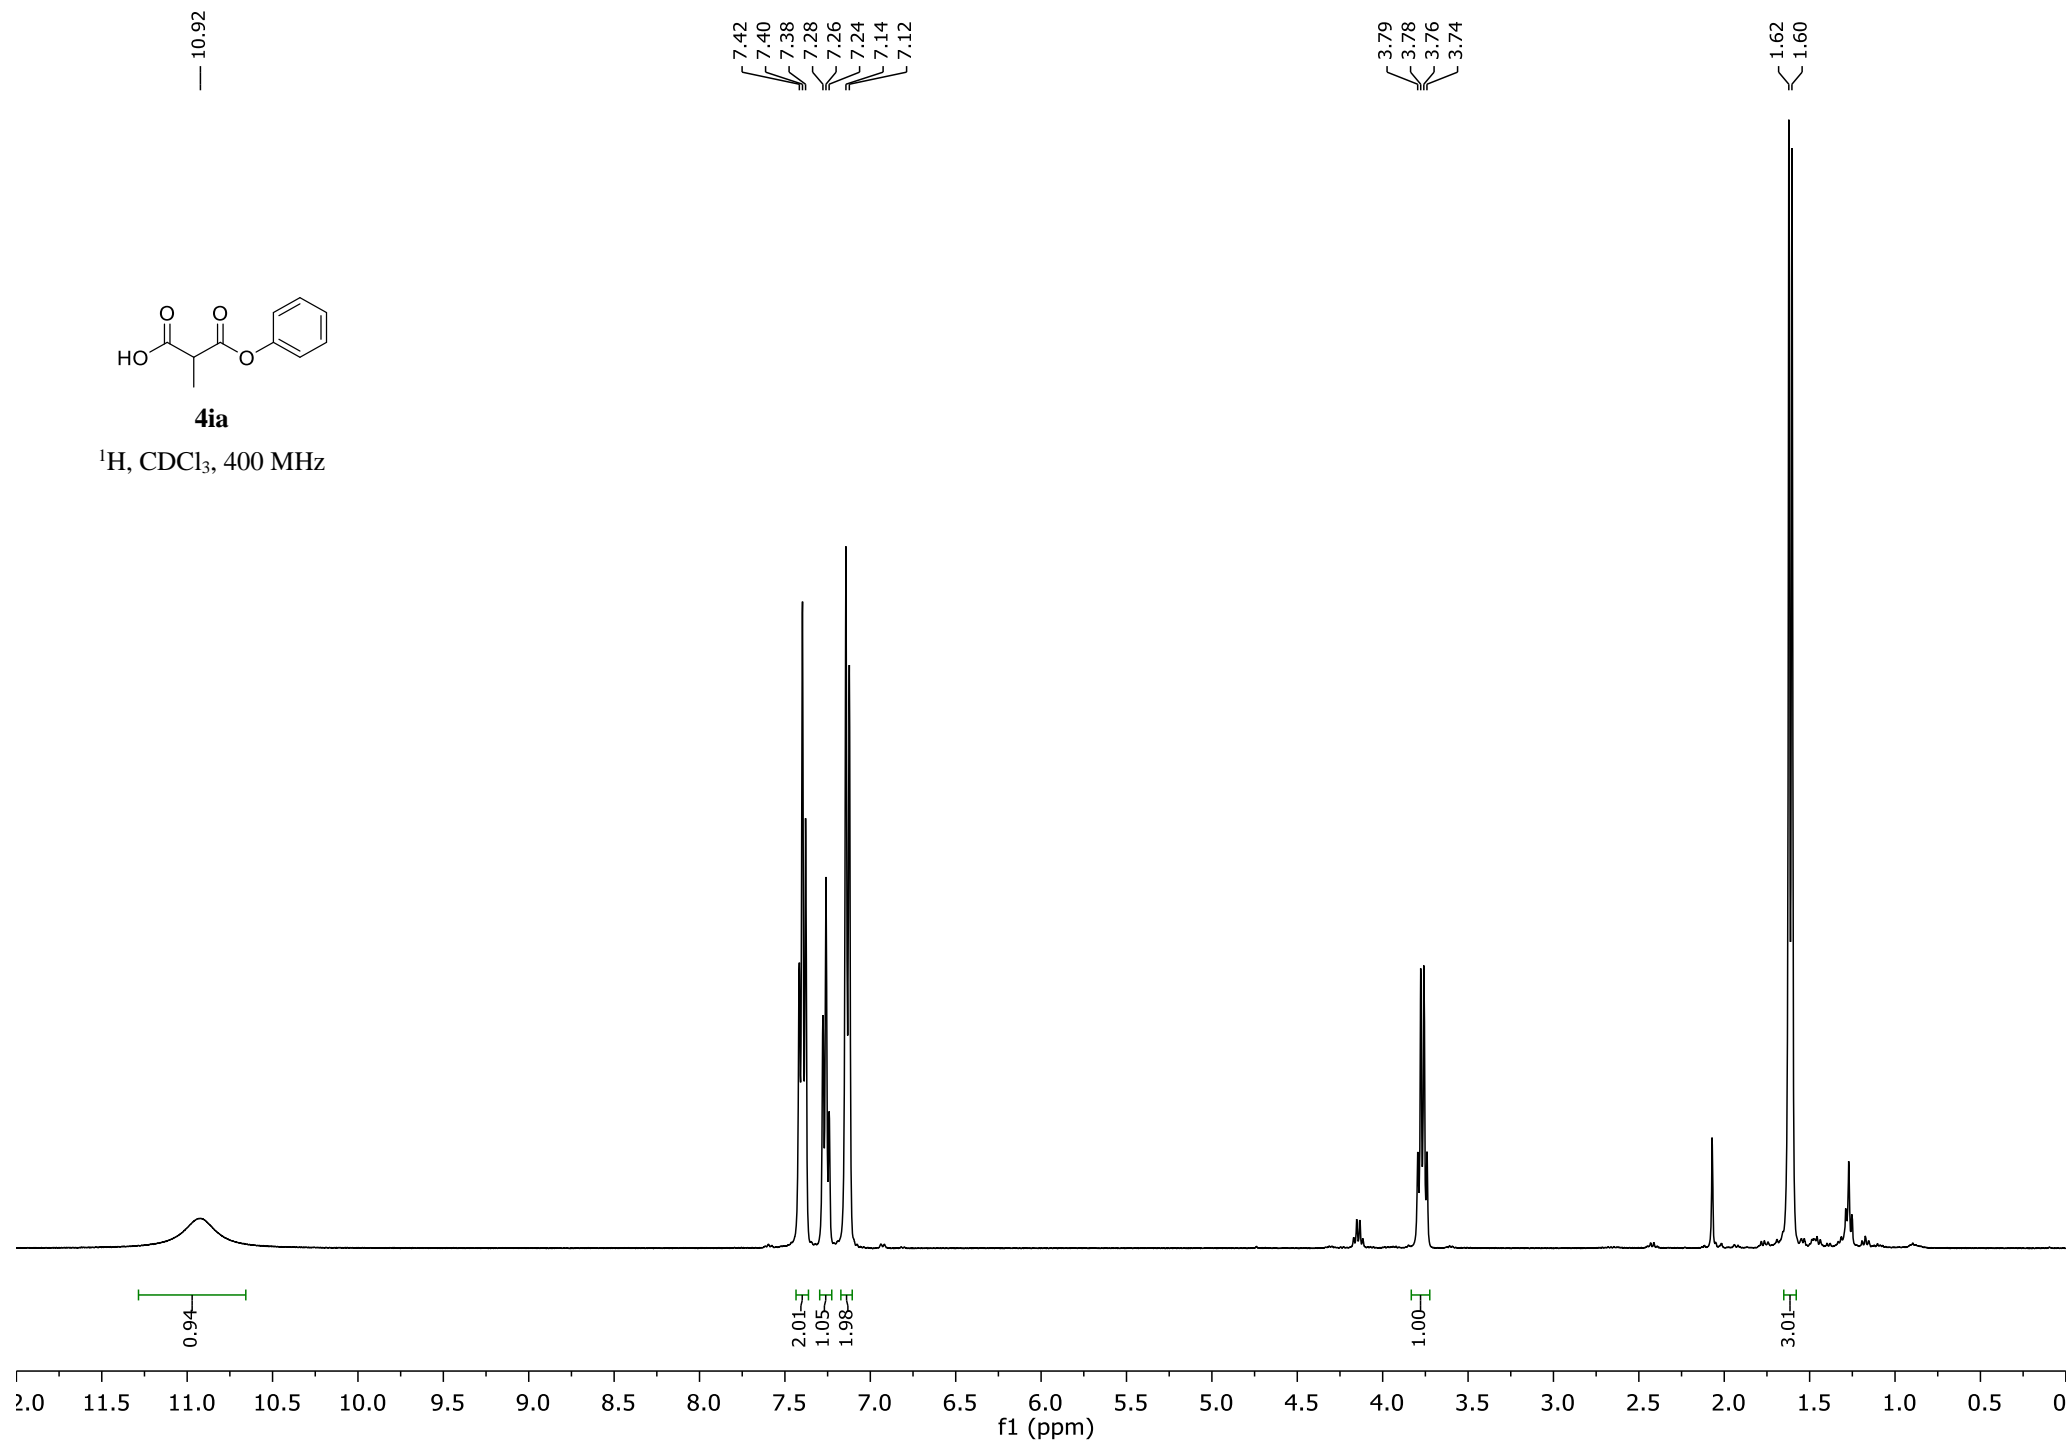

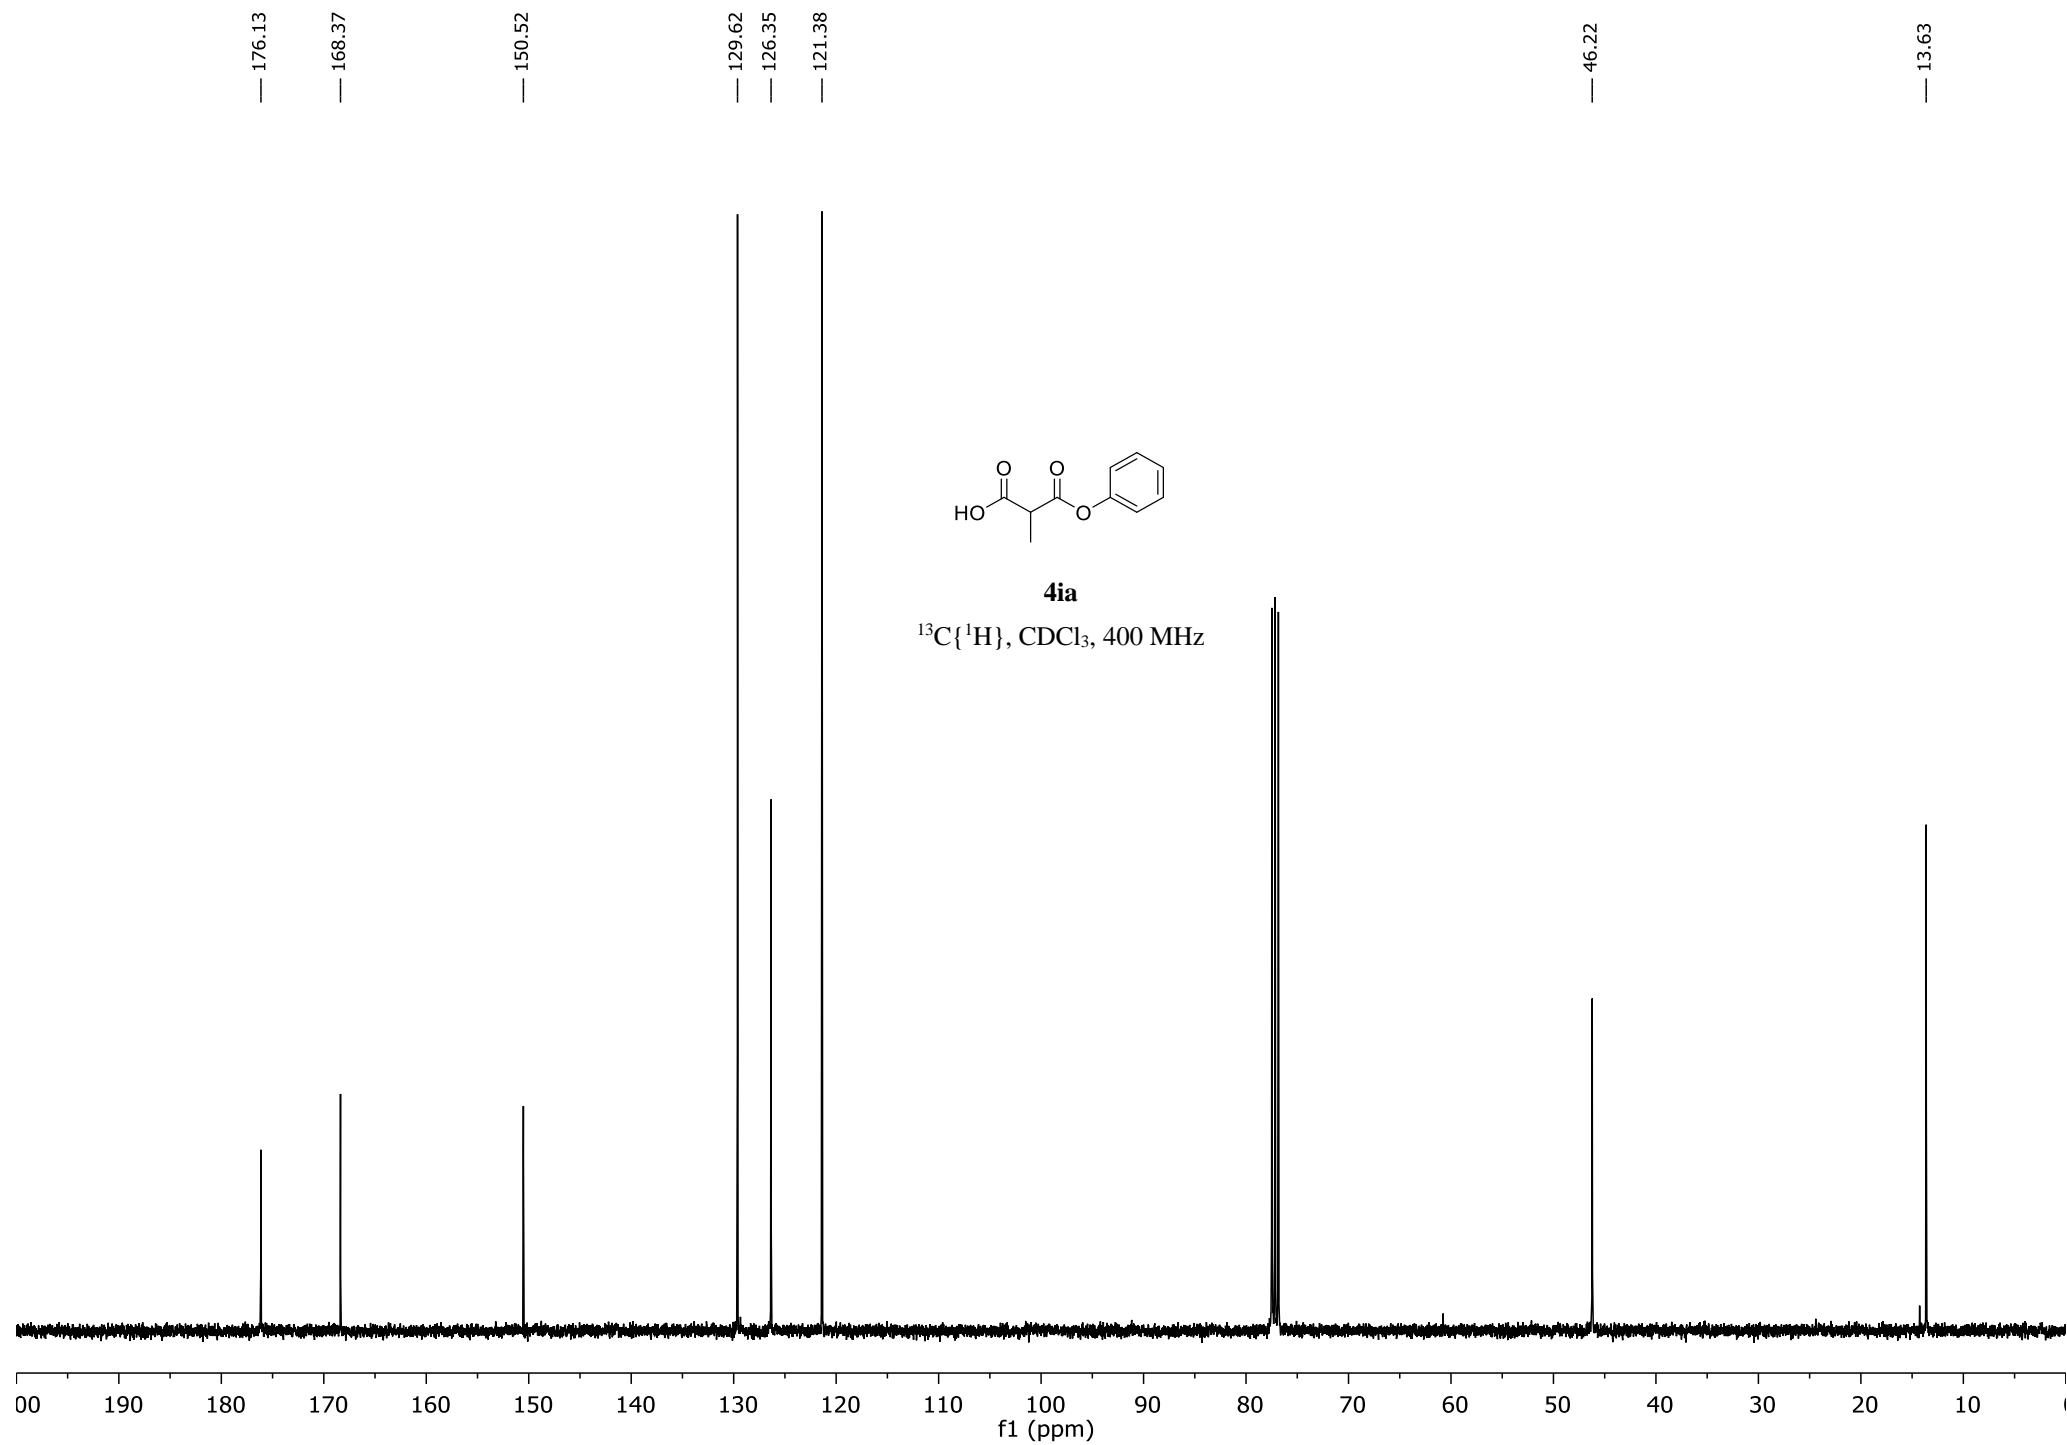

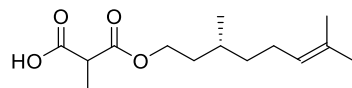

**4ja**

<sup>1</sup>H, CDCl<sub>3</sub>, 400 MHz

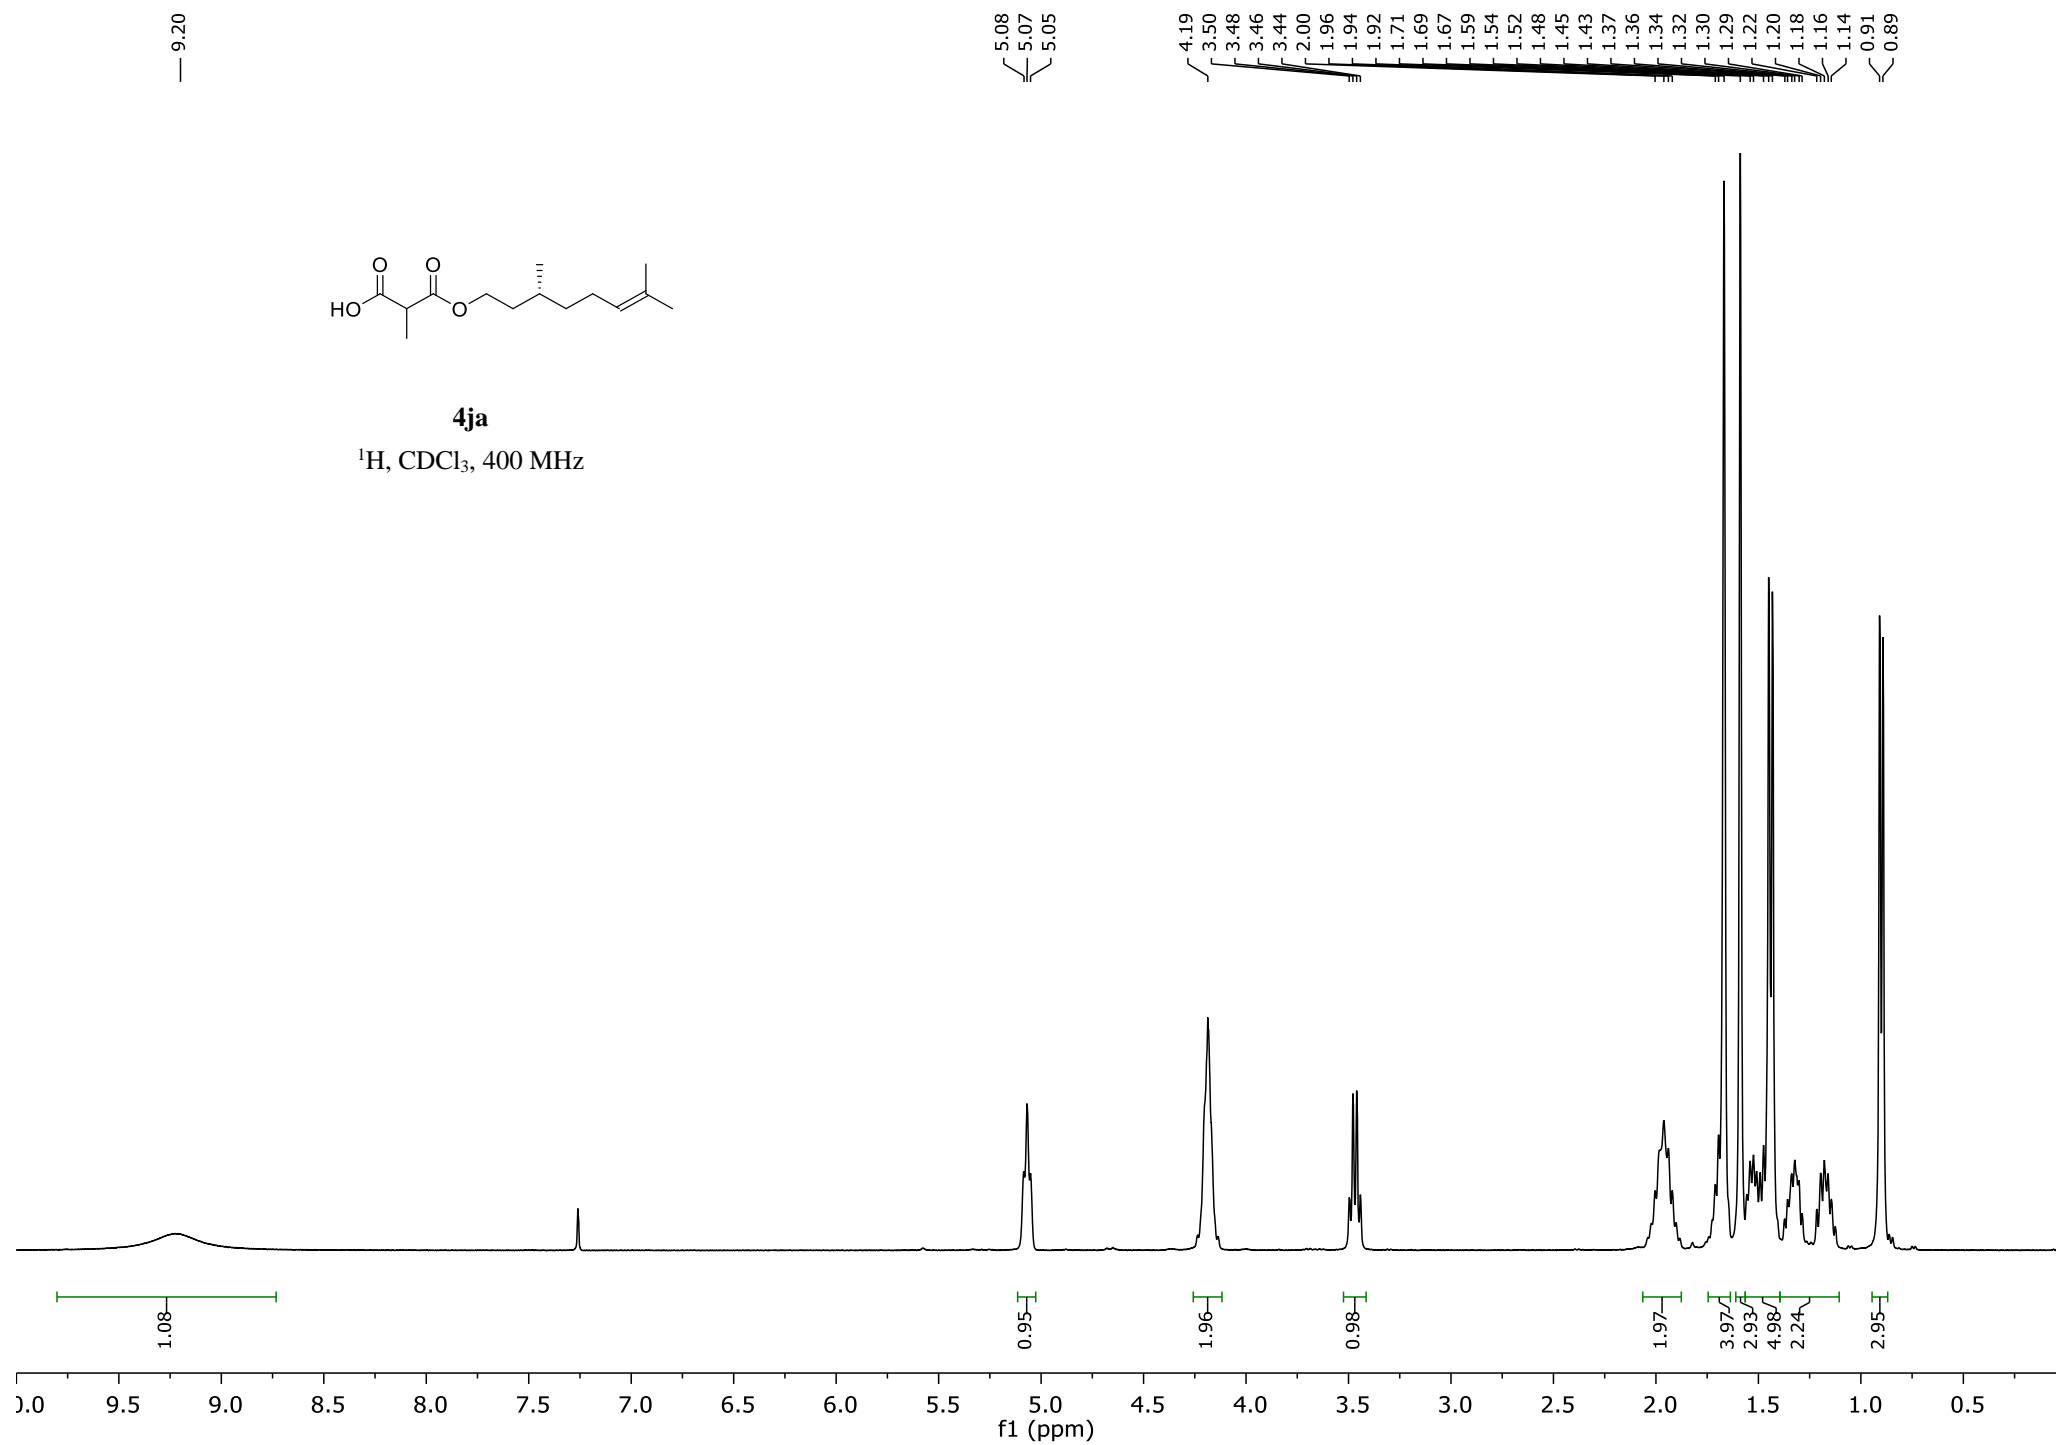

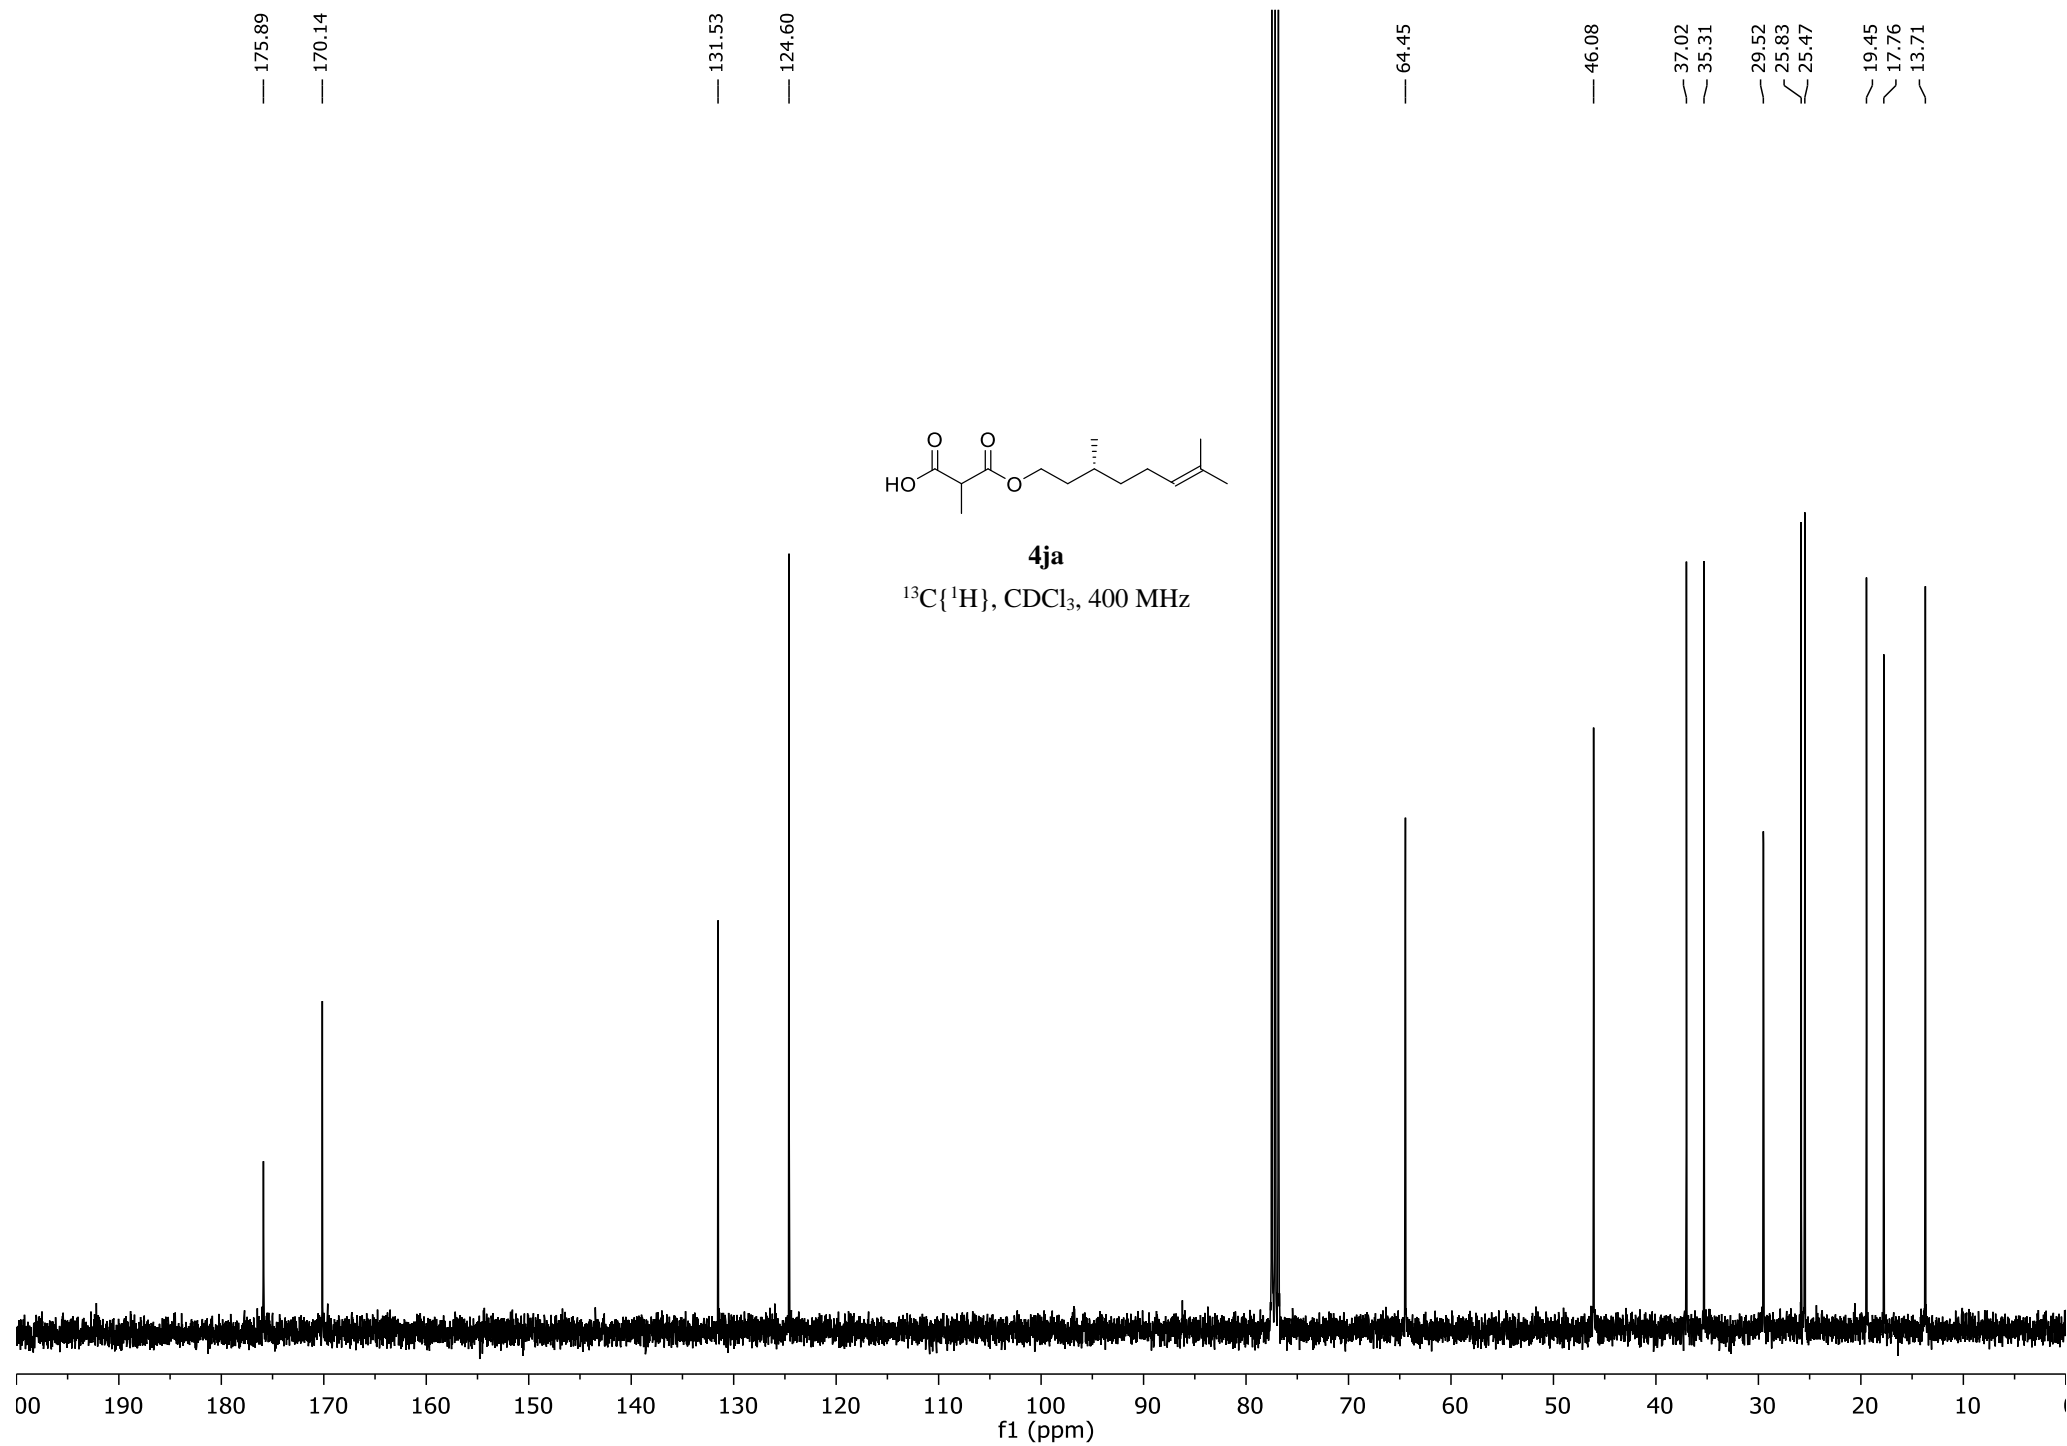



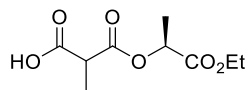

**4ka** (d.r. = 1:1)

$^1\text{H}$ ,  $\text{CDCl}_3$ , 400 MHz

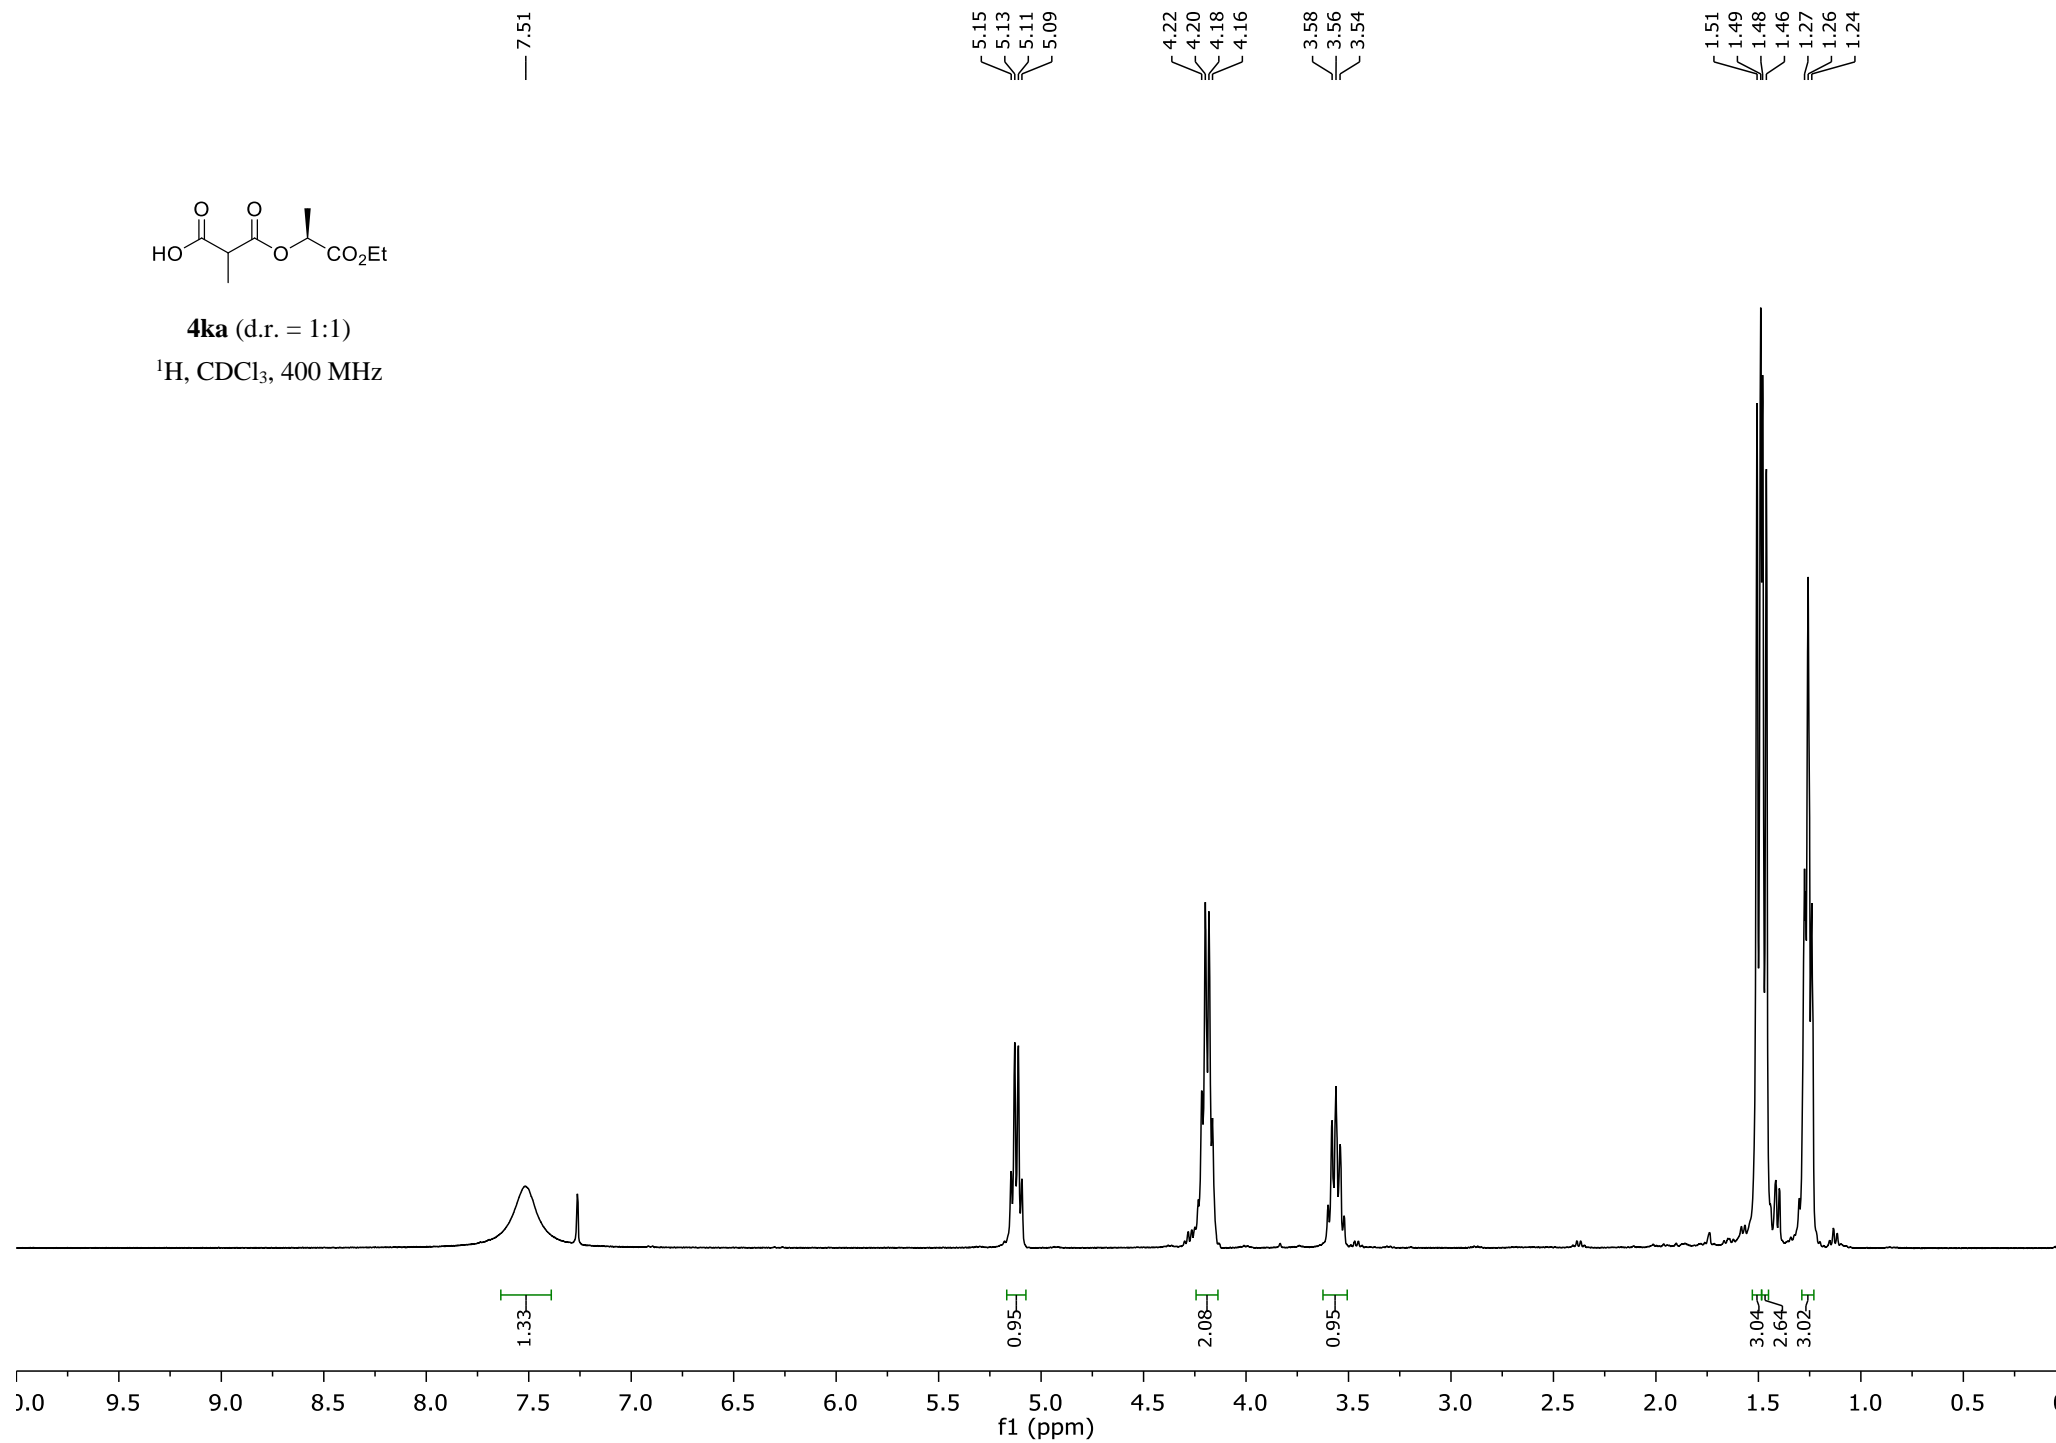

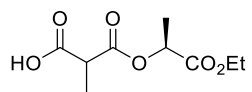

**4ka** (d.r. = 1:1)

$^{13}\text{C}\{^1\text{H}\}$ ,  $\text{CDCl}_3$ , 400 MHz

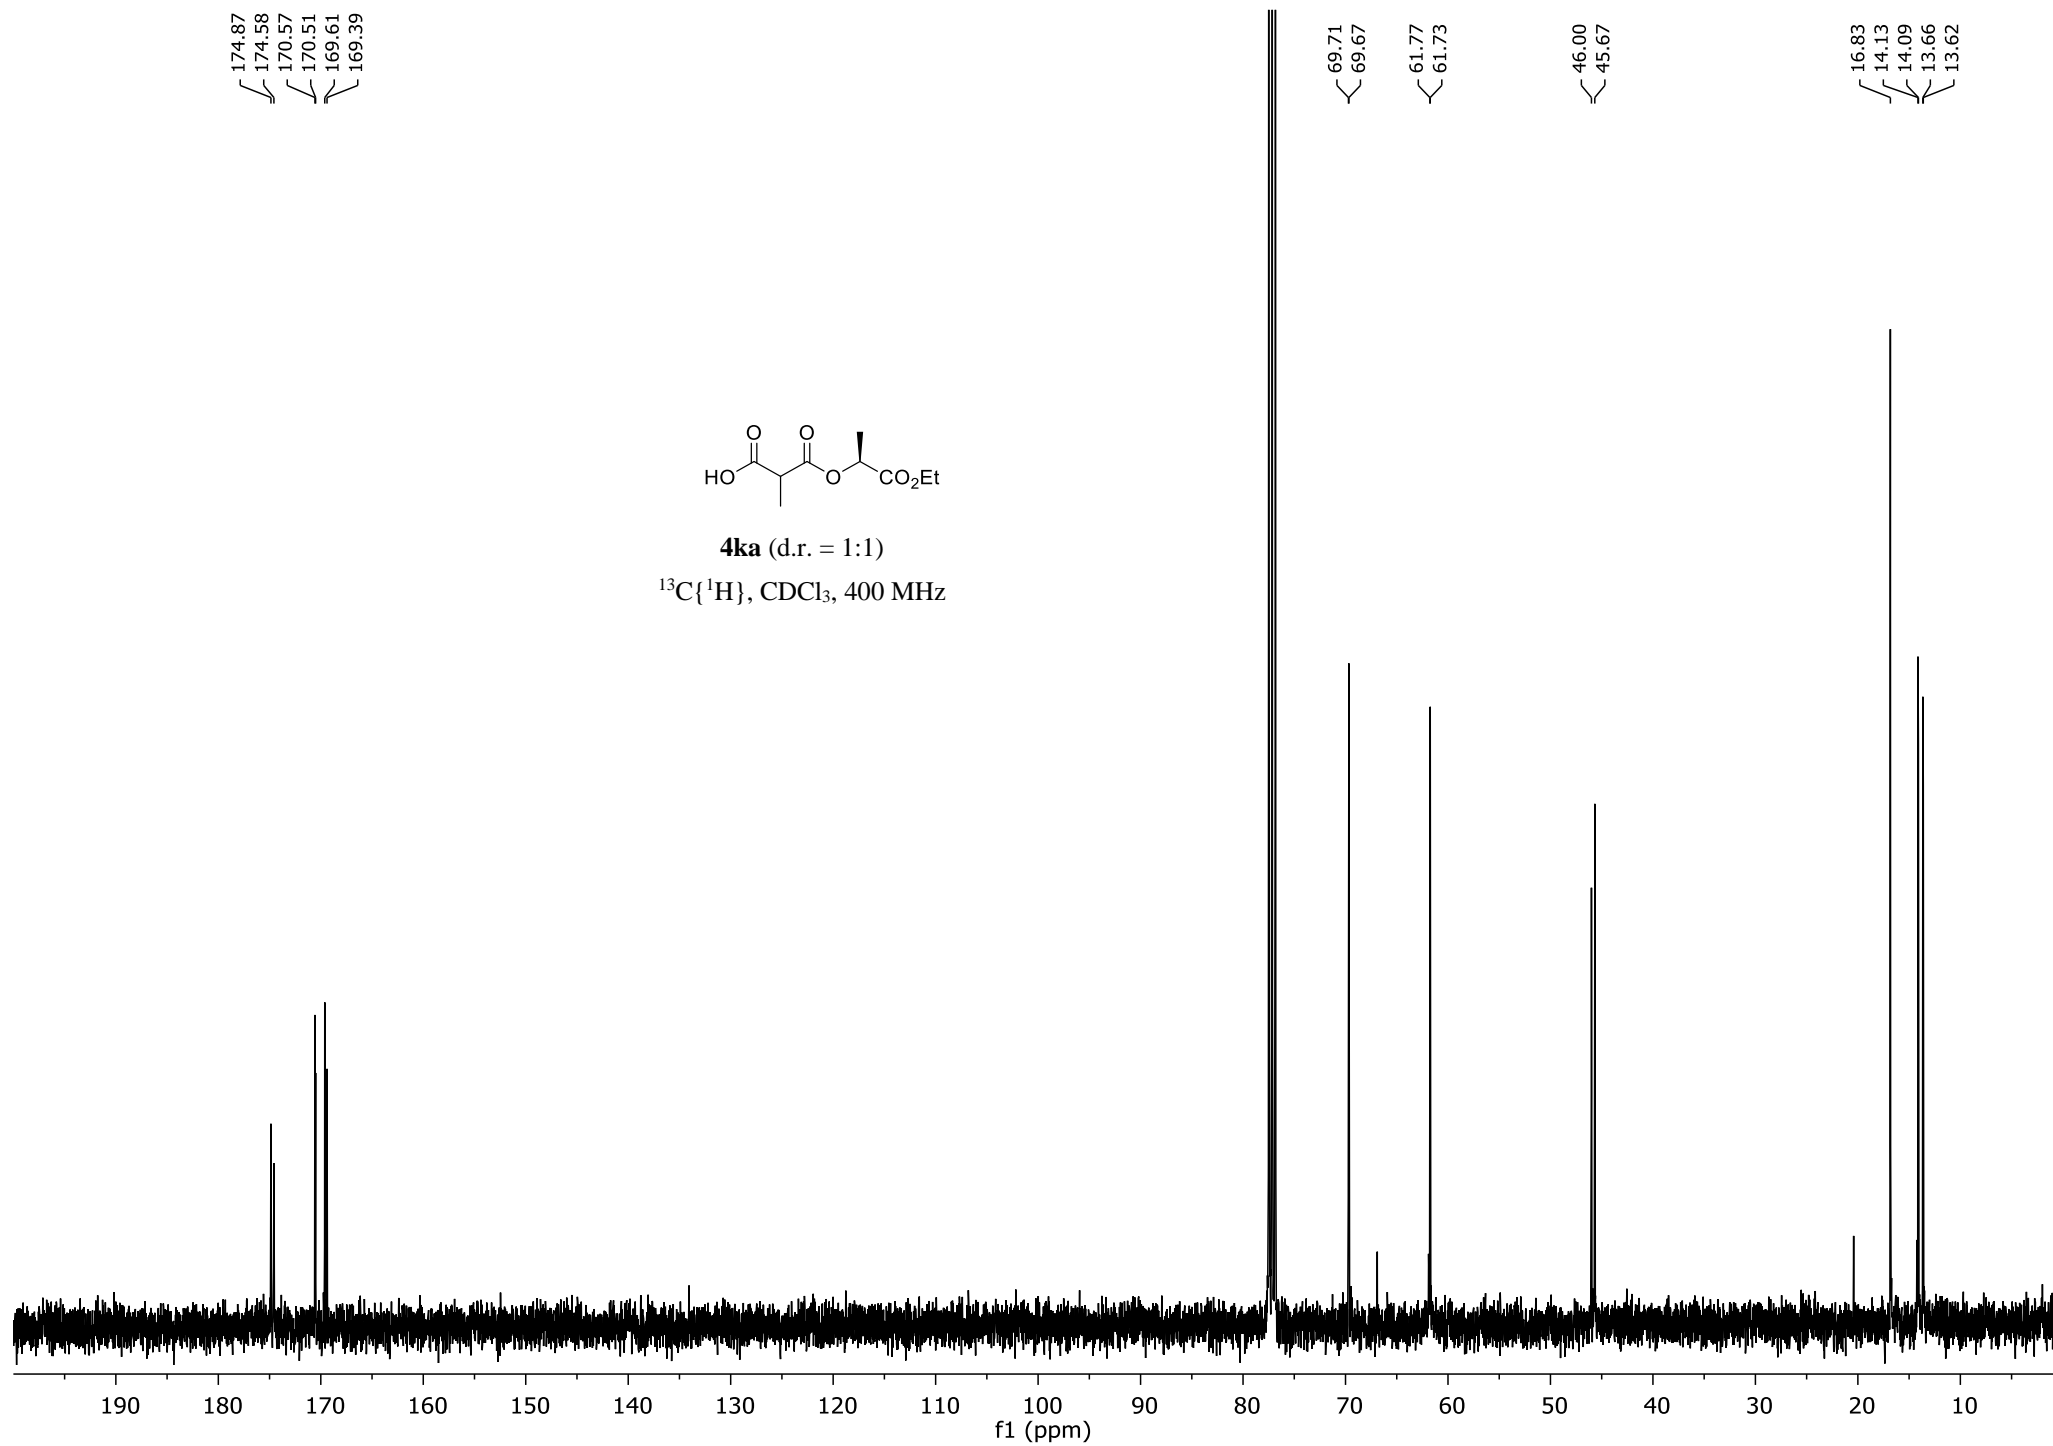

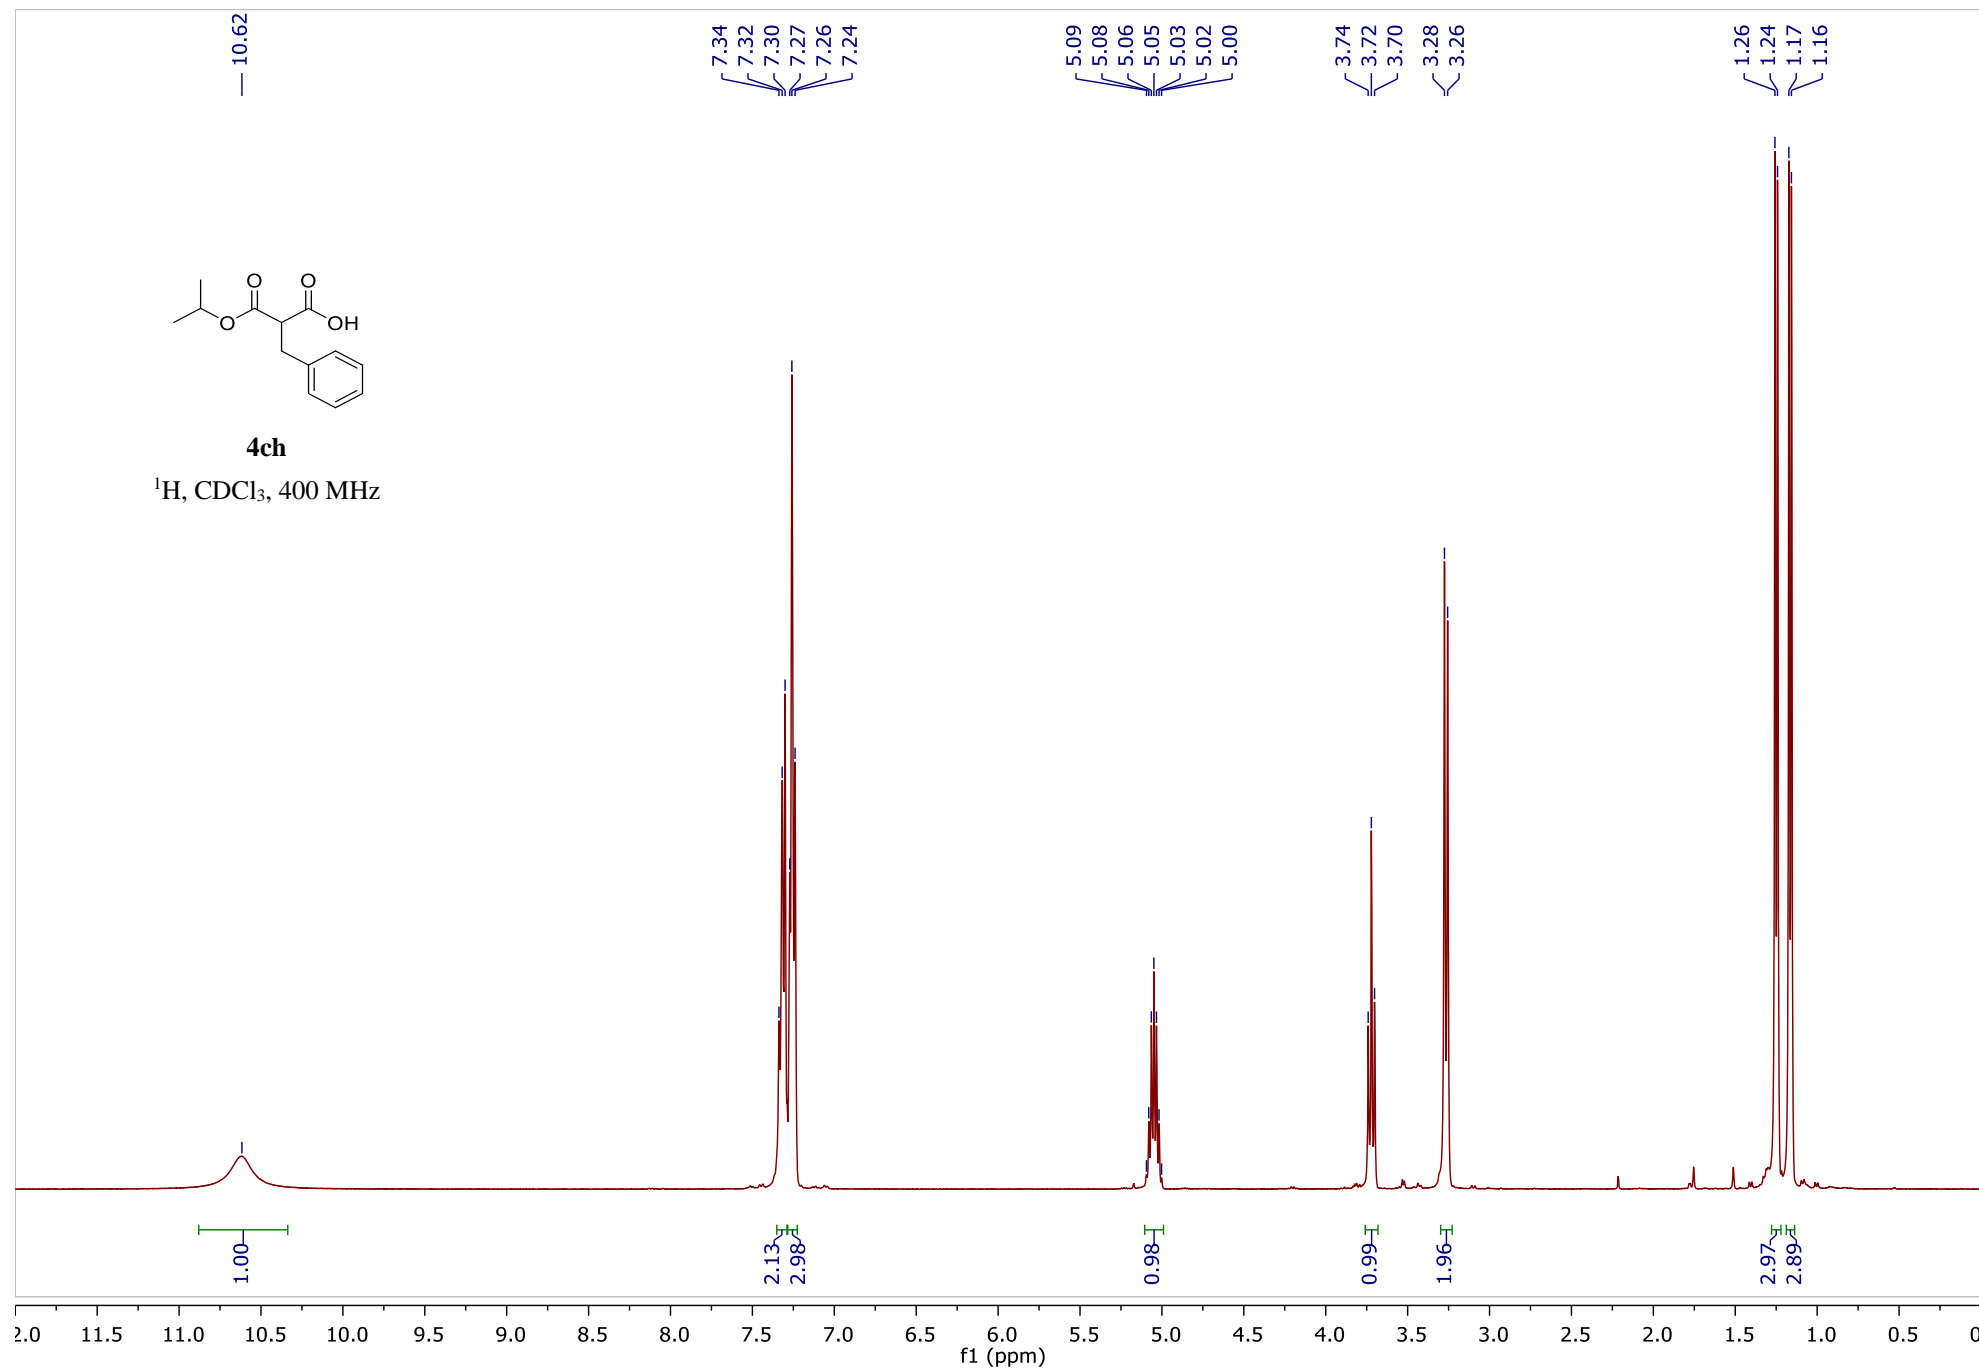

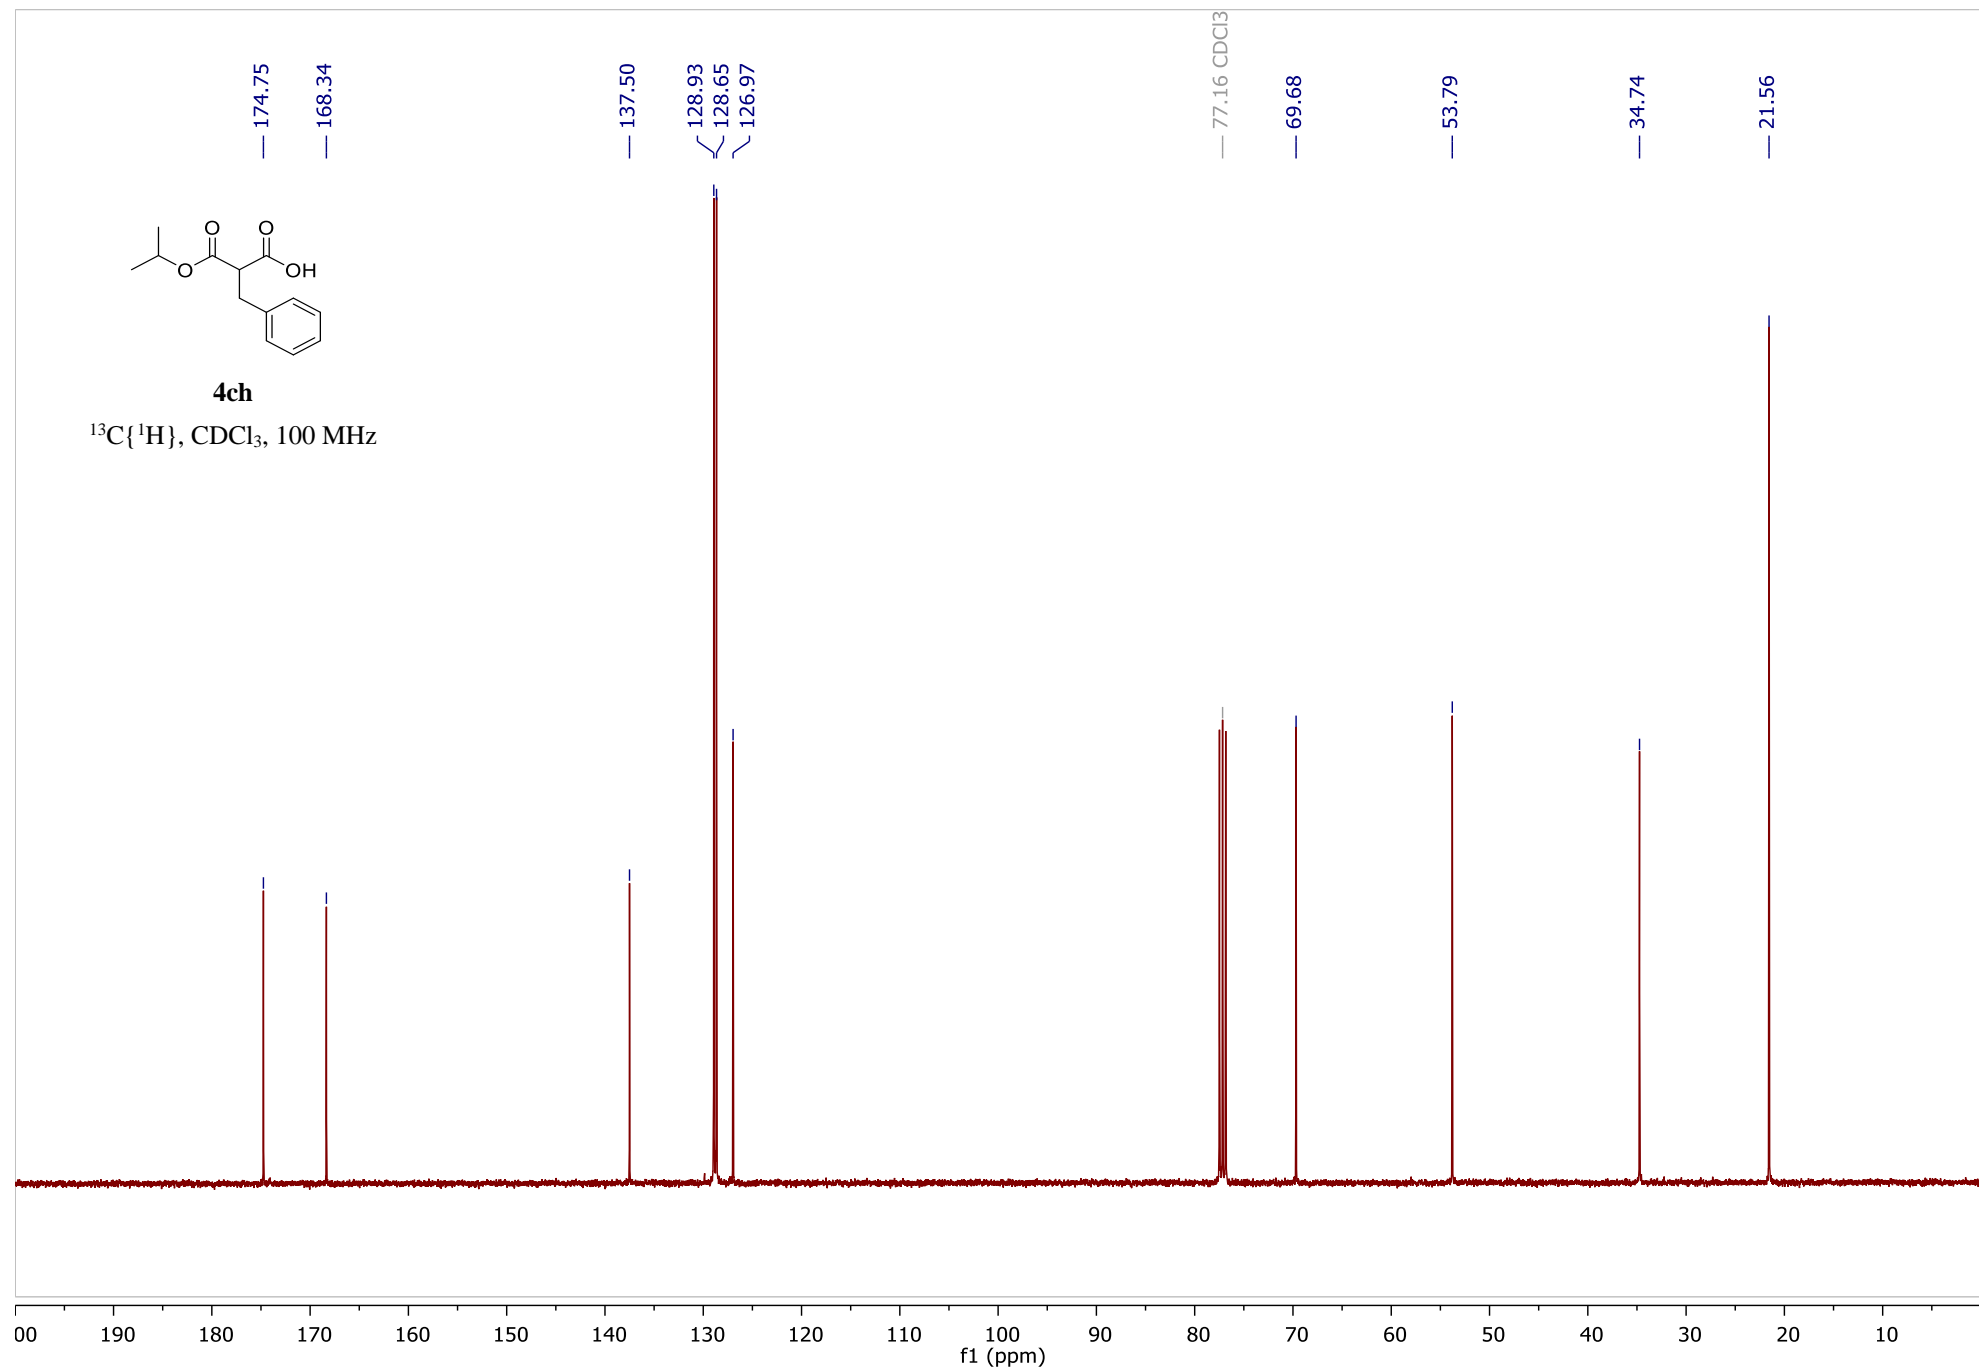

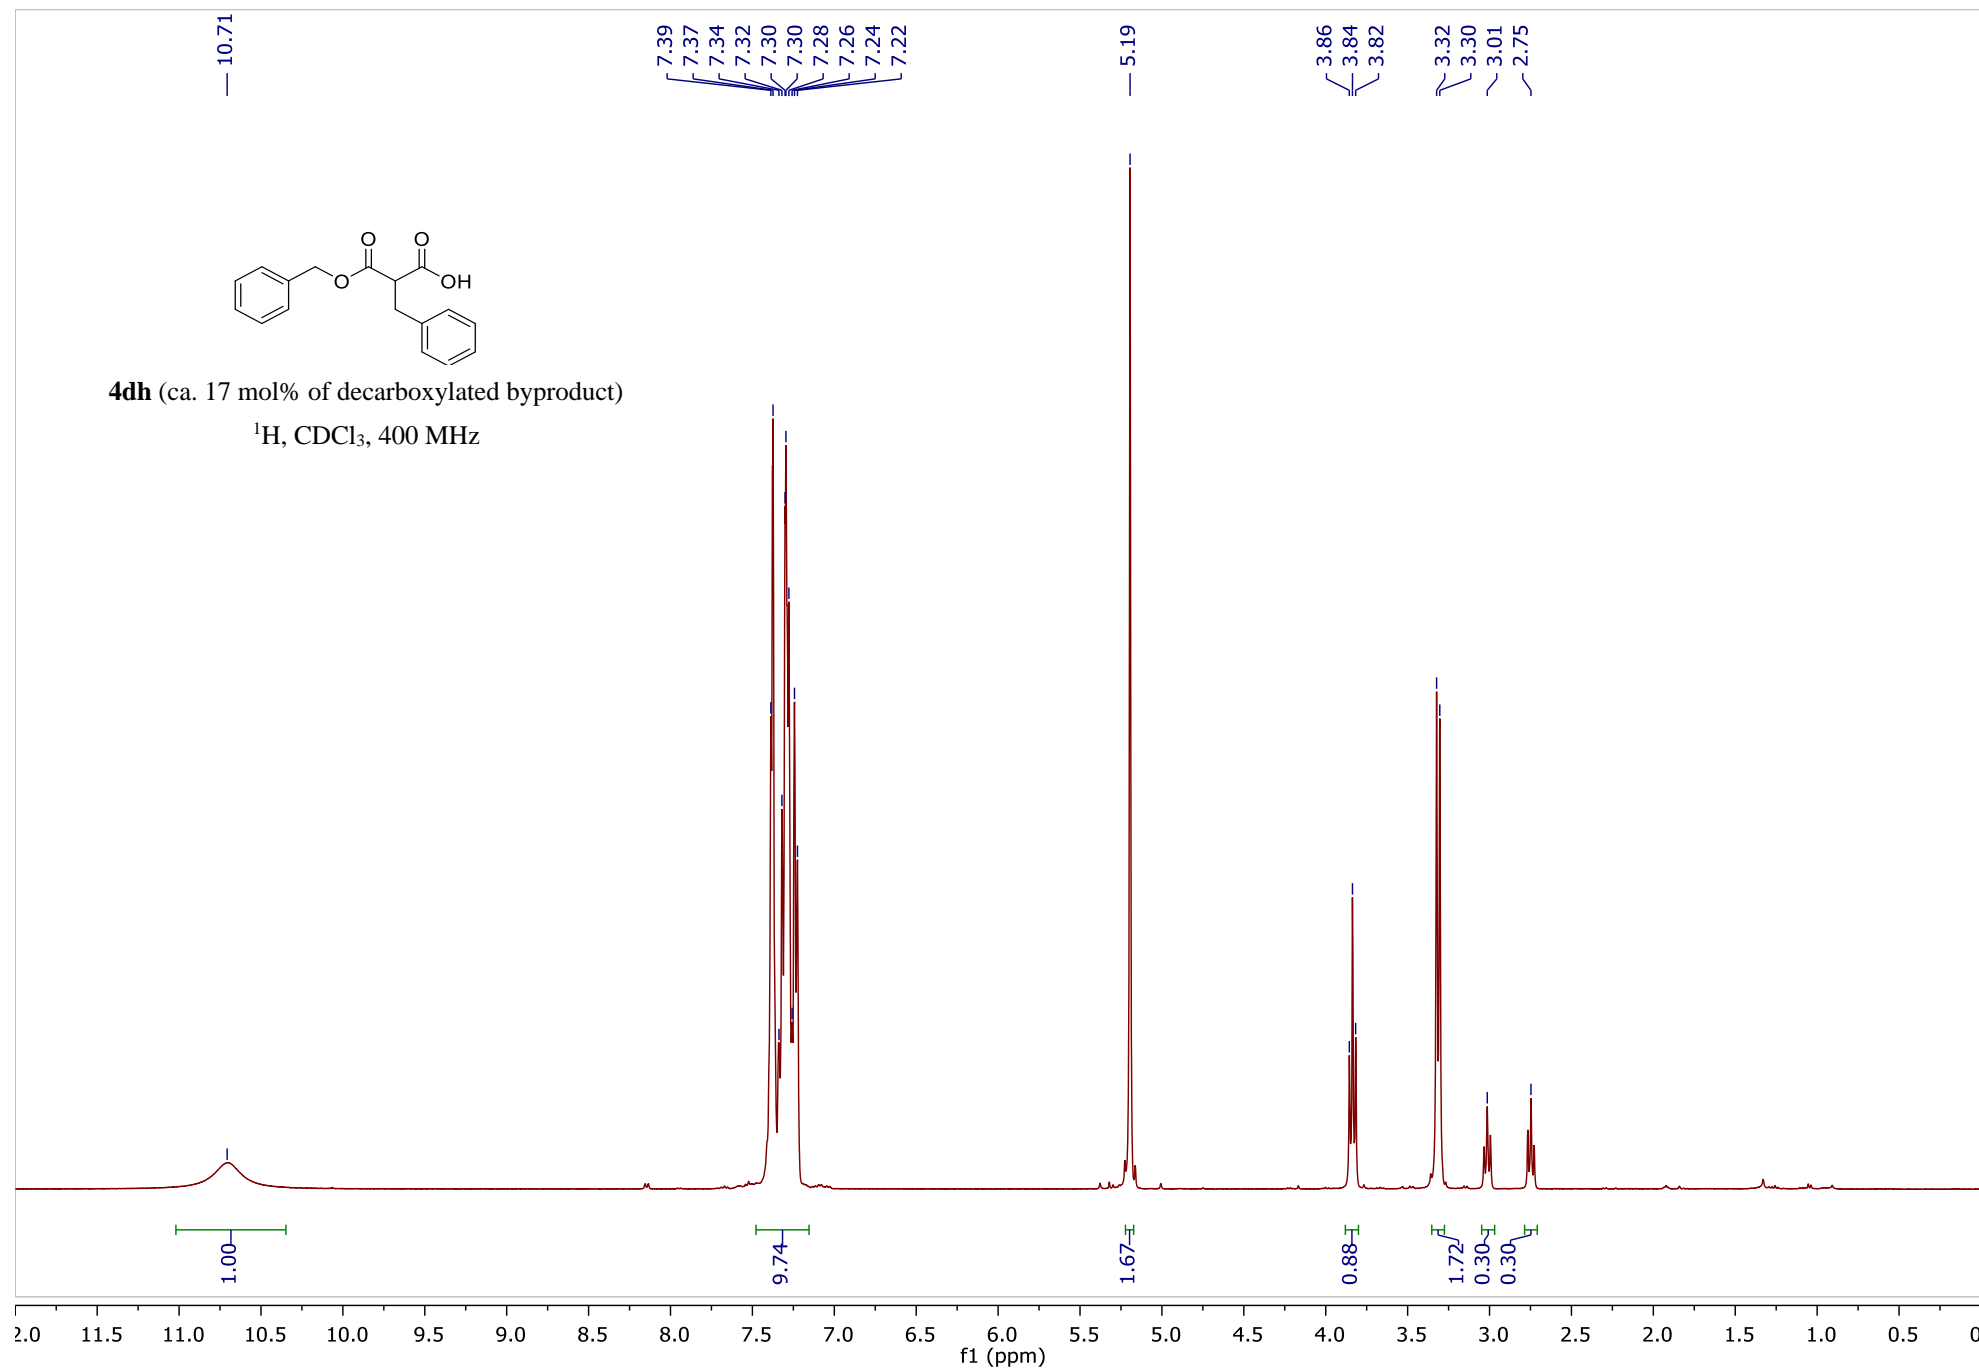

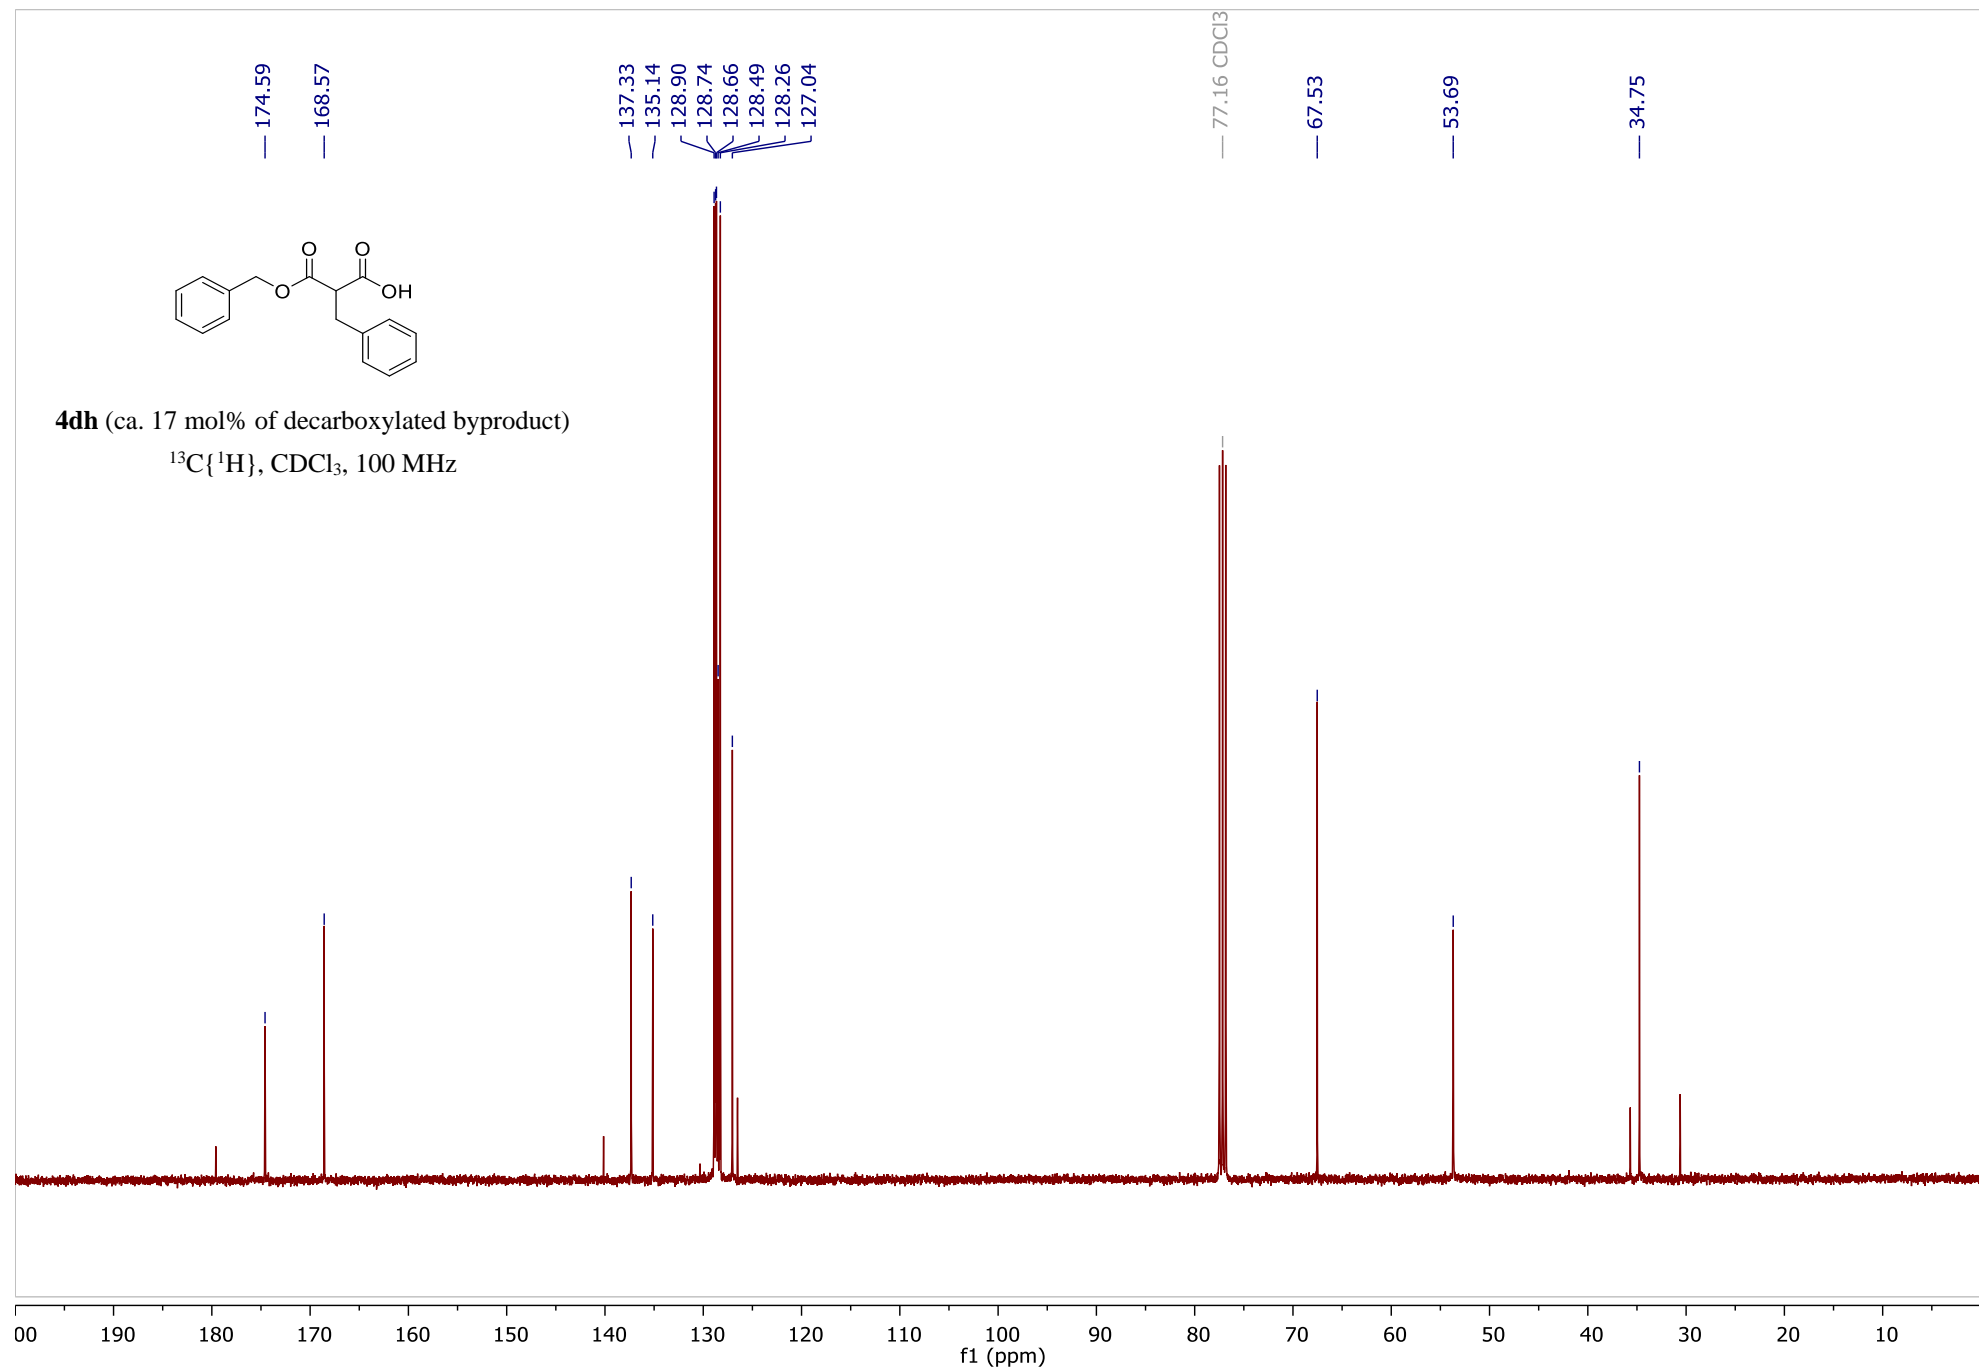

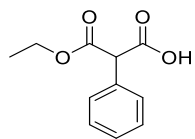

**4bs**

$^1\text{H}$ ,  $\text{CDCl}_3$ , 400 MHz

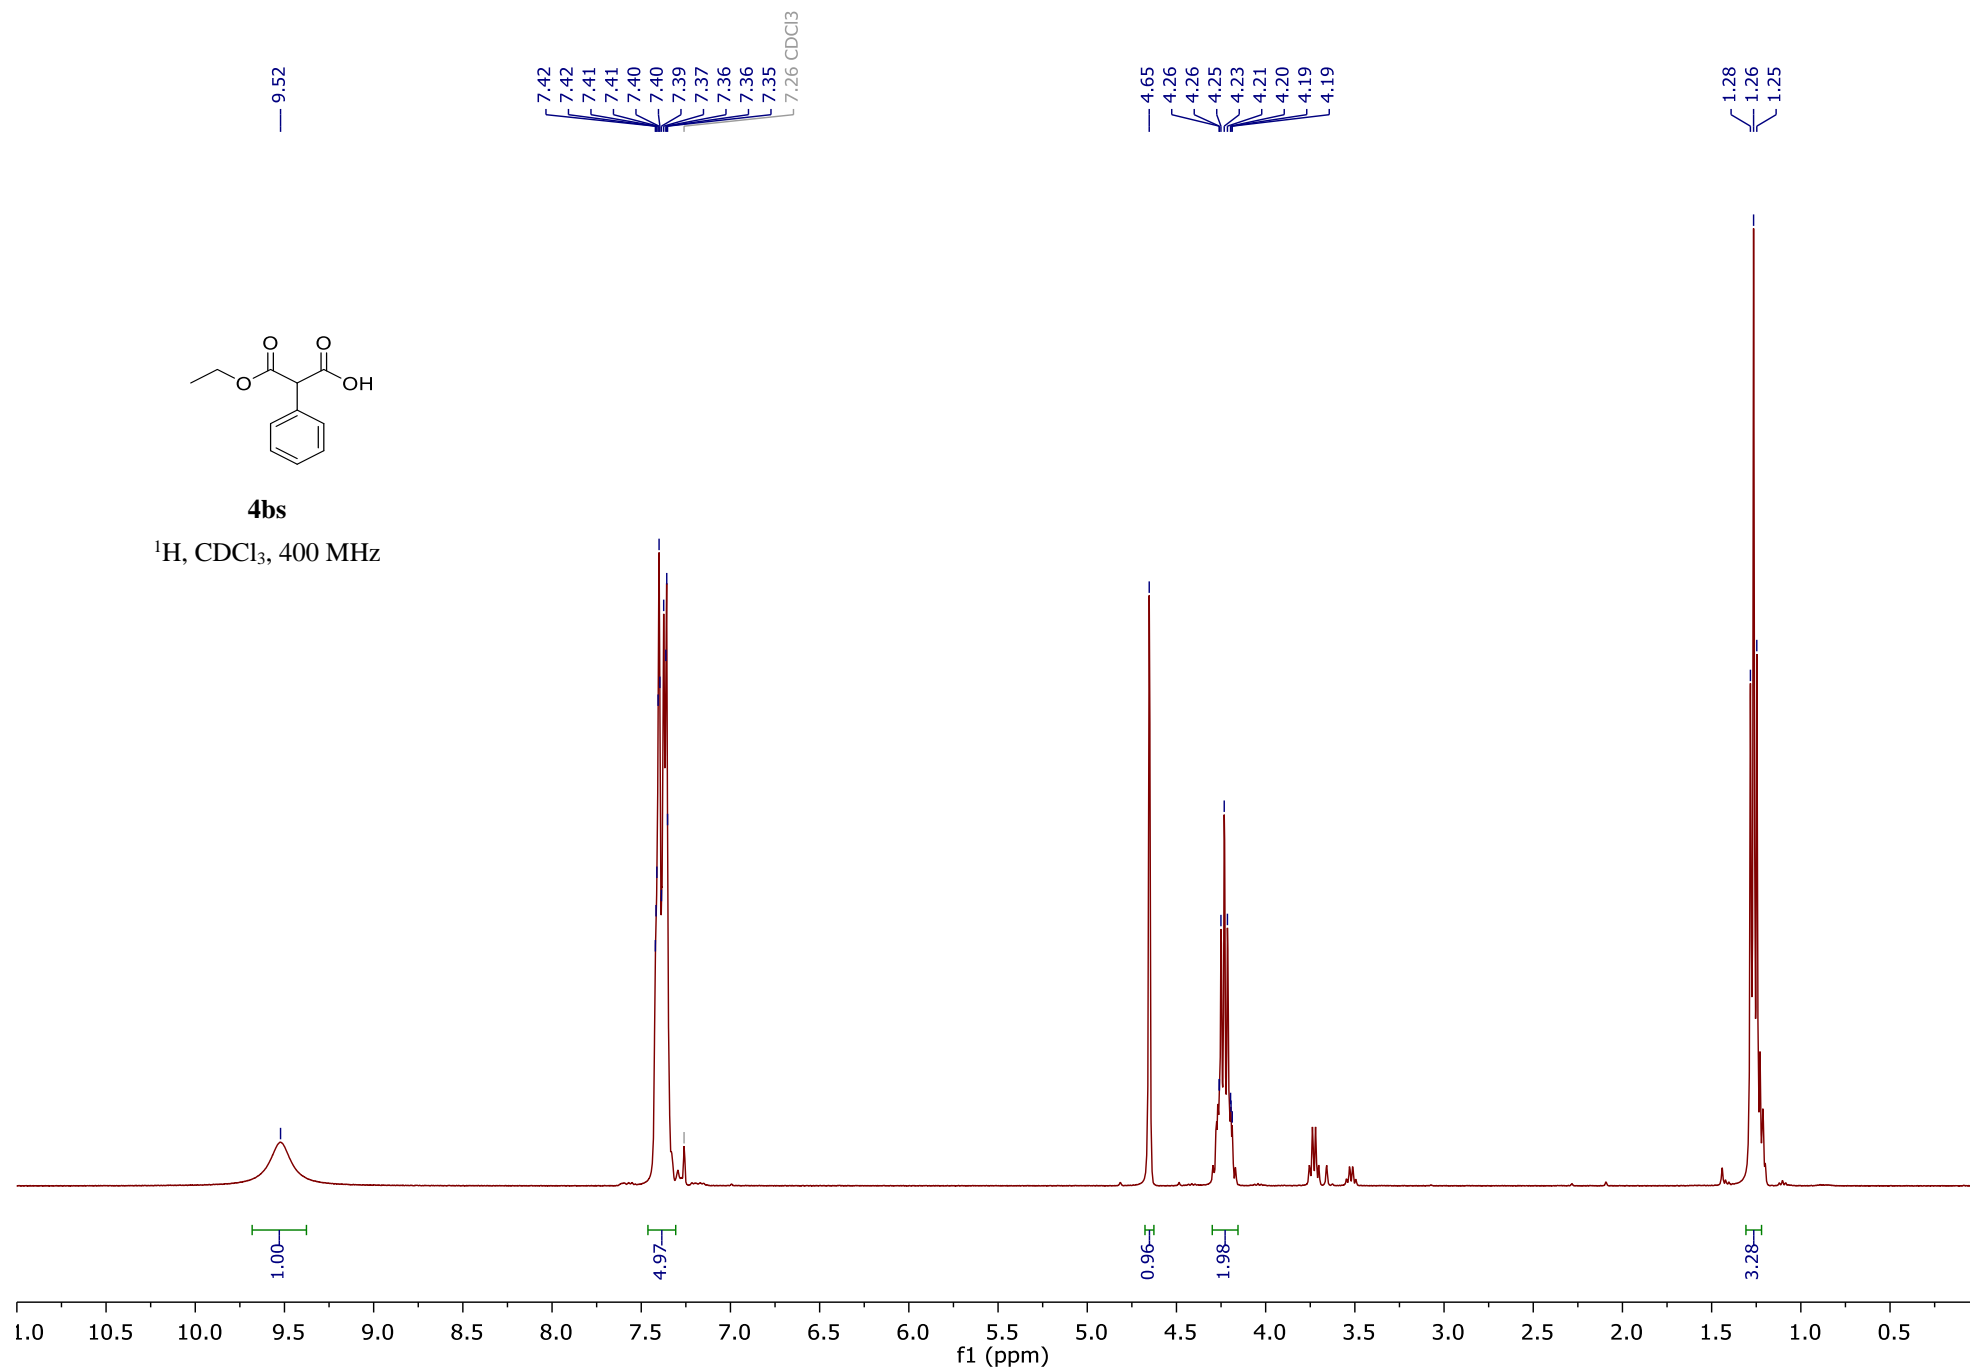

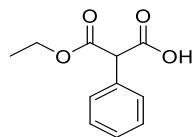

**4bs**

$^{13}\text{C}\{^1\text{H}\}$ ,  $\text{CDCl}_3$ , 100 MHz

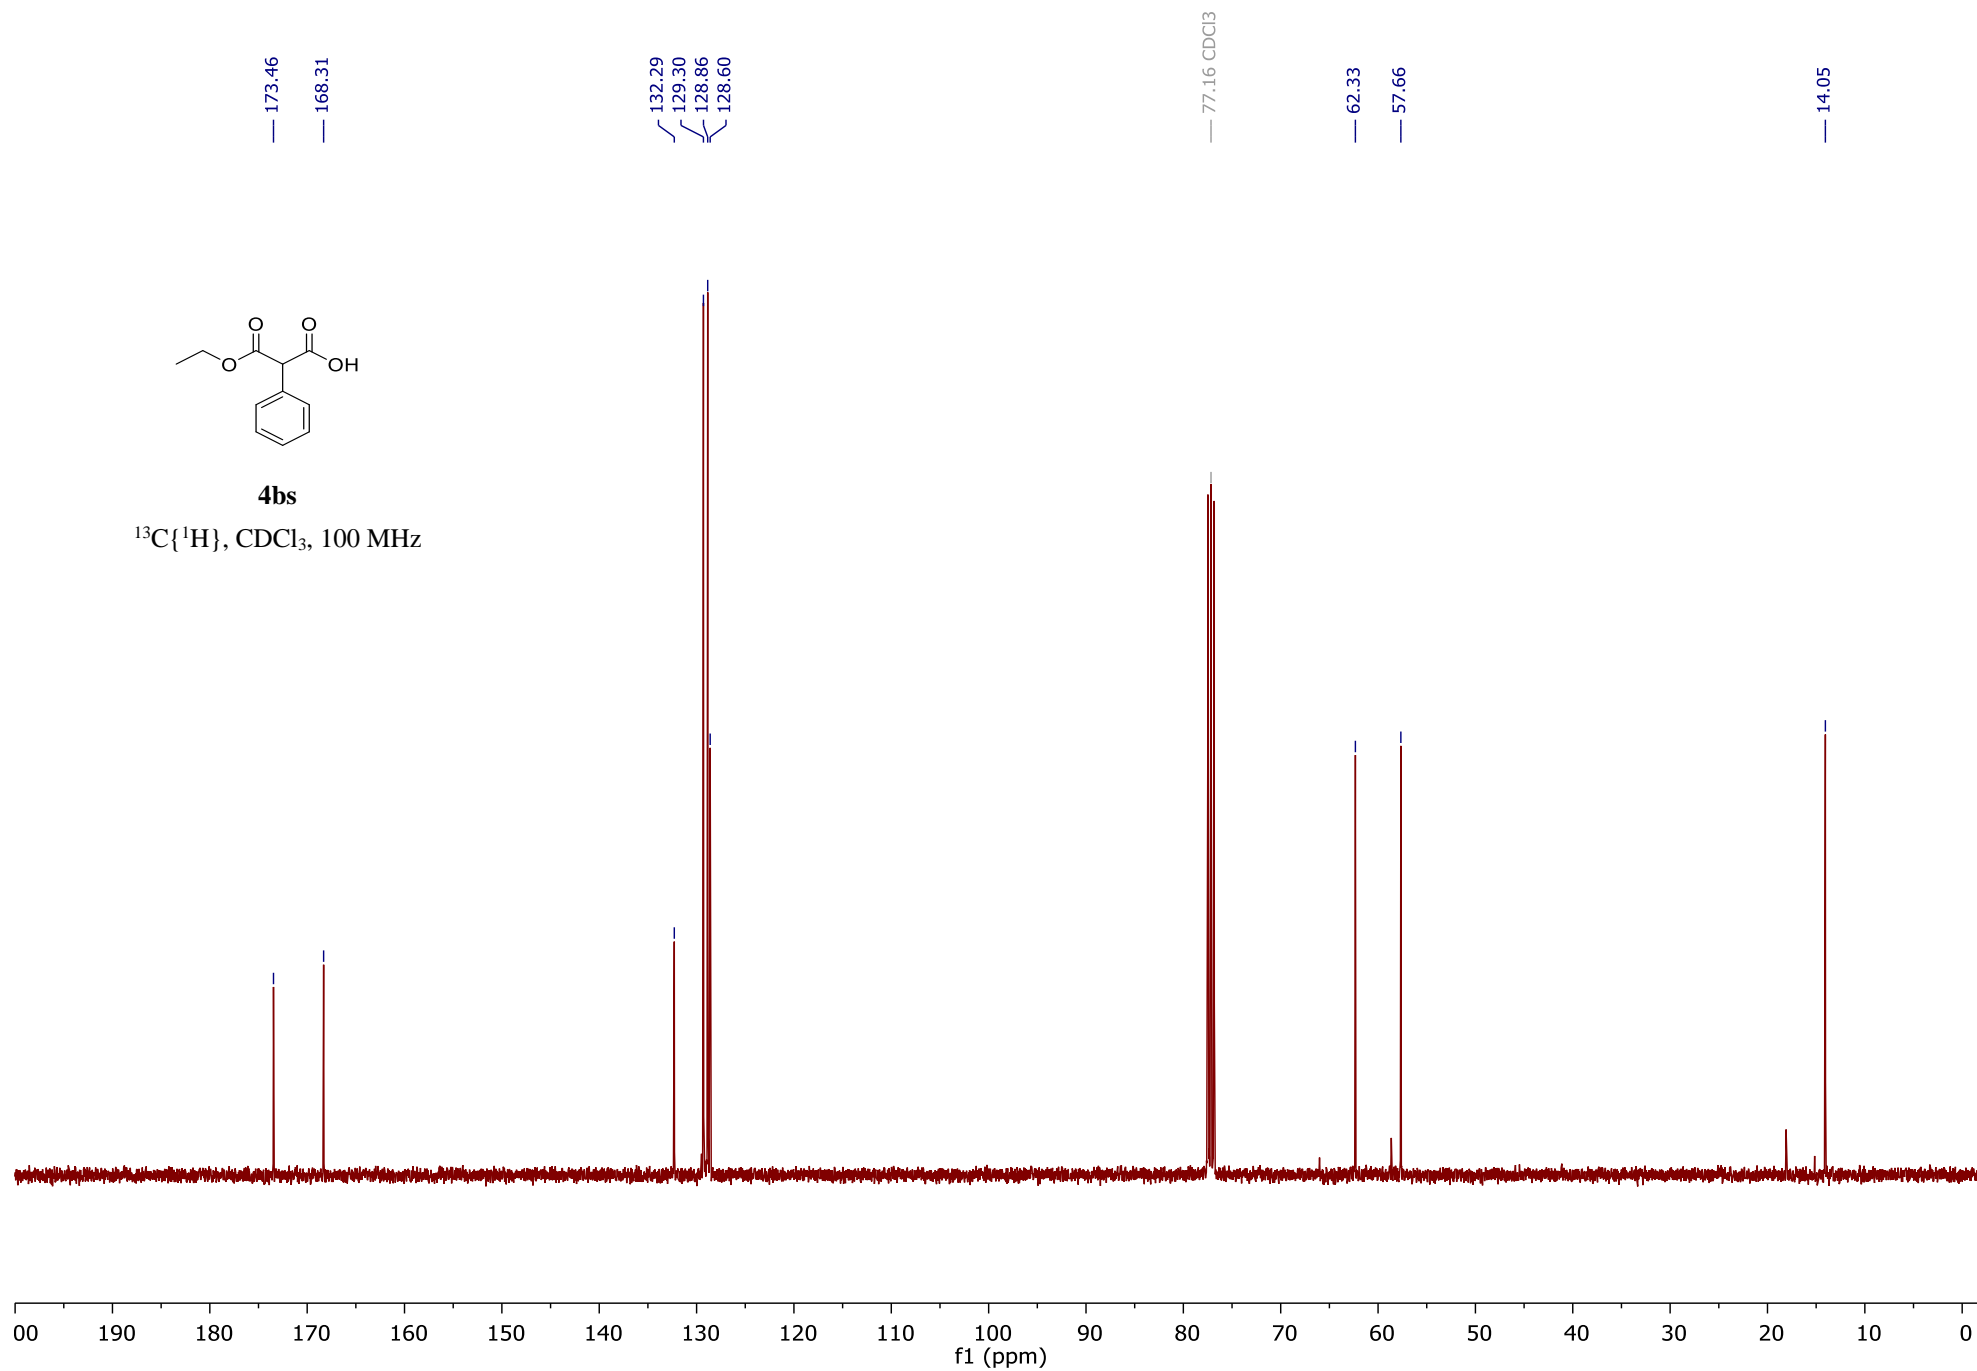

Supplement: Additional file 1 [file 1860-5397-17-135-S1.pdf]
